# Supplementary material
Source: PubMed Central journal article supplement (PMC6867250)

# Subject 1 – MR0044

|                                          | Value  |
|------------------------------------------|--------|
| Lesion Volume (ml)                       | 54.816 |
| Dice Coefficient                         | 0.797  |
| Jaccard Coefficient                      | 0.663  |
| Hausdorff Distance (mm)                  | 22.361 |
| Average Displacement (mm)                | 2.175  |
| Sensitivity (Recall, true positive rate) | 0.795  |
| Specificity (true negative rate)         | 0.999  |

Normalized T1

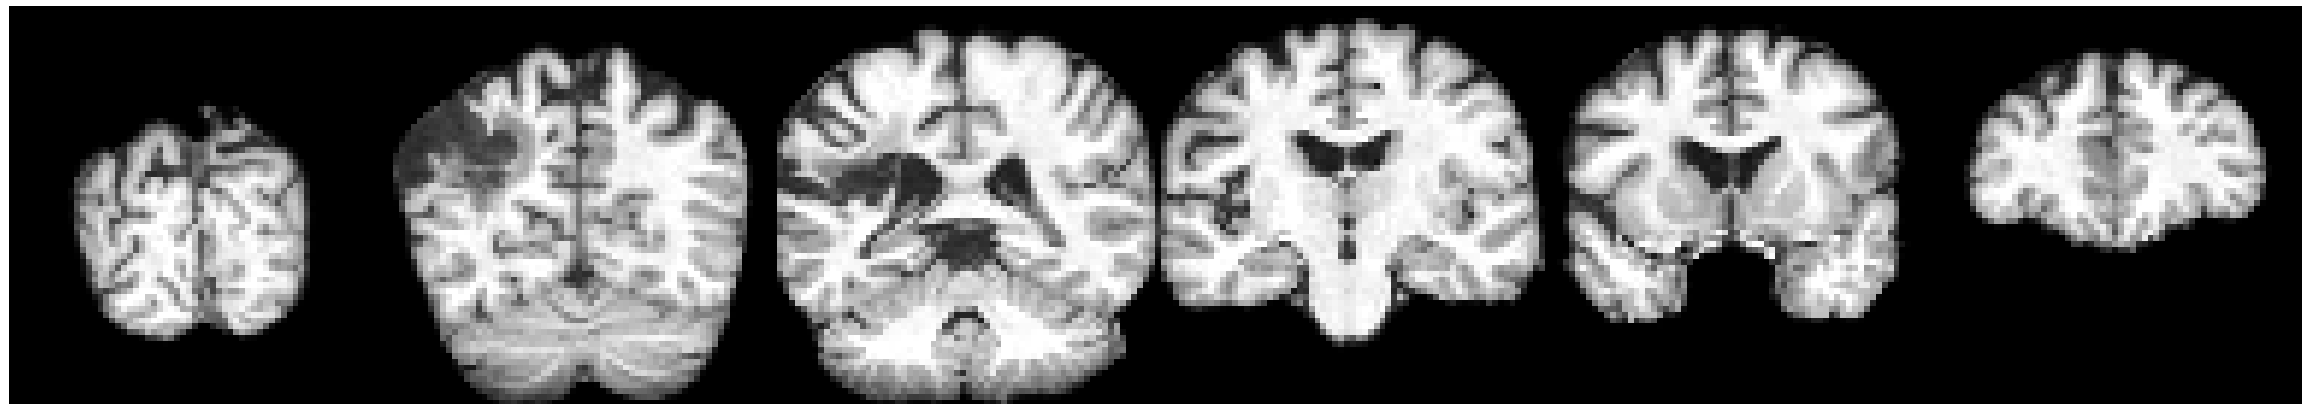

Lesion Overlay

red = Manual Tracing  
blue = LINDA prediction

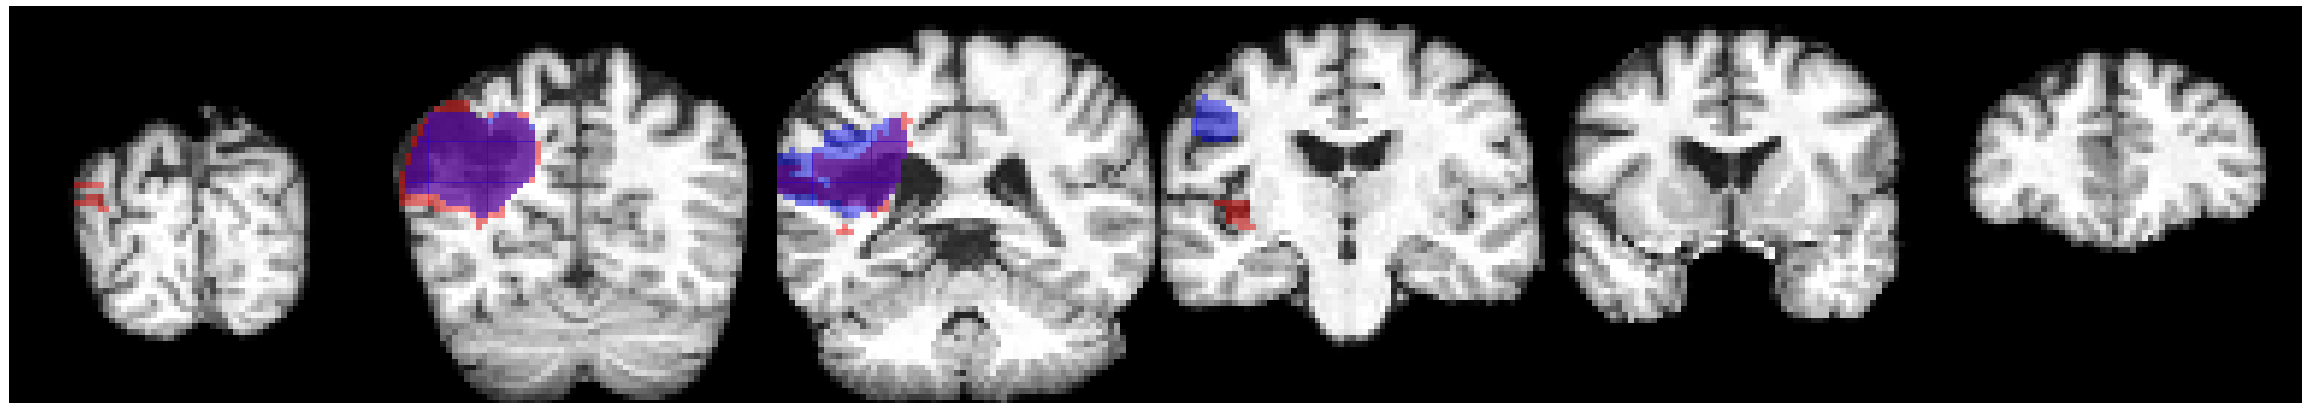

## Subject 2 – MR0047

|                                          | Value  |
|------------------------------------------|--------|
| Lesion Volume (ml)                       | 121.12 |
| Dice Coefficient                         | 0.819  |
| Jaccard Coefficient                      | 0.694  |
| Hausdorff Distance (mm)                  | 11.662 |
| Average Displacement (mm)                | 2.011  |
| Sensitivity (Recall, true positive rate) | 0.901  |
| Specificity (true negative rate)         | 0.995  |

Normalized T1

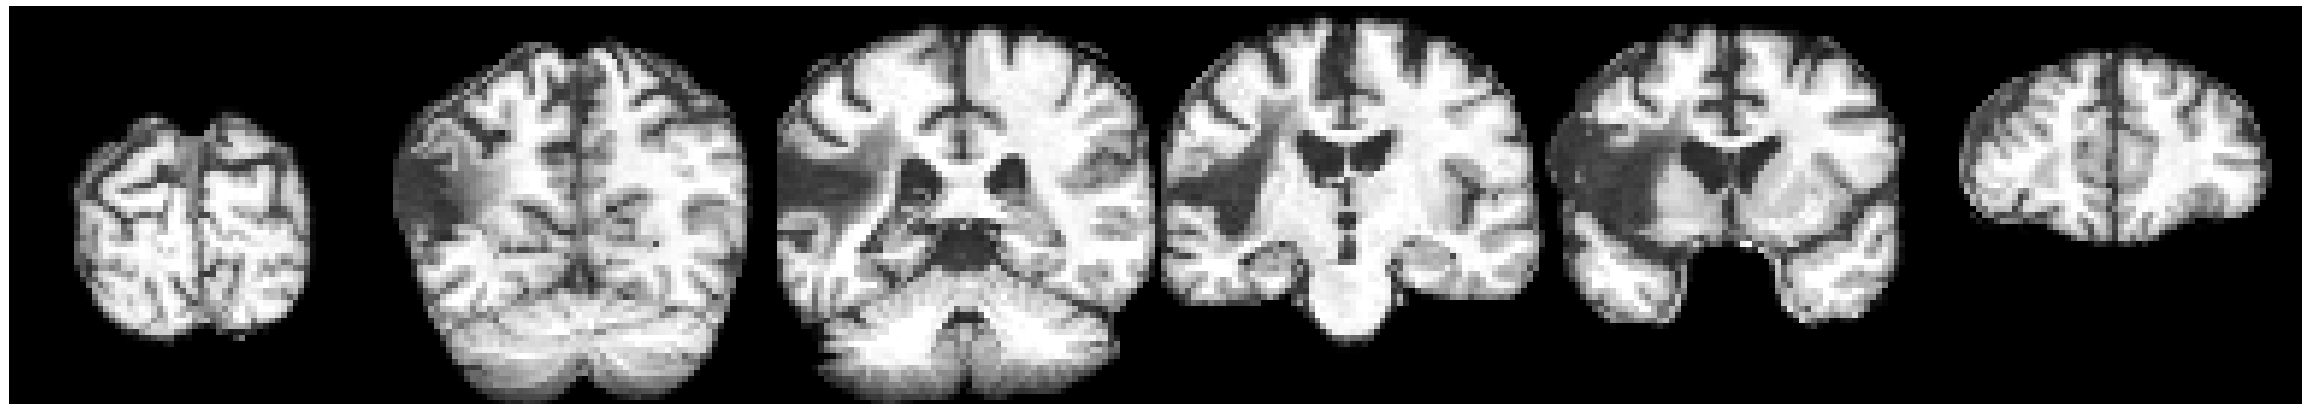

Lesion Overlay

red = Manual Tracing  
blue = LINDA prediction

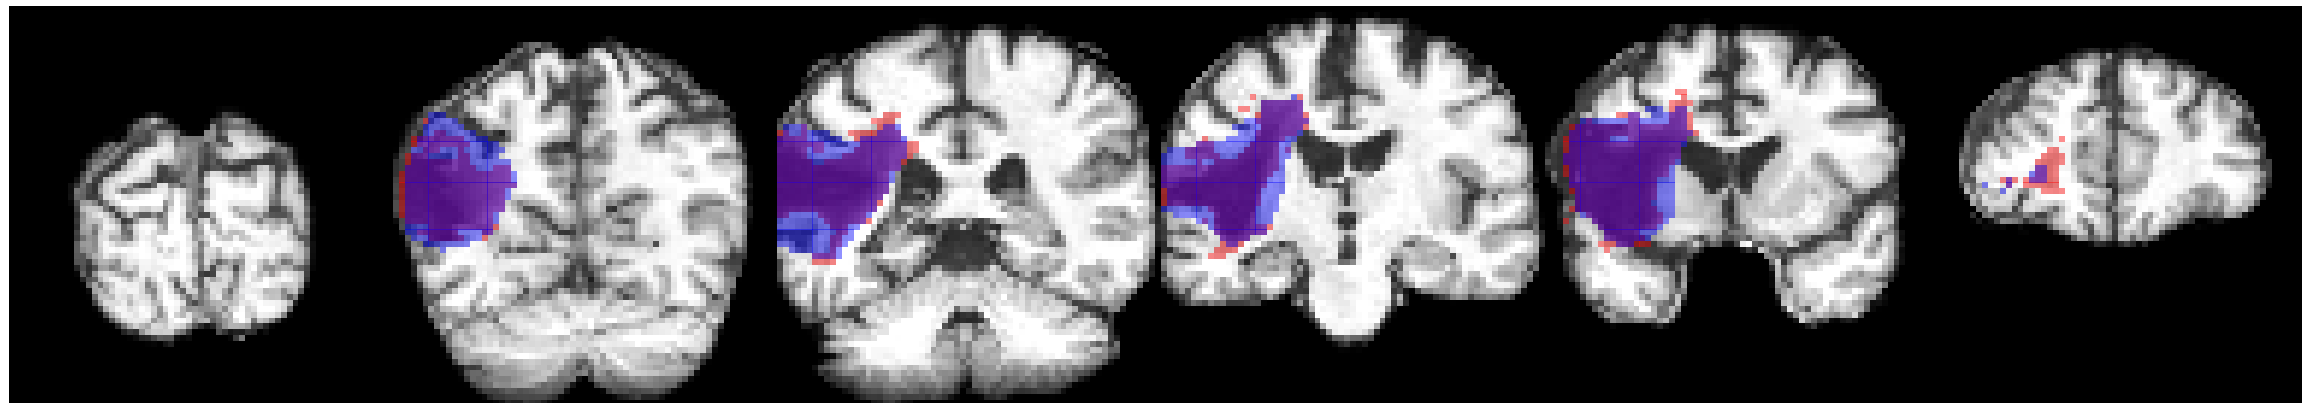

## Subject 3 – MR0186

|                                          | Value   |
|------------------------------------------|---------|
| Lesion Volume (ml)                       | 165.112 |
| Dice Coefficient                         | 0.835   |
| Jaccard Coefficient                      | 0.717   |
| Hausdorff Distance (mm)                  | 14.142  |
| Average Displacement (mm)                | 2.221   |
| Sensitivity (Recall, true positive rate) | 0.894   |
| Specificity (true negative rate)         | 0.995   |

Normalized T1

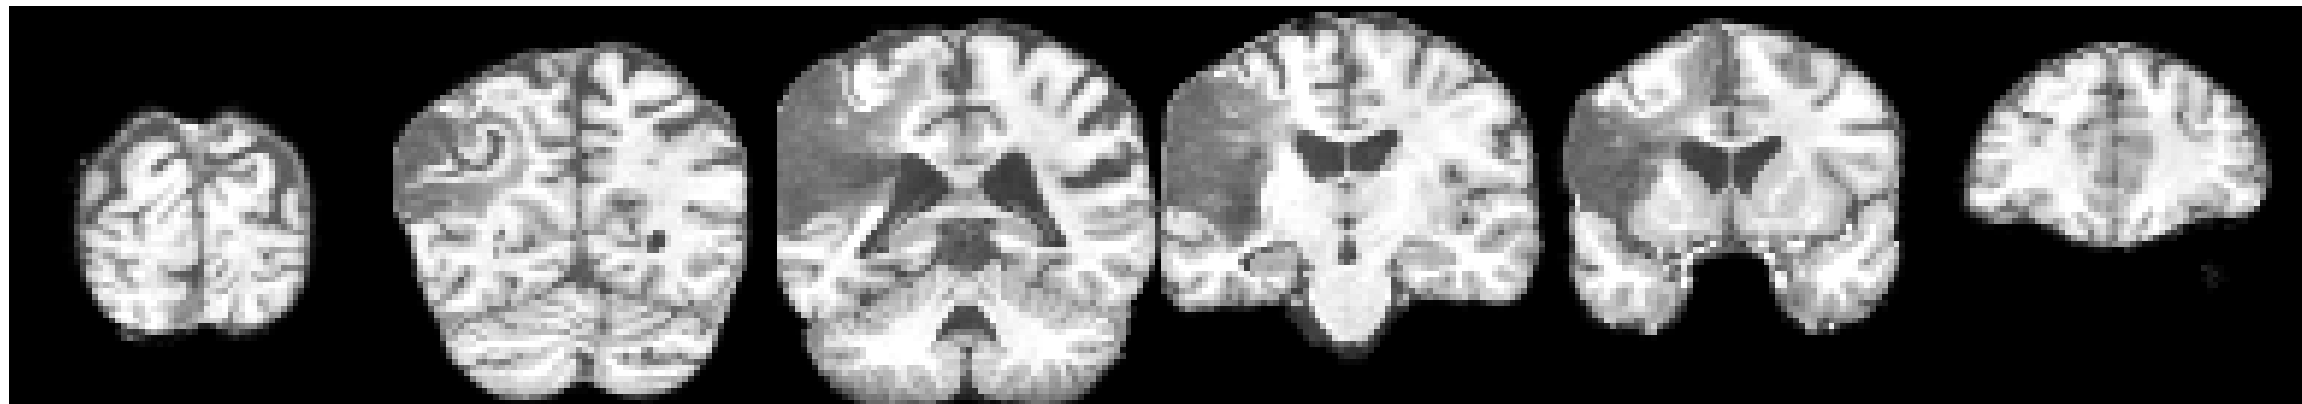

Lesion Overlay

red = Manual Tracing  
blue = LINDA prediction

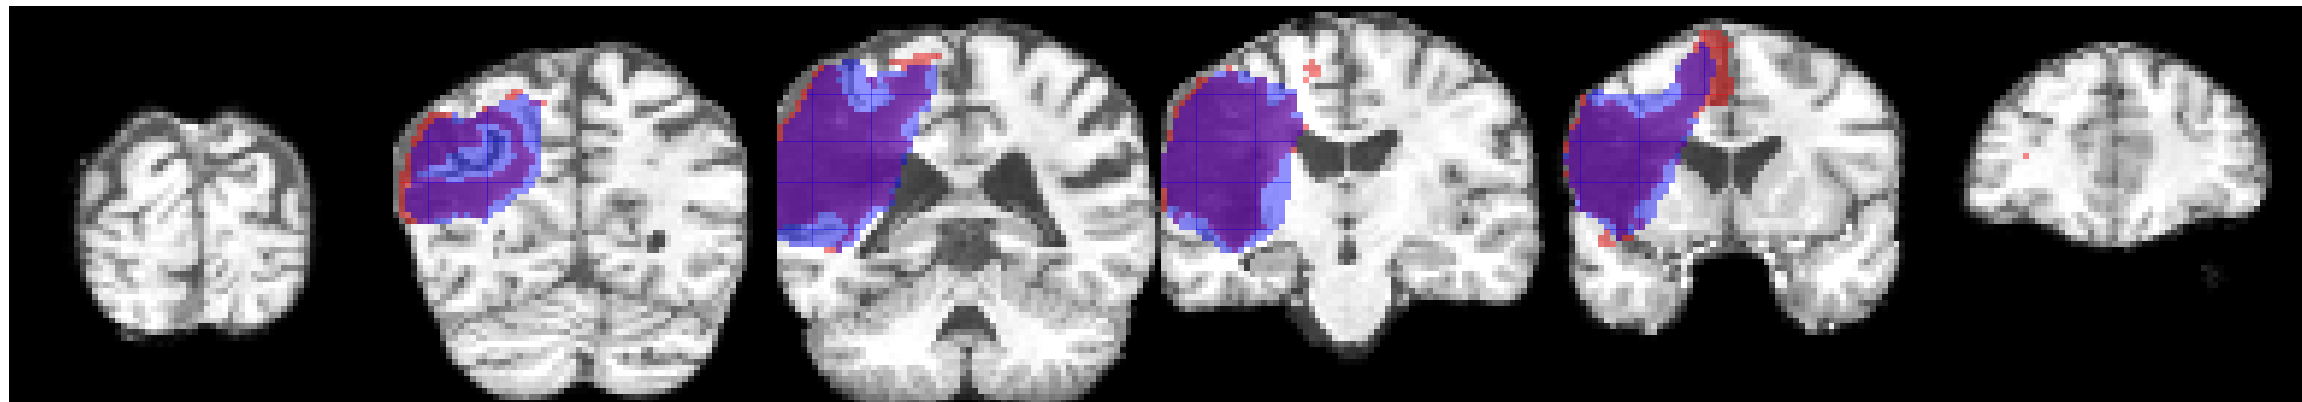

## Subject 4 – MR0190

|                                          | Value  |
|------------------------------------------|--------|
| Lesion Volume (ml)                       | 141.28 |
| Dice Coefficient                         | 0.81   |
| Jaccard Coefficient                      | 0.681  |
| Hausdorff Distance (mm)                  | 11.832 |
| Average Displacement (mm)                | 1.813  |
| Sensitivity (Recall, true positive rate) | 0.748  |
| Specificity (true negative rate)         | 0.998  |

Normalized T1

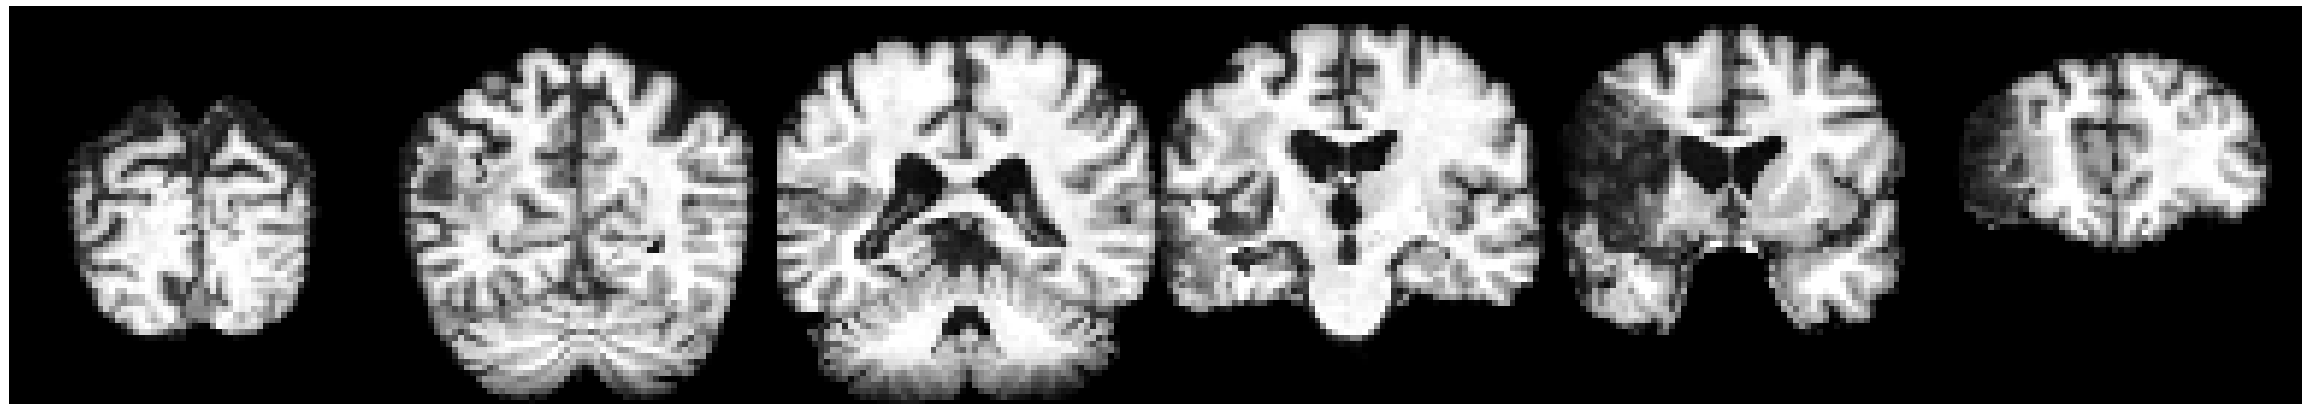

Lesion Overlay

red = Manual Tracing  
blue = LINDA prediction

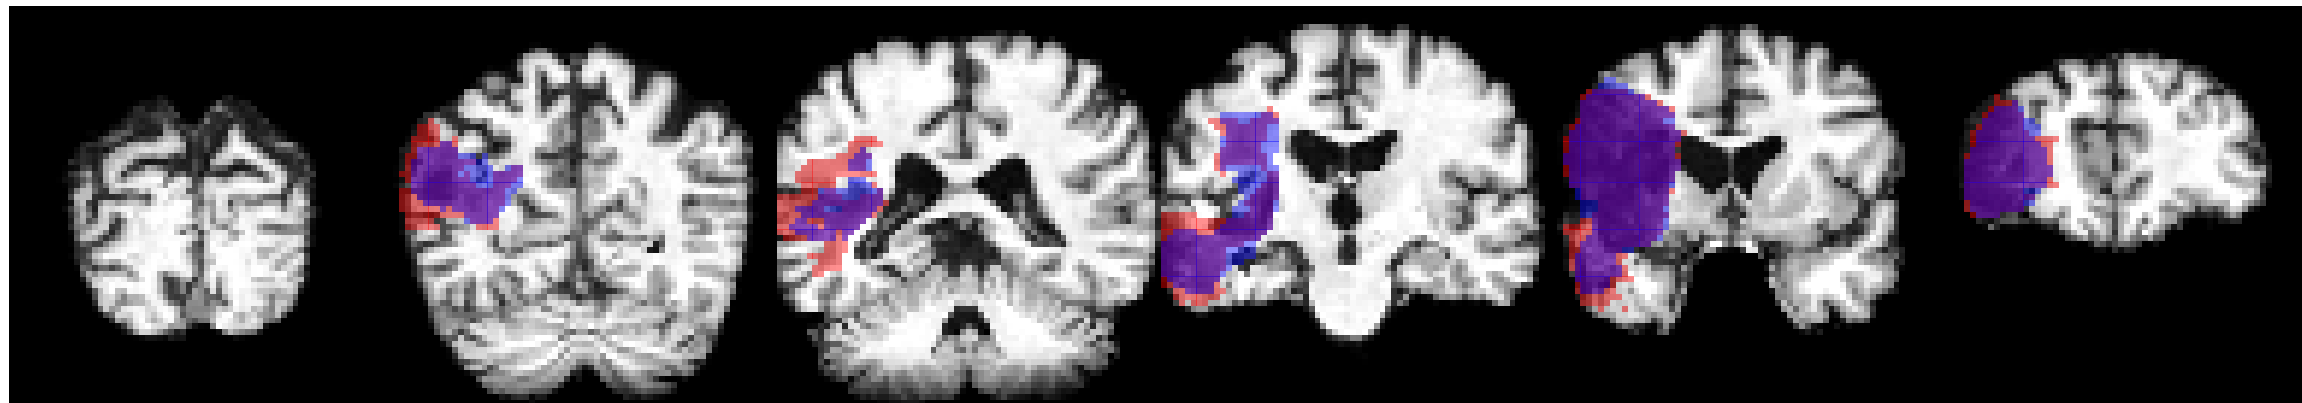

# Subject 5 – MR0193

|                                          | Value  |
|------------------------------------------|--------|
| Lesion Volume (ml)                       | 151.64 |
| Dice Coefficient                         | 0.868  |
| Jaccard Coefficient                      | 0.767  |
| Hausdorff Distance (mm)                  | 11.662 |
| Average Displacement (mm)                | 1.645  |
| Sensitivity (Recall, true positive rate) | 0.907  |
| Specificity (true negative rate)         | 0.996  |

Normalized T1

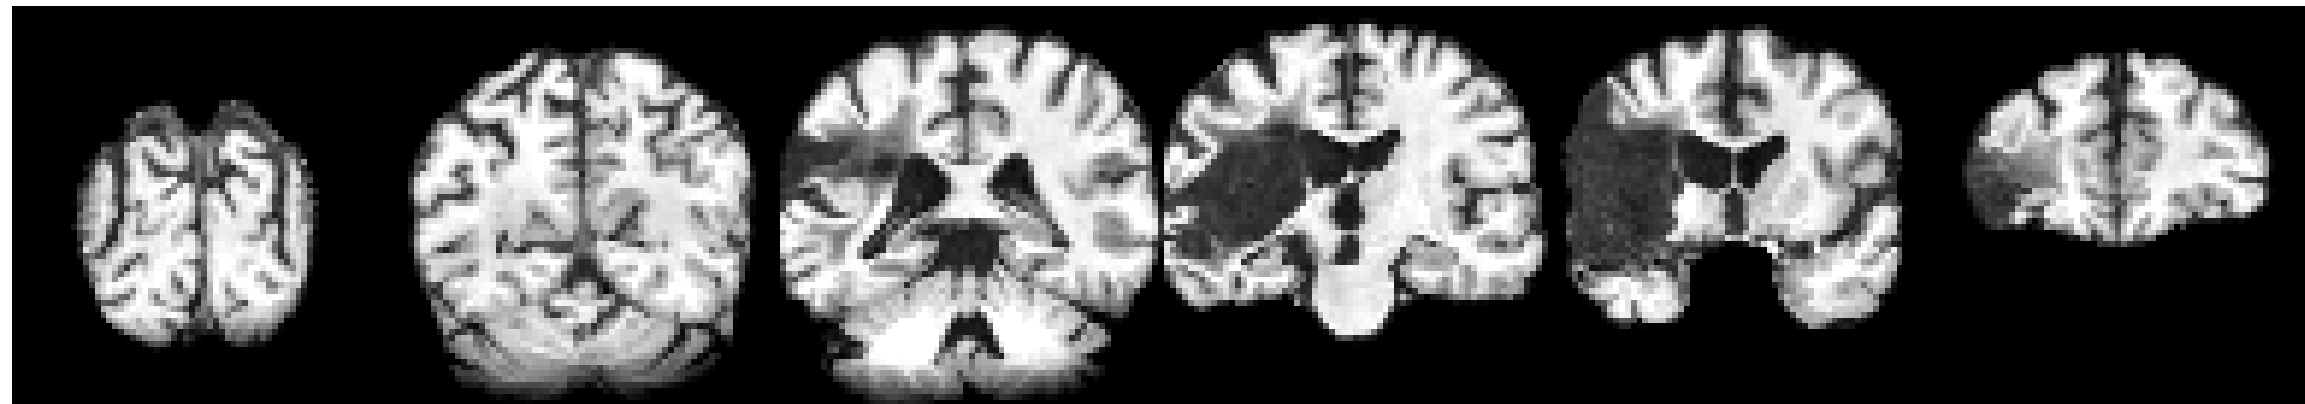

Lesion Overlay

red = Manual Tracing  
blue = LINDA prediction

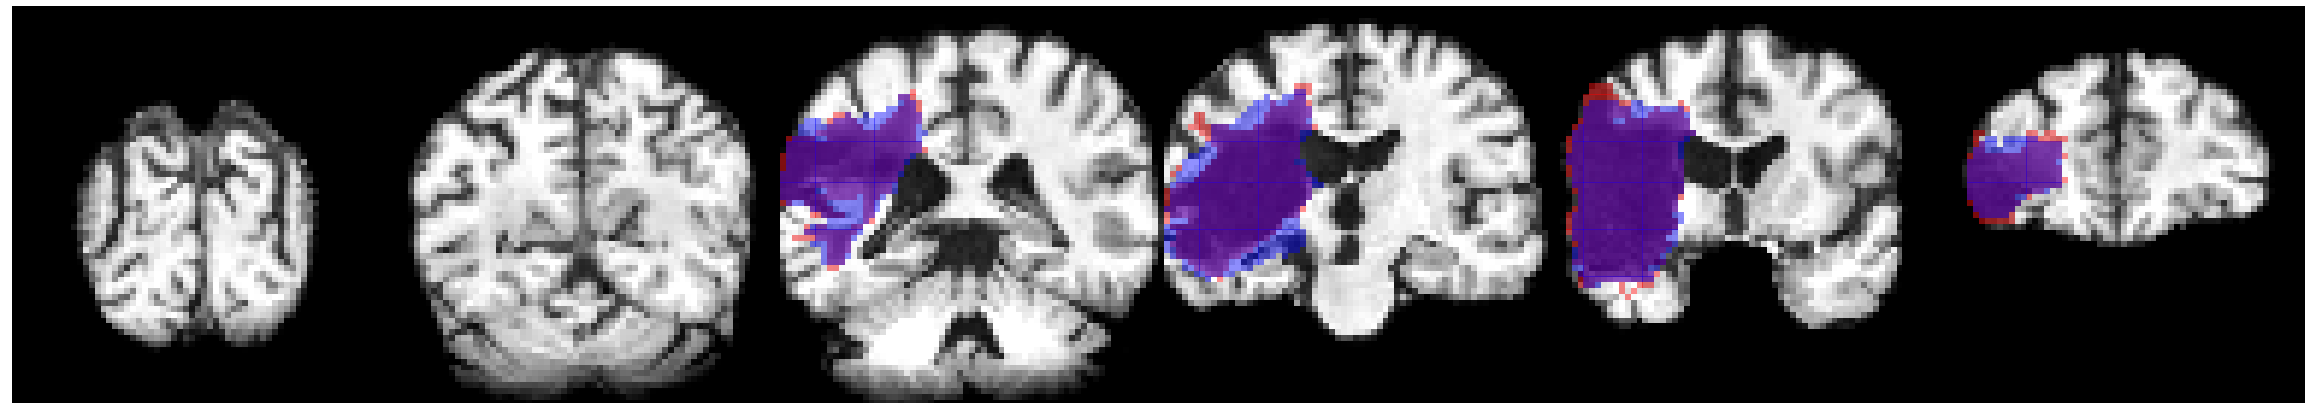

## Subject 6 – MR0253

|                                          | Value  |
|------------------------------------------|--------|
| Lesion Volume (ml)                       | 91.784 |
| Dice Coefficient                         | 0.833  |
| Jaccard Coefficient                      | 0.713  |
| Hausdorff Distance (mm)                  | 8.246  |
| Average Displacement (mm)                | 1.816  |
| Sensitivity (Recall, true positive rate) | 0.908  |
| Specificity (true negative rate)         | 0.997  |

Normalized T1

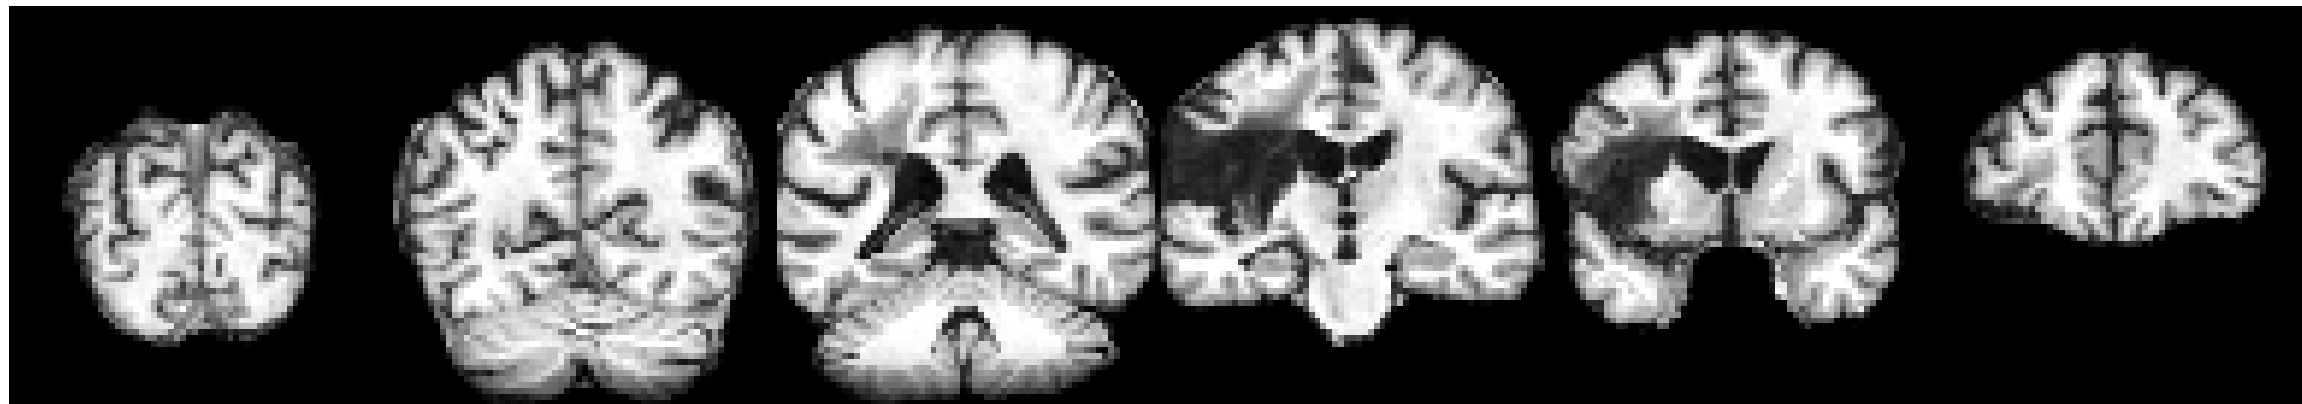

Lesion Overlay

red = Manual Tracing  
blue = LINDA prediction

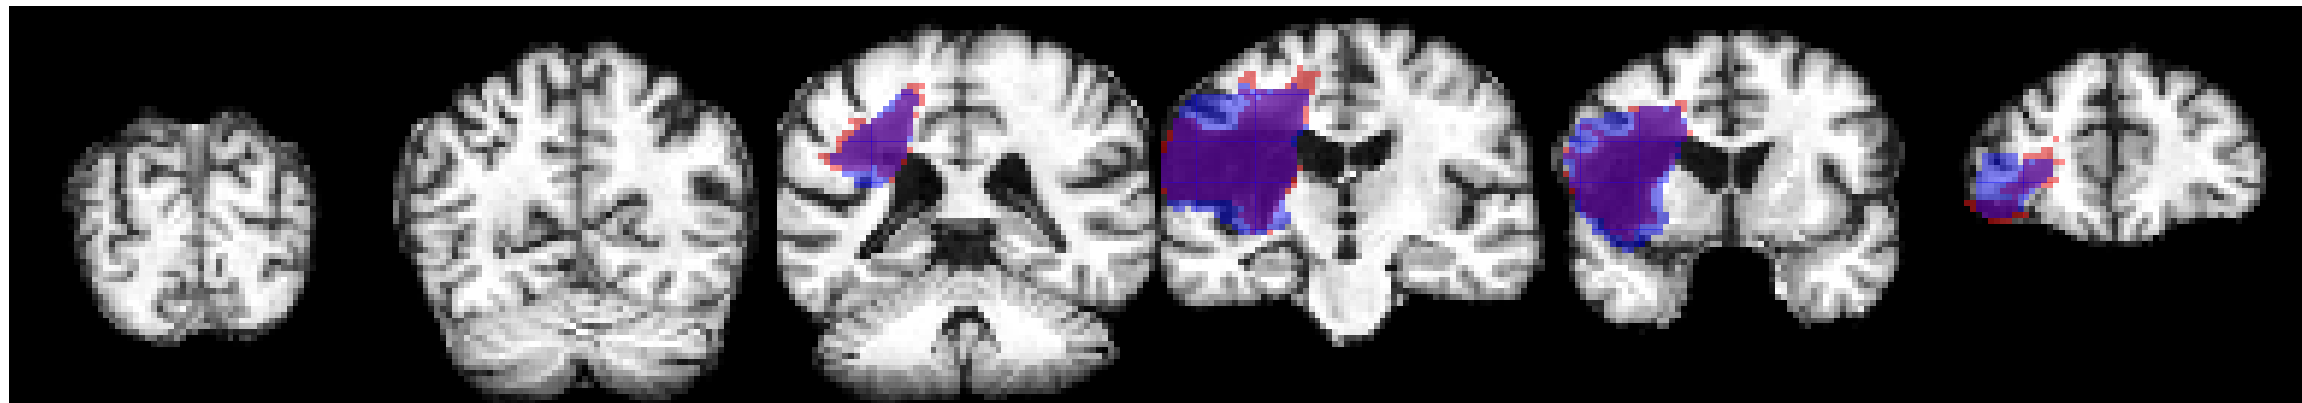

# Subject 7 – MR0281

|                                          | Value   |
|------------------------------------------|---------|
| Lesion Volume (ml)                       | 109.024 |
| Dice Coefficient                         | 0.873   |
| Jaccard Coefficient                      | 0.775   |
| Hausdorff Distance (mm)                  | 17.205  |
| Average Displacement (mm)                | 1.455   |
| Sensitivity (Recall, true positive rate) | 0.867   |
| Specificity (true negative rate)         | 0.998   |

Normalized T1

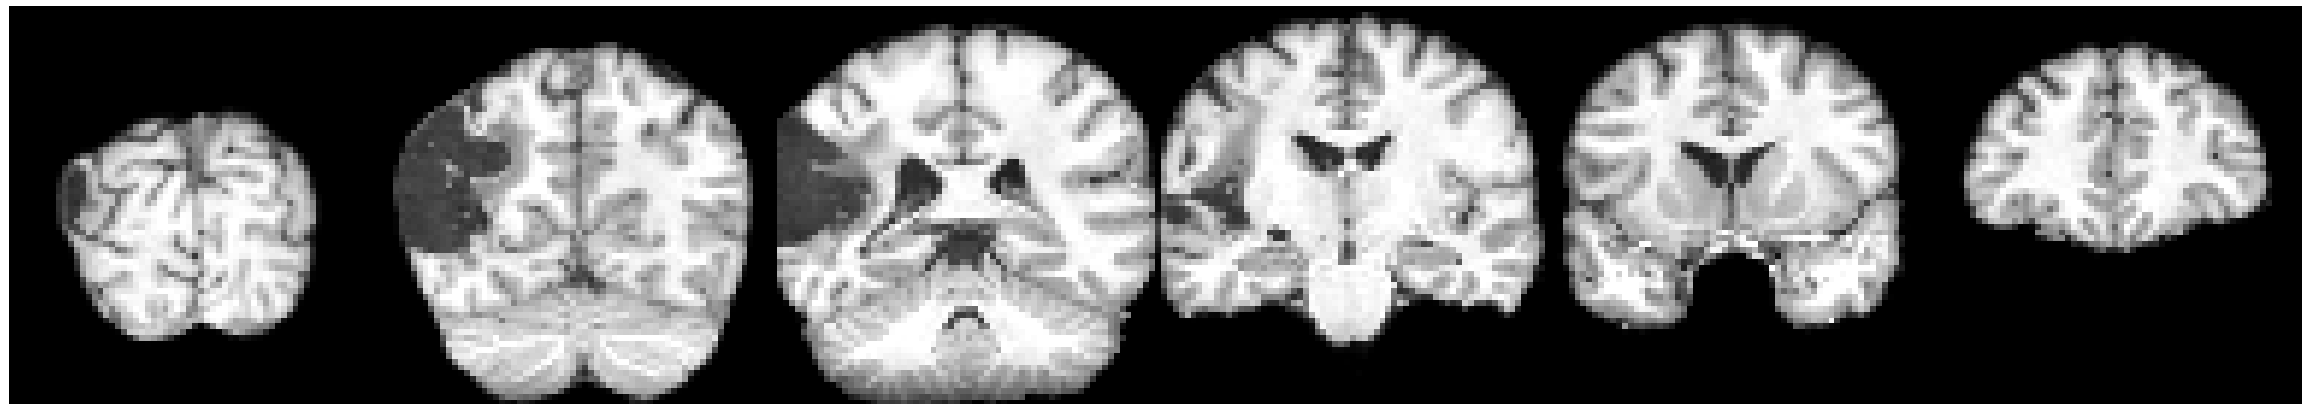

Lesion Overlay

red = Manual Tracing  
blue = LINDA prediction

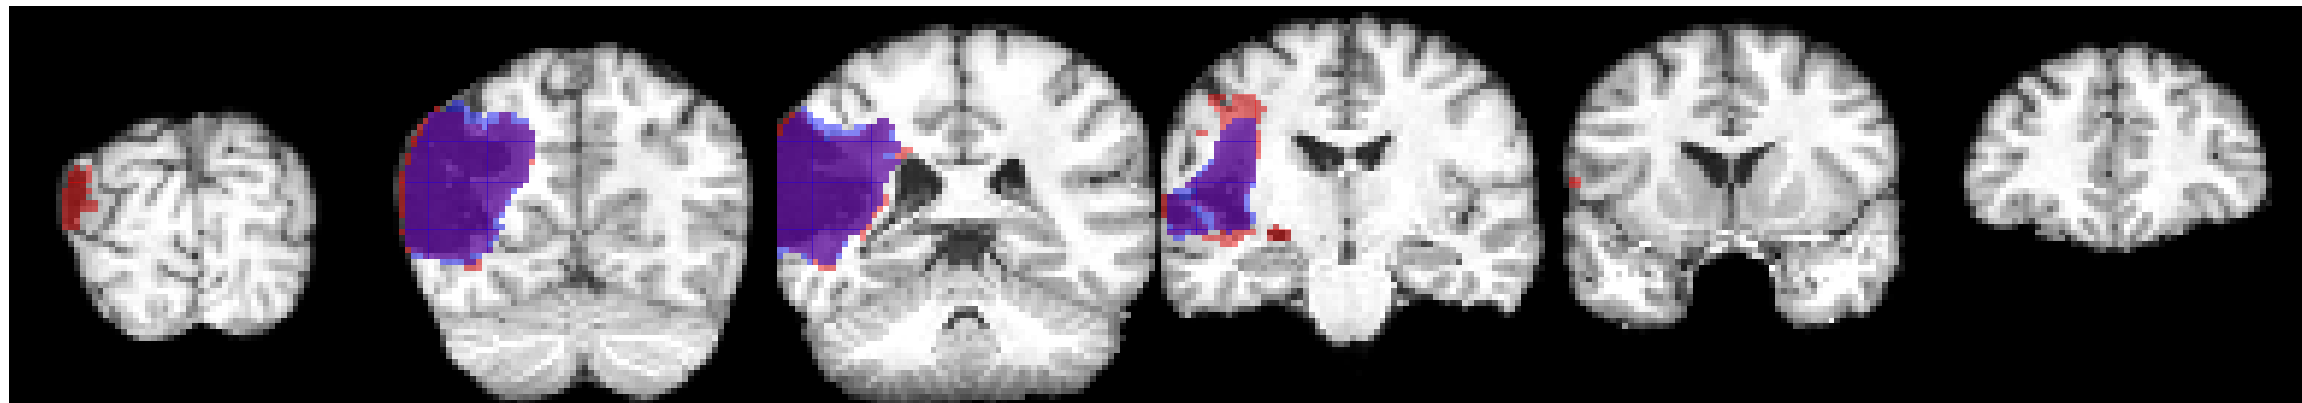

## Subject 8 – MR0322

|                                          | Value  |
|------------------------------------------|--------|
| Lesion Volume (ml)                       | 12.456 |
| Dice Coefficient                         | 0.565  |
| Jaccard Coefficient                      | 0.394  |
| Hausdorff Distance (mm)                  | 12.806 |
| Average Displacement (mm)                | 2.62   |
| Sensitivity (Recall, true positive rate) | 0.816  |
| Specificity (true negative rate)         | 0.998  |

Normalized T1

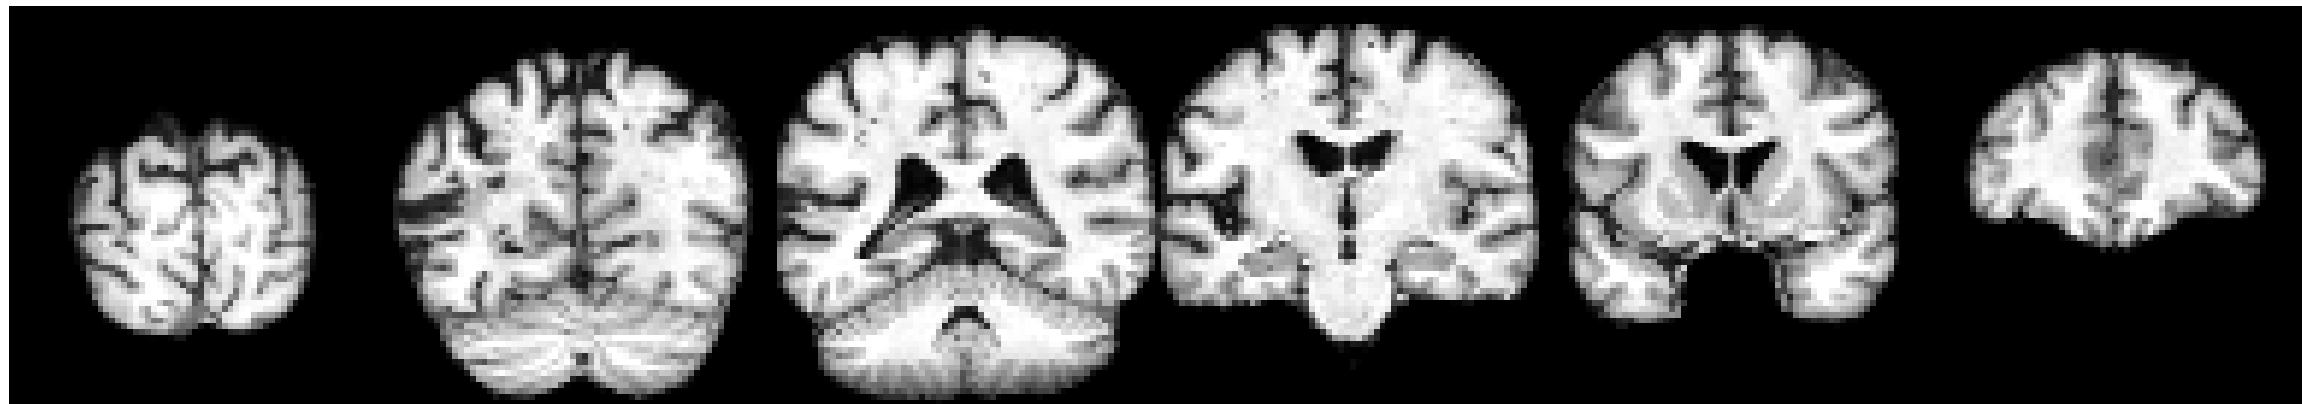

Lesion Overlay

red = Manual Tracing  
blue = LINDA prediction

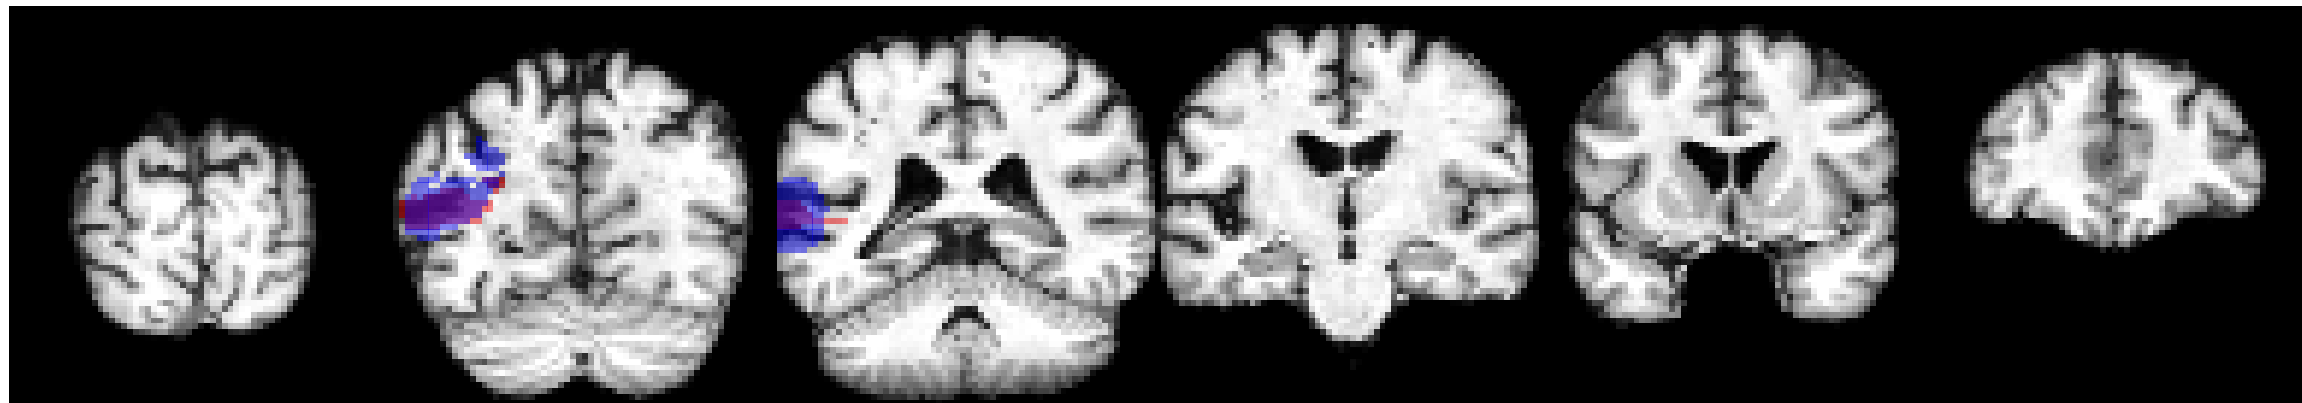



# Subject 9 – MR0444

|                                          | Value  |
|------------------------------------------|--------|
| Lesion Volume (ml)                       | 50.712 |
| Dice Coefficient                         | 0.772  |
| Jaccard Coefficient                      | 0.629  |
| Hausdorff Distance (mm)                  | 19.799 |
| Average Displacement (mm)                | 2.213  |
| Sensitivity (Recall, true positive rate) | 0.719  |
| Specificity (true negative rate)         | 0.999  |

Normalized T1

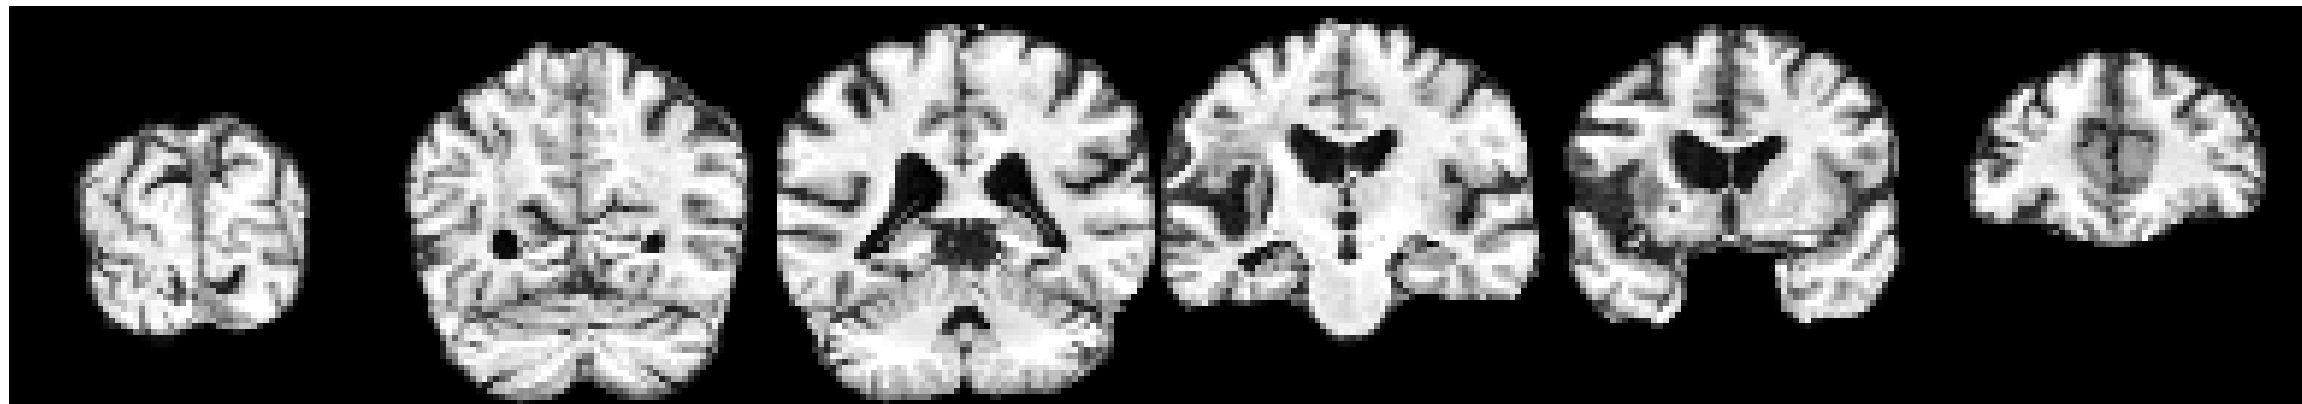

Lesion Overlay

red = Manual Tracing  
blue = LINDA prediction

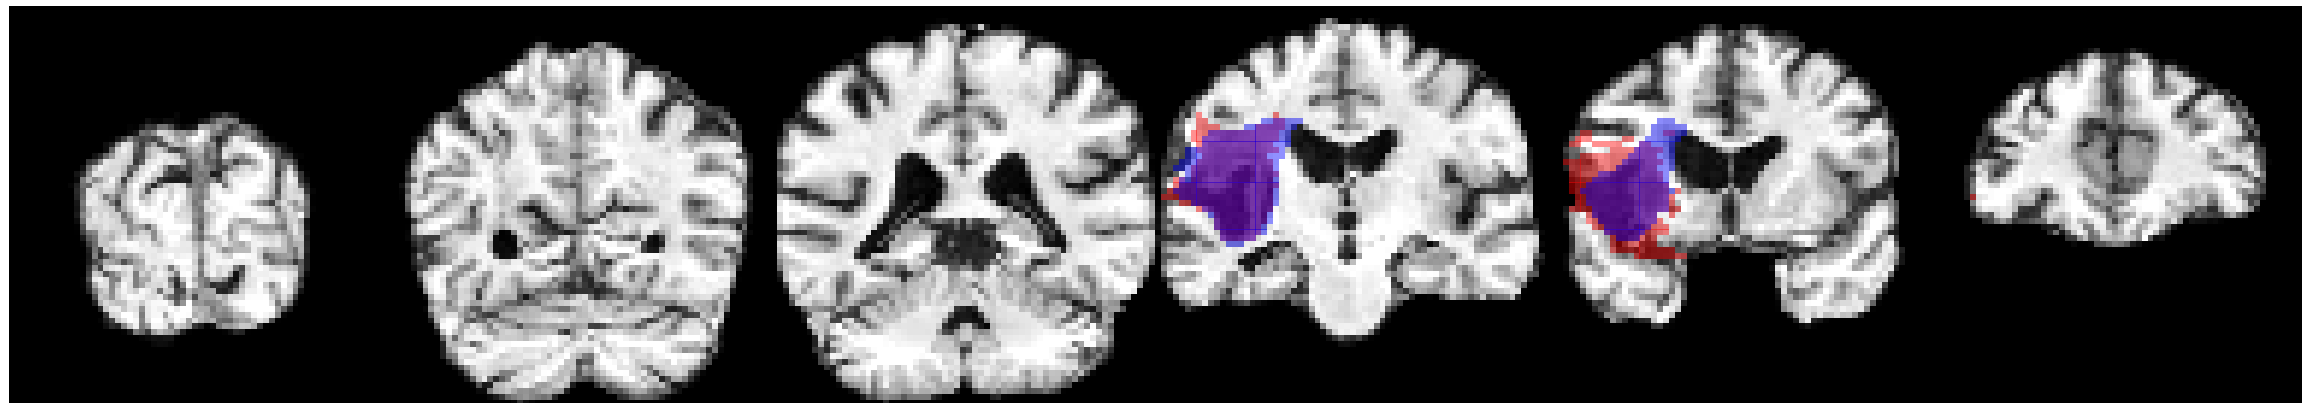

## Subject 10 – MR0583

|                                          | Value   |
|------------------------------------------|---------|
| Lesion Volume (ml)                       | 250.752 |
| Dice Coefficient                         | 0.898   |
| Jaccard Coefficient                      | 0.816   |
| Hausdorff Distance (mm)                  | 12.806  |
| Average Displacement (mm)                | 1.601   |
| Sensitivity (Recall, true positive rate) | 0.876   |
| Specificity (true negative rate)         | 0.998   |

Normalized T1

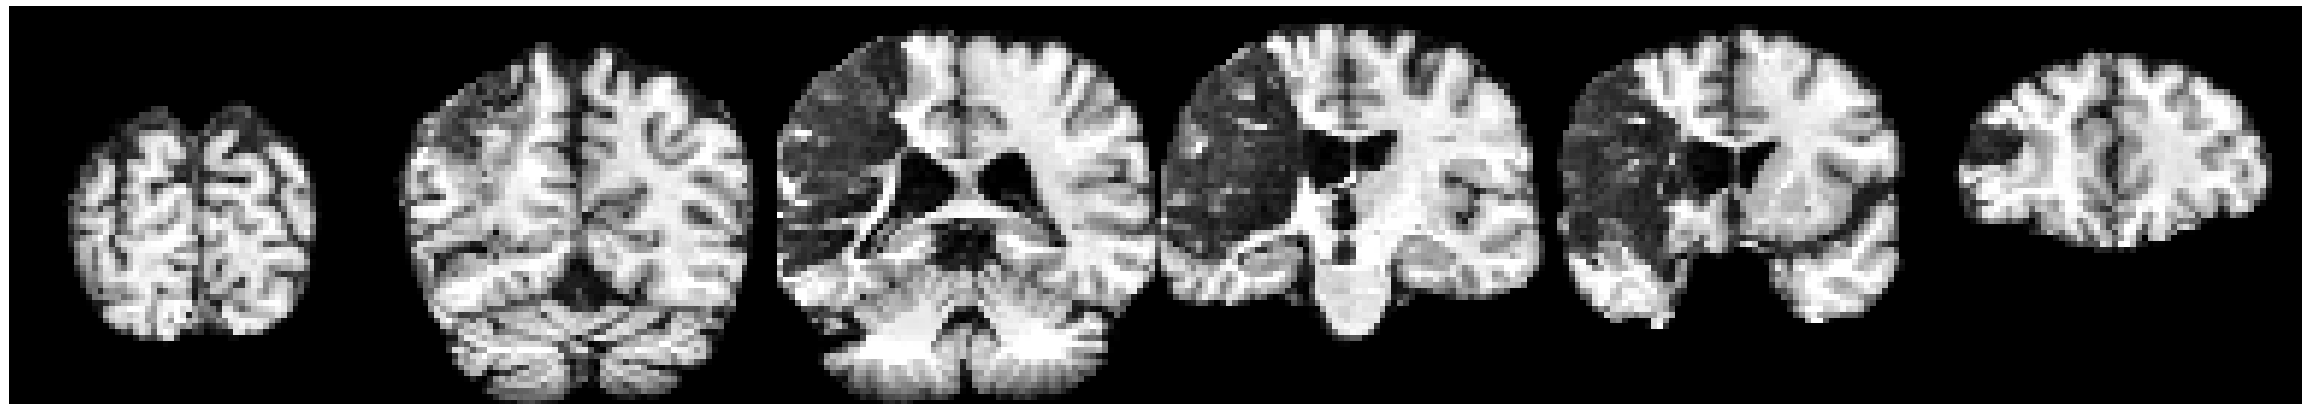

Lesion Overlay

red = Manual Tracing  
blue = LINDA prediction

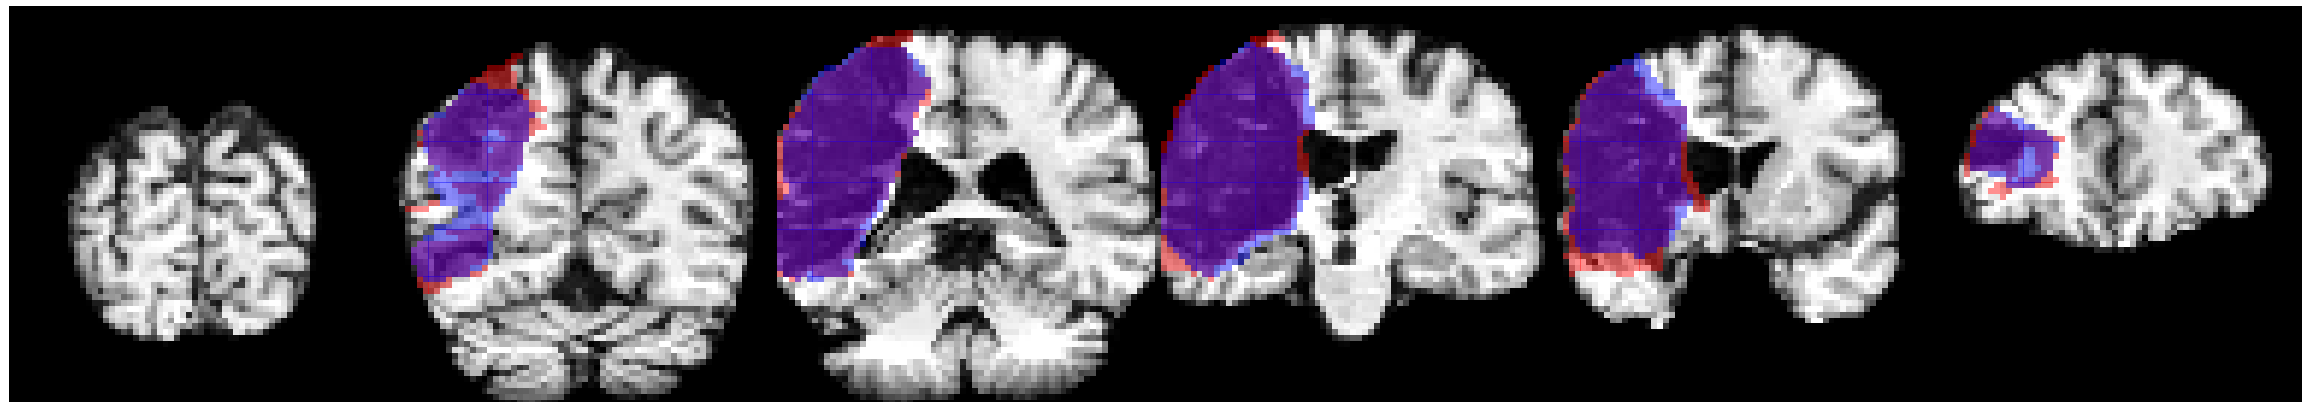

# Subject 11 – MR0874

|                                          | Value   |
|------------------------------------------|---------|
| Lesion Volume (ml)                       | 174.712 |
| Dice Coefficient                         | 0.672   |
| Jaccard Coefficient                      | 0.506   |
| Hausdorff Distance (mm)                  | 24.166  |
| Average Displacement (mm)                | 3.597   |
| Sensitivity (Recall, true positive rate) | 0.612   |
| Specificity (true negative rate)         | 0.995   |

Normalized T1

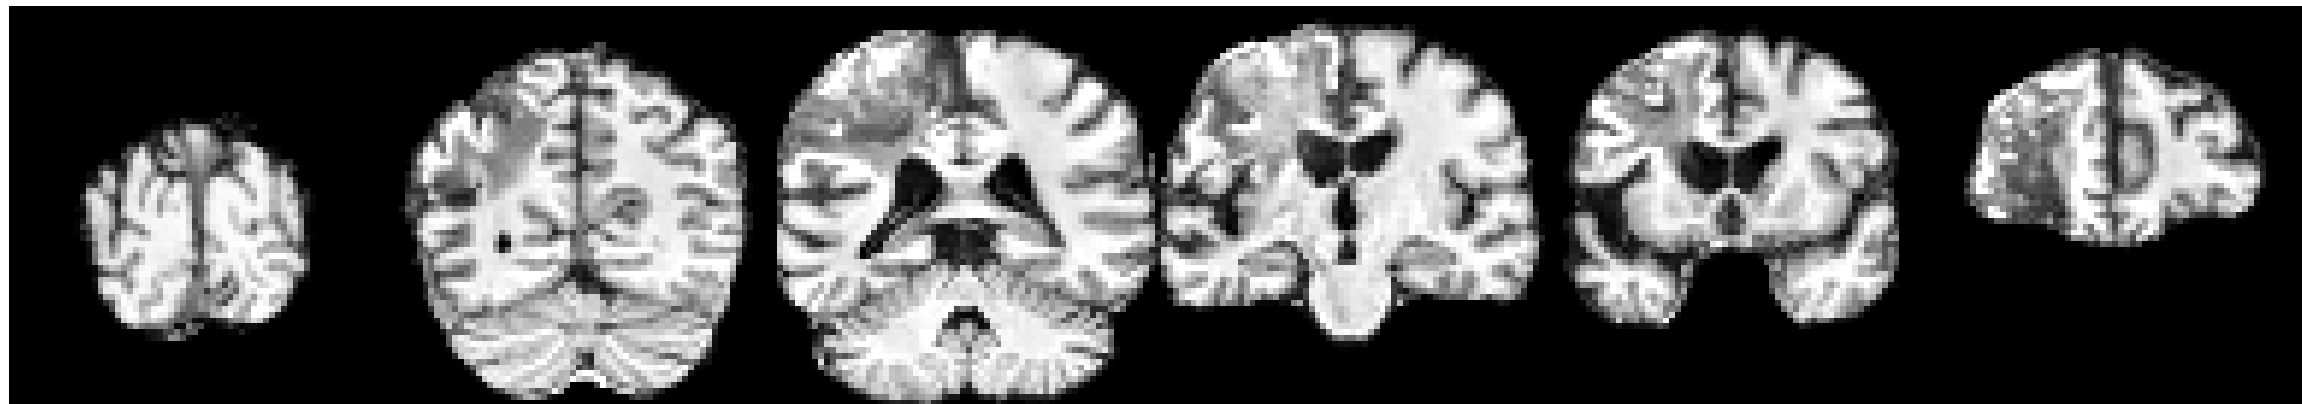

Lesion Overlay

red = Manual Tracing  
blue = LINDA prediction

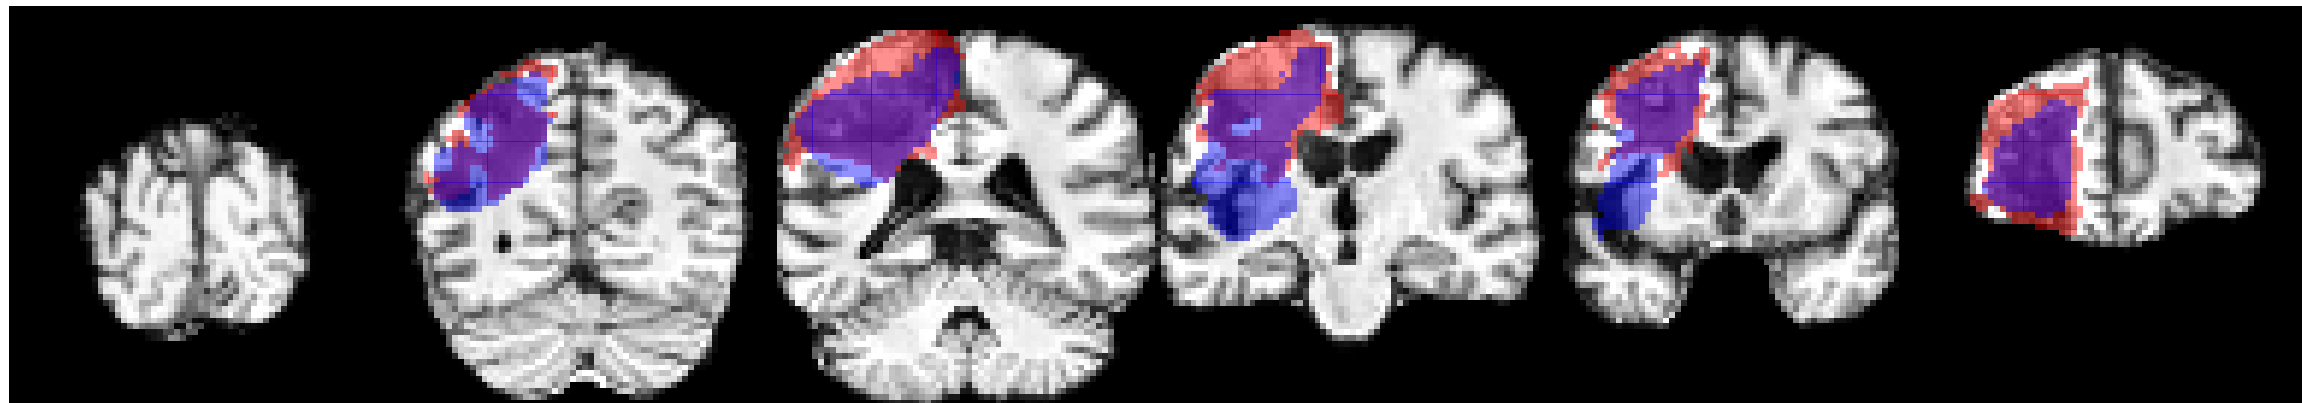

## Subject 12 – MR1039

|                                          | Value  |
|------------------------------------------|--------|
| Lesion Volume (ml)                       | 25.48  |
| Dice Coefficient                         | 0.652  |
| Jaccard Coefficient                      | 0.484  |
| Hausdorff Distance (mm)                  | 23.495 |
| Average Displacement (mm)                | 2.718  |
| Sensitivity (Recall, true positive rate) | 0.78   |
| Specificity (true negative rate)         | 0.998  |

Normalized T1

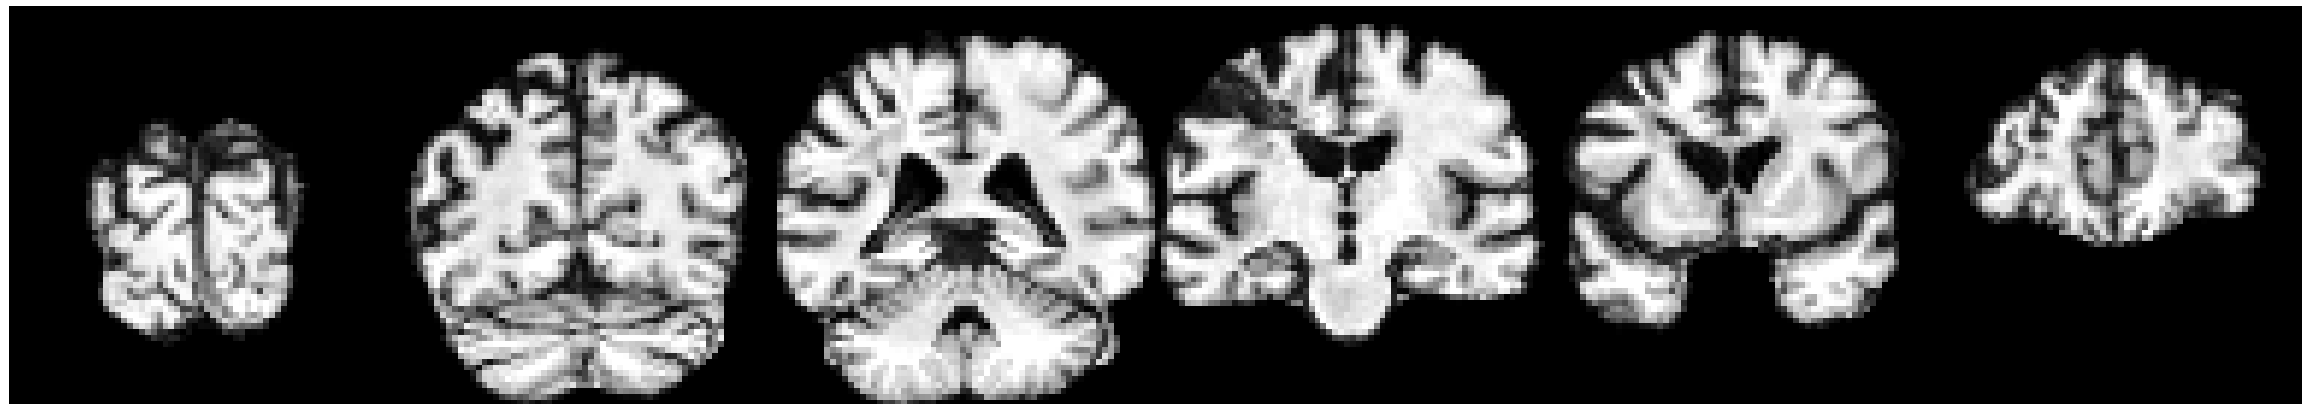

Lesion Overlay

red = Manual Tracing  
blue = LINDA prediction

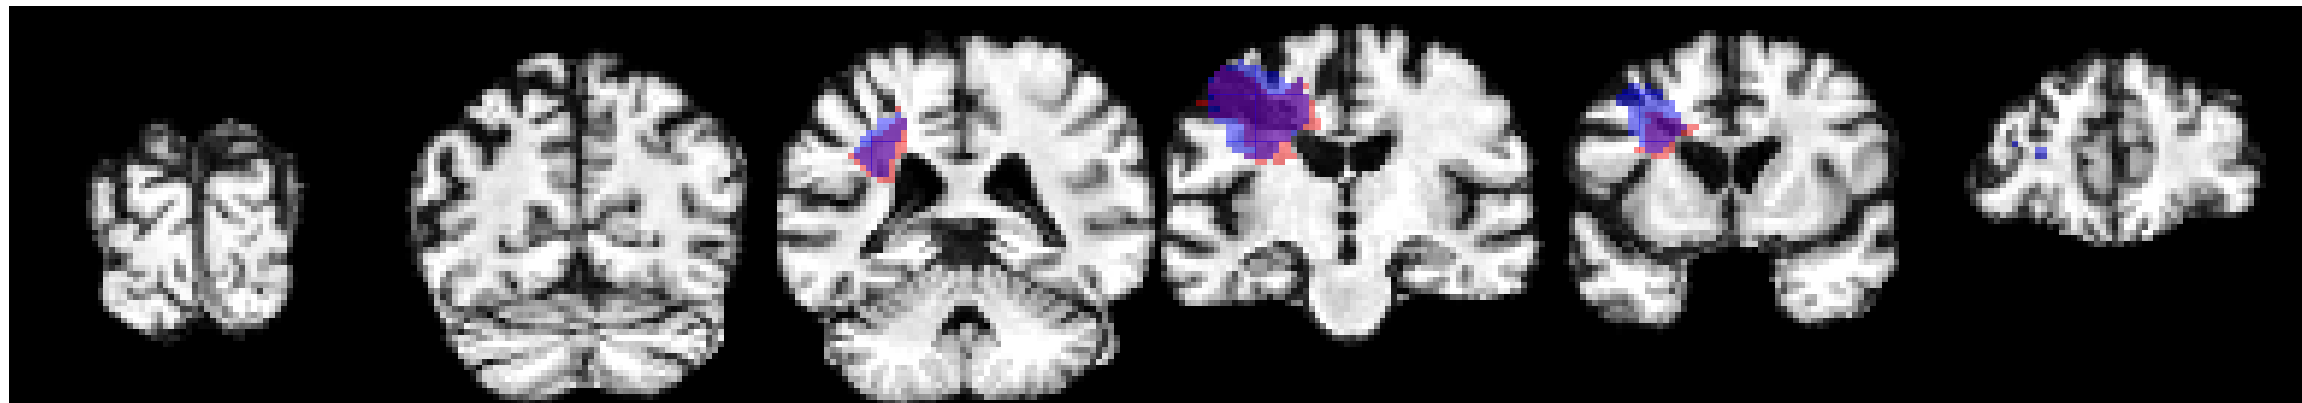

# Subject 13 – MR1185

|                                          | Value  |
|------------------------------------------|--------|
| Lesion Volume (ml)                       | 56.008 |
| Dice Coefficient                         | 0.603  |
| Jaccard Coefficient                      | 0.432  |
| Hausdorff Distance (mm)                  | 13.267 |
| Average Displacement (mm)                | 3.141  |
| Sensitivity (Recall, true positive rate) | 0.449  |
| Specificity (true negative rate)         | 1      |

Normalized T1

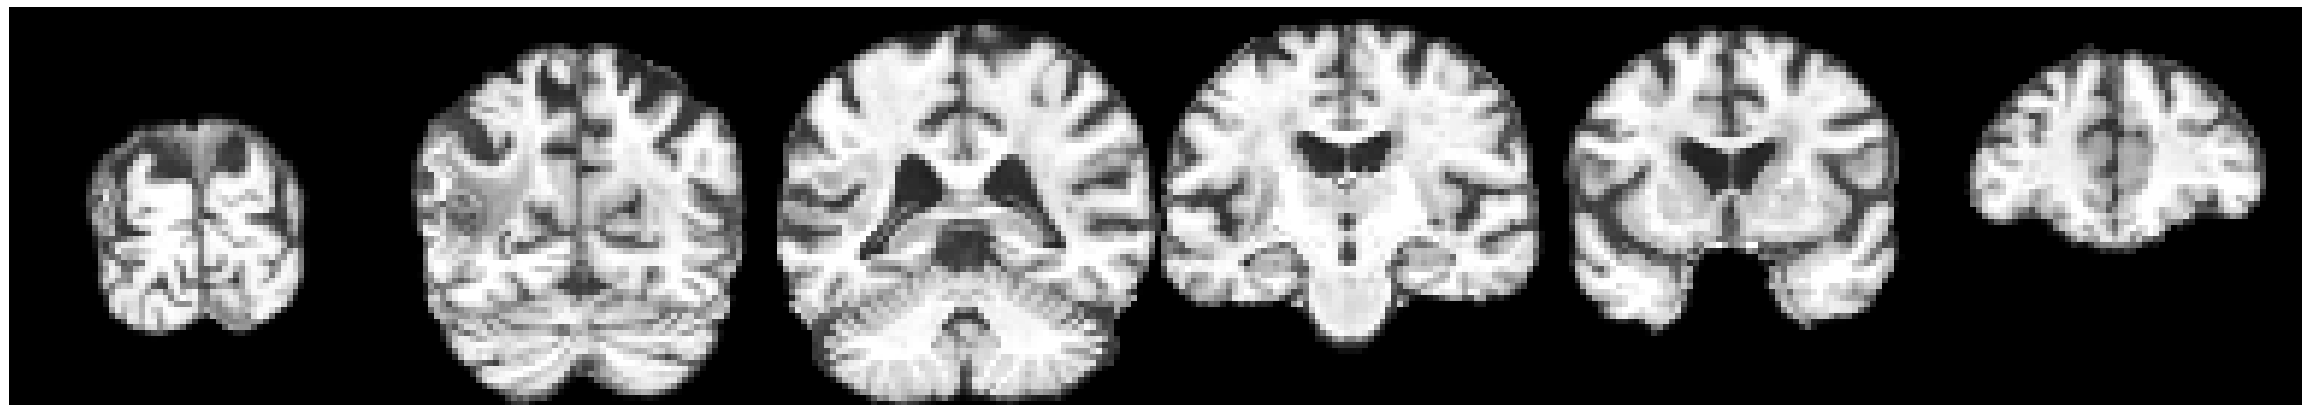

Lesion Overlay

red = Manual Tracing  
blue = LINDA prediction

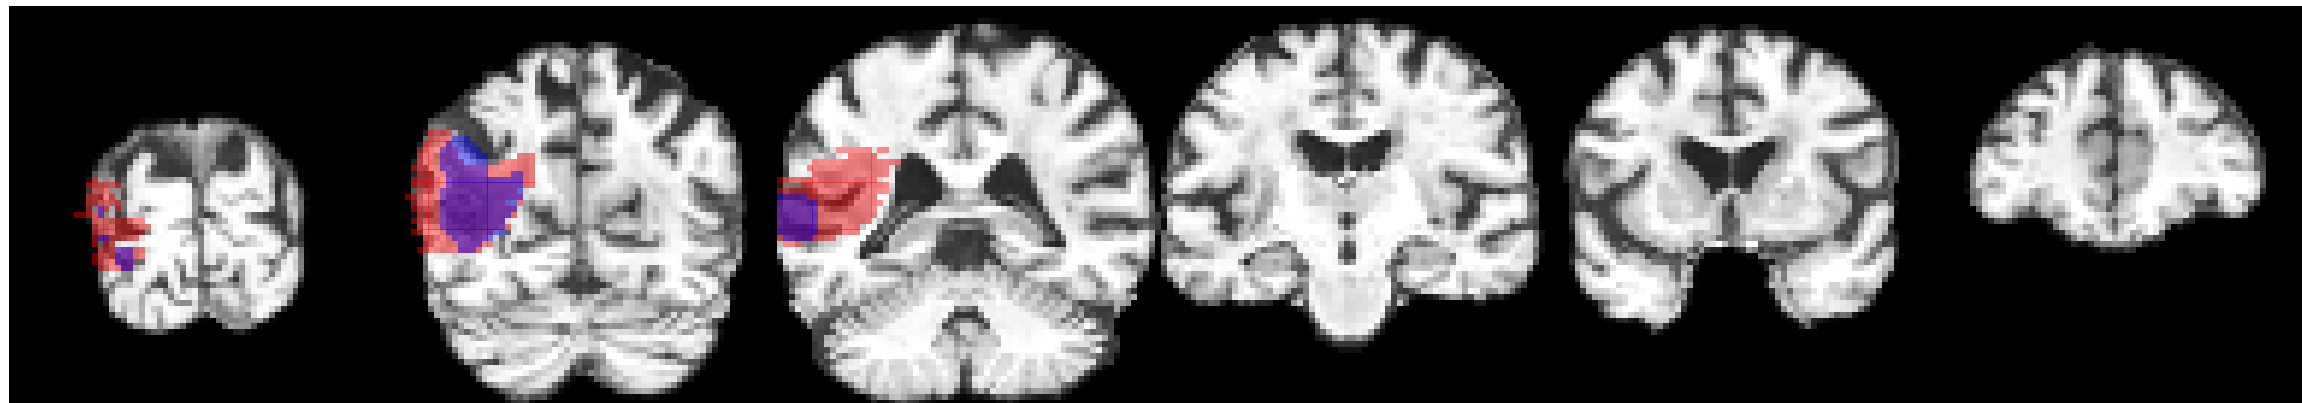

# Subject 14 – MR1229

|                                          | Value  |
|------------------------------------------|--------|
| Lesion Volume (ml)                       | 12.608 |
| Dice Coefficient                         | 0.694  |
| Jaccard Coefficient                      | 0.532  |
| Hausdorff Distance (mm)                  | 12     |
| Average Displacement (mm)                | 1.808  |
| Sensitivity (Recall, true positive rate) | 0.846  |
| Specificity (true negative rate)         | 0.999  |

Normalized T1

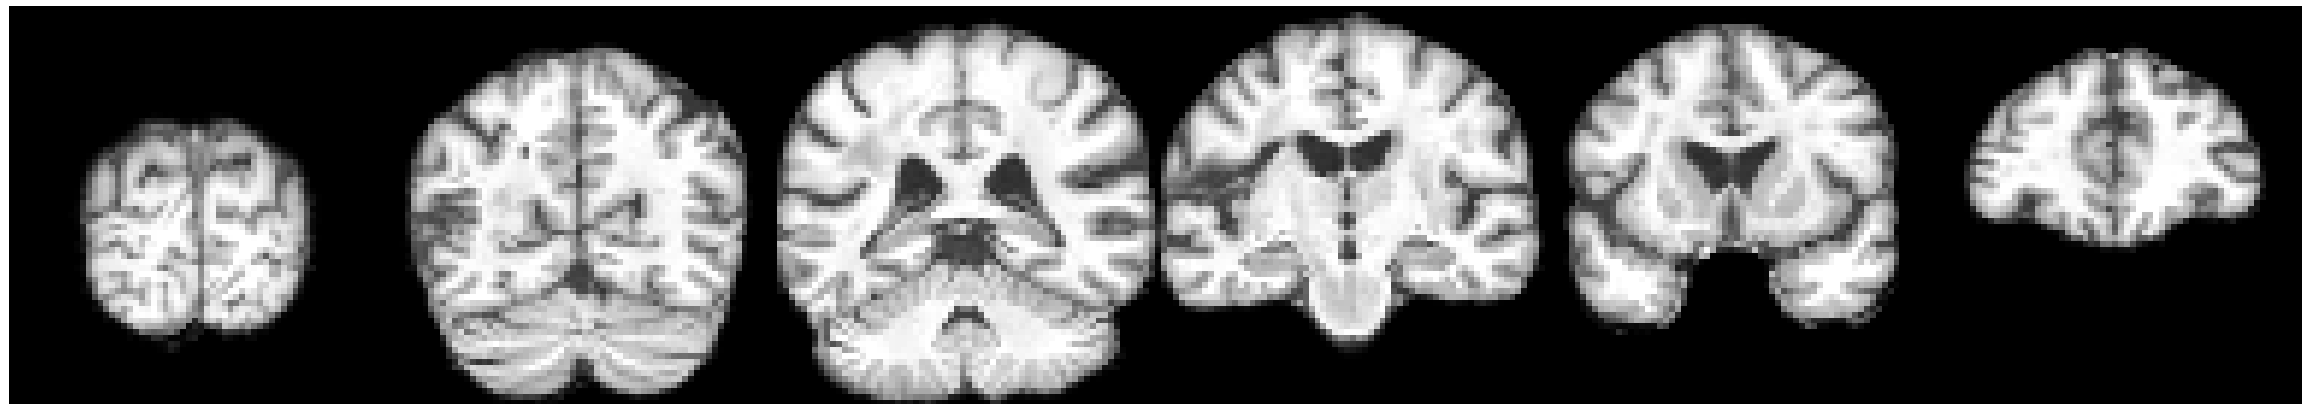

Lesion Overlay

red = Manual Tracing  
blue = LINDA prediction

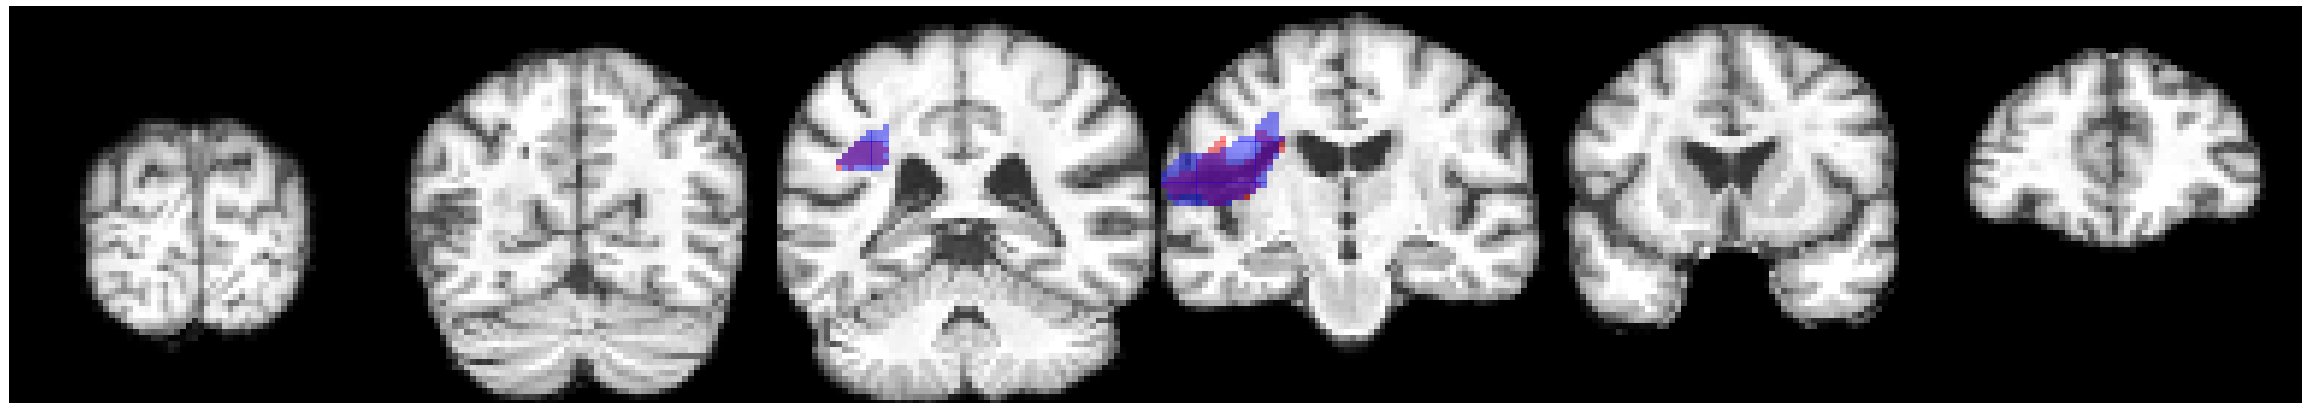

# Subject 15 – MR1230

|                                          | Value  |
|------------------------------------------|--------|
| Lesion Volume (ml)                       | 17.456 |
| Dice Coefficient                         | 0.614  |
| Jaccard Coefficient                      | 0.443  |
| Hausdorff Distance (mm)                  | 24.495 |
| Average Displacement (mm)                | 2.173  |
| Sensitivity (Recall, true positive rate) | 0.567  |
| Specificity (true negative rate)         | 0.999  |

Normalized T1

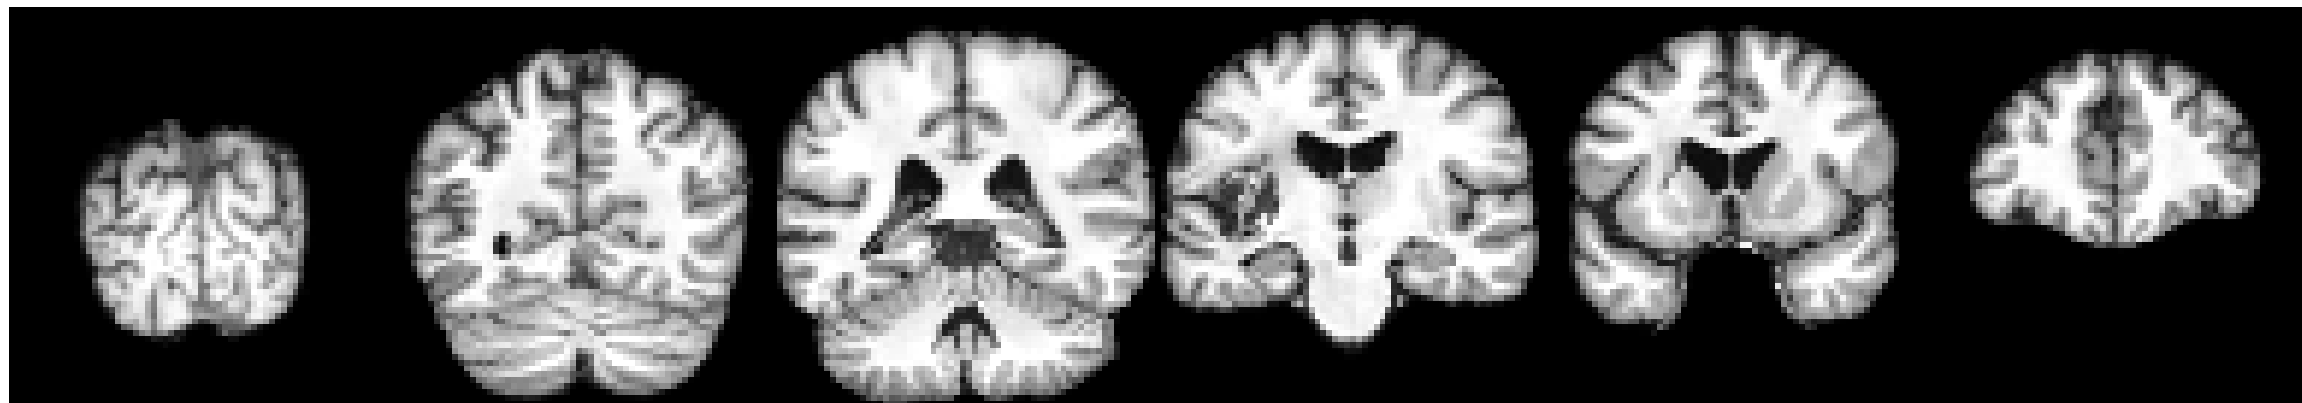

Lesion Overlay

red = Manual Tracing  
blue = LINDA prediction

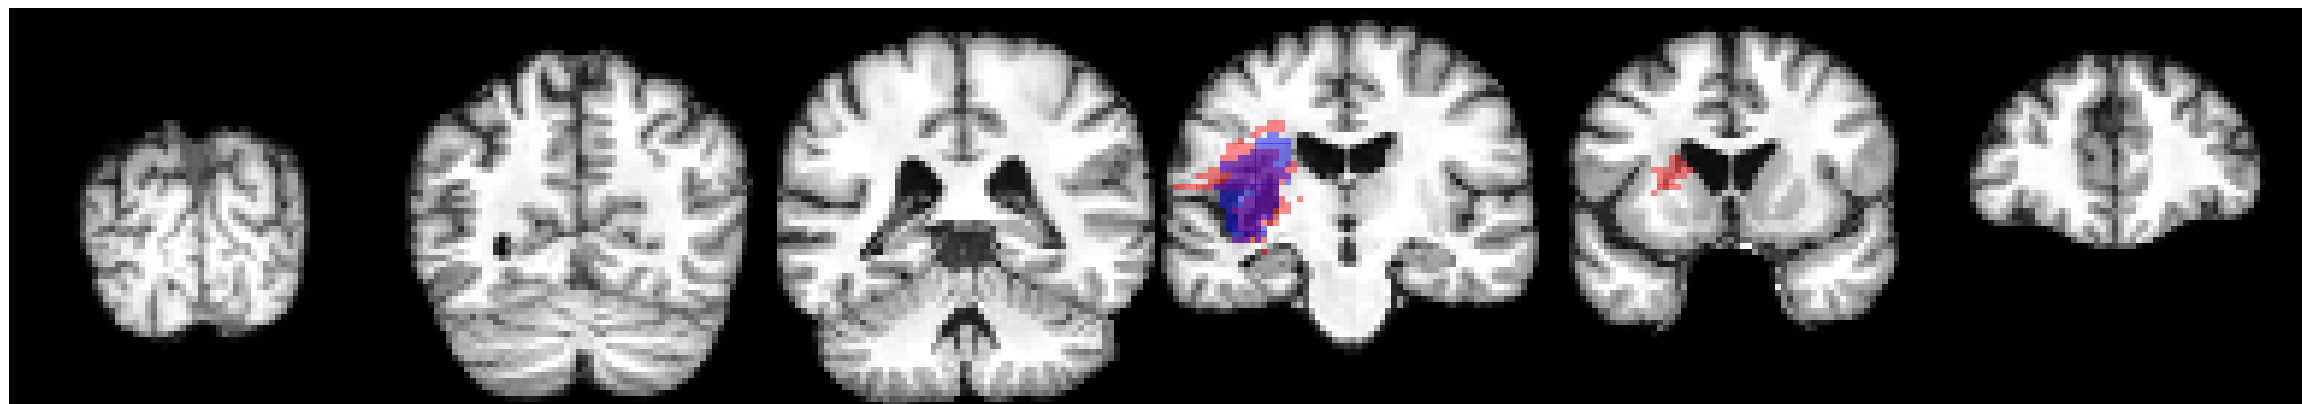

# Subject 16 – MR1238

|                                          | Value  |
|------------------------------------------|--------|
| Lesion Volume (ml)                       | 111.28 |
| Dice Coefficient                         | 0.908  |
| Jaccard Coefficient                      | 0.832  |
| Hausdorff Distance (mm)                  | 10.392 |
| Average Displacement (mm)                | 1.145  |
| Sensitivity (Recall, true positive rate) | 0.926  |
| Specificity (true negative rate)         | 0.998  |

Normalized T1

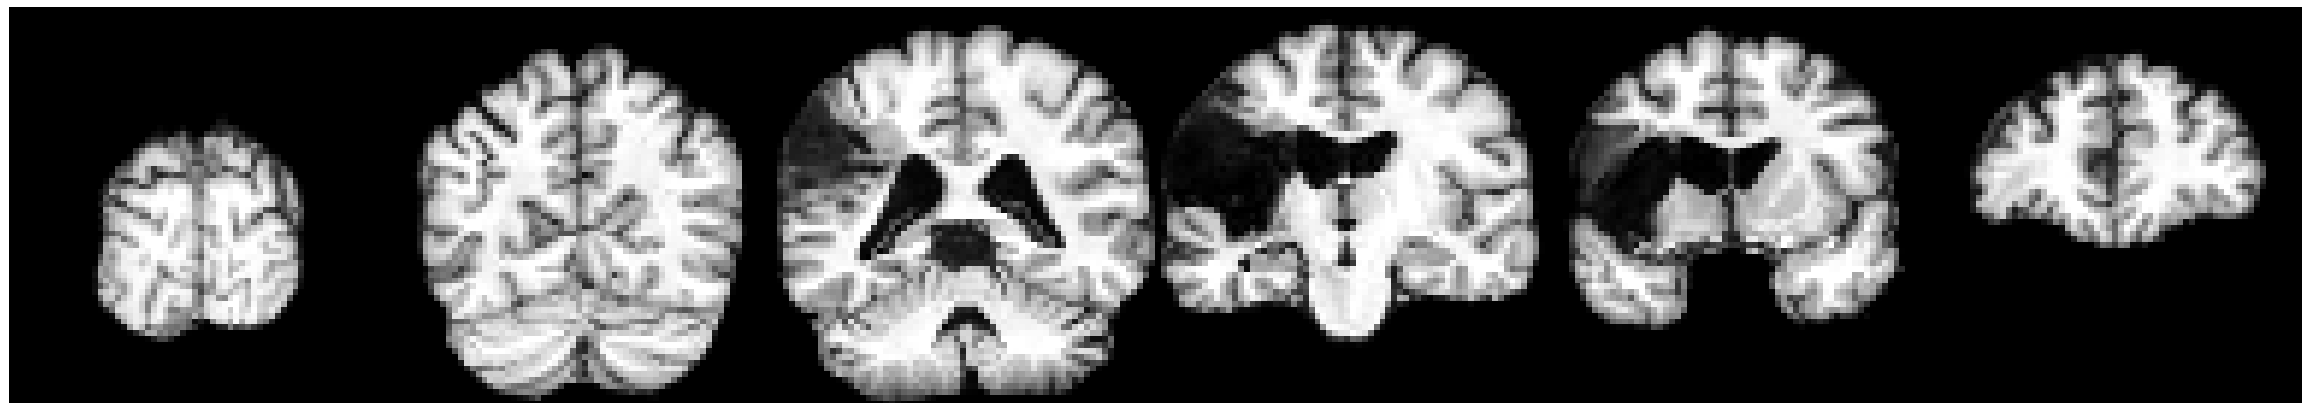

Lesion Overlay

red = Manual Tracing  
blue = LINDA prediction

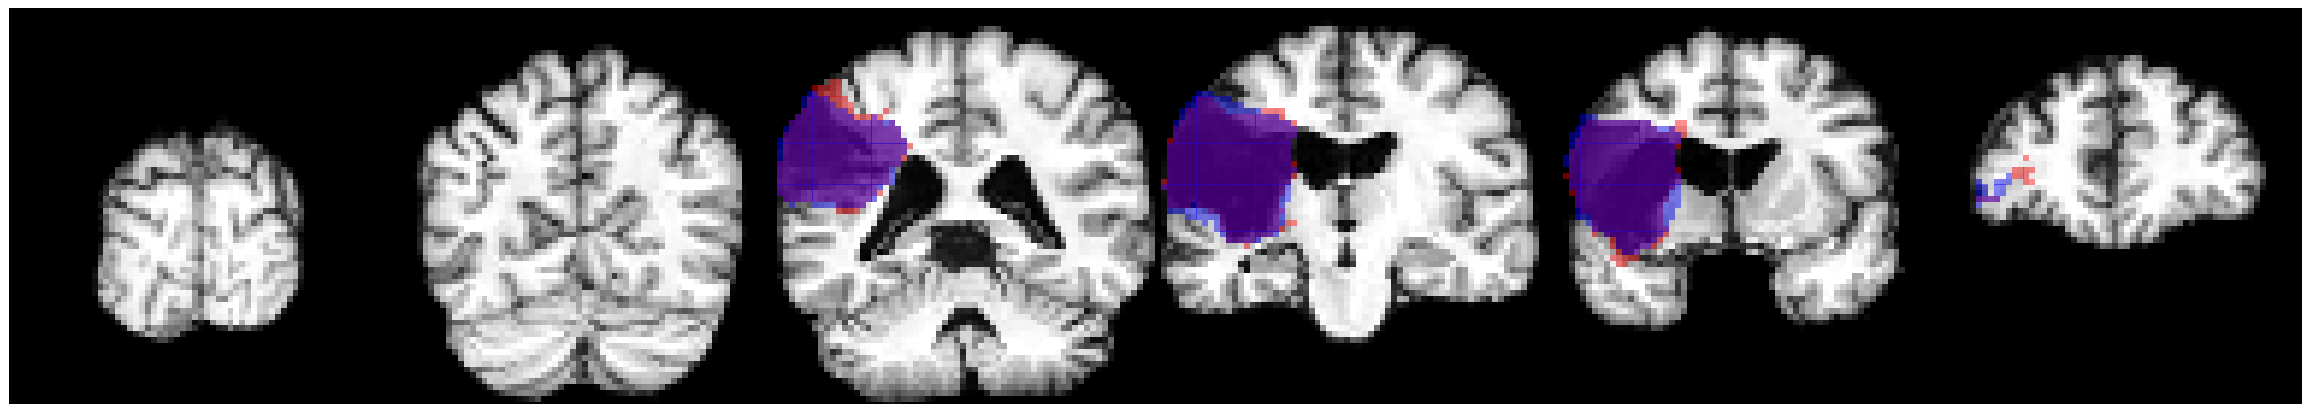



# Subject 17 – MR1347

|                                          | Value  |
|------------------------------------------|--------|
| Lesion Volume (ml)                       | 9.92   |
| Dice Coefficient                         | 0.452  |
| Jaccard Coefficient                      | 0.292  |
| Hausdorff Distance (mm)                  | 20.396 |
| Average Displacement (mm)                | 2.763  |
| Sensitivity (Recall, true positive rate) | 0.338  |
| Specificity (true negative rate)         | 1      |

Normalized T1

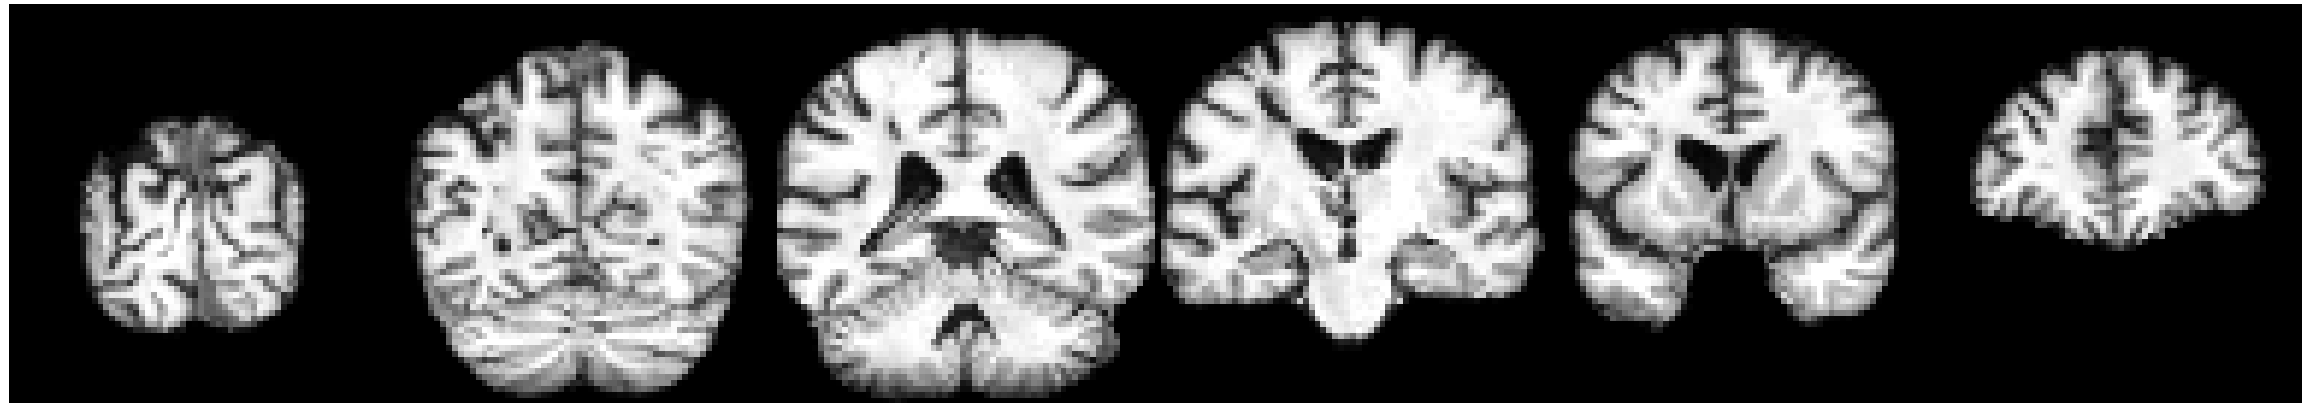

Lesion Overlay

red = Manual Tracing  
blue = LINDA prediction

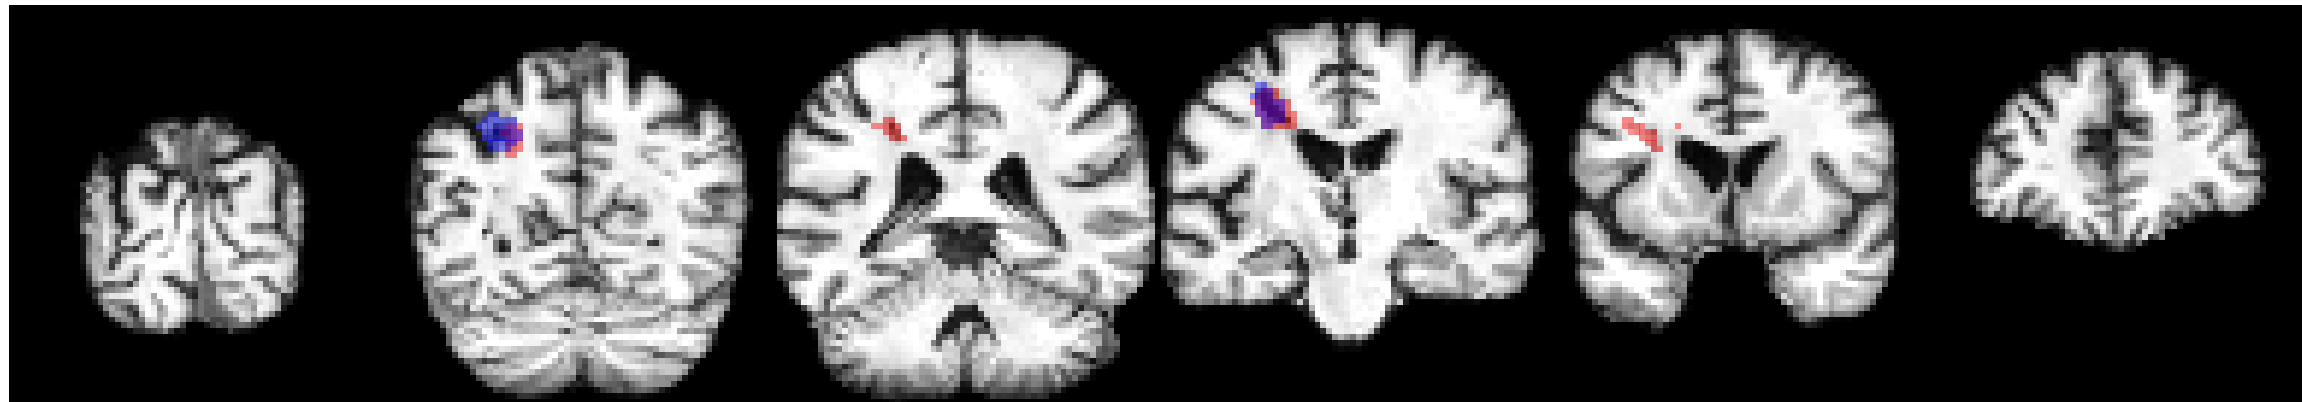

# Subject 18 – MR1371

|                                          | Value  |
|------------------------------------------|--------|
| Lesion Volume (ml)                       | 9.944  |
| Dice Coefficient                         | 0.578  |
| Jaccard Coefficient                      | 0.407  |
| Hausdorff Distance (mm)                  | 11.314 |
| Average Displacement (mm)                | 1.906  |
| Sensitivity (Recall, true positive rate) | 0.492  |
| Specificity (true negative rate)         | 1      |

Normalized T1

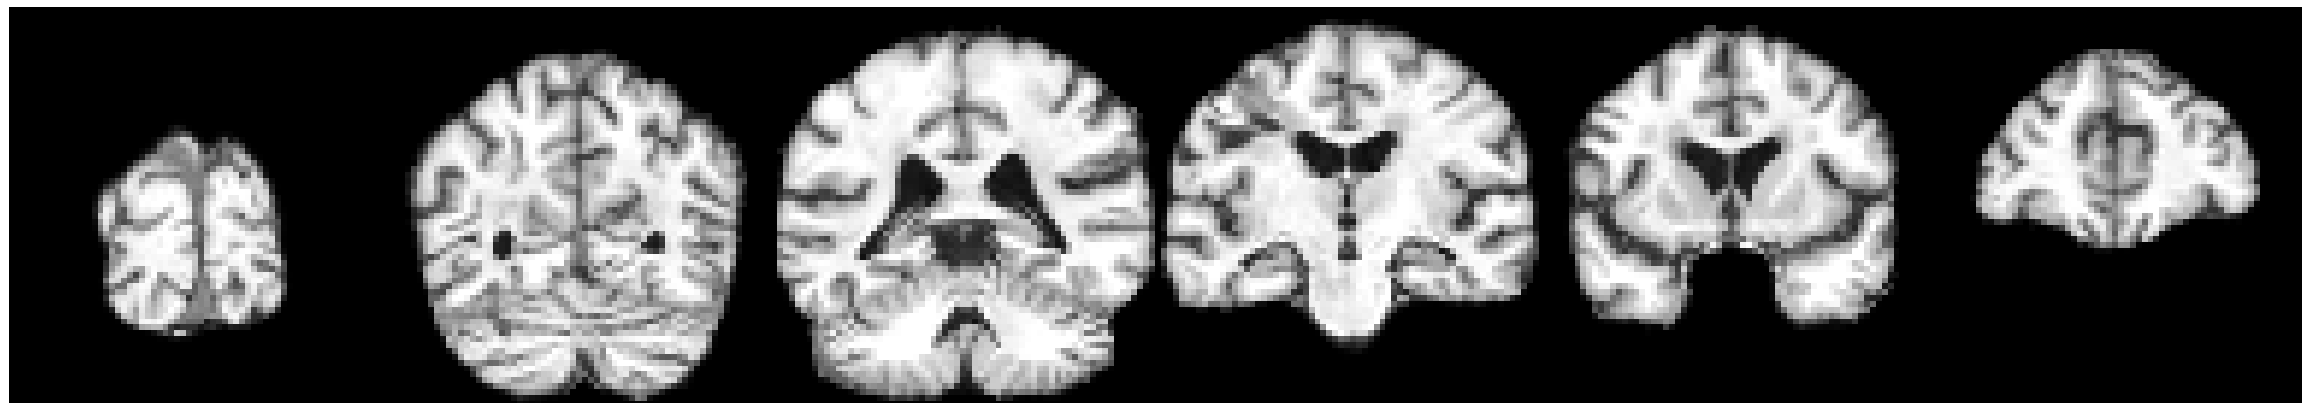

Lesion Overlay

red = Manual Tracing  
blue = LINDA prediction

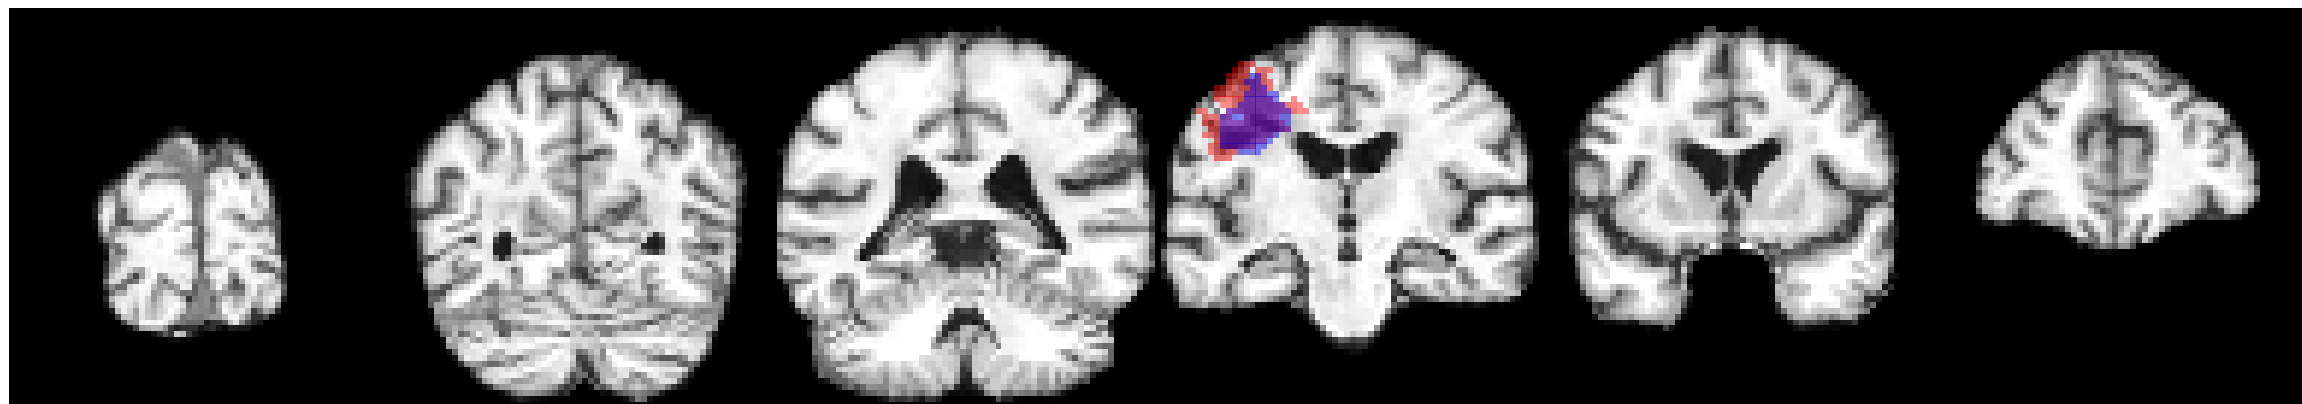

# Subject 19 – MR1380

|                                          | Value  |
|------------------------------------------|--------|
| Lesion Volume (ml)                       | 36.976 |
| Dice Coefficient                         | 0.771  |
| Jaccard Coefficient                      | 0.627  |
| Hausdorff Distance (mm)                  | 13.115 |
| Average Displacement (mm)                | 1.679  |
| Sensitivity (Recall, true positive rate) | 0.753  |
| Specificity (true negative rate)         | 0.999  |

Normalized T1

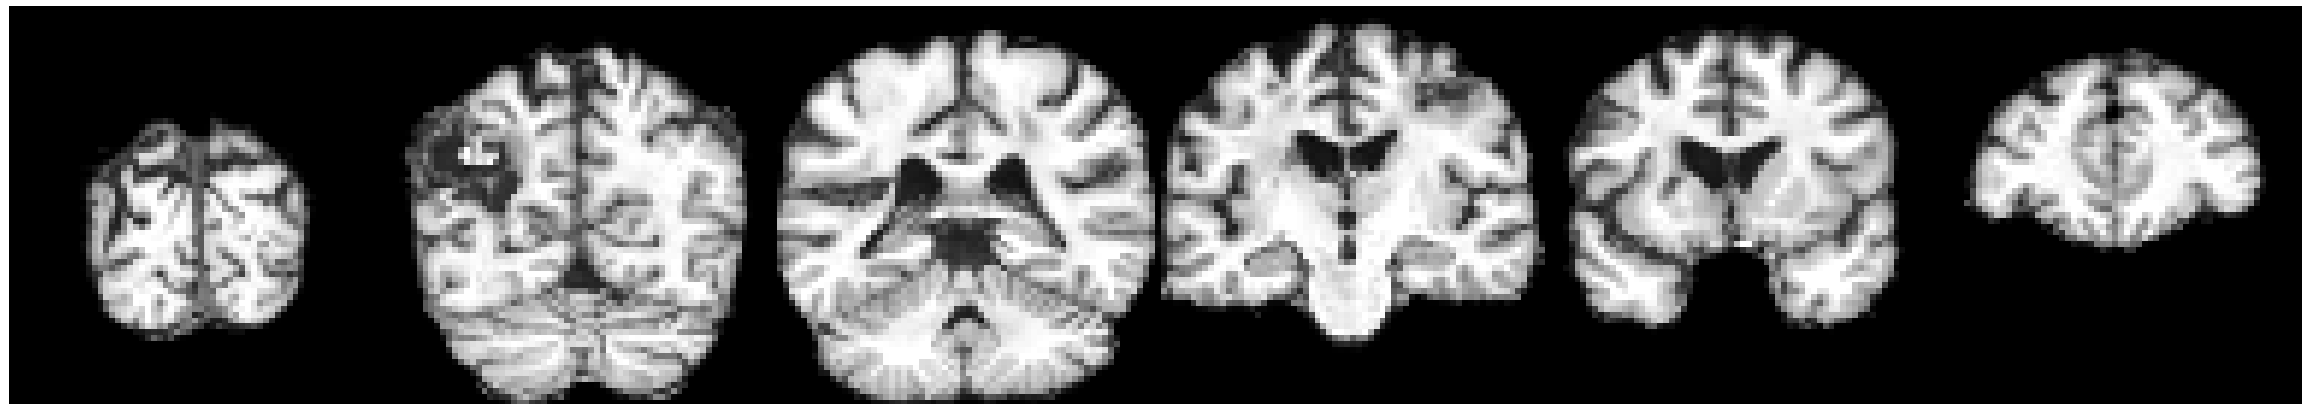

Lesion Overlay

red = Manual Tracing  
blue = LINDA prediction

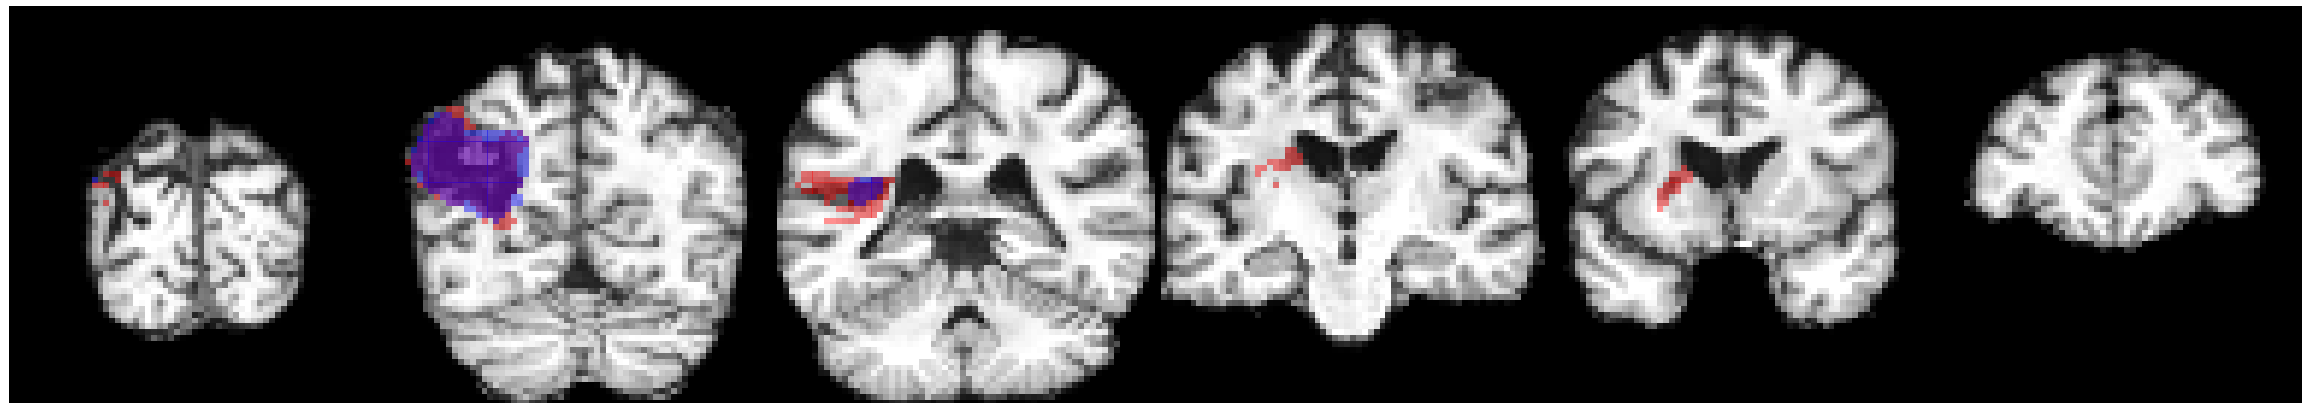

# Subject 20 – MR1392

|                                          | Value  |
|------------------------------------------|--------|
| Lesion Volume (ml)                       | 49.688 |
| Dice Coefficient                         | 0.582  |
| Jaccard Coefficient                      | 0.41   |
| Hausdorff Distance (mm)                  | 24.495 |
| Average Displacement (mm)                | 2.927  |
| Sensitivity (Recall, true positive rate) | 0.563  |
| Specificity (true negative rate)         | 0.998  |

Normalized T1

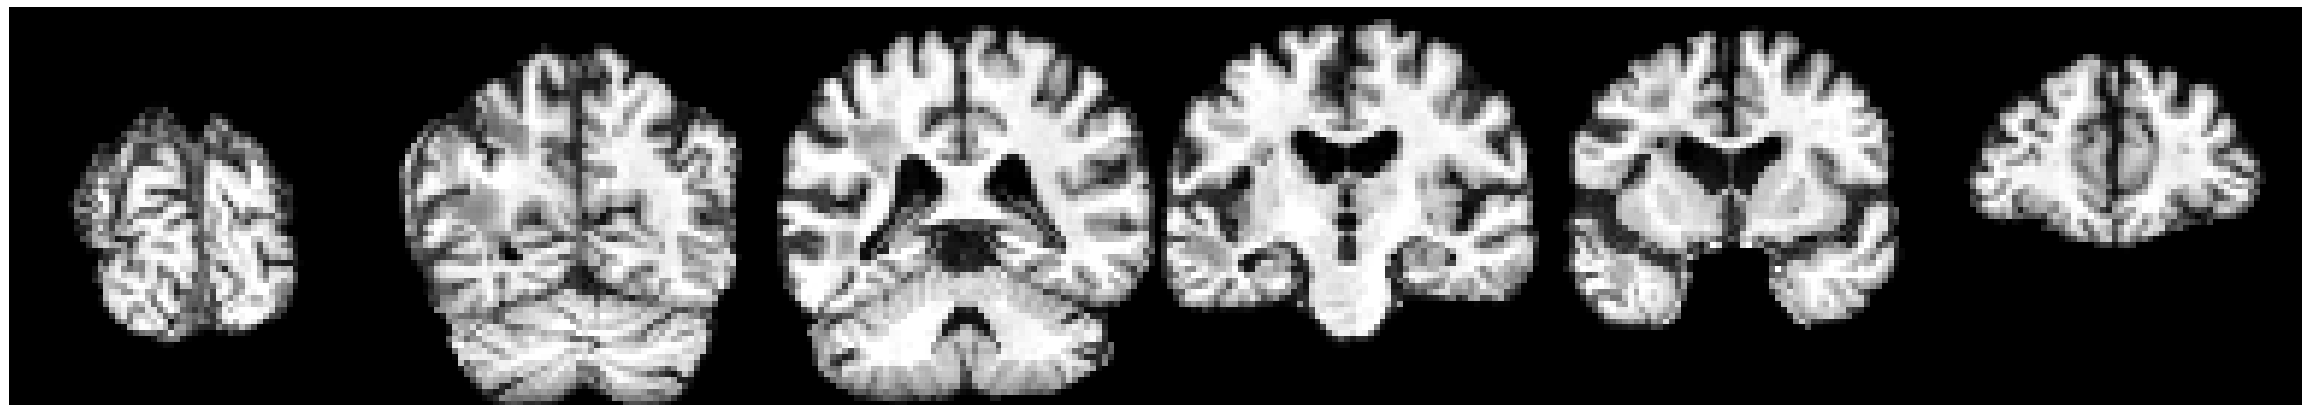

Lesion Overlay

red = Manual Tracing  
blue = LINDA prediction

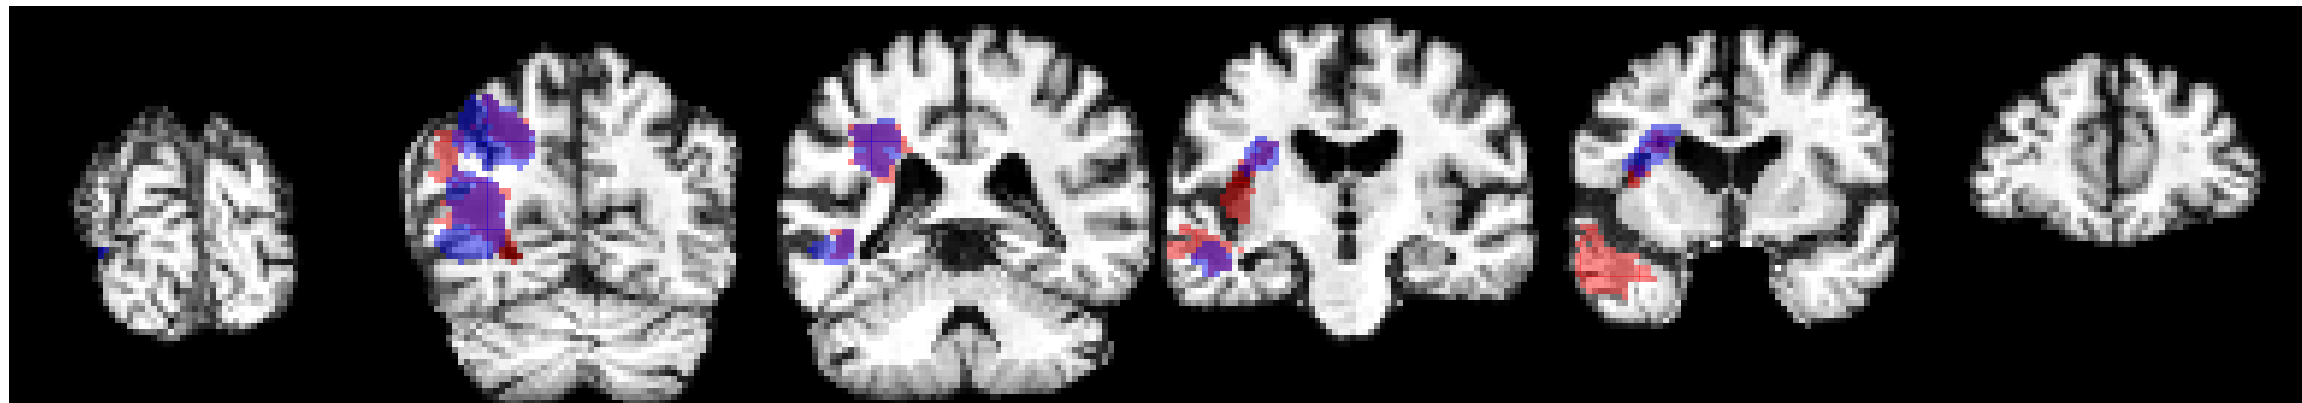

## Subject 21 – MR1510

|                                          | Value   |
|------------------------------------------|---------|
| Lesion Volume (ml)                       | 156.904 |
| Dice Coefficient                         | 0.807   |
| Jaccard Coefficient                      | 0.677   |
| Hausdorff Distance (mm)                  | 12.806  |
| Average Displacement (mm)                | 2.106   |
| Sensitivity (Recall, true positive rate) | 0.745   |
| Specificity (true negative rate)         | 0.998   |

Normalized T1

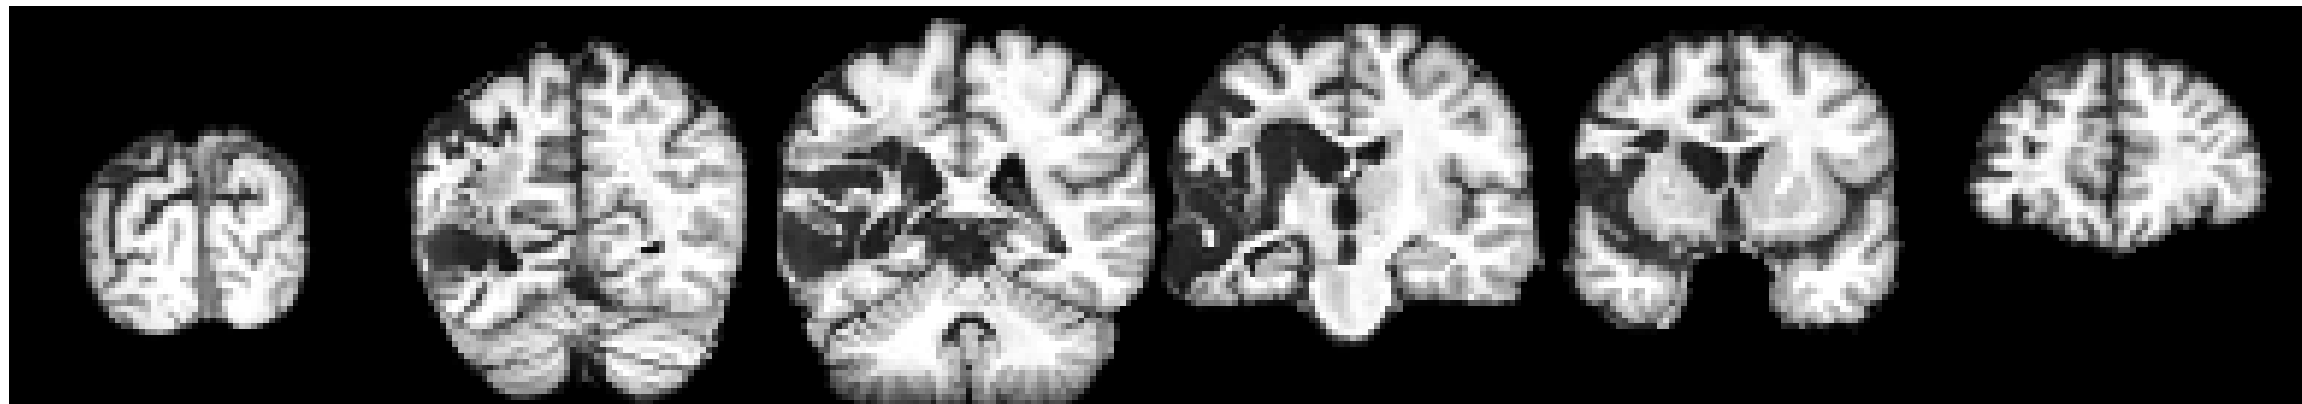

Lesion Overlay

red = Manual Tracing  
blue = LINDA prediction

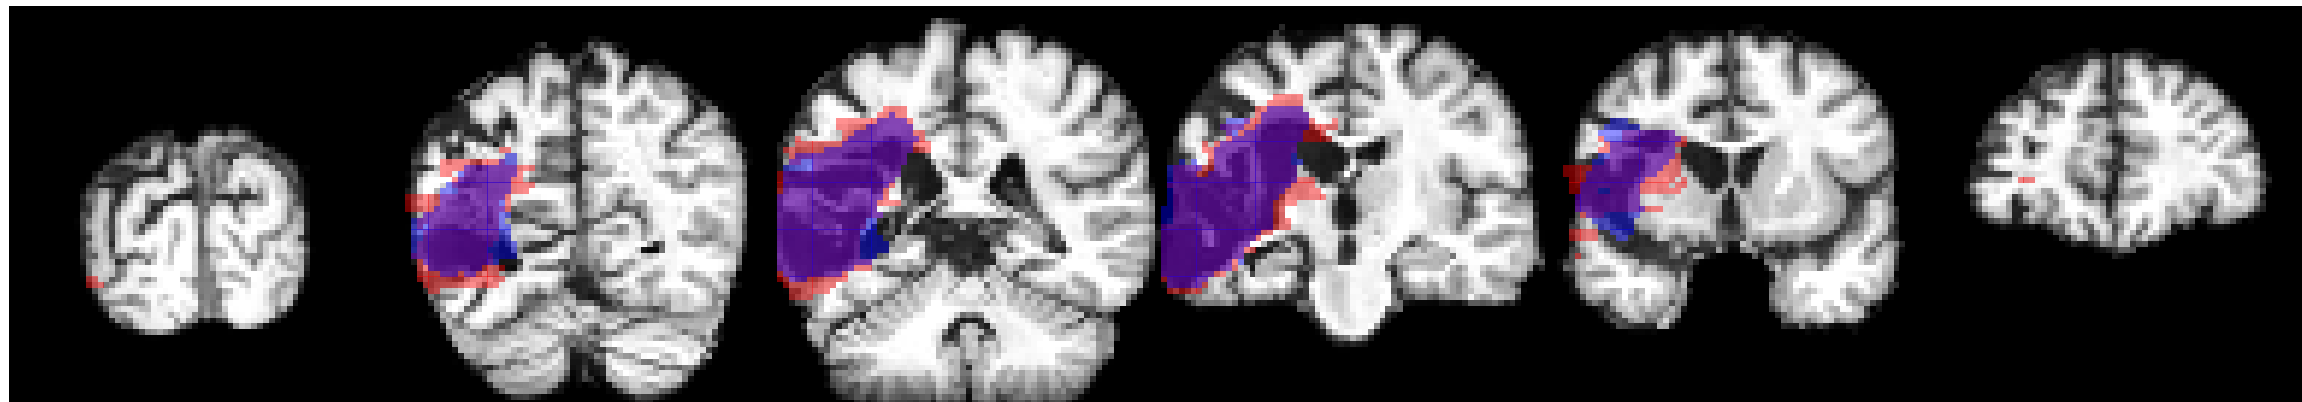

# Subject 22 – MR1587

|                                          | Value  |
|------------------------------------------|--------|
| Lesion Volume (ml)                       | 70.36  |
| Dice Coefficient                         | 0.838  |
| Jaccard Coefficient                      | 0.721  |
| Hausdorff Distance (mm)                  | 16.125 |
| Average Displacement (mm)                | 1.507  |
| Sensitivity (Recall, true positive rate) | 0.904  |
| Specificity (true negative rate)         | 0.998  |

Normalized T1

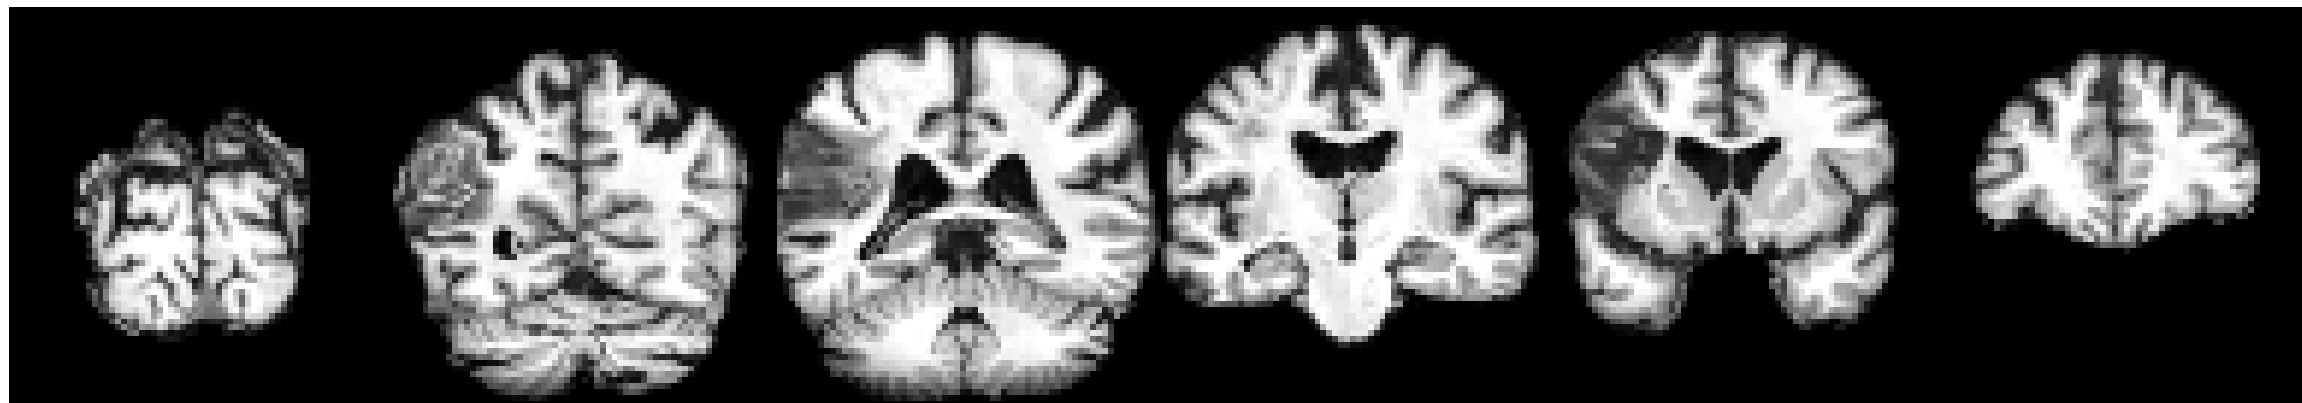

Lesion Overlay

red = Manual Tracing  
blue = LINDA prediction

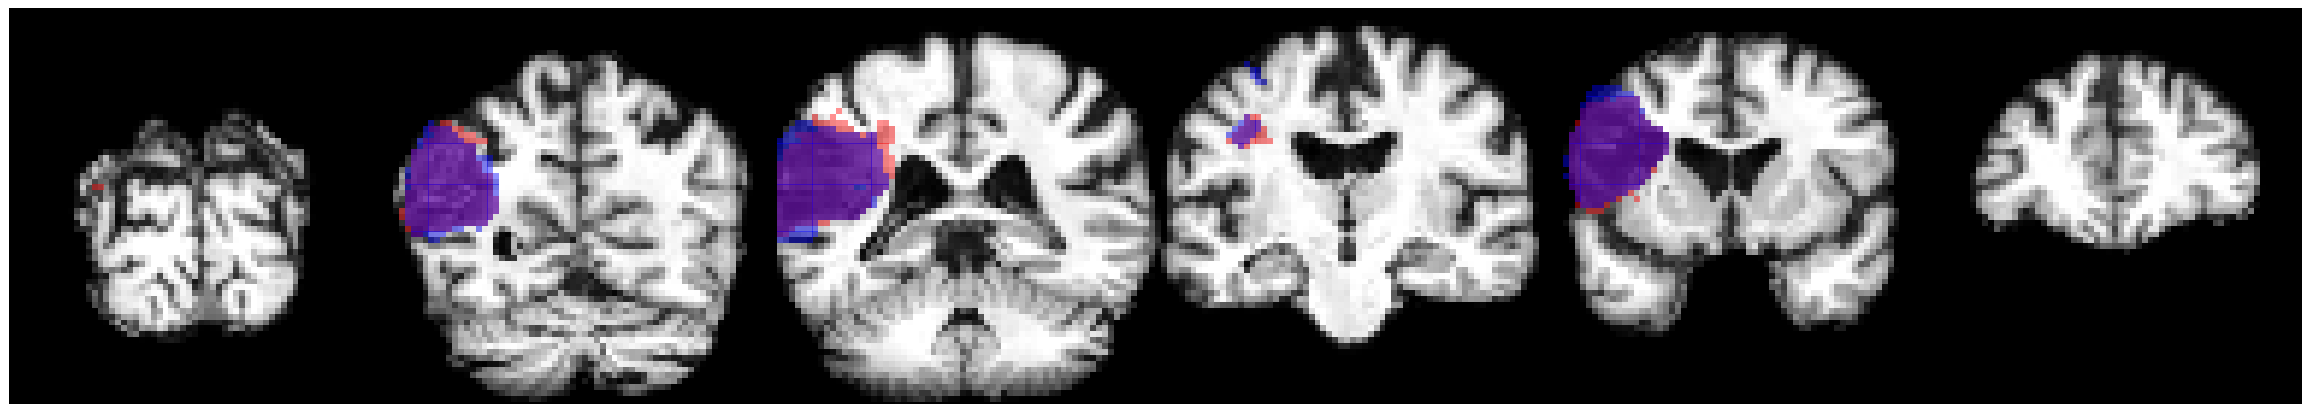

# Subject 23 – MR1619

|                                          | Value  |
|------------------------------------------|--------|
| Lesion Volume (ml)                       | 5.224  |
| Dice Coefficient                         | 0.316  |
| Jaccard Coefficient                      | 0.187  |
| Hausdorff Distance (mm)                  | 21.354 |
| Average Displacement (mm)                | 4.363  |
| Sensitivity (Recall, true positive rate) | 0.844  |
| Specificity (true negative rate)         | 0.998  |

Normalized T1

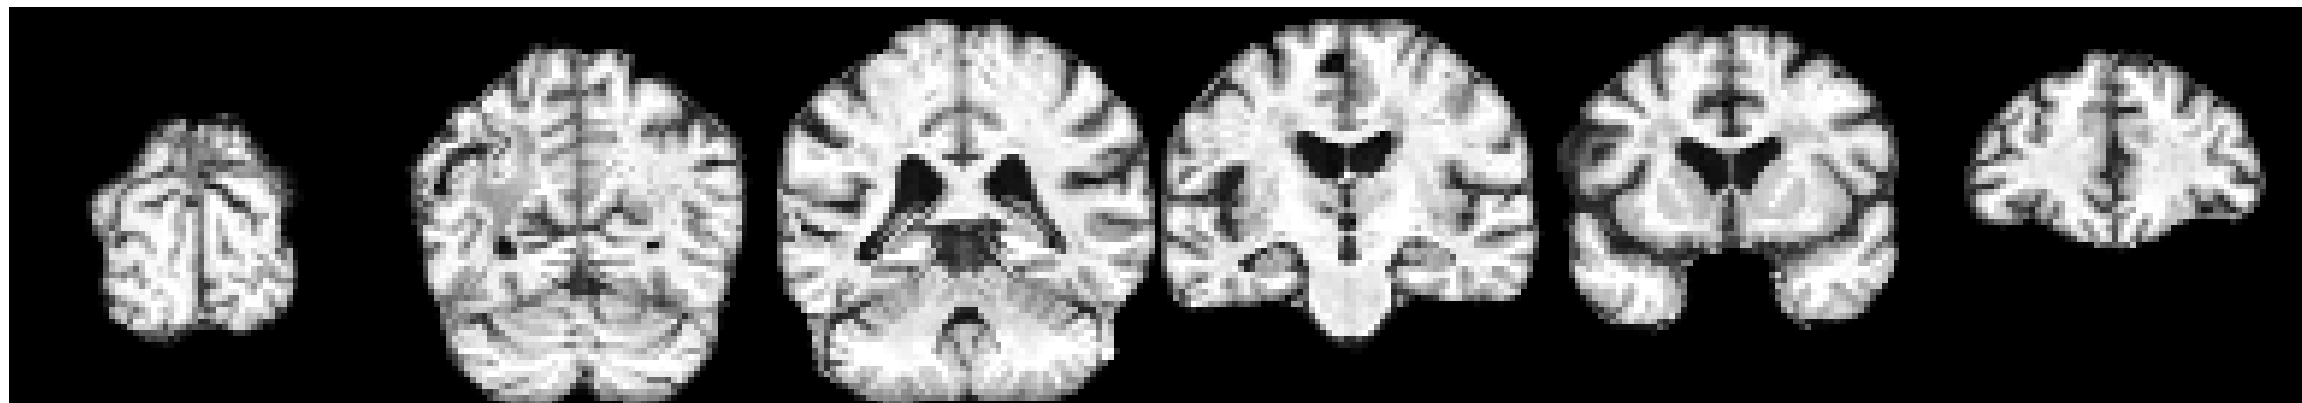

Lesion Overlay

red = Manual Tracing  
blue = LINDA prediction

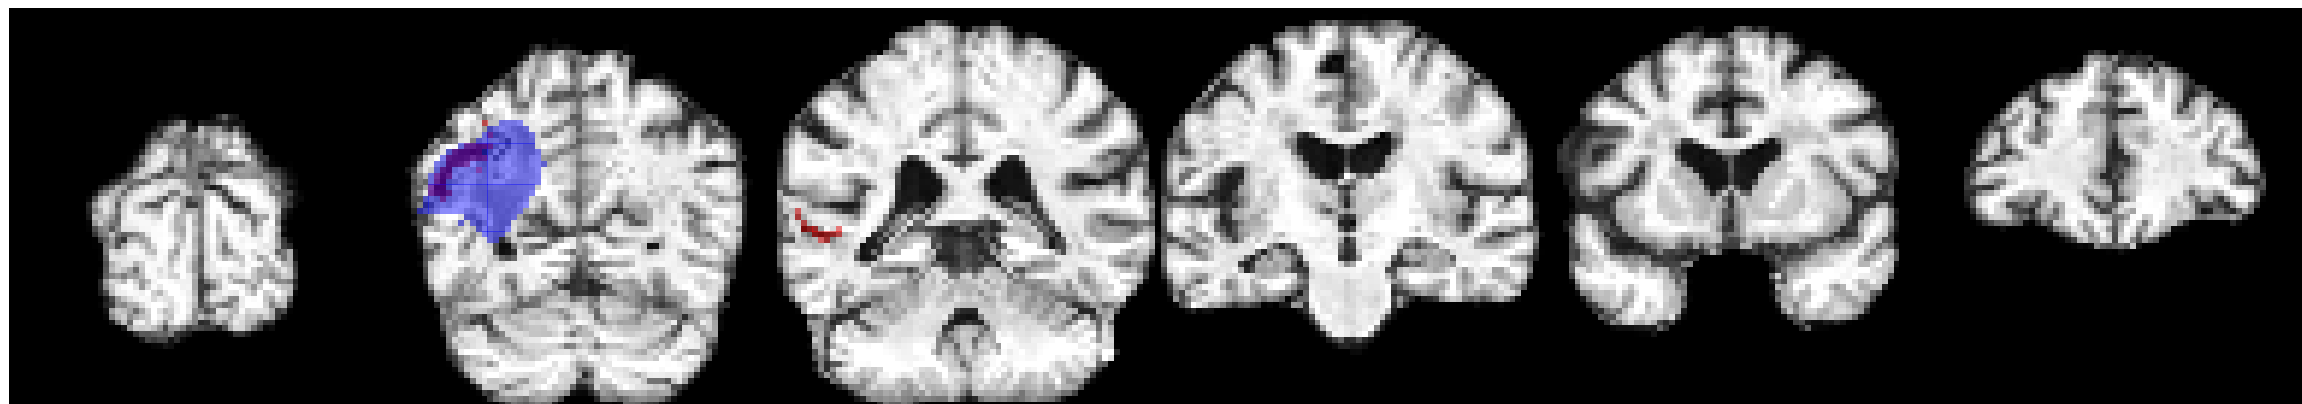

# Subject 24 – MR1635

|                                          | Value  |
|------------------------------------------|--------|
| Lesion Volume (ml)                       | 25.336 |
| Dice Coefficient                         | 0.714  |
| Jaccard Coefficient                      | 0.555  |
| Hausdorff Distance (mm)                  | 9.165  |
| Average Displacement (mm)                | 2.185  |
| Sensitivity (Recall, true positive rate) | 0.884  |
| Specificity (true negative rate)         | 0.998  |

Normalized T1

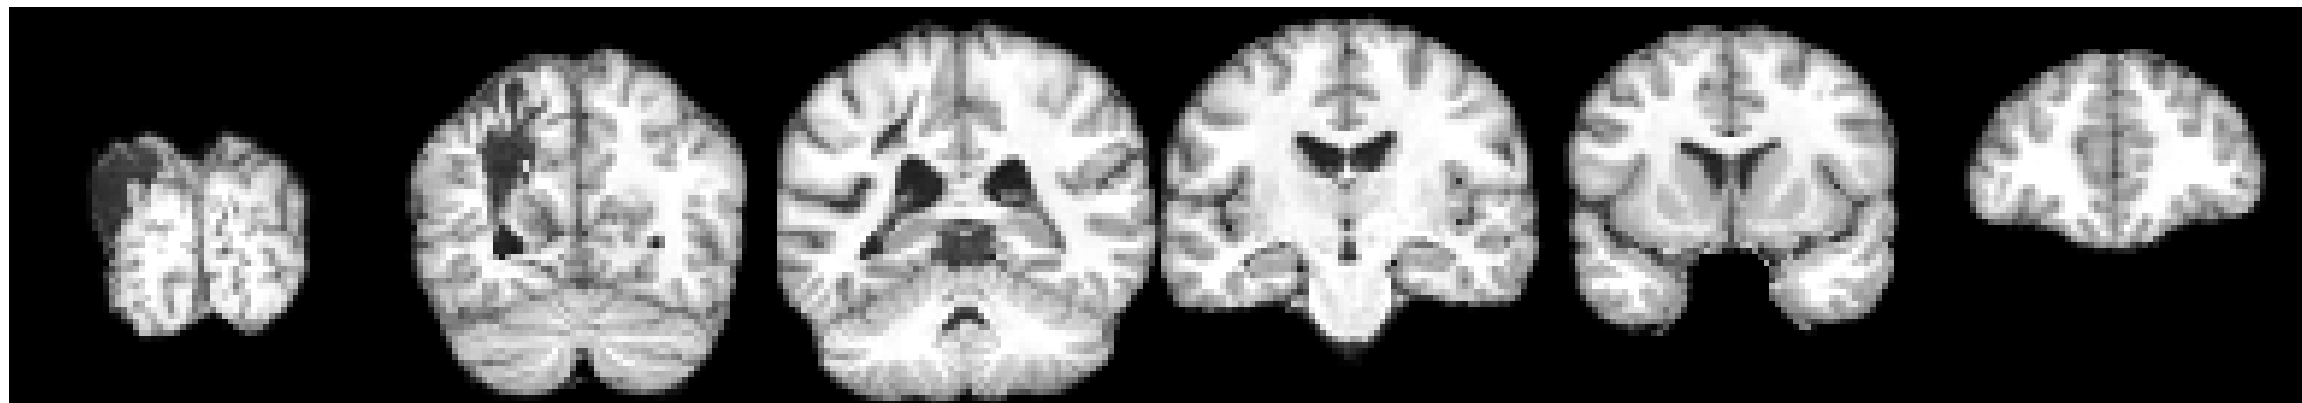

Lesion Overlay

red = Manual Tracing  
blue = LINDA prediction

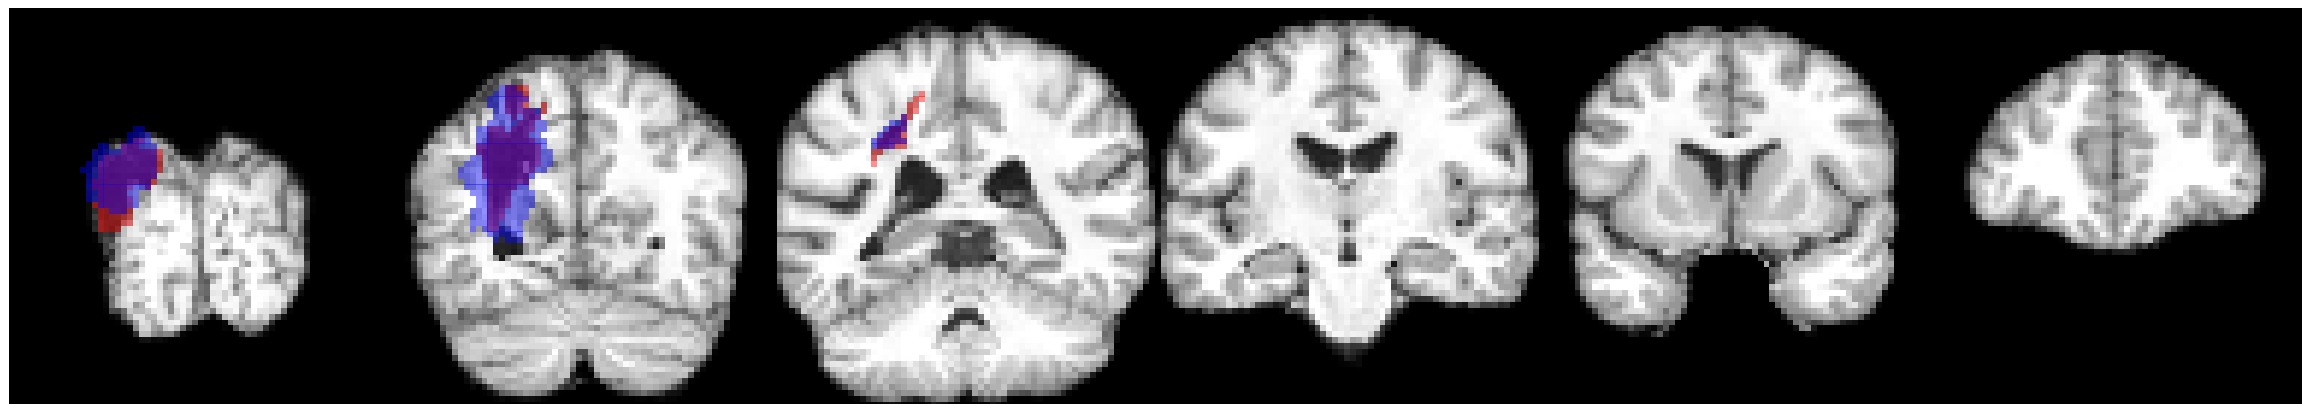



# Subject 25 – MR1737

|                                          | Value  |
|------------------------------------------|--------|
| Lesion Volume (ml)                       | 51.68  |
| Dice Coefficient                         | 0.401  |
| Jaccard Coefficient                      | 0.251  |
| Hausdorff Distance (mm)                  | 53.141 |
| Average Displacement (mm)                | 7.75   |
| Sensitivity (Recall, true positive rate) | 0.262  |
| Specificity (true negative rate)         | 1      |

Normalized T1

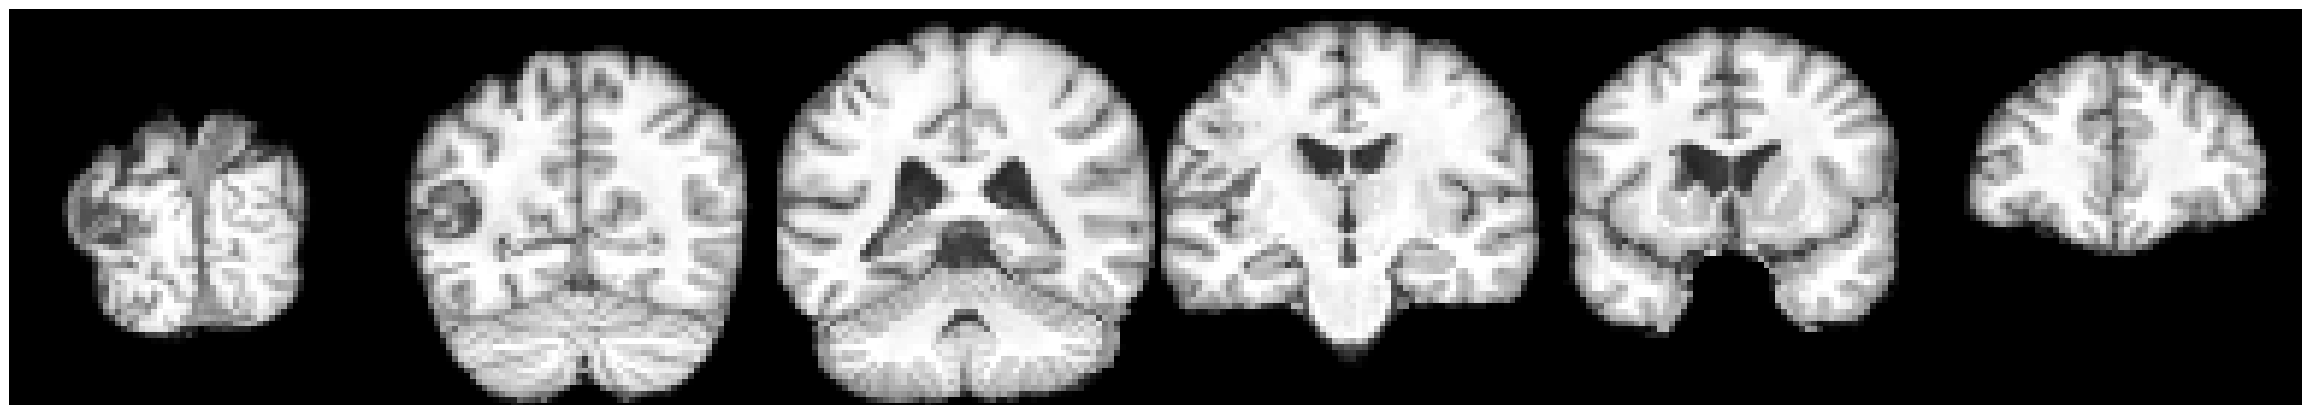

Lesion Overlay

red = Manual Tracing  
blue = LINDA prediction

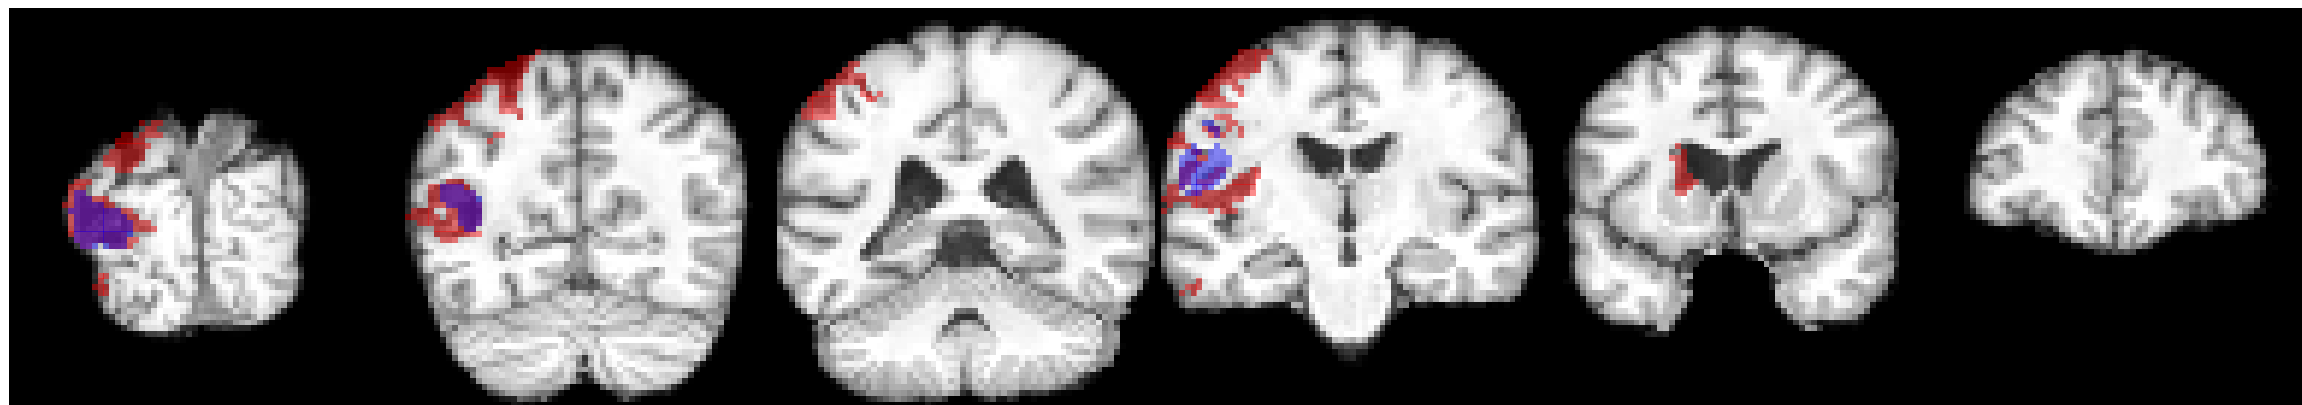

# Subject 26 – MR1743

|                                          | Value  |
|------------------------------------------|--------|
| Lesion Volume (ml)                       | 41.624 |
| Dice Coefficient                         | 0.7    |
| Jaccard Coefficient                      | 0.539  |
| Hausdorff Distance (mm)                  | 18     |
| Average Displacement (mm)                | 2.462  |
| Sensitivity (Recall, true positive rate) | 0.899  |
| Specificity (true negative rate)         | 0.996  |

Normalized T1

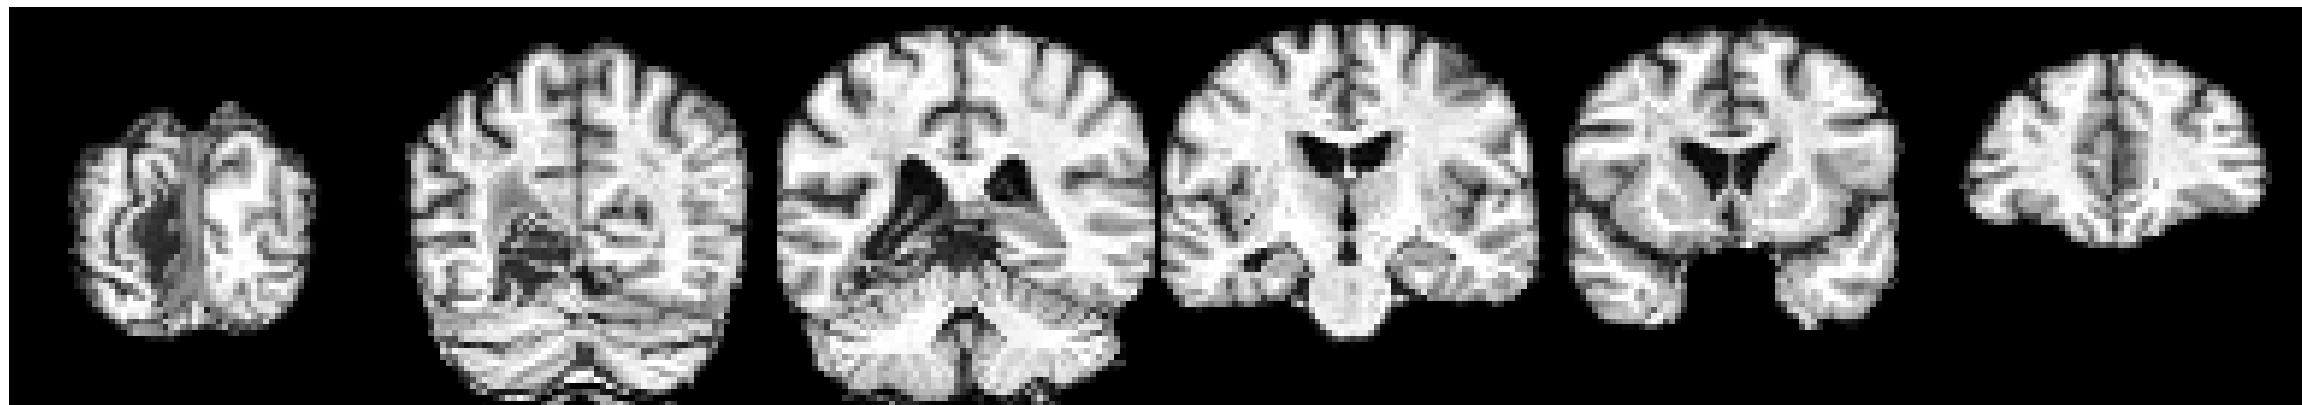

Lesion Overlay

red = Manual Tracing  
blue = LINDA prediction

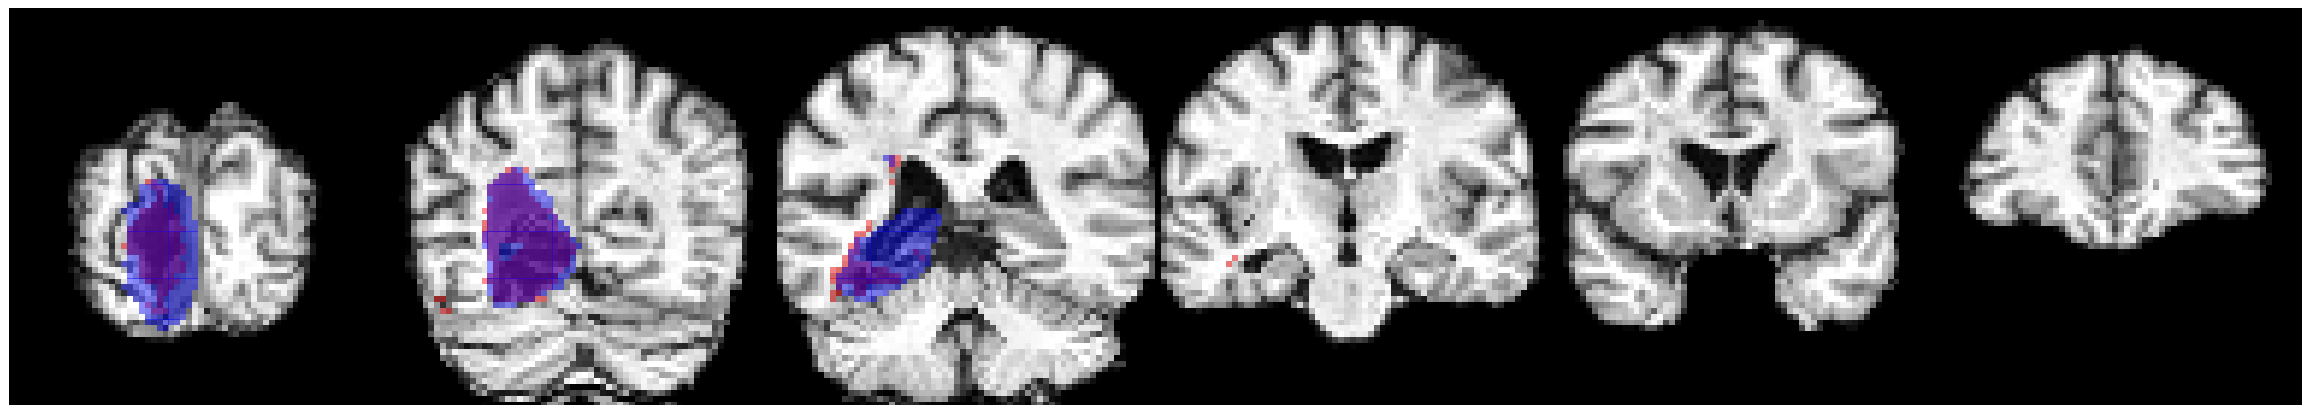

## Subject 27 – MR1775

|                                          | Value  |
|------------------------------------------|--------|
| Lesion Volume (ml)                       | 9.064  |
| Dice Coefficient                         | 0.458  |
| Jaccard Coefficient                      | 0.297  |
| Hausdorff Distance (mm)                  | 26.683 |
| Average Displacement (mm)                | 3.619  |
| Sensitivity (Recall, true positive rate) | 0.365  |
| Specificity (true negative rate)         | 1      |

Normalized T1

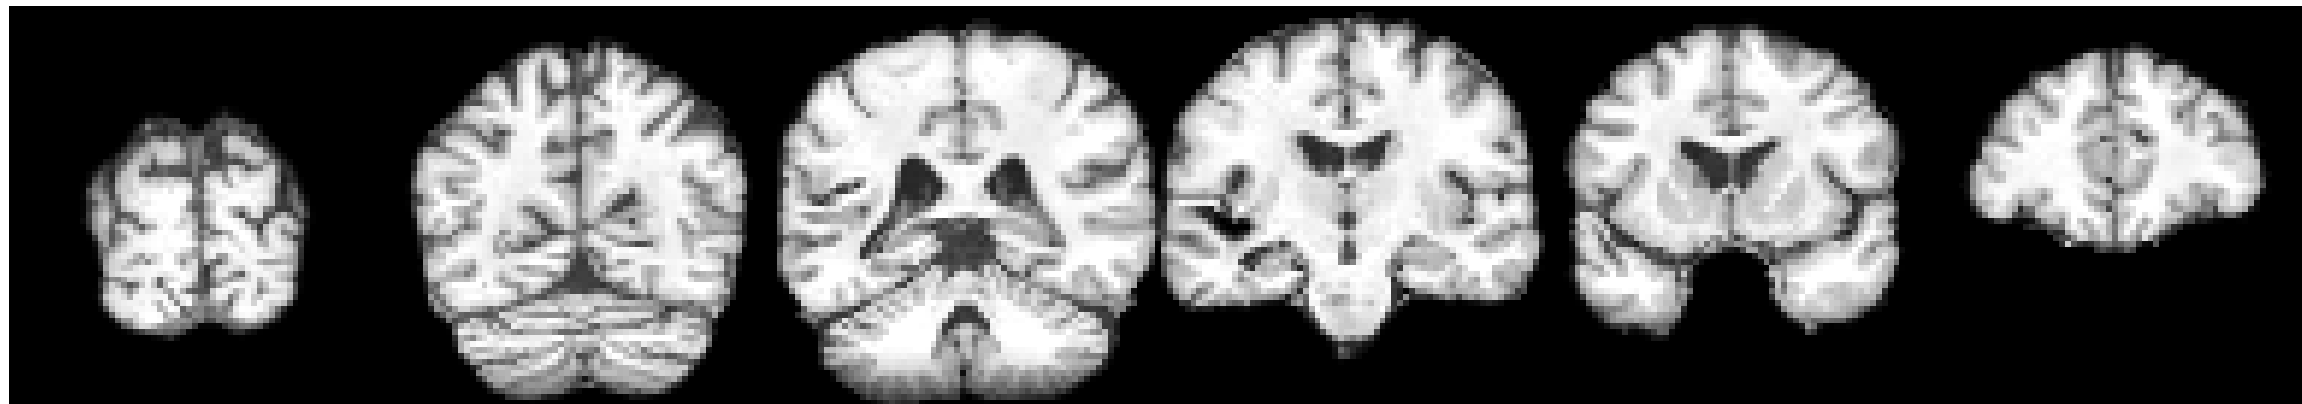

Lesion Overlay

red = Manual Tracing  
blue = LINDA prediction

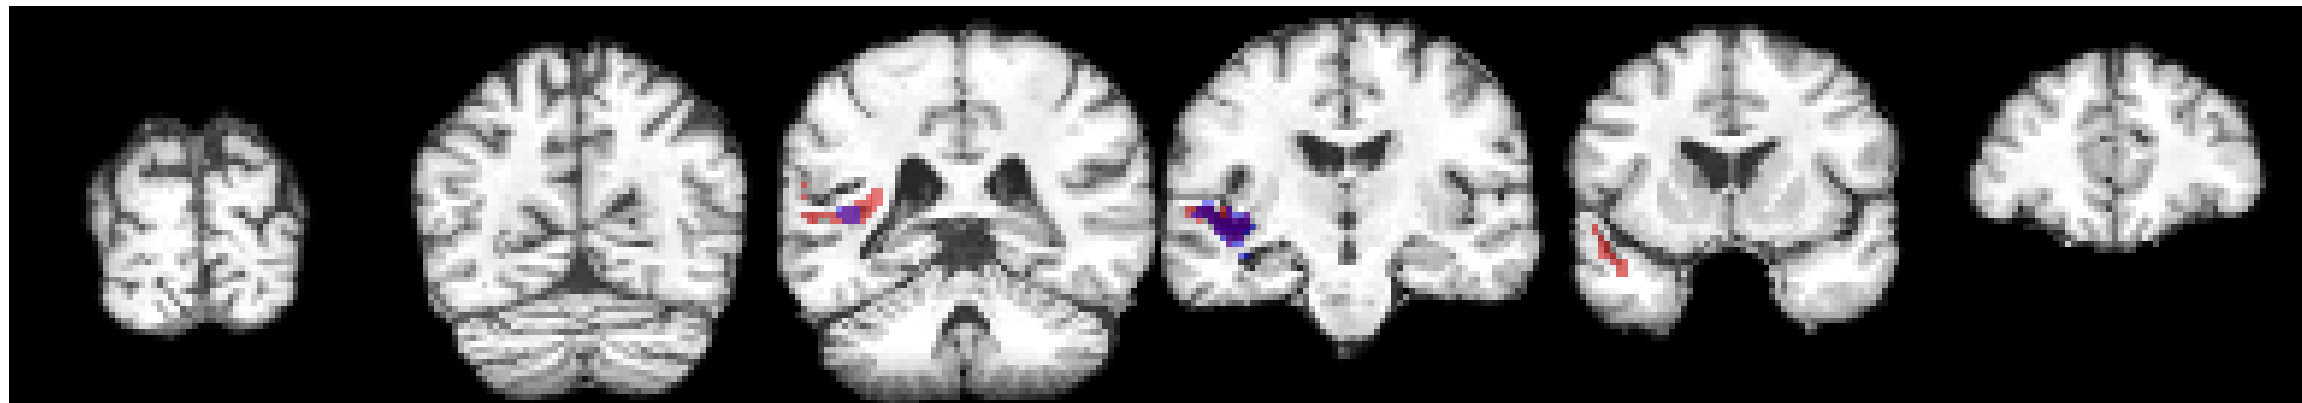

# Subject 28 – MR1780

|                                          | Value  |
|------------------------------------------|--------|
| Lesion Volume (ml)                       | 20.928 |
| Dice Coefficient                         | 0.762  |
| Jaccard Coefficient                      | 0.615  |
| Hausdorff Distance (mm)                  | 14.697 |
| Average Displacement (mm)                | 1.563  |
| Sensitivity (Recall, true positive rate) | 0.67   |
| Specificity (true negative rate)         | 1      |

Normalized T1

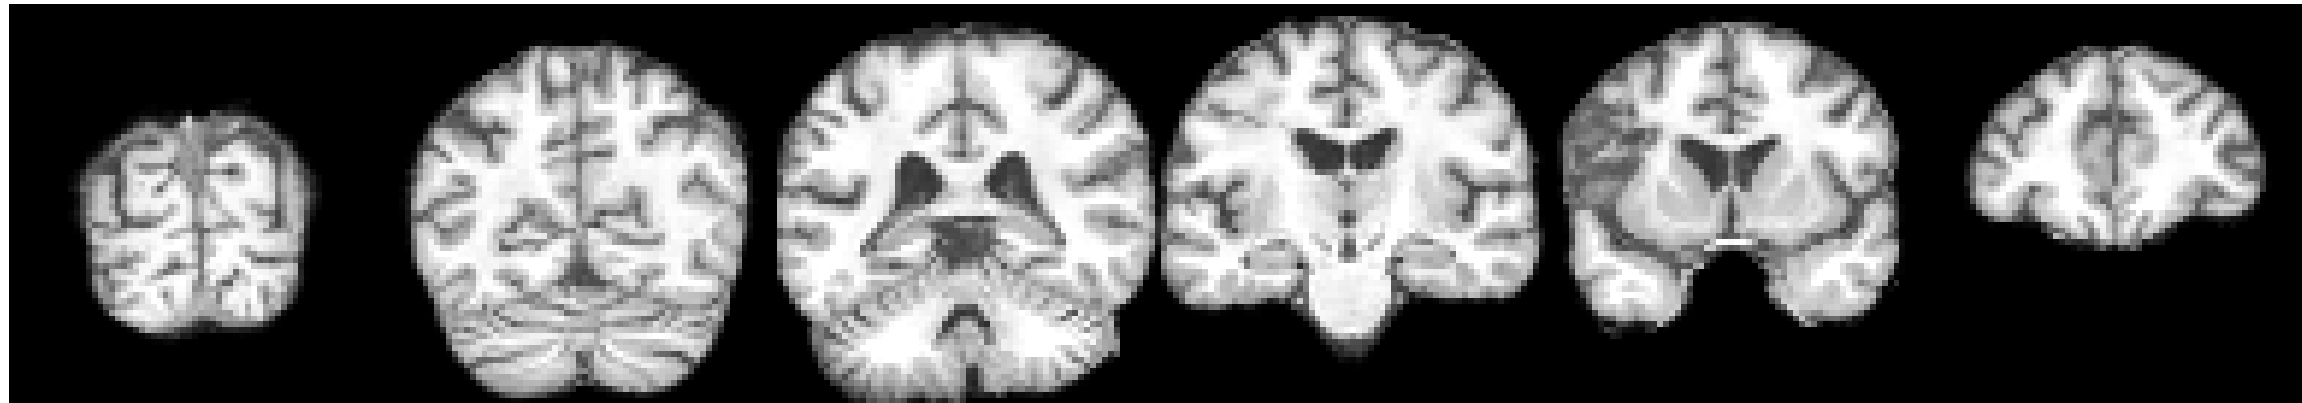

Lesion Overlay

red = Manual Tracing  
blue = LINDA prediction

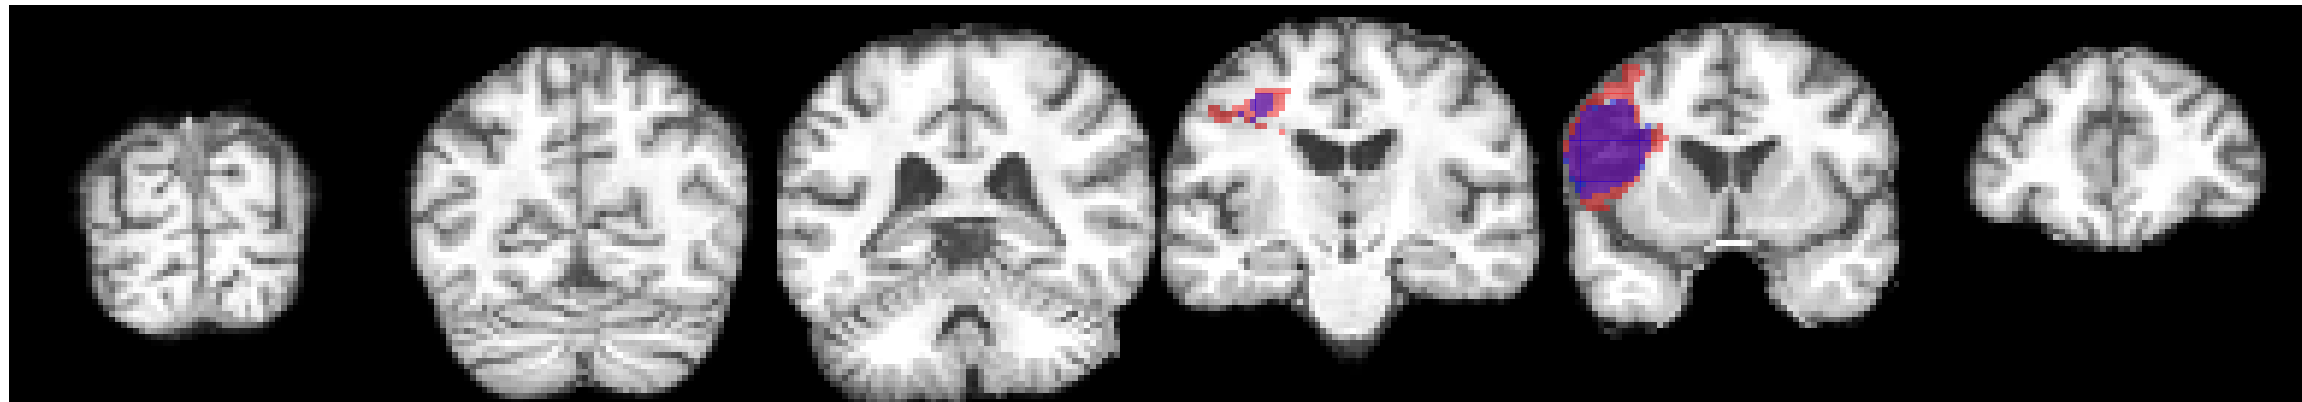

# Subject 29 – MR1862

|                                          | Value  |
|------------------------------------------|--------|
| Lesion Volume (ml)                       | 12.592 |
| Dice Coefficient                         | 0.684  |
| Jaccard Coefficient                      | 0.52   |
| Hausdorff Distance (mm)                  | 16.733 |
| Average Displacement (mm)                | 1.833  |
| Sensitivity (Recall, true positive rate) | 0.616  |
| Specificity (true negative rate)         | 1      |

Normalized T1

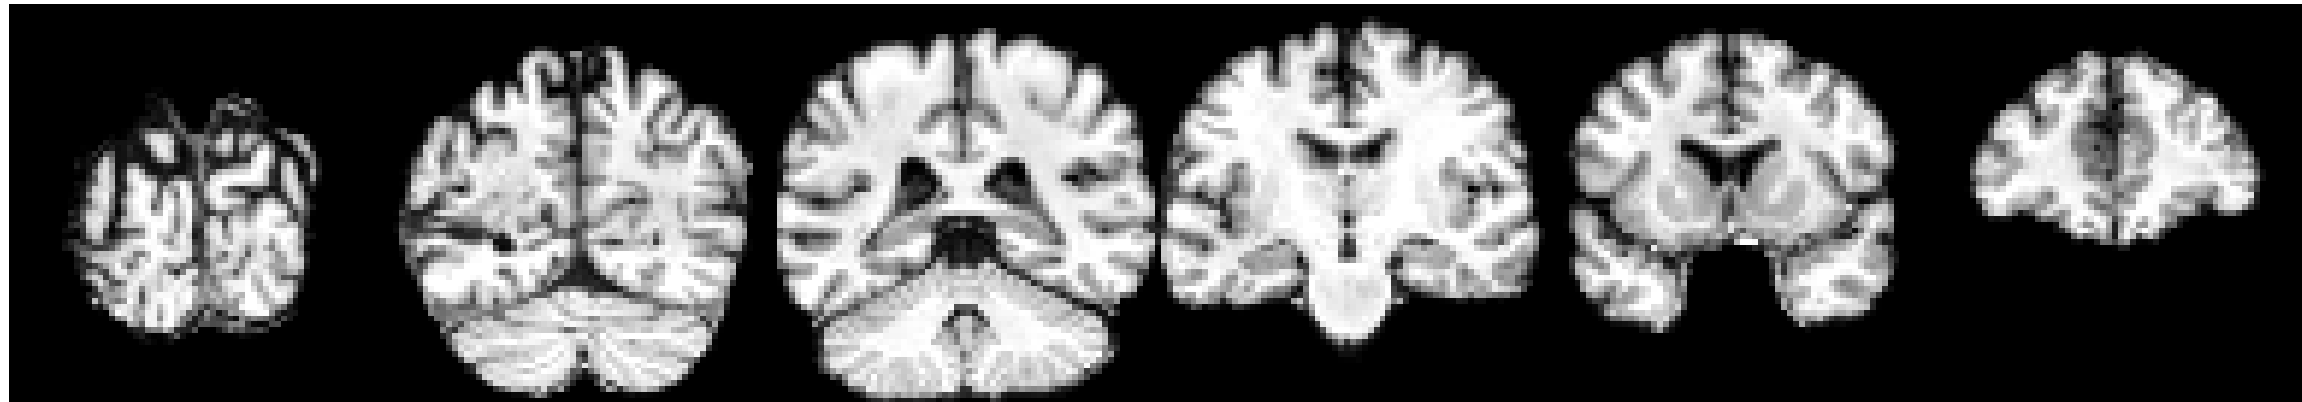

Lesion Overlay

red = Manual Tracing  
blue = LINDA prediction

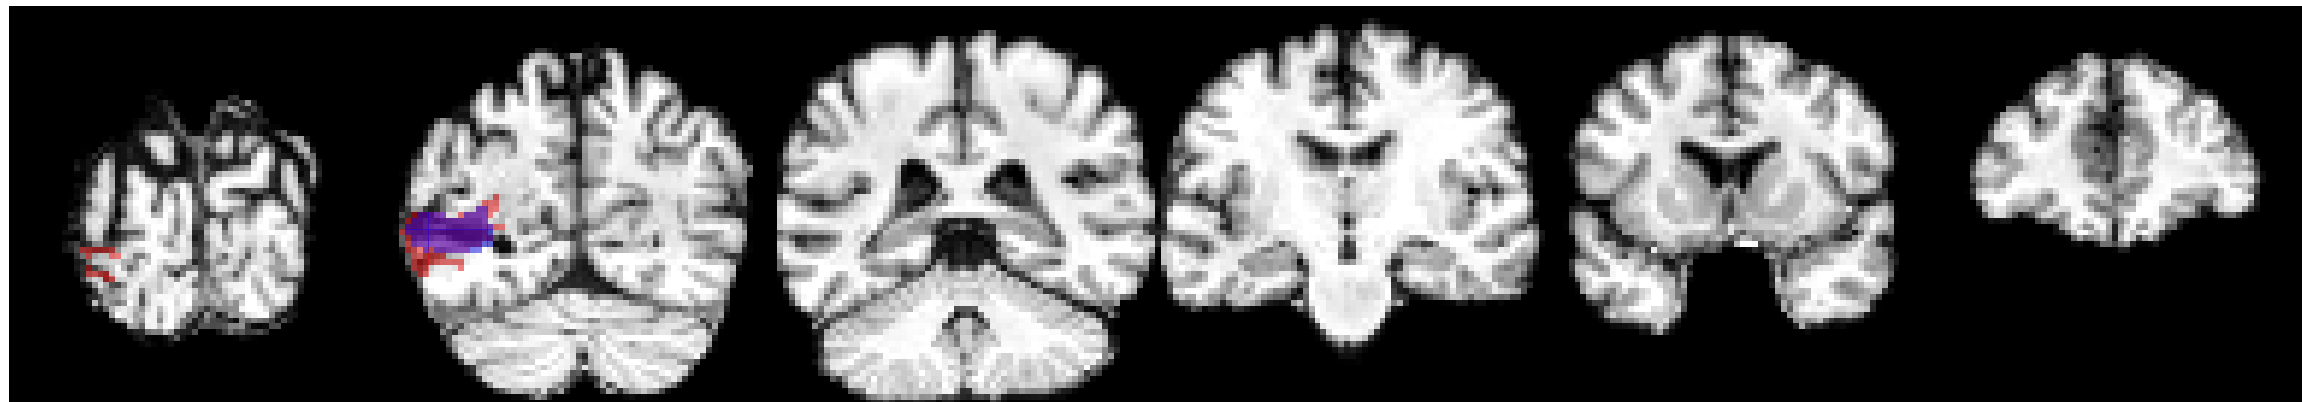

## Subject 30 – MR2011

|                                          | Value  |
|------------------------------------------|--------|
| Lesion Volume (ml)                       | 67.528 |
| Dice Coefficient                         | 0.791  |
| Jaccard Coefficient                      | 0.655  |
| Hausdorff Distance (mm)                  | 10     |
| Average Displacement (mm)                | 2.201  |
| Sensitivity (Recall, true positive rate) | 0.961  |
| Specificity (true negative rate)         | 0.996  |

Normalized T1

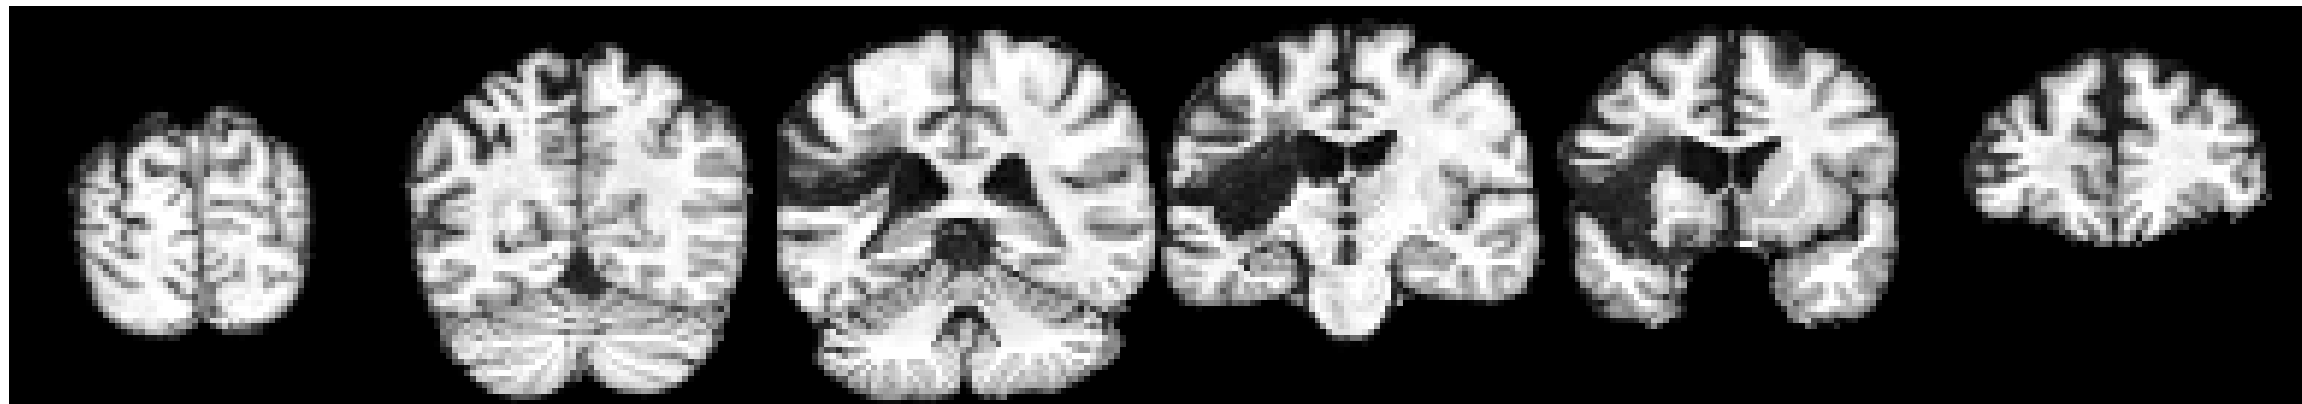

Lesion Overlay

red = Manual Tracing  
blue = LINDA prediction

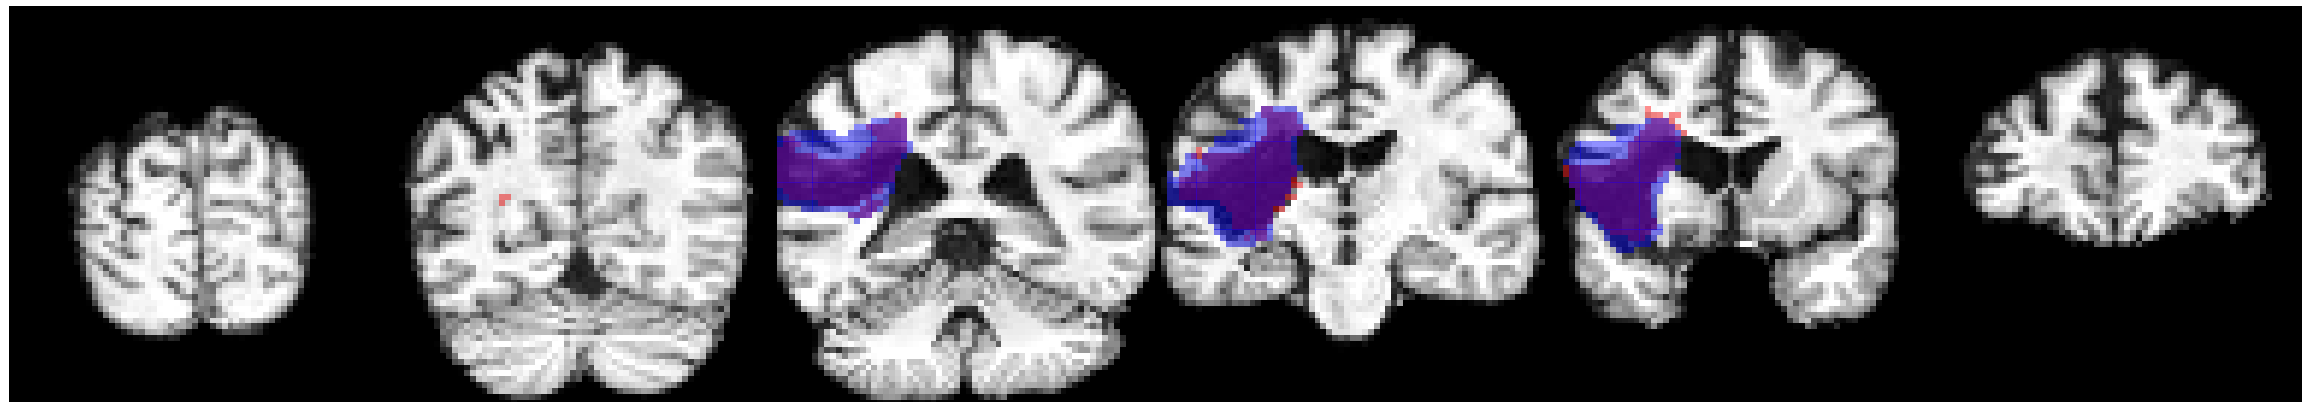

# Subject 31 – MR2090

|                                          | Value   |
|------------------------------------------|---------|
| Lesion Volume (ml)                       | 232.384 |
| Dice Coefficient                         | 0.895   |
| Jaccard Coefficient                      | 0.809   |
| Hausdorff Distance (mm)                  | 12.961  |
| Average Displacement (mm)                | 1.548   |
| Sensitivity (Recall, true positive rate) | 0.882   |
| Specificity (true negative rate)         | 0.997   |

Normalized T1

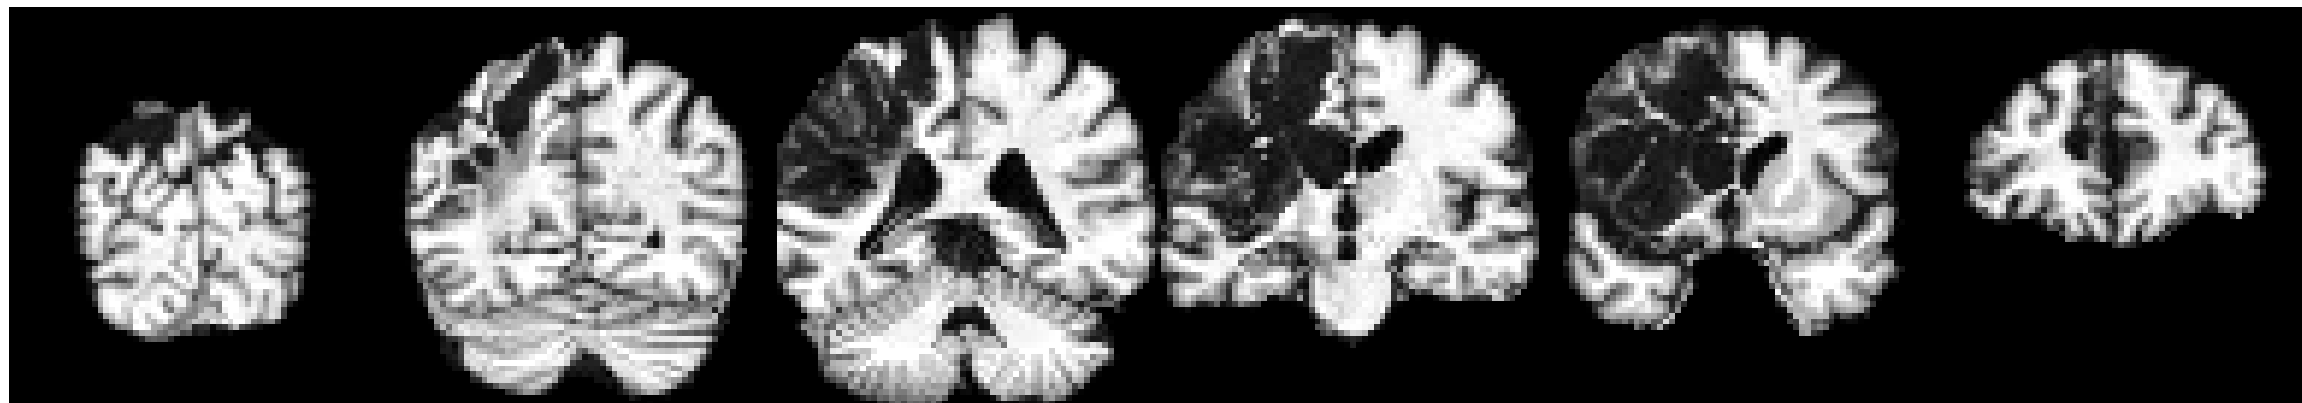

Lesion Overlay

red = Manual Tracing  
blue = LINDA prediction

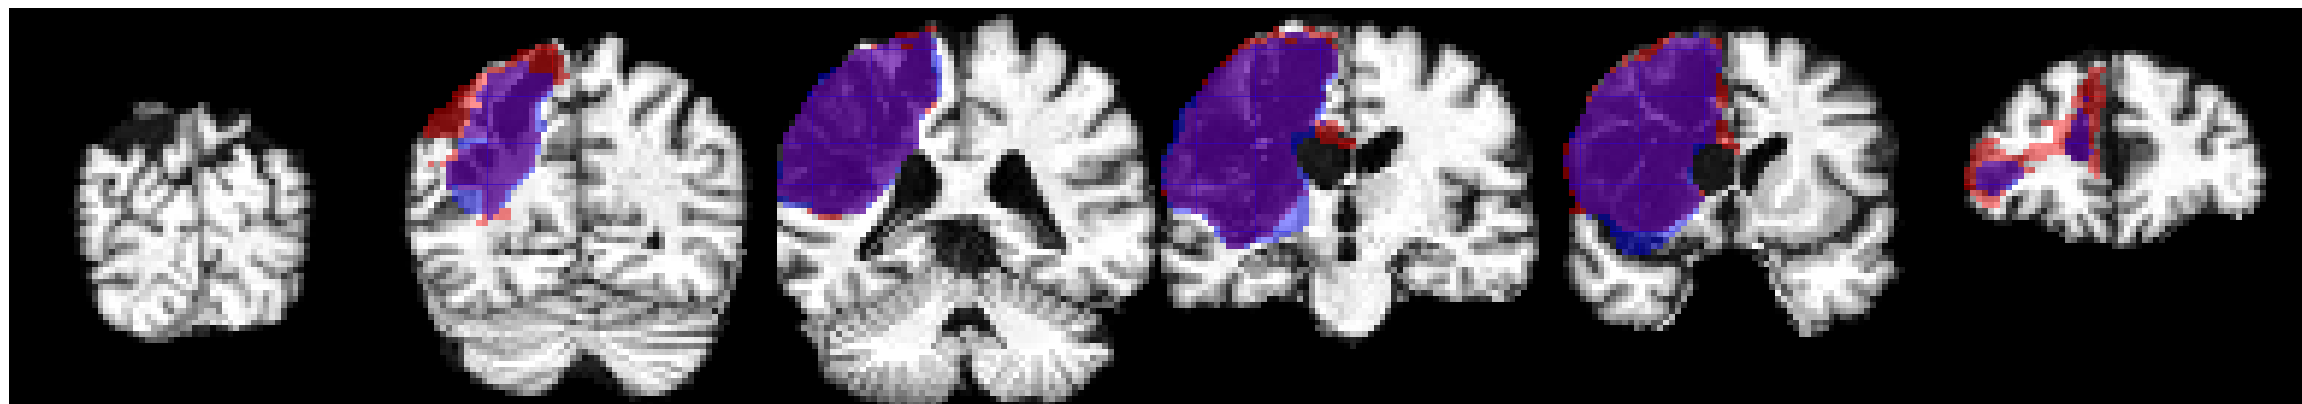

## Subject 32 – MR2091

|                                          | Value   |
|------------------------------------------|---------|
| Lesion Volume (ml)                       | 114.248 |
| Dice Coefficient                         | 0.819   |
| Jaccard Coefficient                      | 0.693   |
| Hausdorff Distance (mm)                  | 9.165   |
| Average Displacement (mm)                | 2.243   |
| Sensitivity (Recall, true positive rate) | 0.961   |
| Specificity (true negative rate)         | 0.994   |

Normalized T1

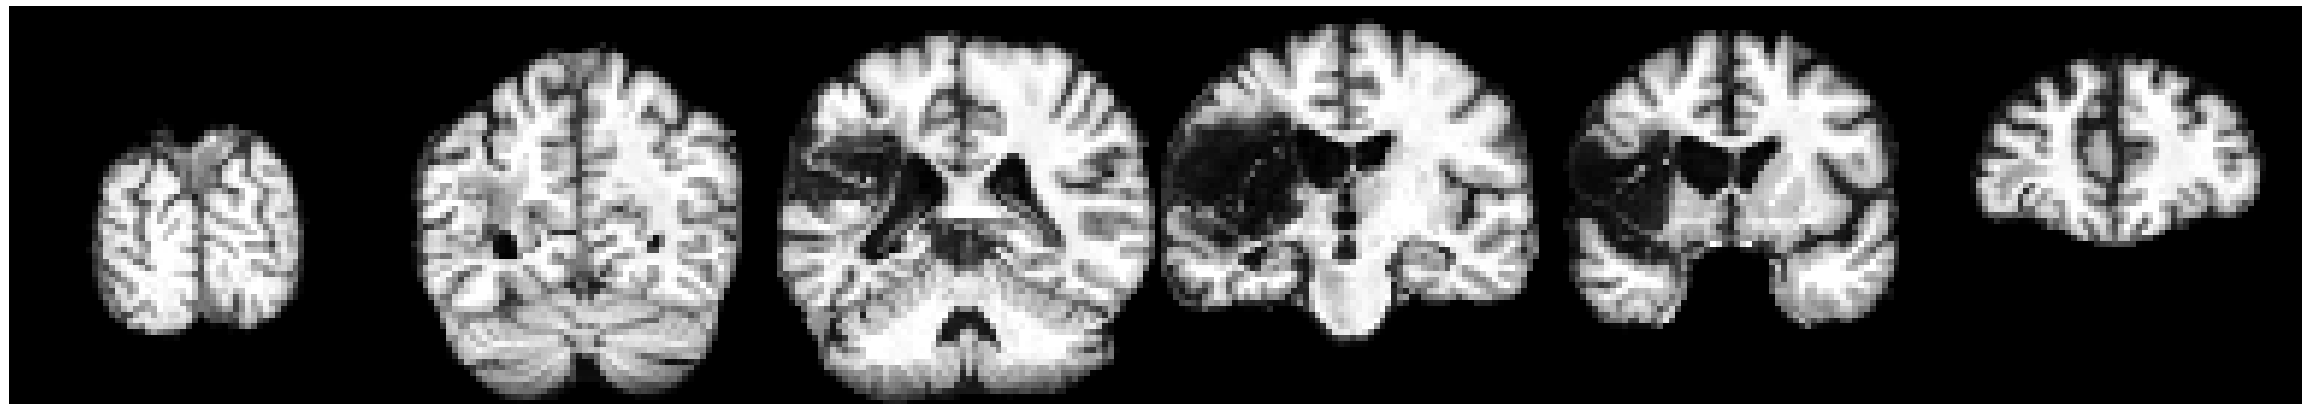

Lesion Overlay

red = Manual Tracing  
blue = LINDA prediction

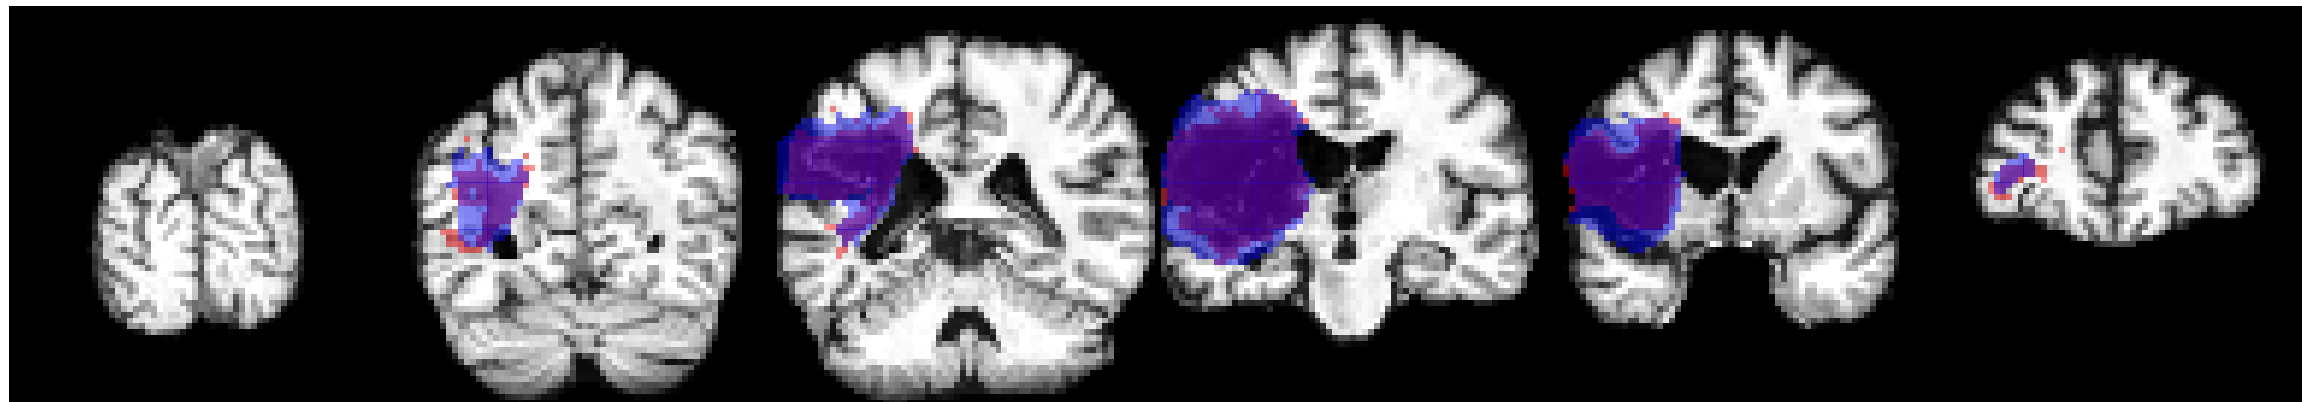



# Subject 33 – MR2139

|                                          | Value  |
|------------------------------------------|--------|
| Lesion Volume (ml)                       | 21.216 |
| Dice Coefficient                         | 0.59   |
| Jaccard Coefficient                      | 0.419  |
| Hausdorff Distance (mm)                  | 35.327 |
| Average Displacement (mm)                | 2.729  |
| Sensitivity (Recall, true positive rate) | 0.48   |
| Specificity (true negative rate)         | 1      |

Normalized T1

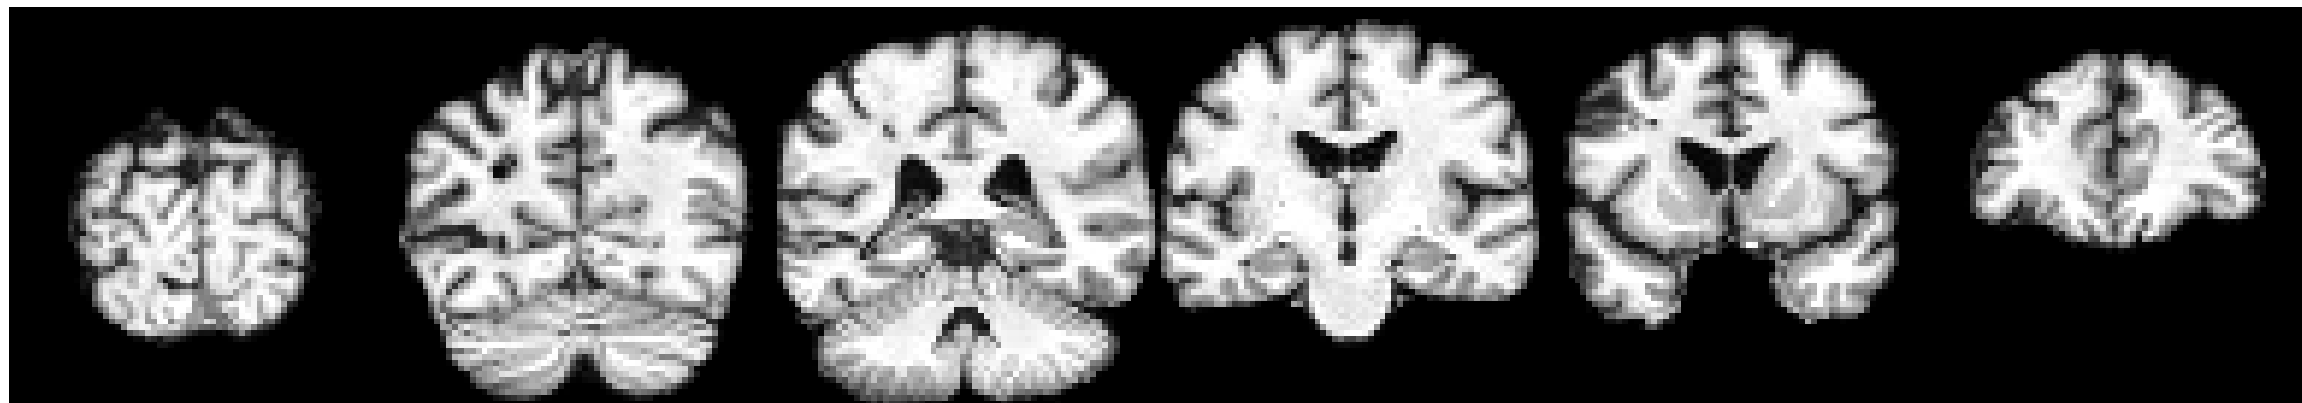

Lesion Overlay

red = Manual Tracing  
blue = LINDA prediction

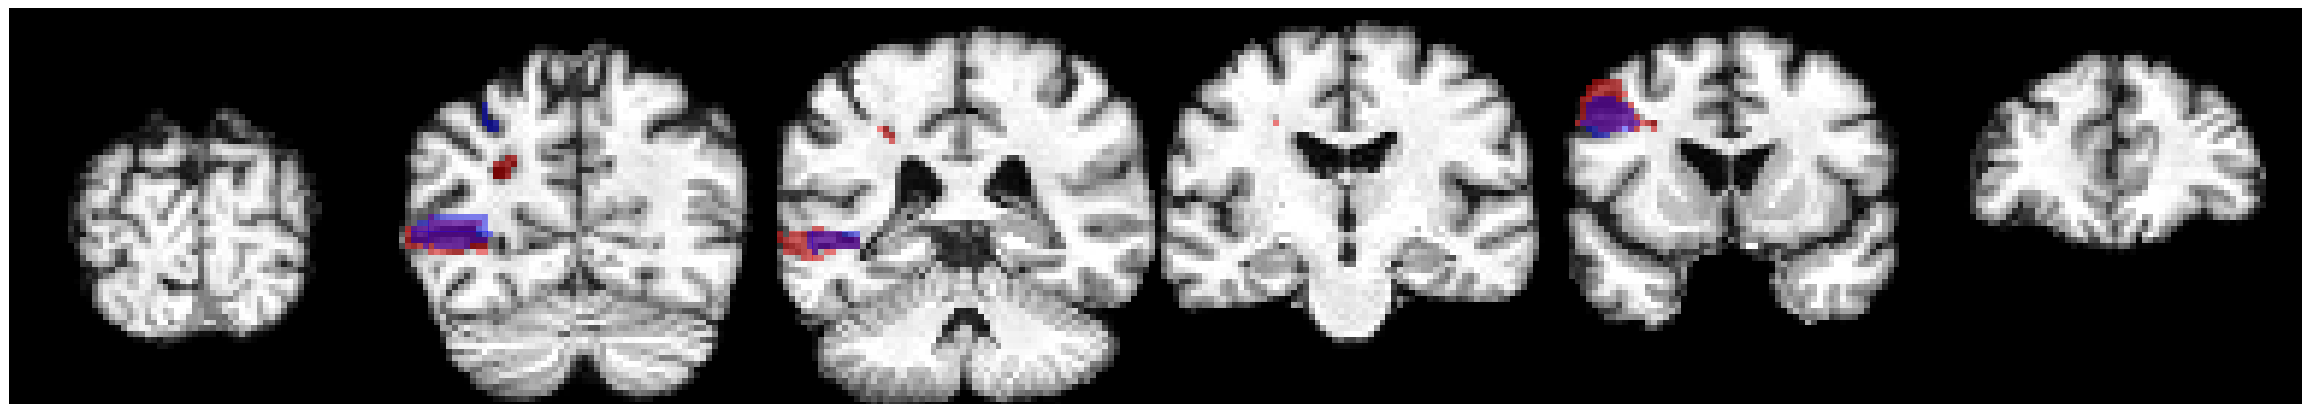

# Subject 34 – MR2162

|                                          | Value  |
|------------------------------------------|--------|
| Lesion Volume (ml)                       | 19.096 |
| Dice Coefficient                         | 0.687  |
| Jaccard Coefficient                      | 0.524  |
| Hausdorff Distance (mm)                  | 21.26  |
| Average Displacement (mm)                | 2.275  |
| Sensitivity (Recall, true positive rate) | 0.742  |
| Specificity (true negative rate)         | 0.999  |

Normalized T1

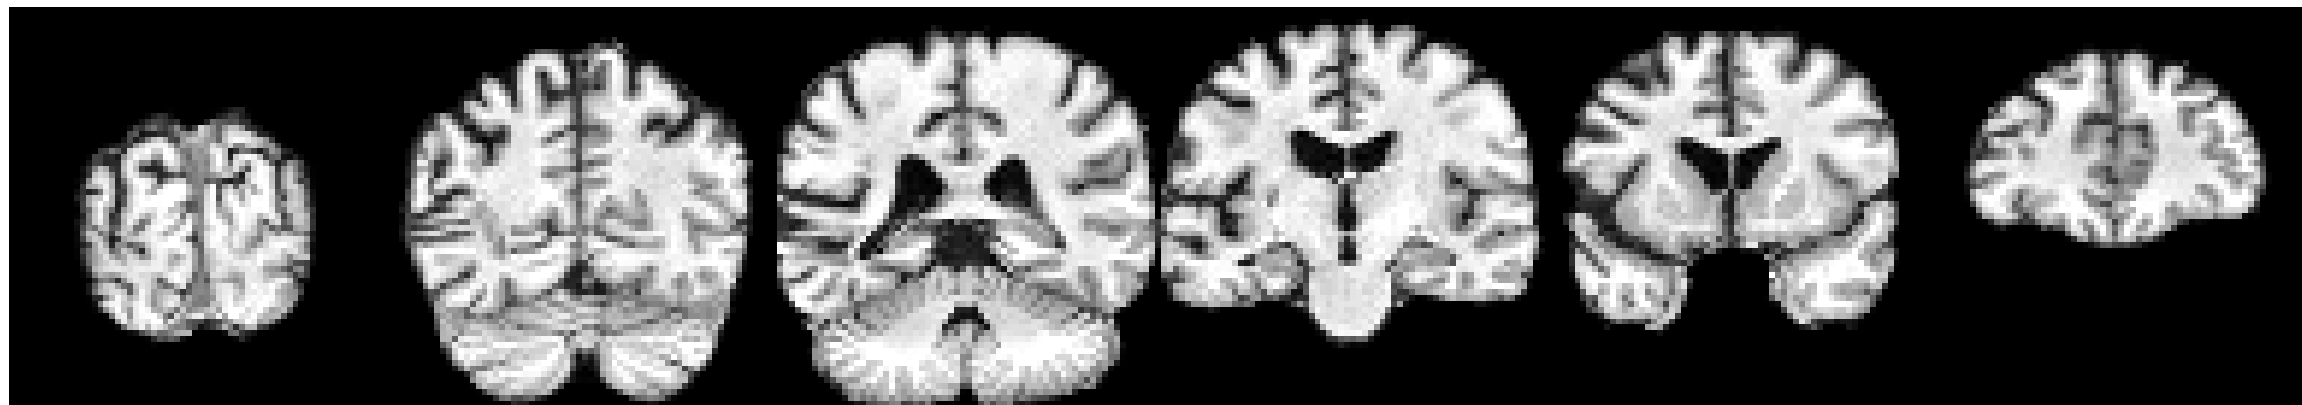

Lesion Overlay

red = Manual Tracing  
blue = LINDA prediction

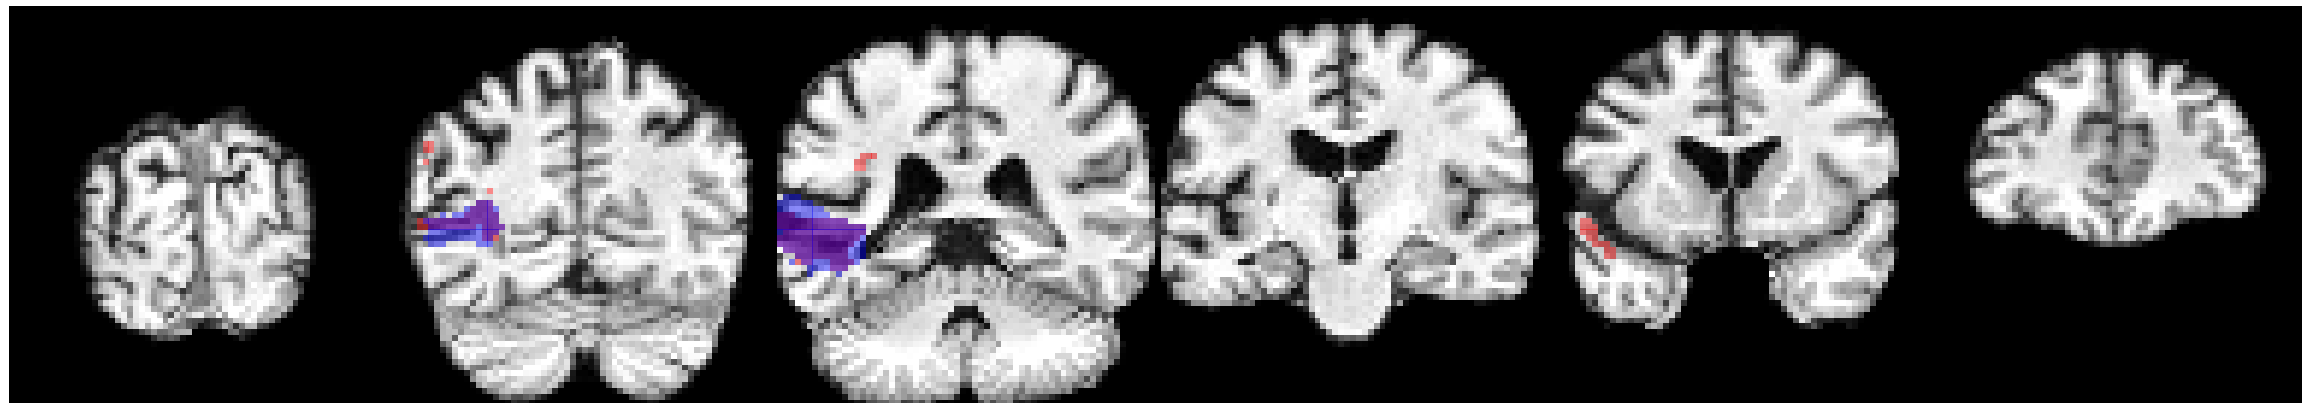

# Subject 35 – MR2172

|                                          | Value |
|------------------------------------------|-------|
| Lesion Volume (ml)                       | 54.2  |
| Dice Coefficient                         | 0.815 |
| Jaccard Coefficient                      | 0.688 |
| Hausdorff Distance (mm)                  | 10    |
| Average Displacement (mm)                | 1.513 |
| Sensitivity (Recall, true positive rate) | 0.785 |
| Specificity (true negative rate)         | 0.999 |

Normalized T1

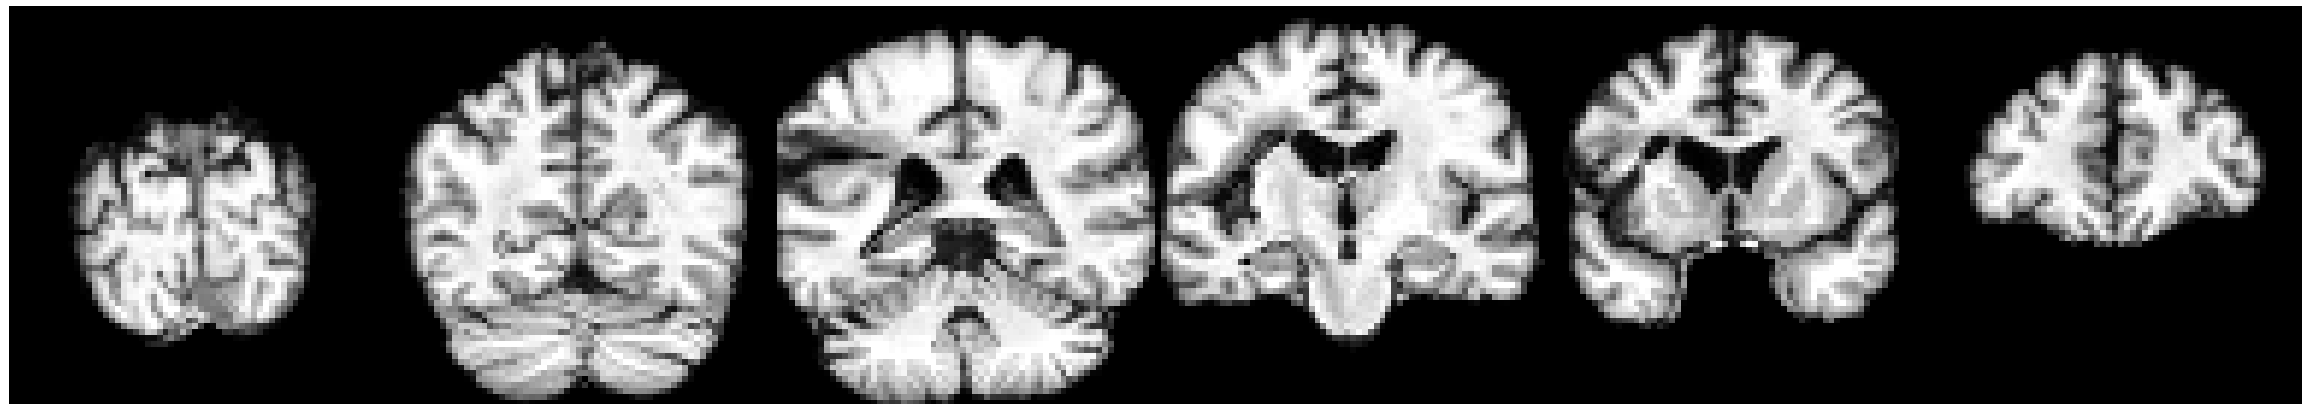

Lesion Overlay

red = Manual Tracing  
blue = LINDA prediction

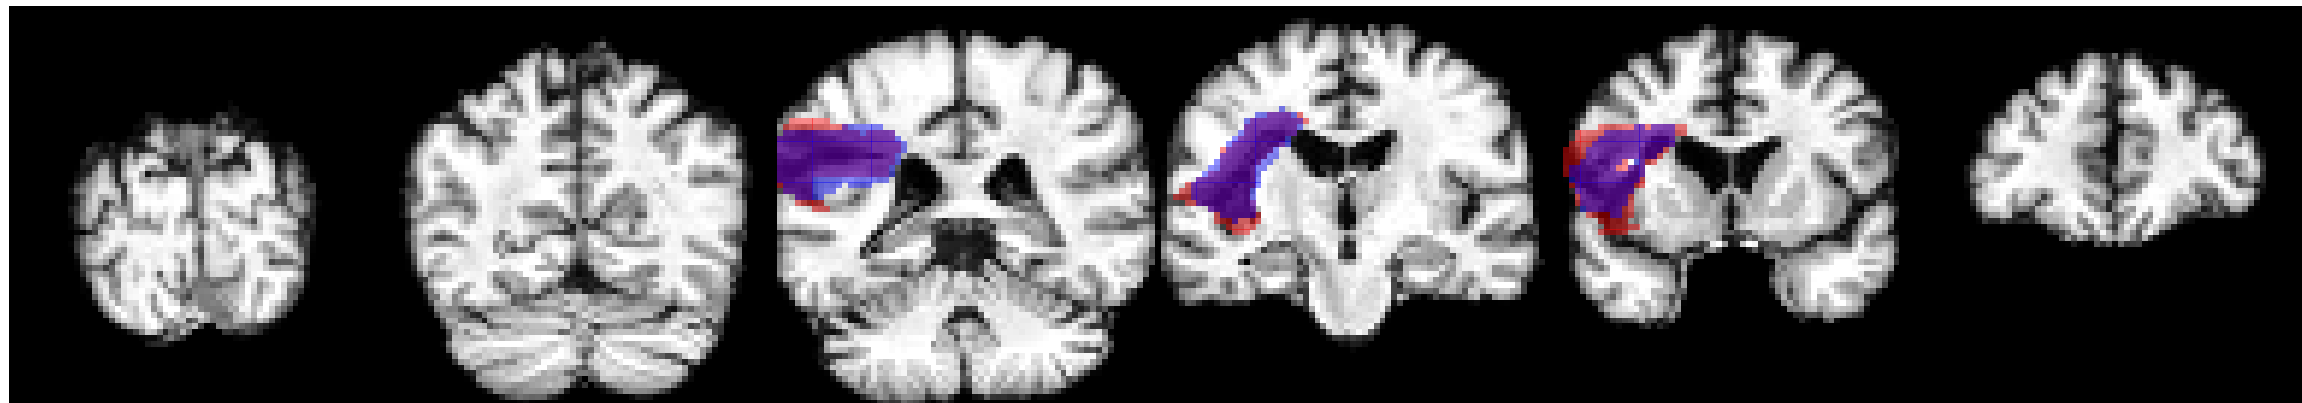

# Subject 36 – MR2221

|                                          | Value  |
|------------------------------------------|--------|
| Lesion Volume (ml)                       | 53.704 |
| Dice Coefficient                         | 0.766  |
| Jaccard Coefficient                      | 0.62   |
| Hausdorff Distance (mm)                  | 24.739 |
| Average Displacement (mm)                | 2.762  |
| Sensitivity (Recall, true positive rate) | 0.711  |
| Specificity (true negative rate)         | 0.999  |

Normalized T1

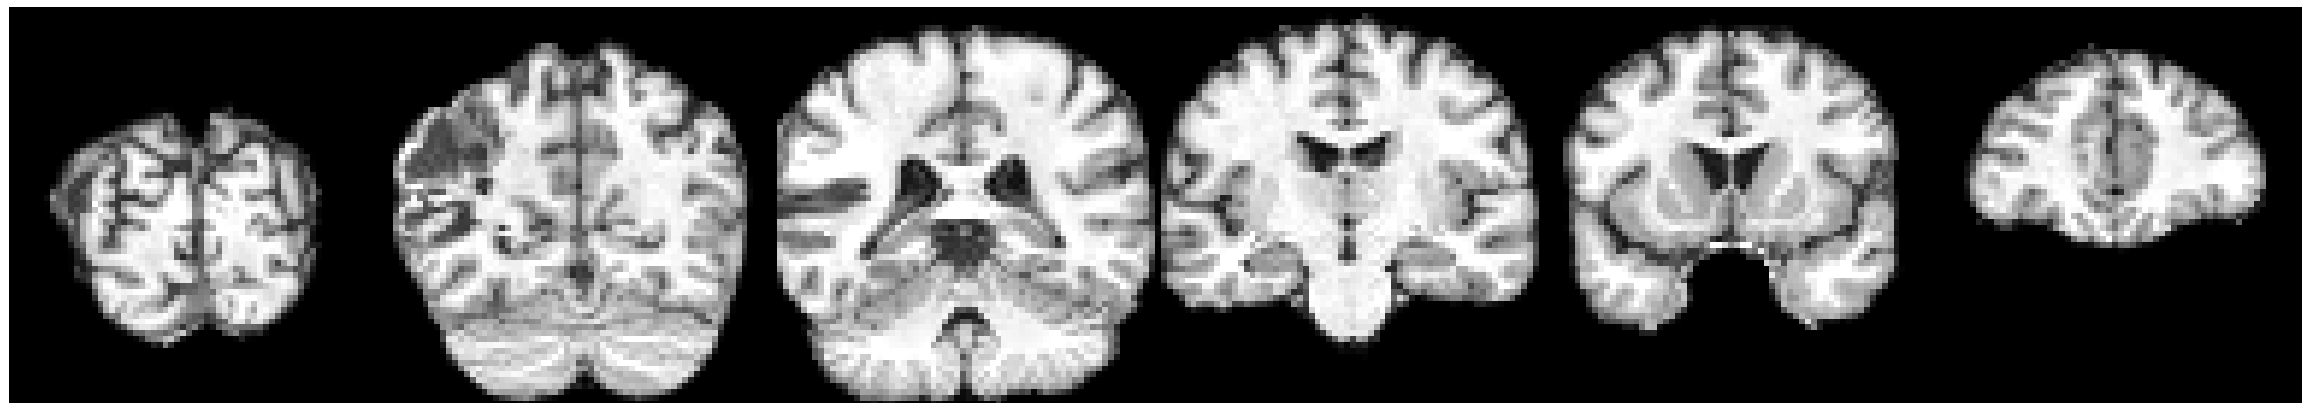

Lesion Overlay

red = Manual Tracing  
blue = LINDA prediction

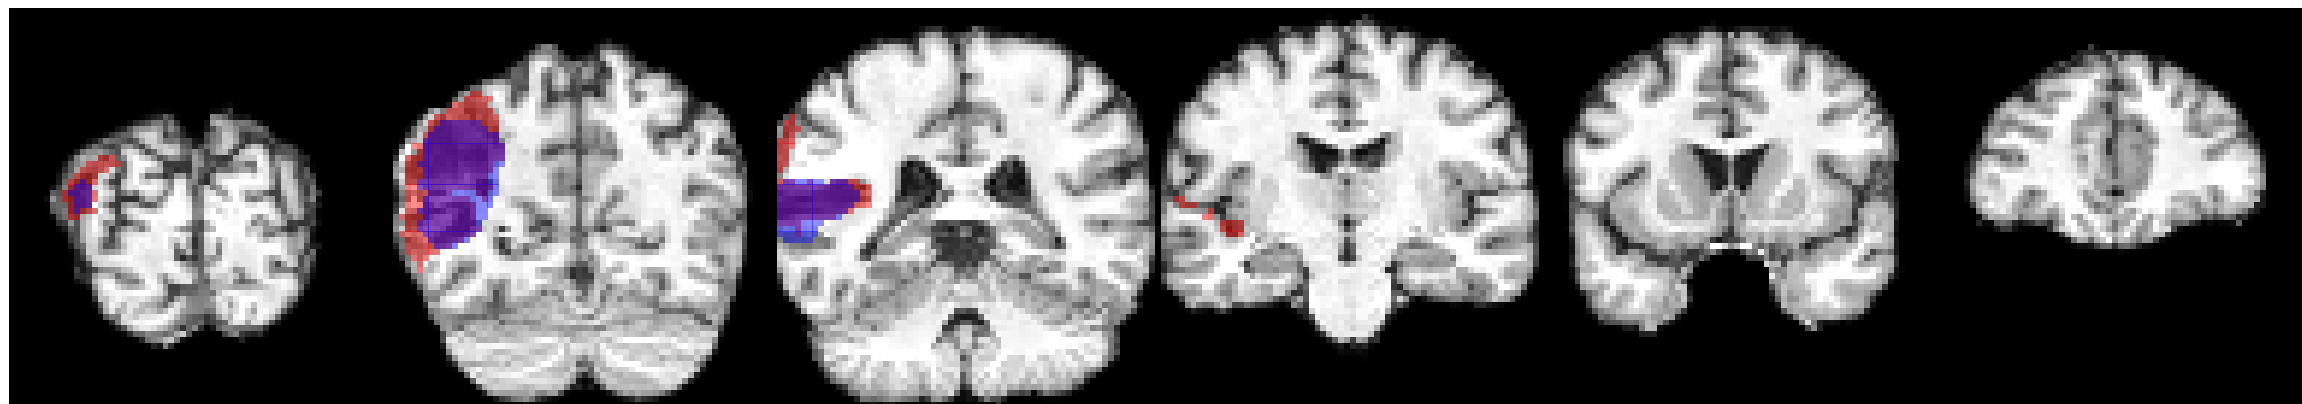

# Subject 37 – MR2232

|                                          | Value   |
|------------------------------------------|---------|
| Lesion Volume (ml)                       | 119.784 |
| Dice Coefficient                         | 0.812   |
| Jaccard Coefficient                      | 0.683   |
| Hausdorff Distance (mm)                  | 18.547  |
| Average Displacement (mm)                | 1.932   |
| Sensitivity (Recall, true positive rate) | 0.828   |
| Specificity (true negative rate)         | 0.997   |

Normalized T1

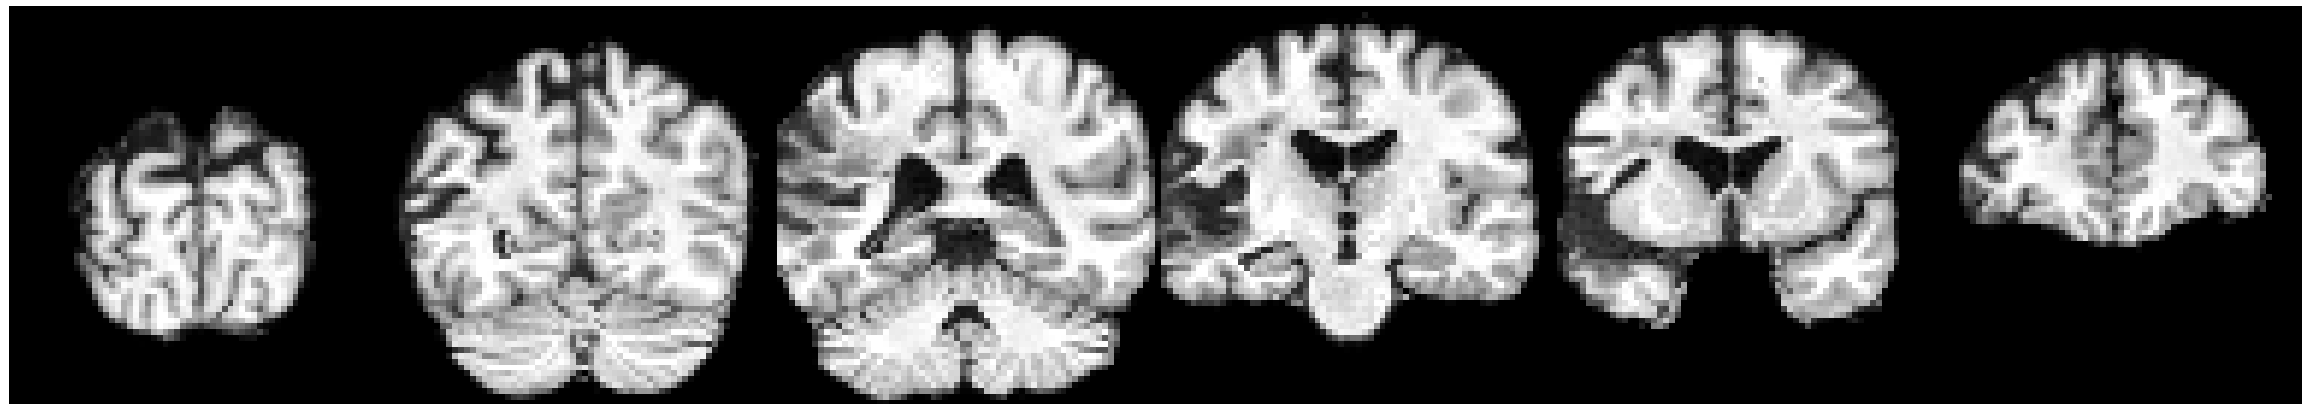

Lesion Overlay

red = Manual Tracing  
blue = LINDA prediction

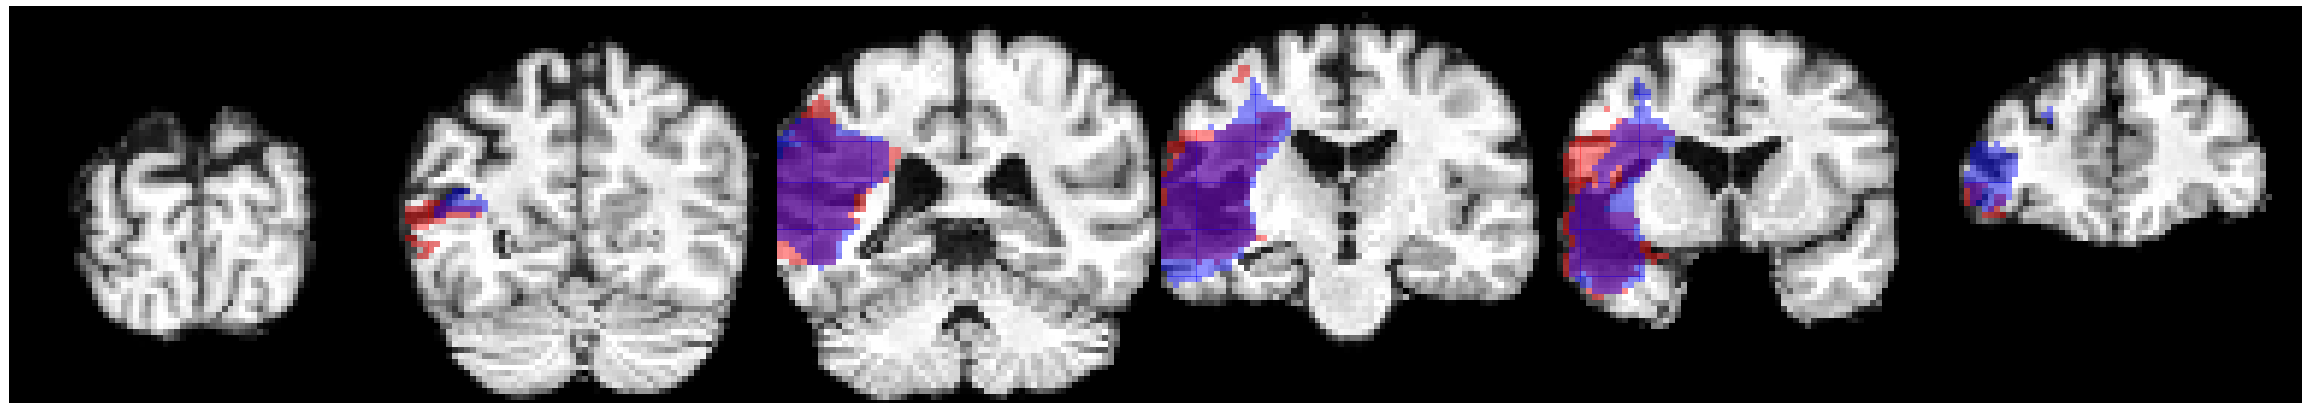

# Subject 38 – MR2255

|                                          | Value |
|------------------------------------------|-------|
| Lesion Volume (ml)                       | 88.52 |
| Dice Coefficient                         | 0.82  |
| Jaccard Coefficient                      | 0.695 |
| Hausdorff Distance (mm)                  | 8.944 |
| Average Displacement (mm)                | 1.83  |
| Sensitivity (Recall, true positive rate) | 0.908 |
| Specificity (true negative rate)         | 0.997 |

Normalized T1

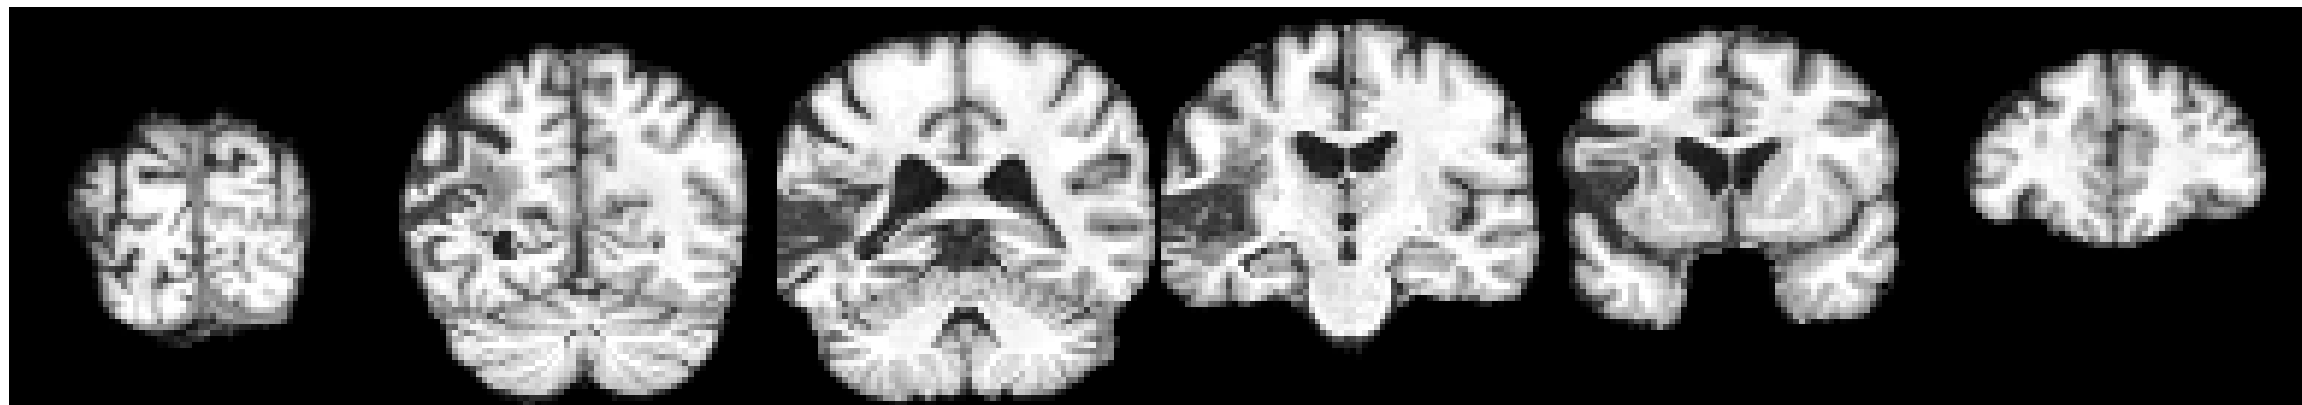

Lesion Overlay

red = Manual Tracing  
blue = LINDA prediction

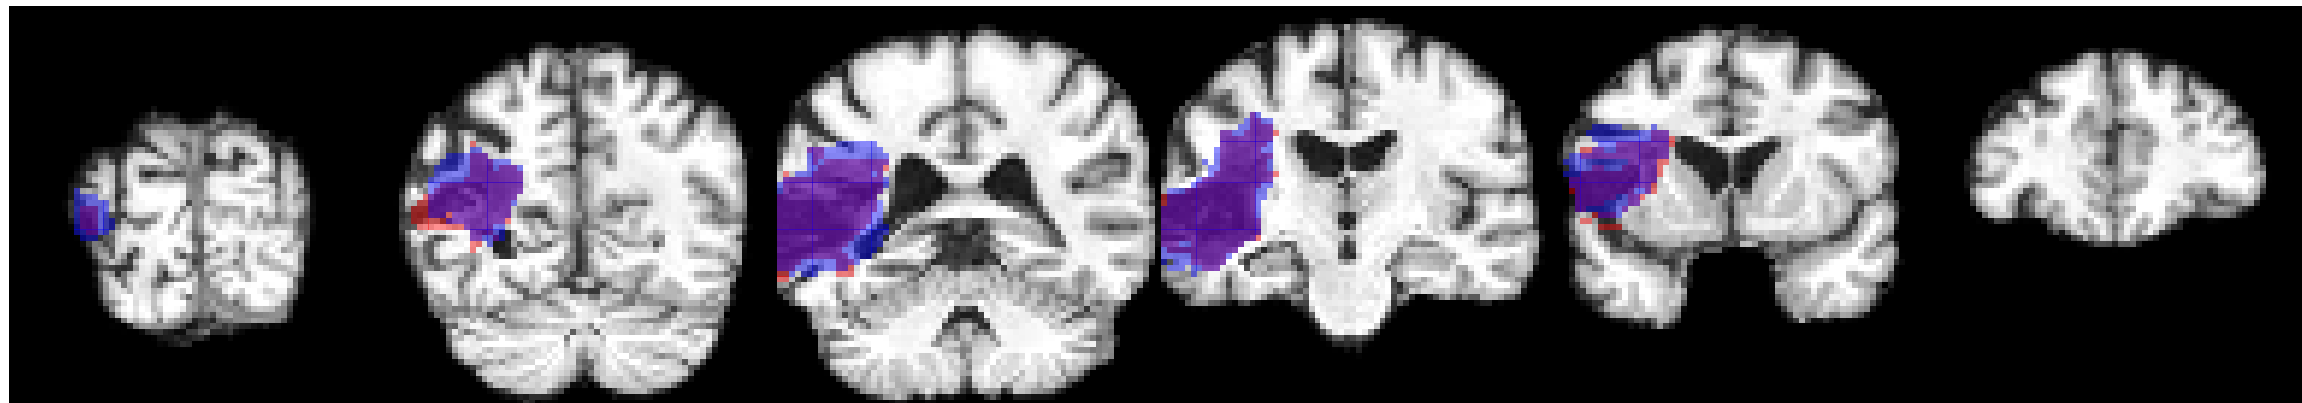

## Subject 39 – MR2271

|                                          | Value   |
|------------------------------------------|---------|
| Lesion Volume (ml)                       | 189.184 |
| Dice Coefficient                         | 0.609   |
| Jaccard Coefficient                      | 0.437   |
| Hausdorff Distance (mm)                  | 36.111  |
| Average Displacement (mm)                | 4.818   |
| Sensitivity (Recall, true positive rate) | 0.564   |
| Specificity (true negative rate)         | 0.993   |

Normalized T1

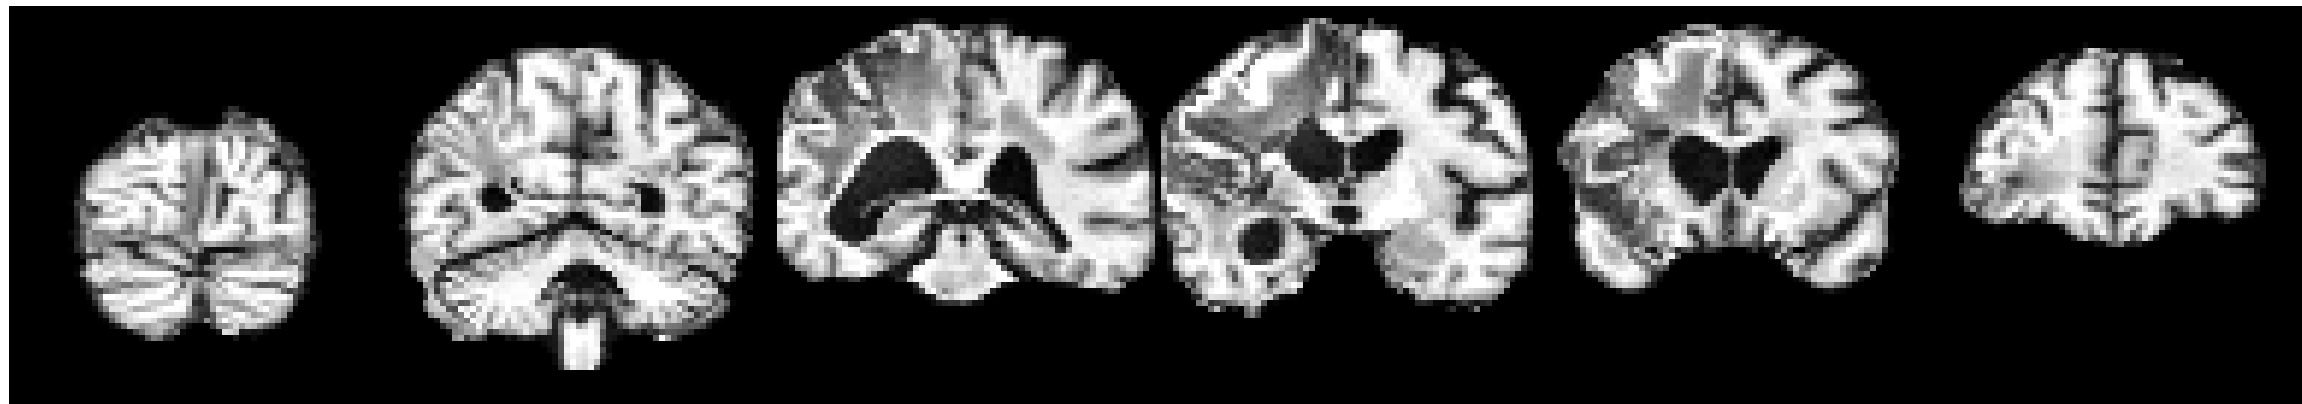

Lesion Overlay

red = Manual Tracing  
blue = LINDA prediction

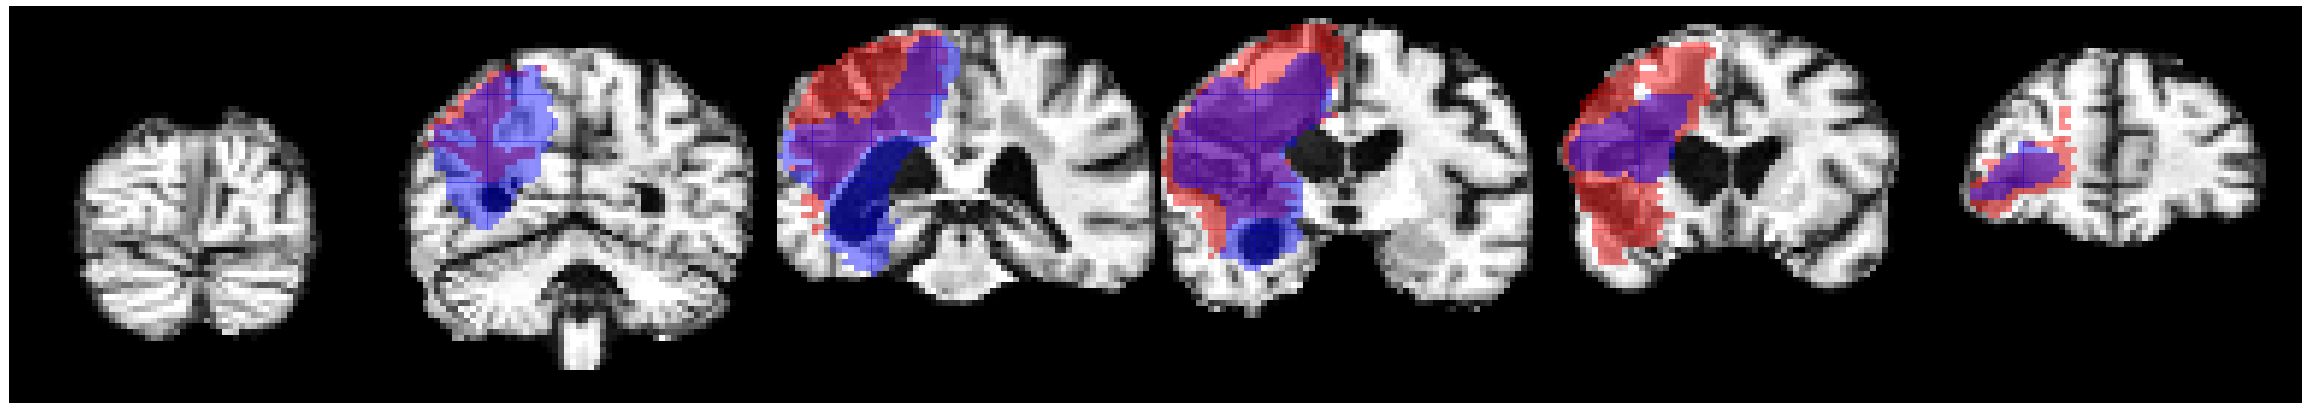

# Subject 40 – MR2289

|                                          | Value  |
|------------------------------------------|--------|
| Lesion Volume (ml)                       | 37.76  |
| Dice Coefficient                         | 0.786  |
| Jaccard Coefficient                      | 0.648  |
| Hausdorff Distance (mm)                  | 10.198 |
| Average Displacement (mm)                | 1.784  |
| Sensitivity (Recall, true positive rate) | 0.708  |
| Specificity (true negative rate)         | 1      |

Normalized T1

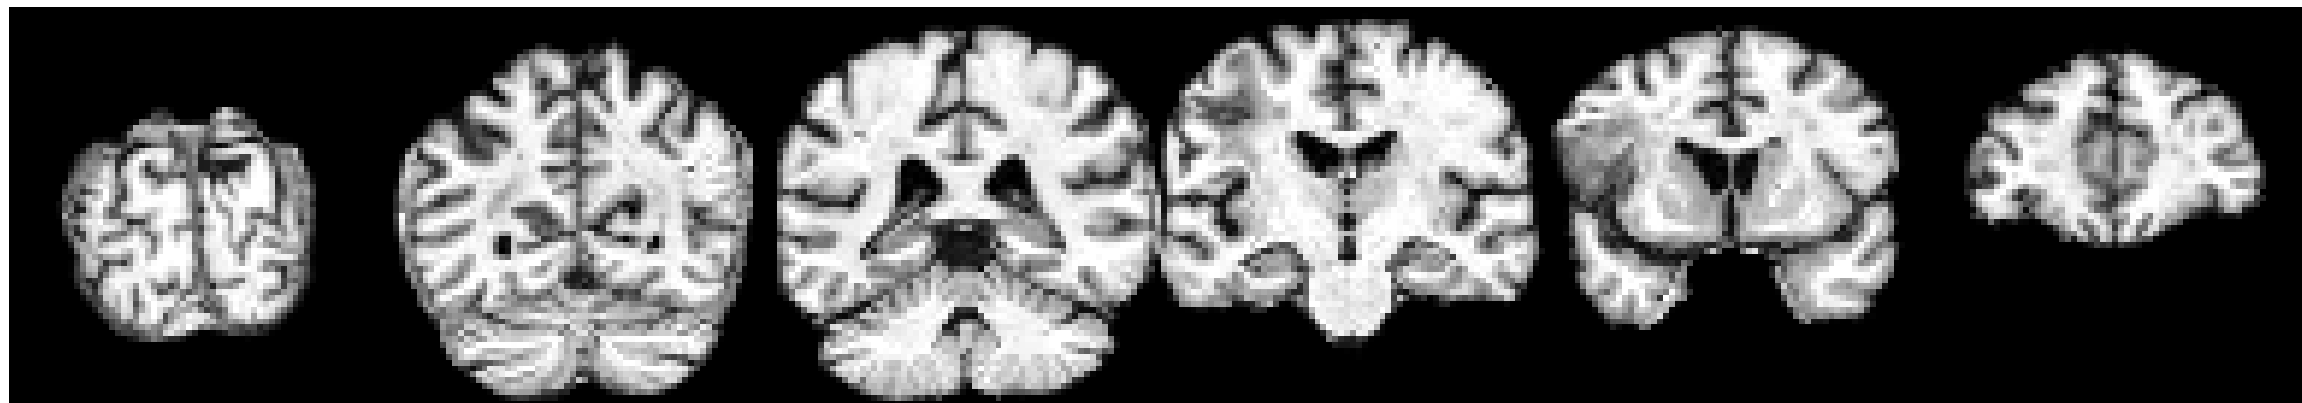

Lesion Overlay

red = Manual Tracing  
blue = LINDA prediction

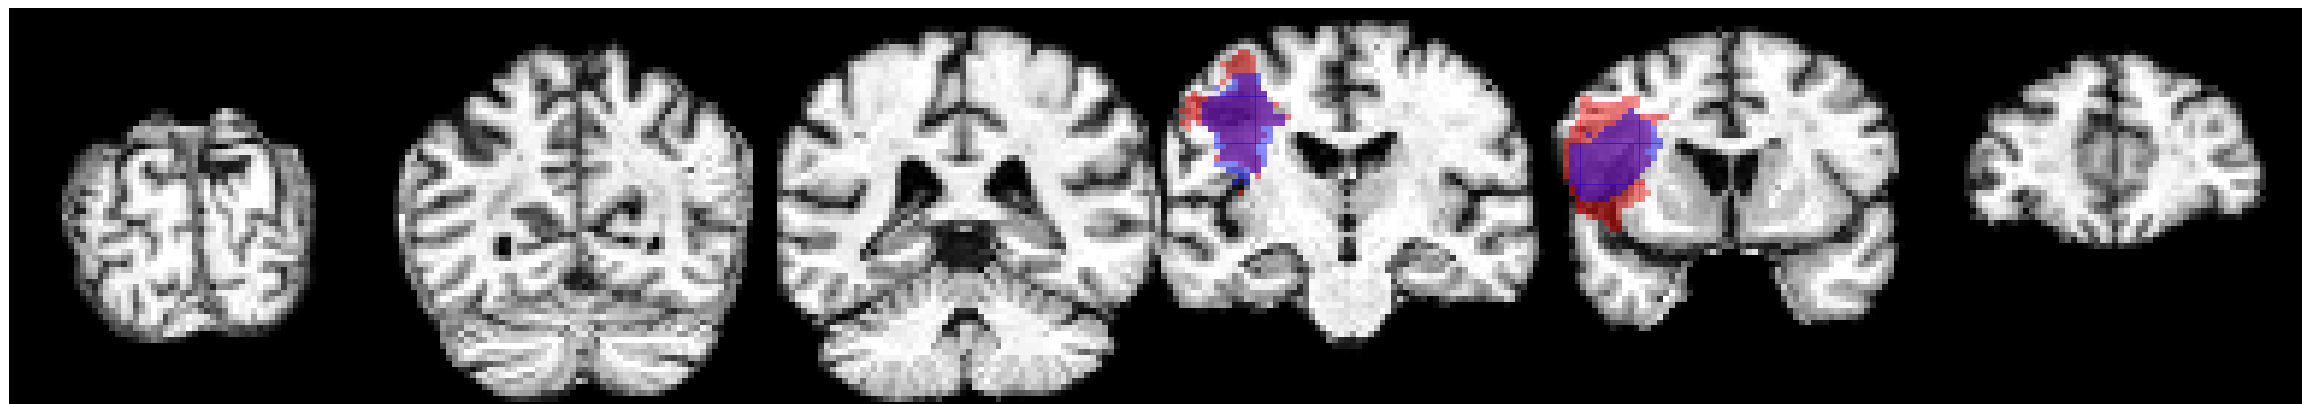



# Subject 41 – MR2323

|                                          | Value |
|------------------------------------------|-------|
| Lesion Volume (ml)                       | 5.888 |
| Dice Coefficient                         | 0.563 |
| Jaccard Coefficient                      | 0.392 |
| Hausdorff Distance (mm)                  | 6.633 |
| Average Displacement (mm)                | 2.278 |
| Sensitivity (Recall, true positive rate) | 0.853 |
| Specificity (true negative rate)         | 0.999 |

Normalized T1

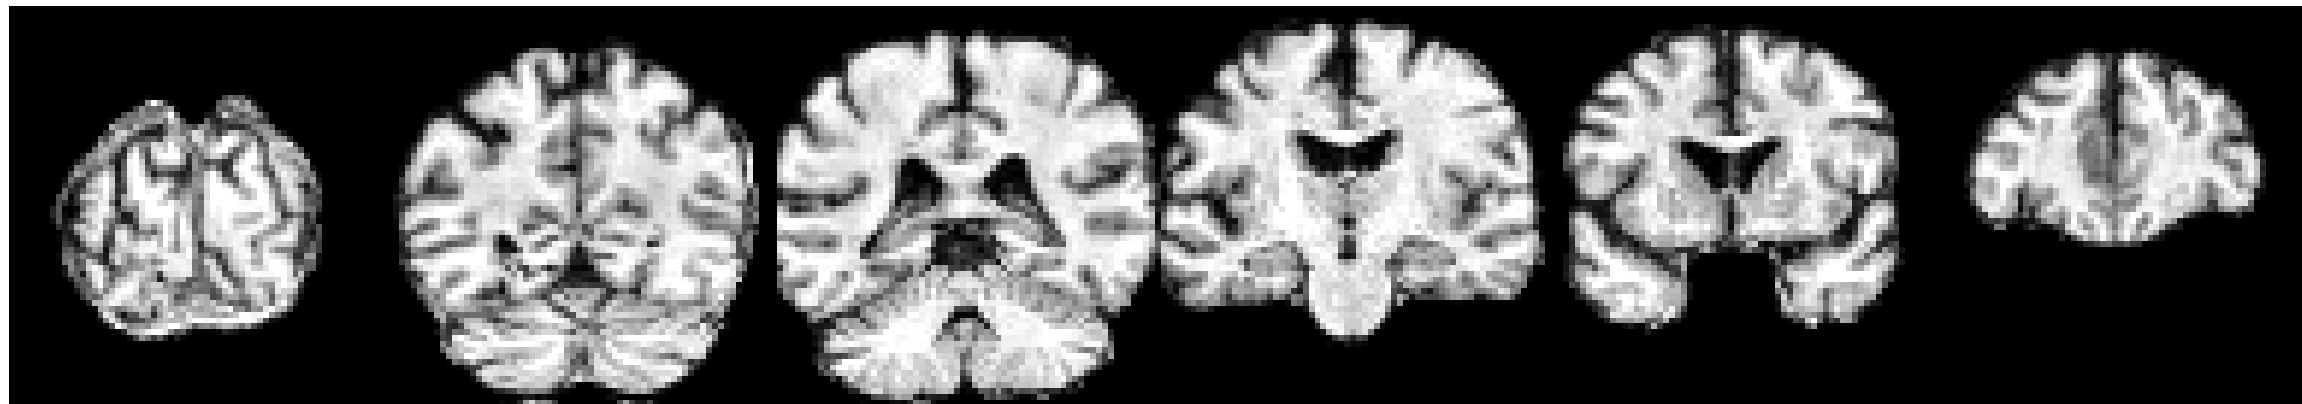

Lesion Overlay

red = Manual Tracing  
blue = LINDA prediction

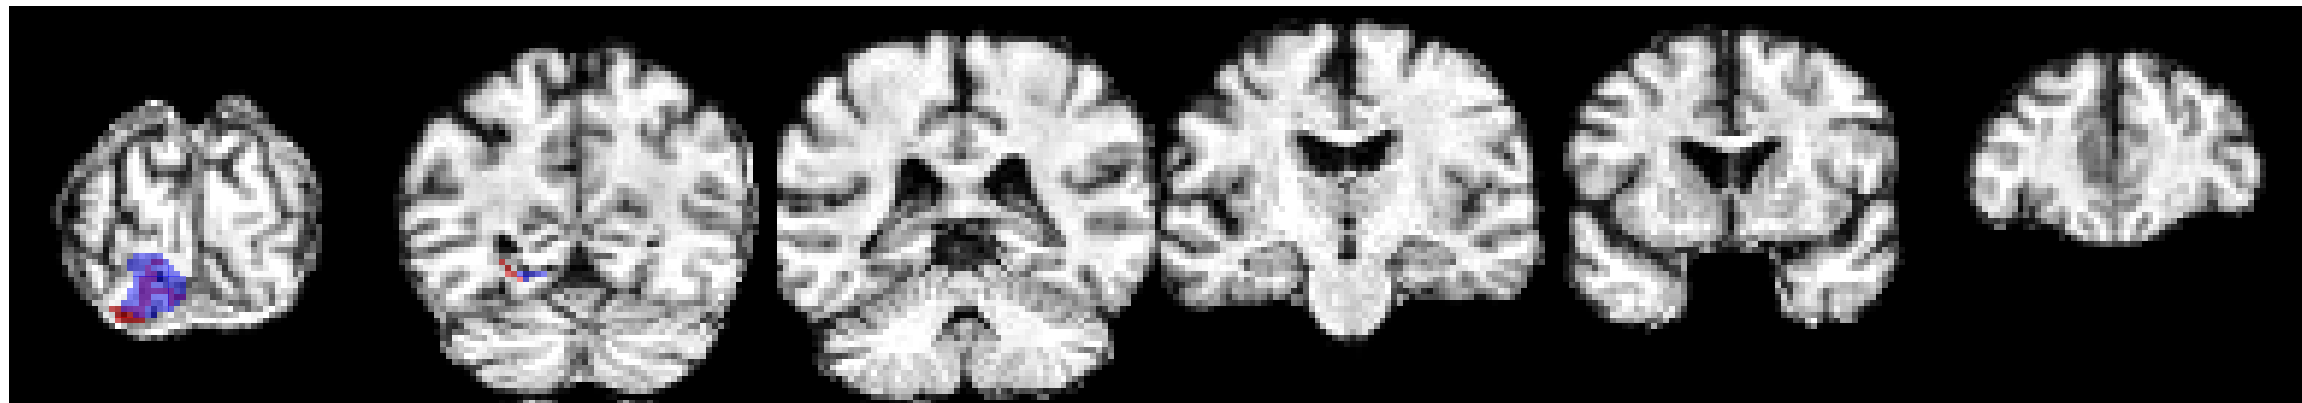

# Subject 42 – MR2328

|                                          | Value   |
|------------------------------------------|---------|
| Lesion Volume (ml)                       | 117.496 |
| Dice Coefficient                         | 0.869   |
| Jaccard Coefficient                      | 0.768   |
| Hausdorff Distance (mm)                  | 9.165   |
| Average Displacement (mm)                | 1.594   |
| Sensitivity (Recall, true positive rate) | 0.834   |
| Specificity (true negative rate)         | 0.999   |

Normalized T1

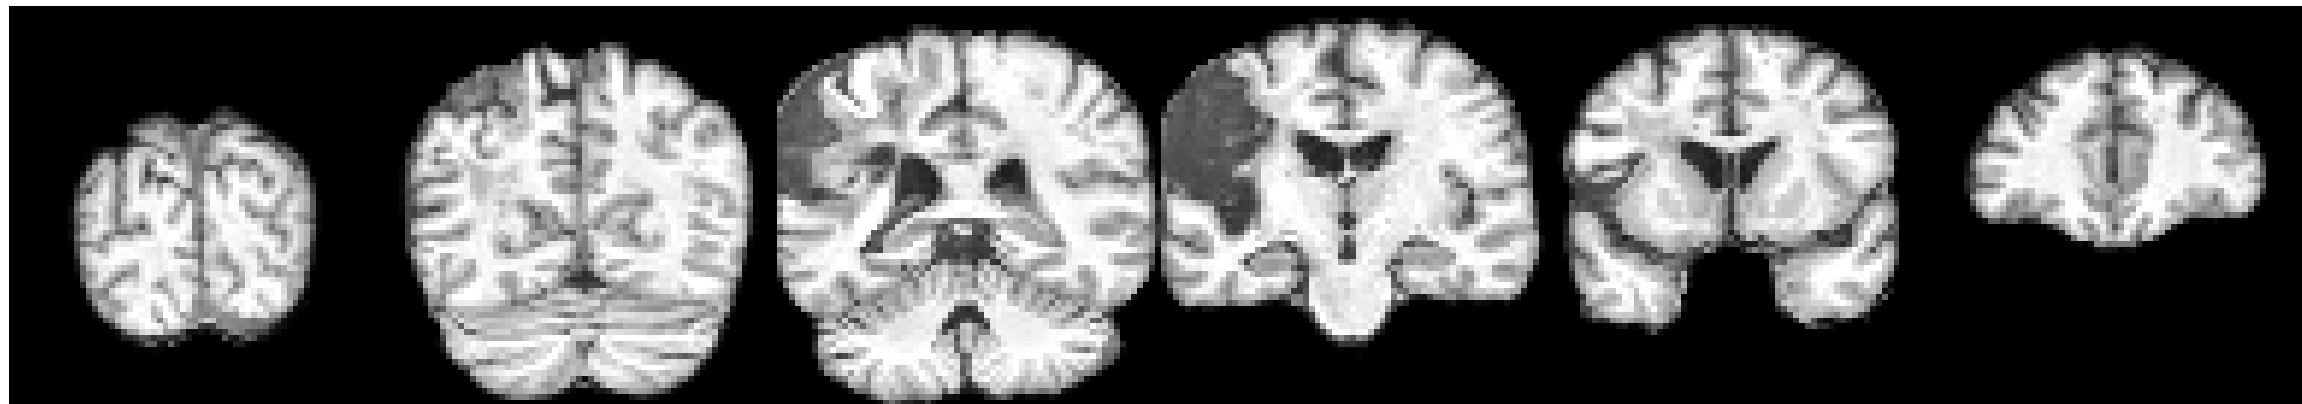

Lesion Overlay

red = Manual Tracing  
blue = LINDA prediction

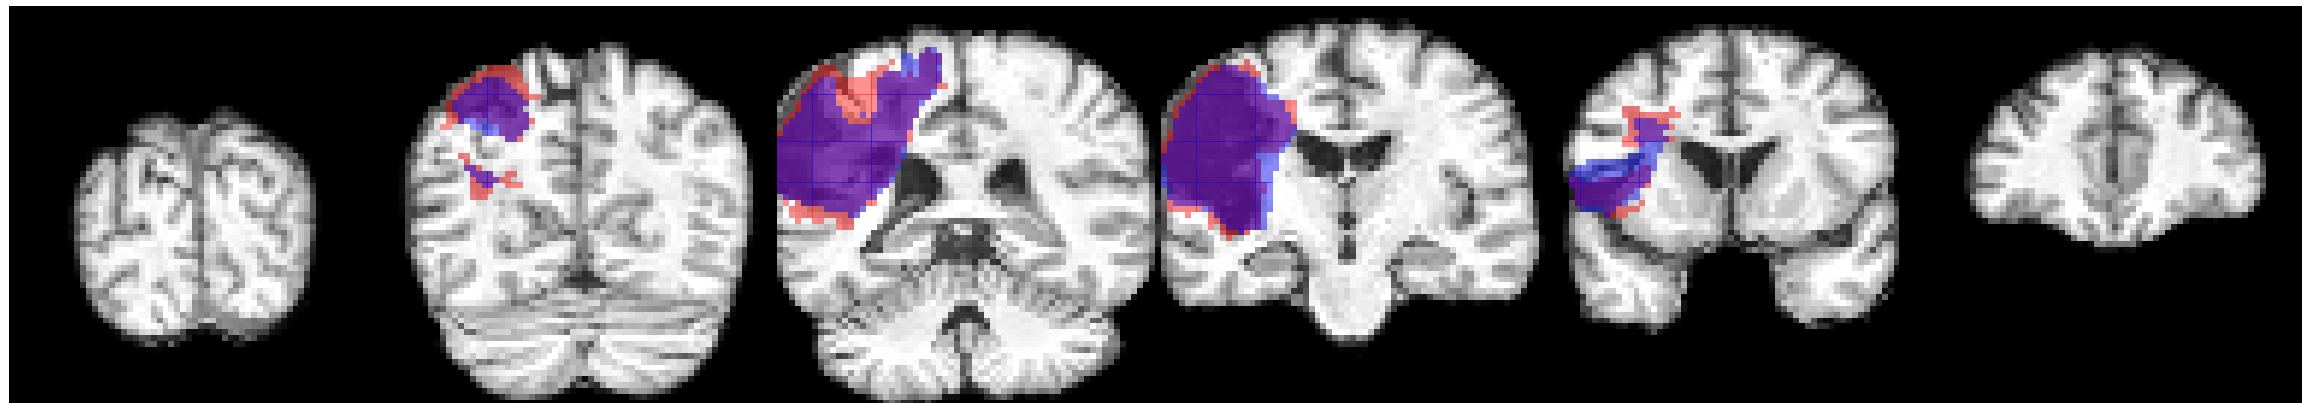

# Subject 43 – MR2340

|                                          | Value  |
|------------------------------------------|--------|
| Lesion Volume (ml)                       | 8.616  |
| Dice Coefficient                         | 0.142  |
| Jaccard Coefficient                      | 0.076  |
| Hausdorff Distance (mm)                  | 59.363 |
| Average Displacement (mm)                | 8.682  |
| Sensitivity (Recall, true positive rate) | 0.076  |
| Specificity (true negative rate)         | 1      |

Normalized T1

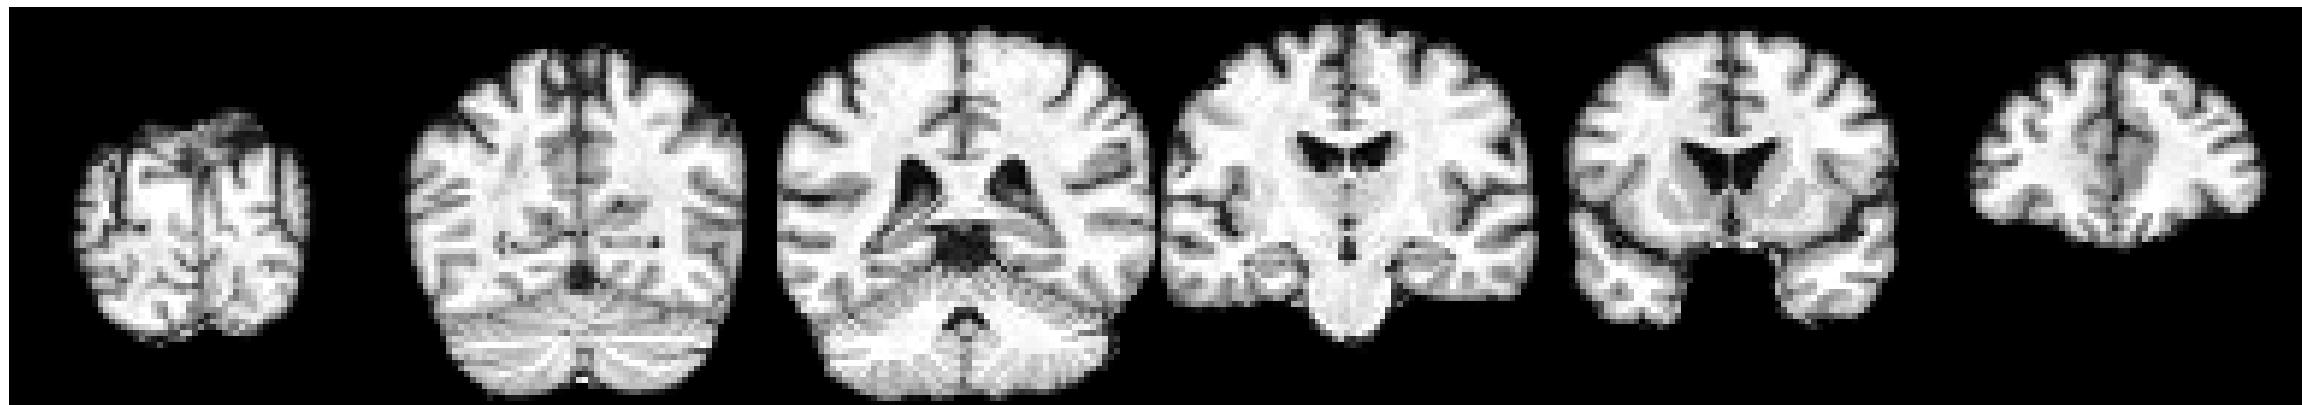

Lesion Overlay

red = Manual Tracing  
blue = LINDA prediction

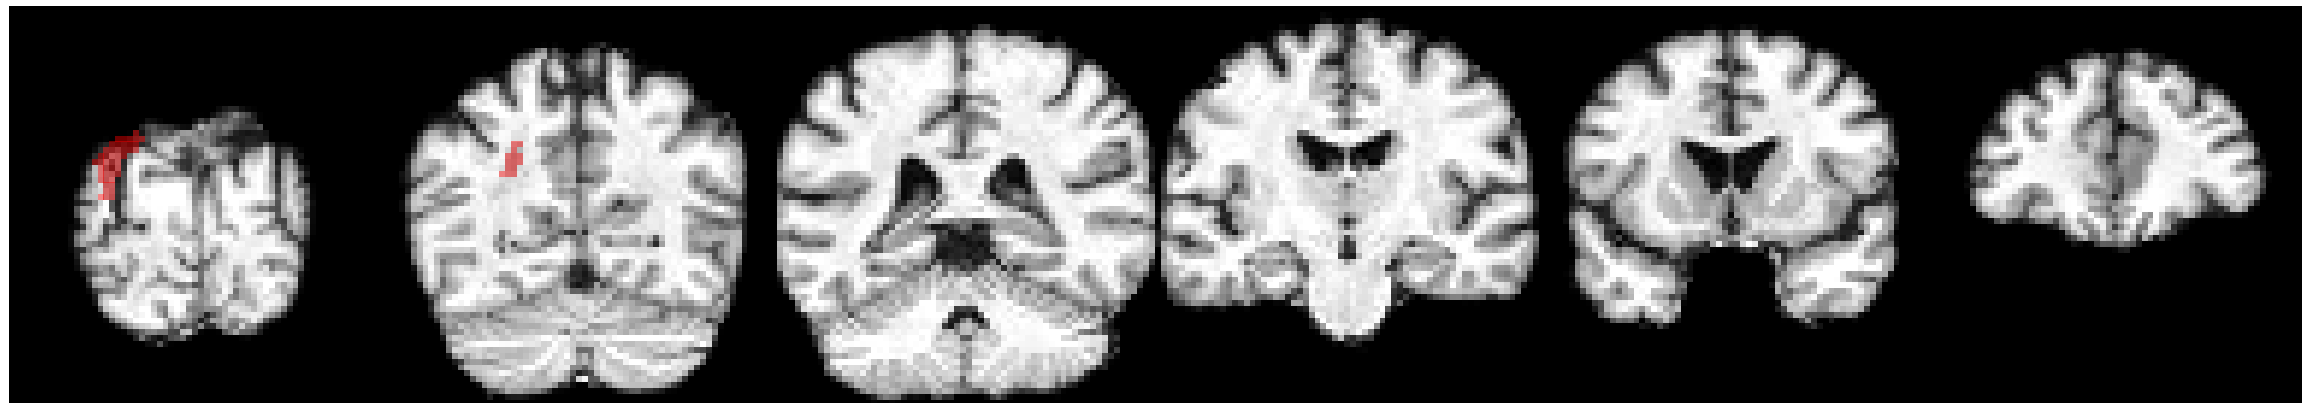

# Subject 44 – MR2350

|                                          | Value  |
|------------------------------------------|--------|
| Lesion Volume (ml)                       | 45.232 |
| Dice Coefficient                         | 0.612  |
| Jaccard Coefficient                      | 0.441  |
| Hausdorff Distance (mm)                  | 17.205 |
| Average Displacement (mm)                | 3.409  |
| Sensitivity (Recall, true positive rate) | 0.524  |
| Specificity (true negative rate)         | 0.999  |

Normalized T1

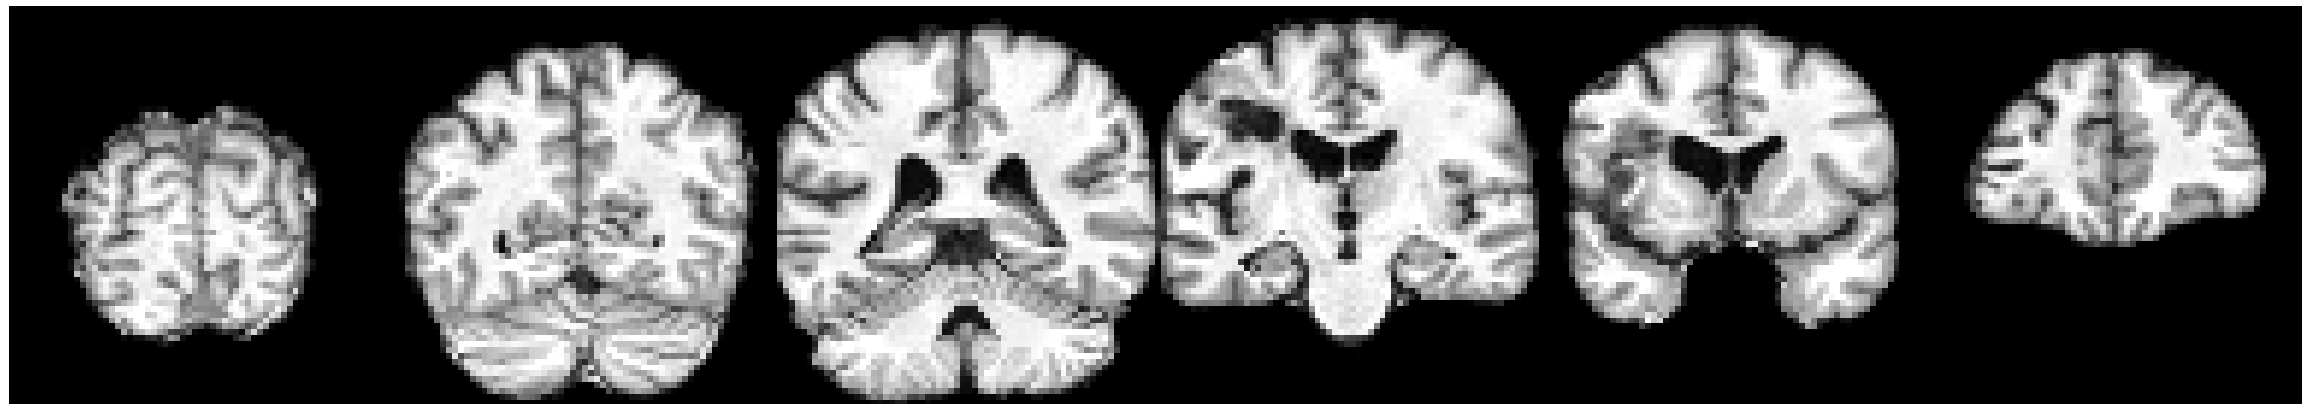

Lesion Overlay

red = Manual Tracing  
blue = LINDA prediction

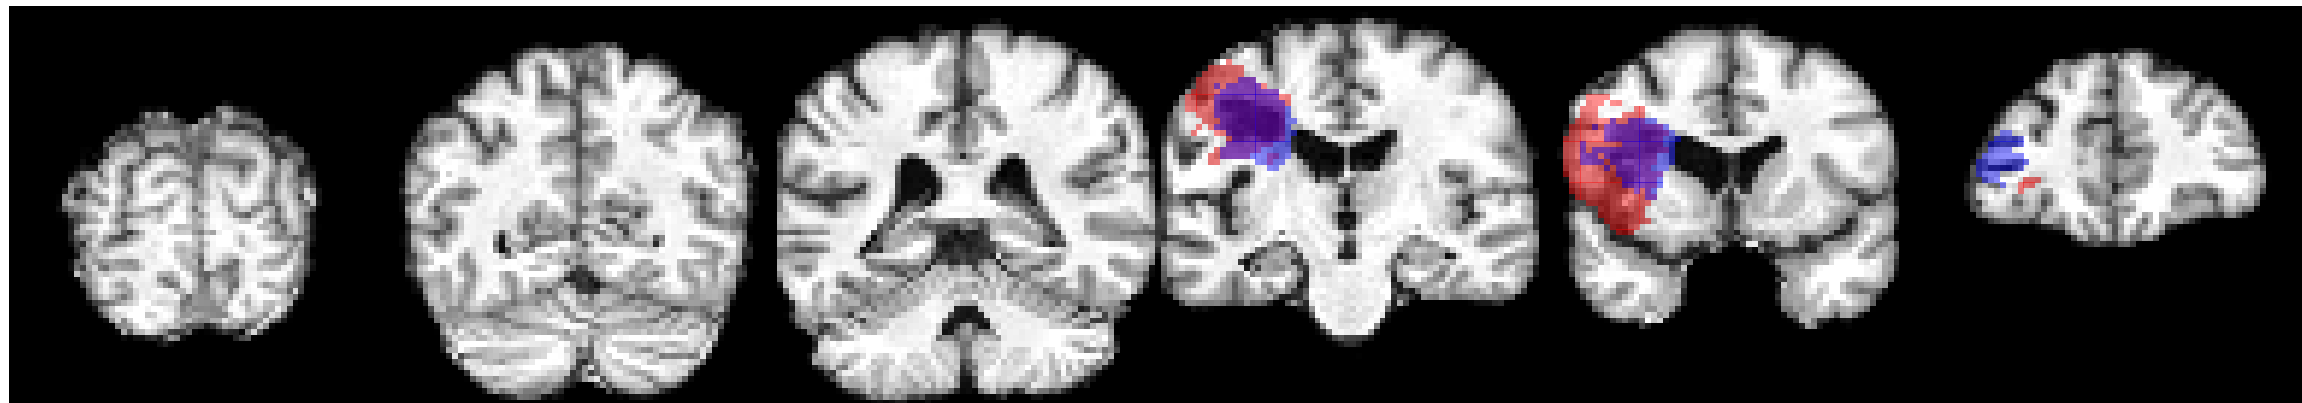

# Subject 45 – MR2378

|                                          | Value  |
|------------------------------------------|--------|
| Lesion Volume (ml)                       | 61.928 |
| Dice Coefficient                         | 0.719  |
| Jaccard Coefficient                      | 0.561  |
| Hausdorff Distance (mm)                  | 15.62  |
| Average Displacement (mm)                | 1.872  |
| Sensitivity (Recall, true positive rate) | 0.669  |
| Specificity (true negative rate)         | 0.998  |

Normalized T1

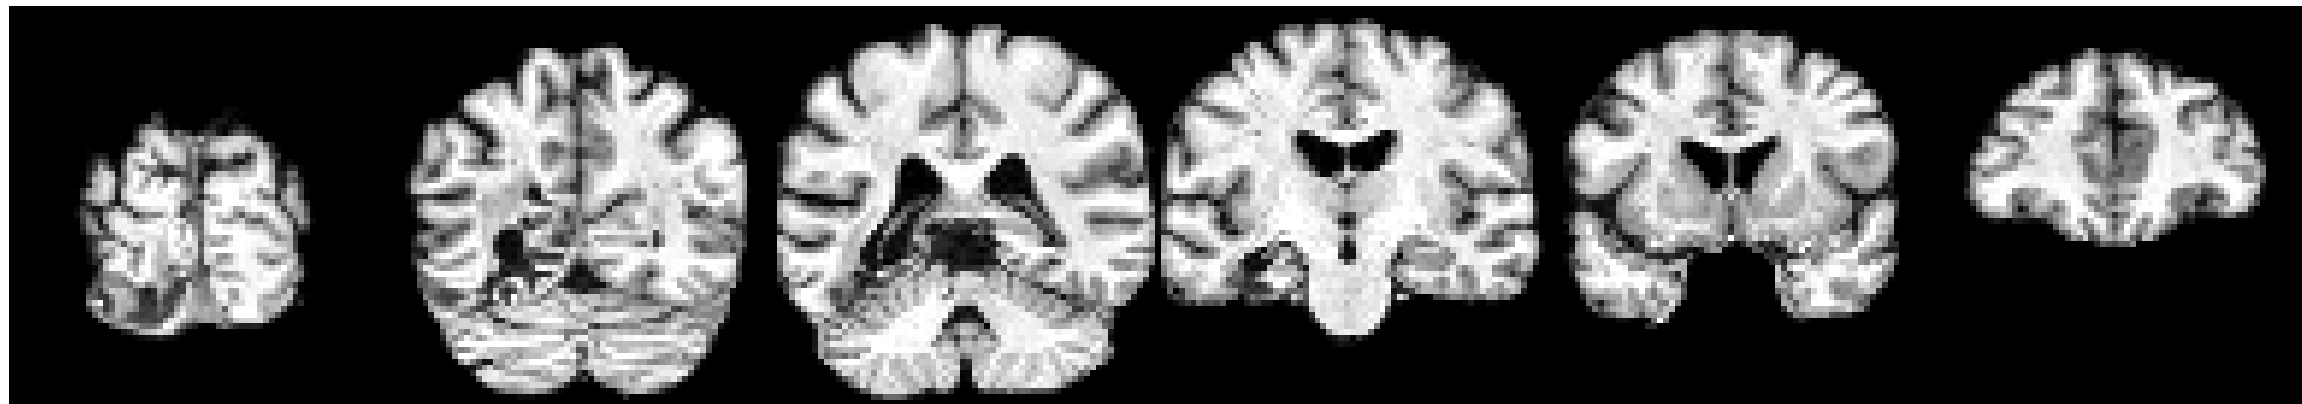

Lesion Overlay

red = Manual Tracing  
blue = LINDA prediction

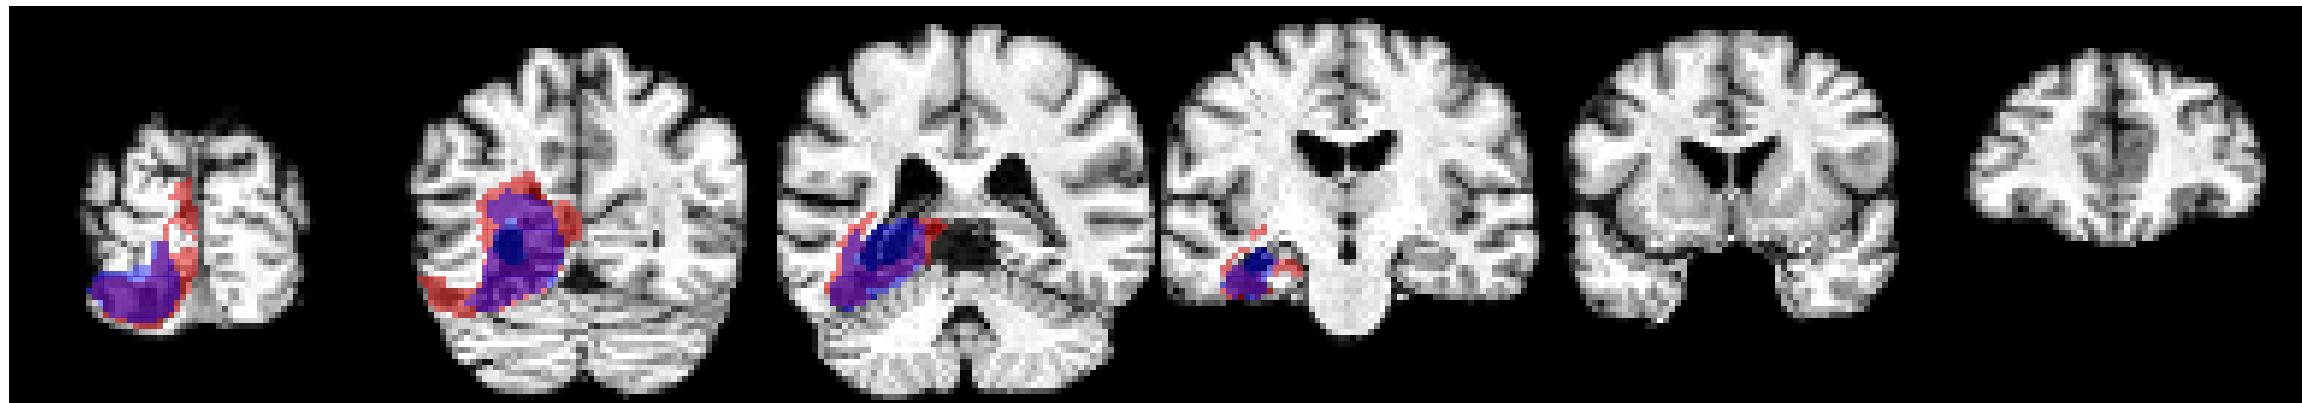

# Subject 46 – MR2464

|                                          | Value  |
|------------------------------------------|--------|
| Lesion Volume (ml)                       | 51.88  |
| Dice Coefficient                         | 0.801  |
| Jaccard Coefficient                      | 0.668  |
| Hausdorff Distance (mm)                  | 10.954 |
| Average Displacement (mm)                | 1.744  |
| Sensitivity (Recall, true positive rate) | 0.789  |
| Specificity (true negative rate)         | 0.999  |

Normalized T1

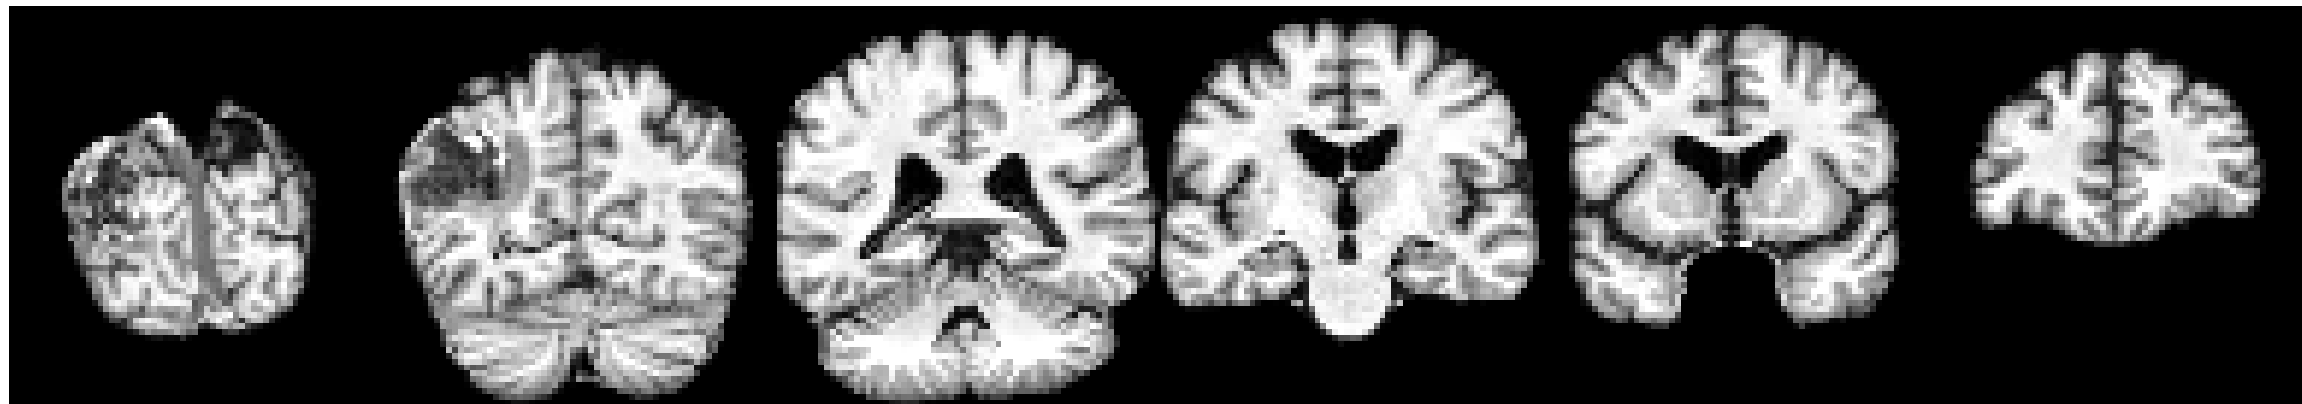

Lesion Overlay

red = Manual Tracing  
blue = LINDA prediction

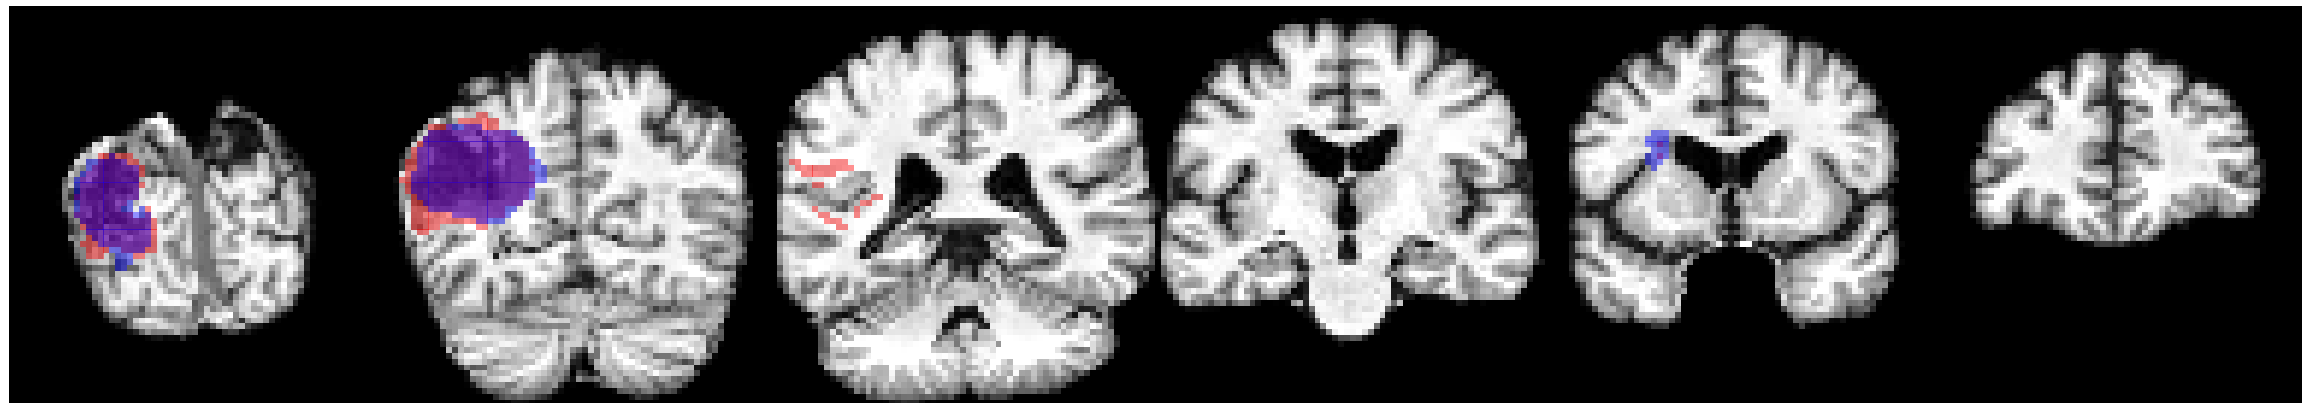

# Subject 47 – MR2481

|                                          | Value  |
|------------------------------------------|--------|
| Lesion Volume (ml)                       | 64.368 |
| Dice Coefficient                         | 0.747  |
| Jaccard Coefficient                      | 0.596  |
| Hausdorff Distance (mm)                  | 12.806 |
| Average Displacement (mm)                | 1.797  |
| Sensitivity (Recall, true positive rate) | 0.707  |
| Specificity (true negative rate)         | 0.998  |

Normalized T1

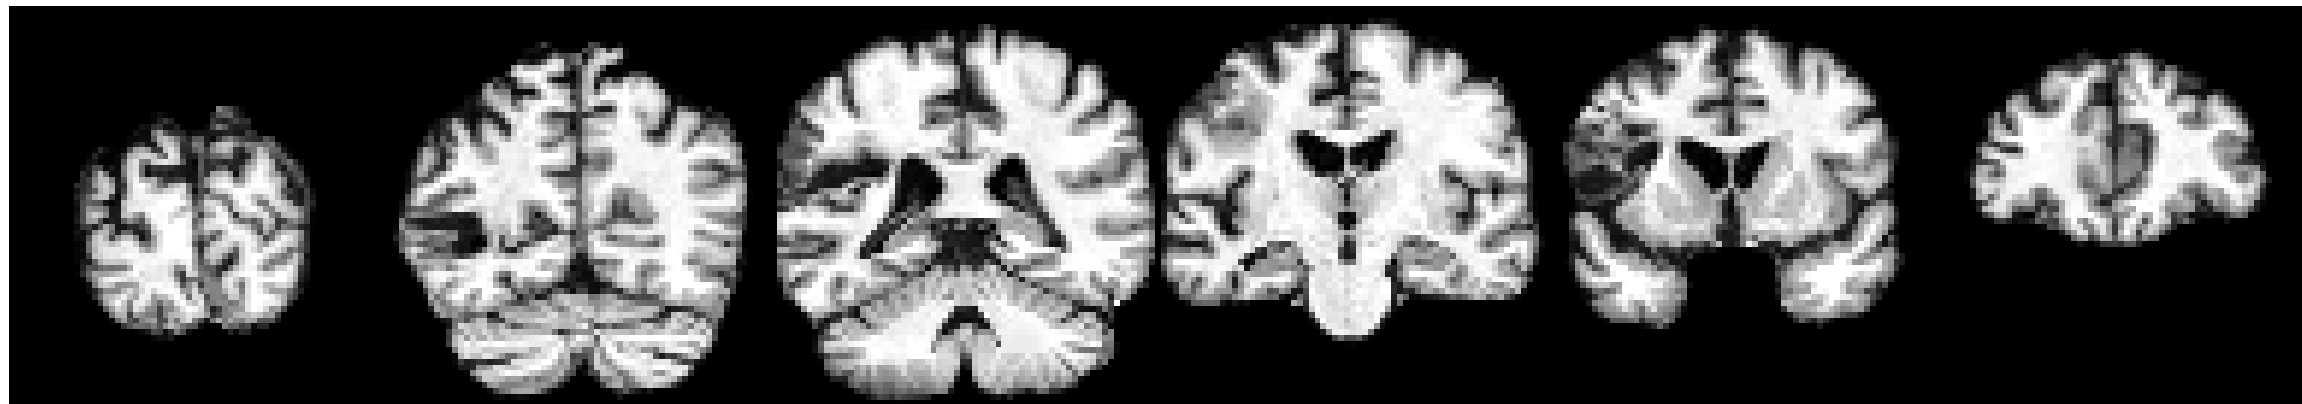

Lesion Overlay

red = Manual Tracing  
blue = LINDA prediction

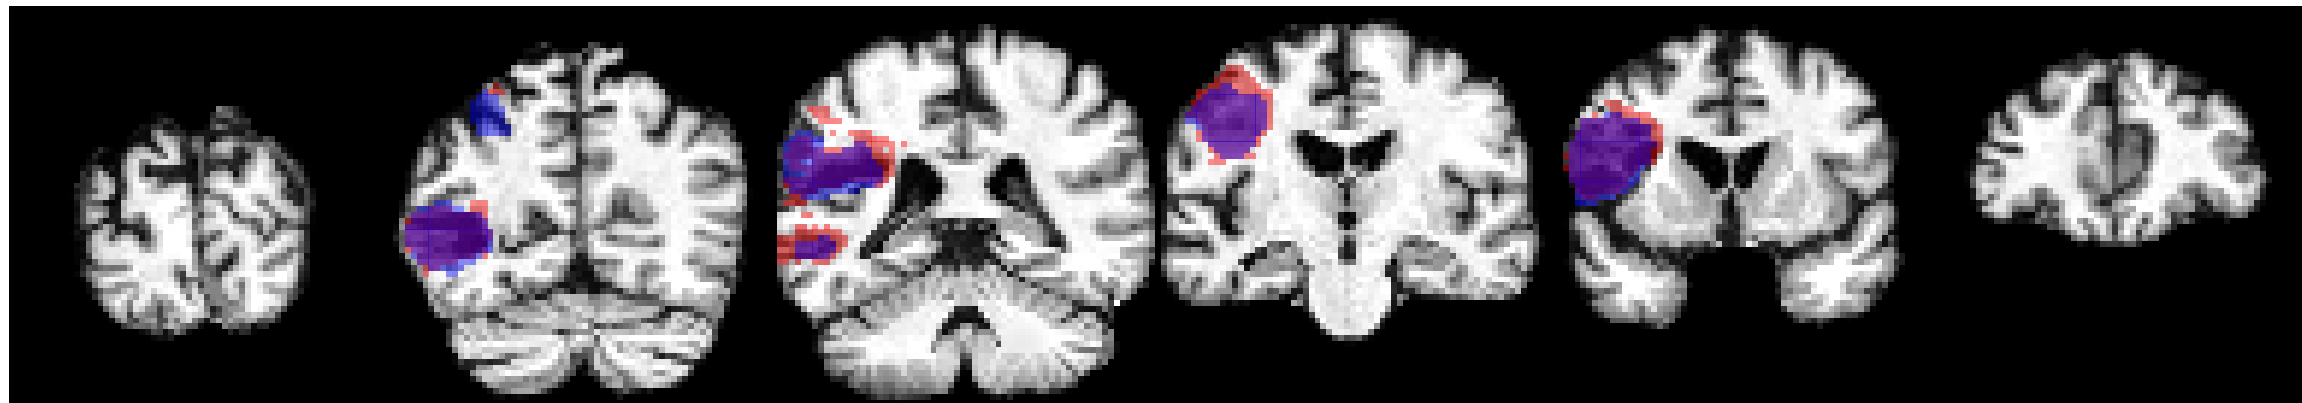

# Subject 48 – MR2493

|                                          | Value  |
|------------------------------------------|--------|
| Lesion Volume (ml)                       | 21.304 |
| Dice Coefficient                         | 0.599  |
| Jaccard Coefficient                      | 0.428  |
| Hausdorff Distance (mm)                  | 25.456 |
| Average Displacement (mm)                | 3.021  |
| Sensitivity (Recall, true positive rate) | 0.654  |
| Specificity (true negative rate)         | 0.999  |

Normalized T1

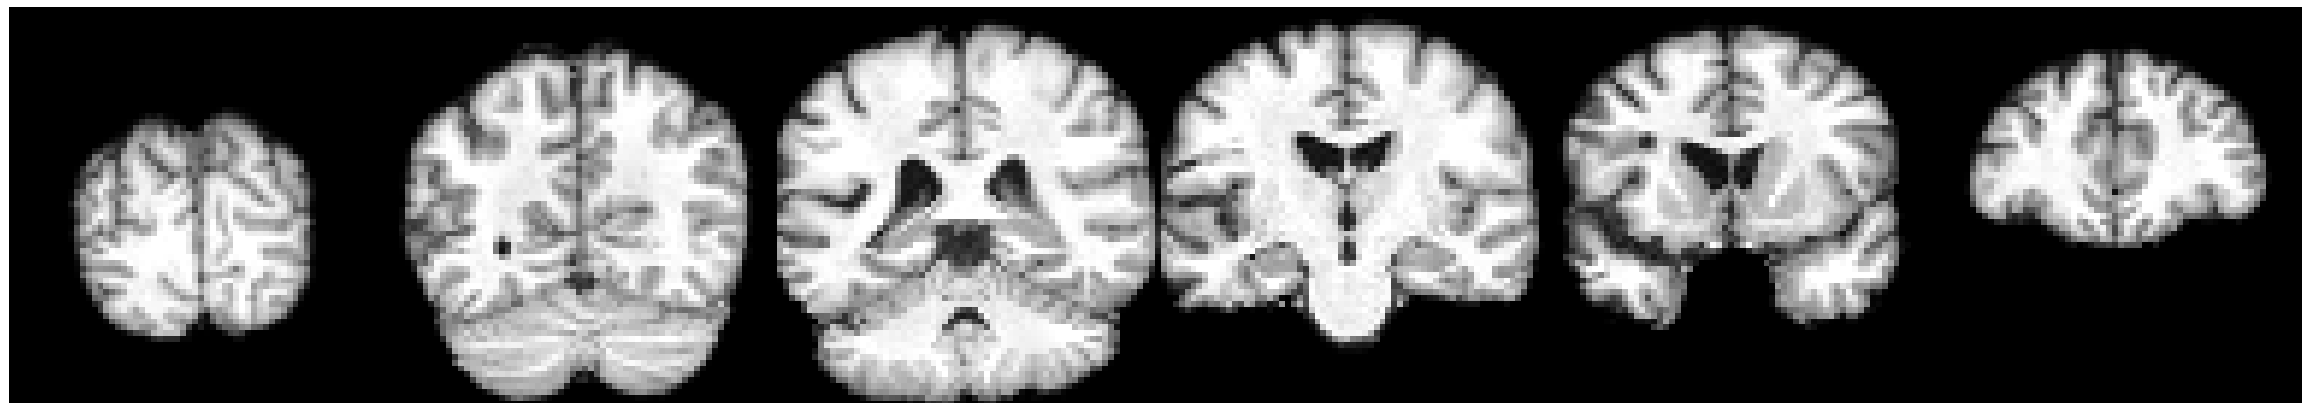

Lesion Overlay

red = Manual Tracing  
blue = LINDA prediction

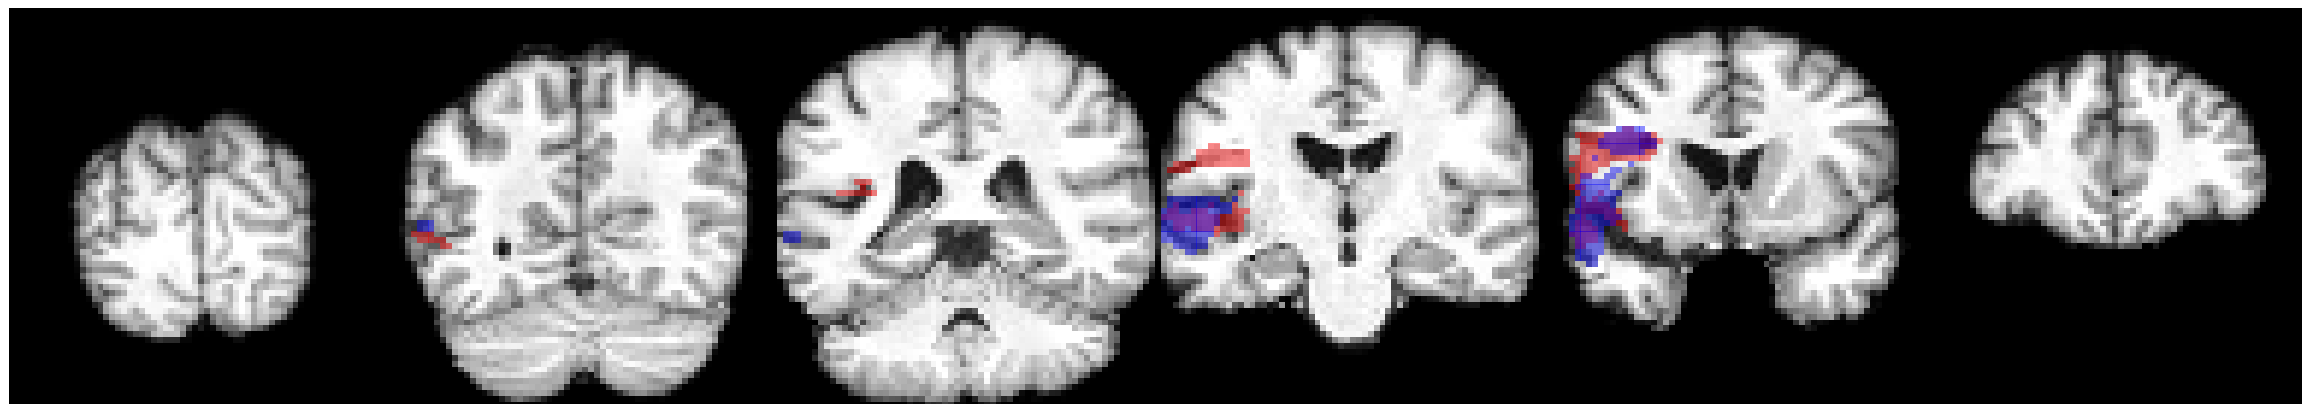



# Subject 49 – MR2516

|                                          | Value  |
|------------------------------------------|--------|
| Lesion Volume (ml)                       | 98.344 |
| Dice Coefficient                         | 0.779  |
| Jaccard Coefficient                      | 0.637  |
| Hausdorff Distance (mm)                  | 25.14  |
| Average Displacement (mm)                | 2.639  |
| Sensitivity (Recall, true positive rate) | 0.849  |
| Specificity (true negative rate)         | 0.996  |

Normalized T1

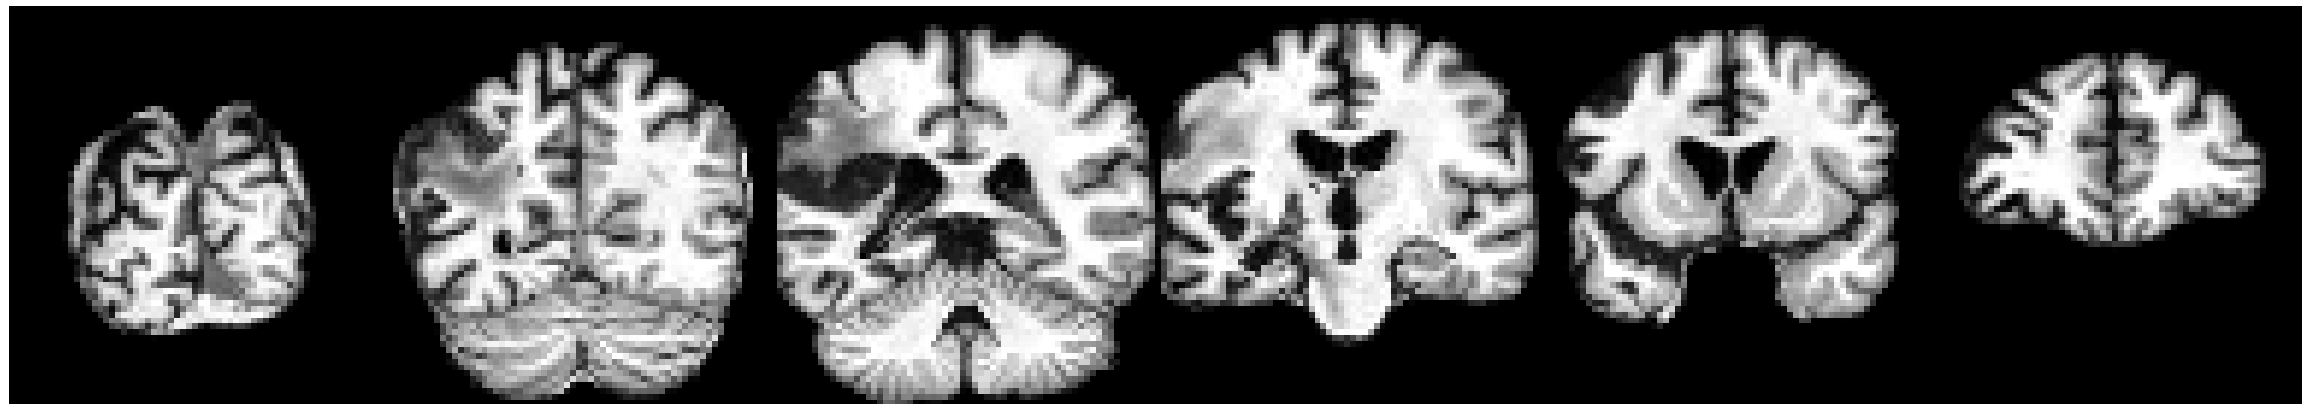

Lesion Overlay

red = Manual Tracing  
blue = LINDA prediction

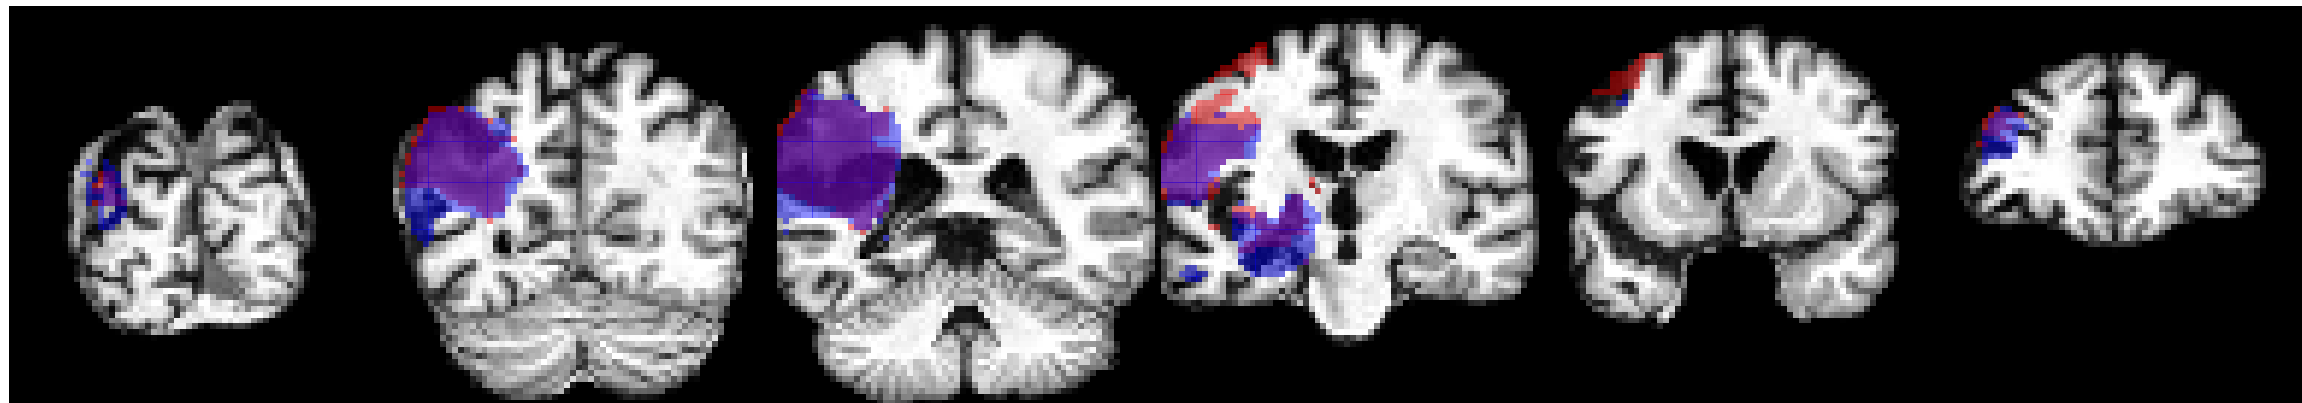

## Subject 50 – MR2548

|                                          | Value  |
|------------------------------------------|--------|
| Lesion Volume (ml)                       | 71.464 |
| Dice Coefficient                         | 0.814  |
| Jaccard Coefficient                      | 0.686  |
| Hausdorff Distance (mm)                  | 15.62  |
| Average Displacement (mm)                | 2.098  |
| Sensitivity (Recall, true positive rate) | 0.728  |
| Specificity (true negative rate)         | 0.999  |

Normalized T1

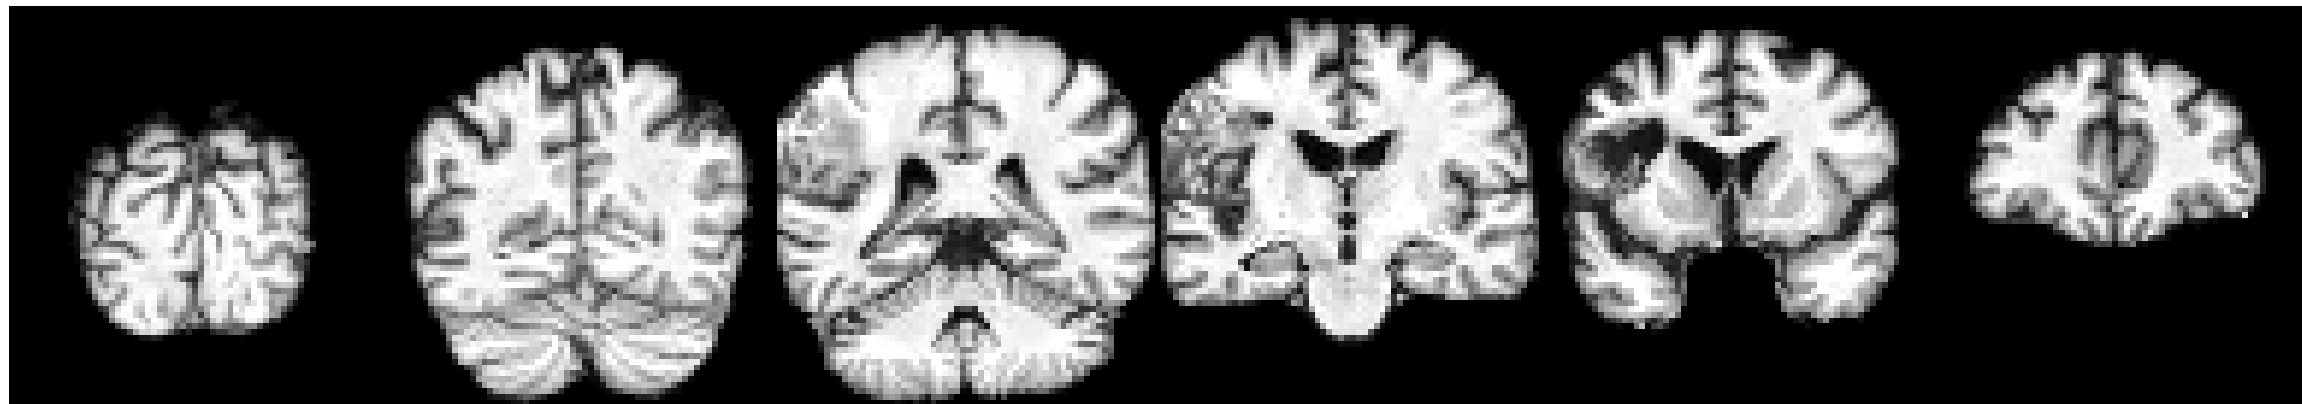

Lesion Overlay

red = Manual Tracing  
blue = LINDA prediction

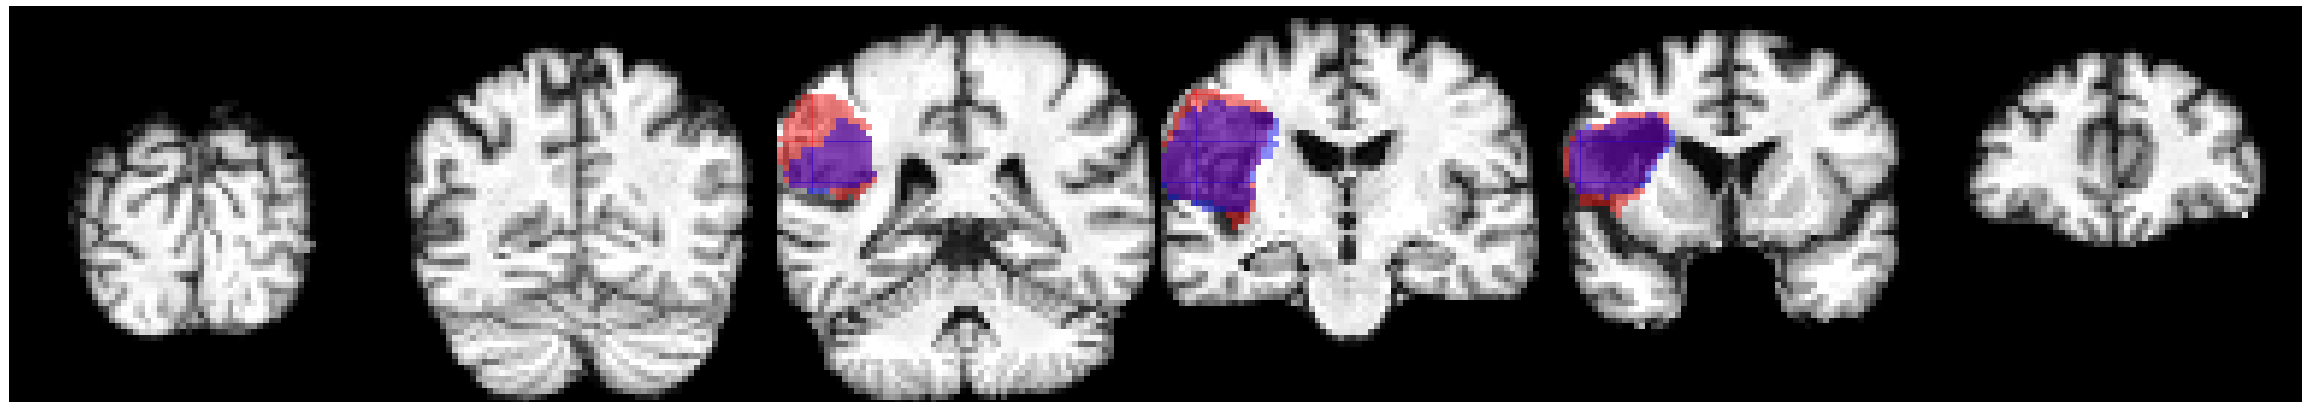

## Subject 51 – MR2549

|                                          | Value  |
|------------------------------------------|--------|
| Lesion Volume (ml)                       | 158.08 |
| Dice Coefficient                         | 0.855  |
| Jaccard Coefficient                      | 0.747  |
| Hausdorff Distance (mm)                  | 15.232 |
| Average Displacement (mm)                | 1.628  |
| Sensitivity (Recall, true positive rate) | 0.849  |
| Specificity (true negative rate)         | 0.997  |

Normalized T1

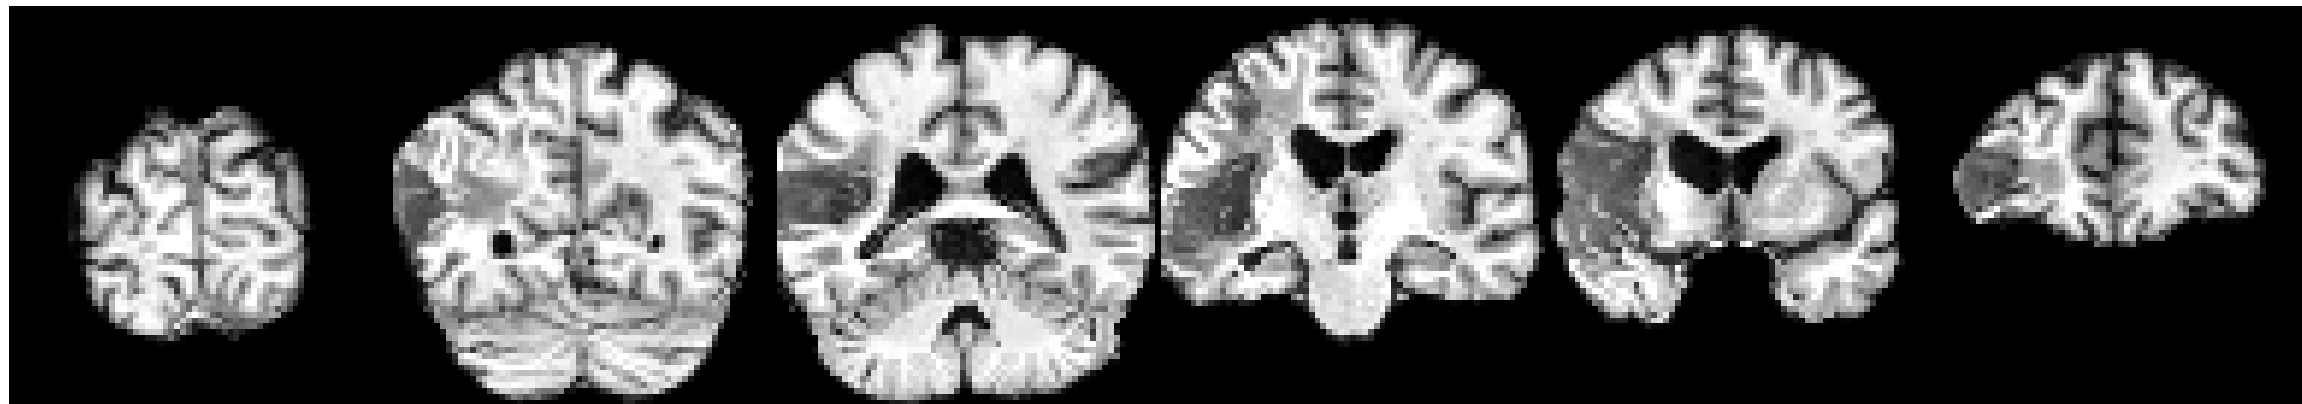

Lesion Overlay

red = Manual Tracing  
blue = LINDA prediction

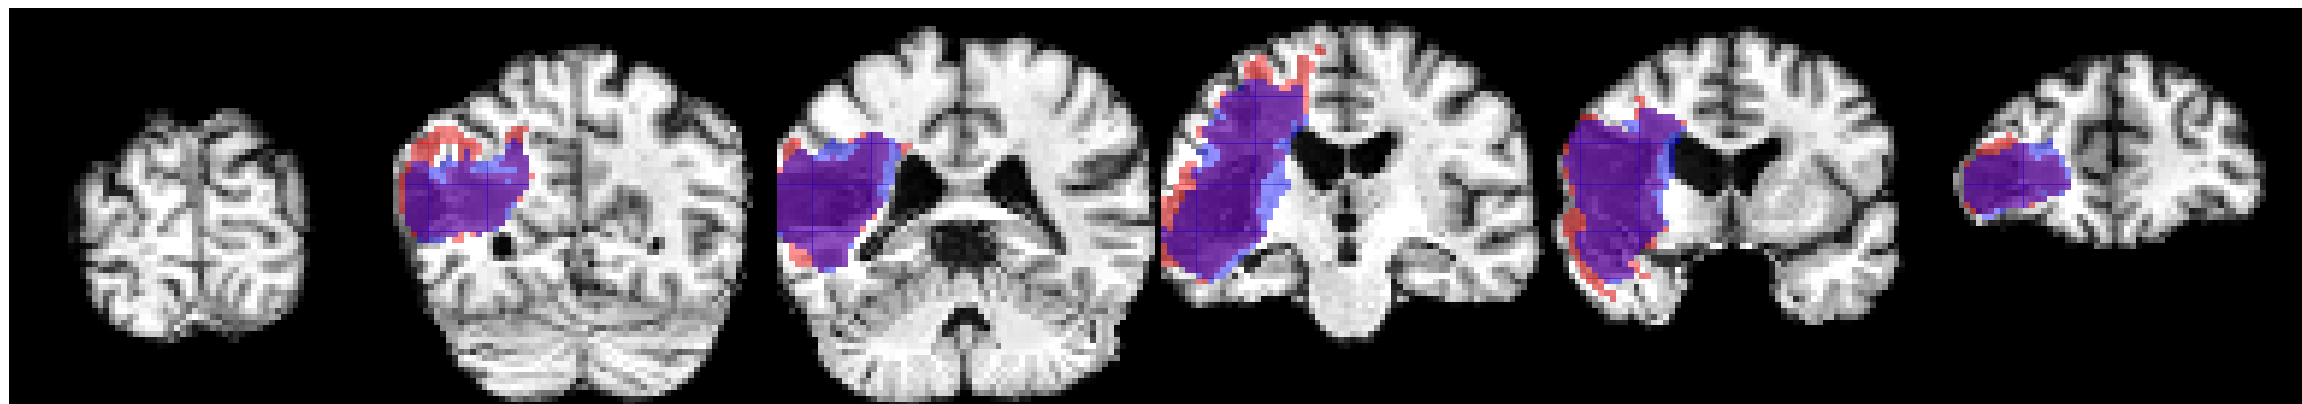

# Subject 52 – MR2567

|                                          | Value  |
|------------------------------------------|--------|
| Lesion Volume (ml)                       | 97.008 |
| Dice Coefficient                         | 0.65   |
| Jaccard Coefficient                      | 0.482  |
| Hausdorff Distance (mm)                  | 24.658 |
| Average Displacement (mm)                | 2.965  |
| Sensitivity (Recall, true positive rate) | 0.539  |
| Specificity (true negative rate)         | 0.999  |

Normalized T1

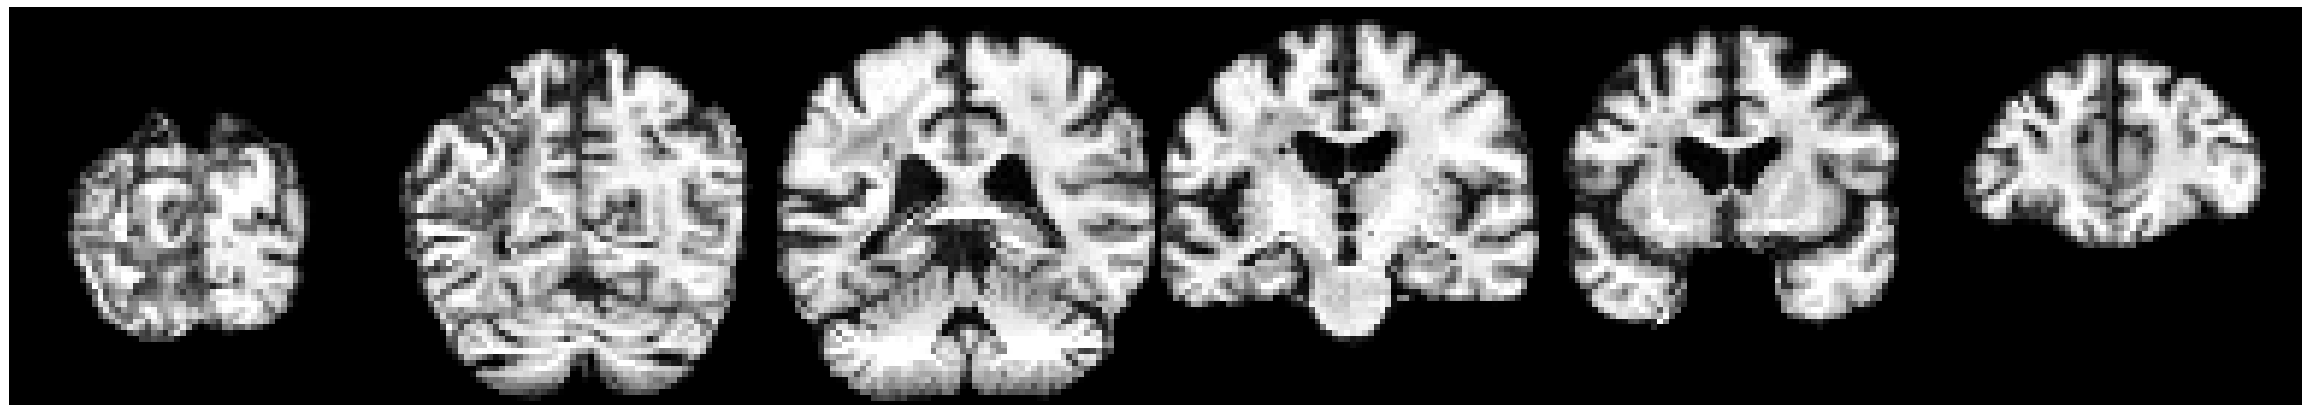

Lesion Overlay

red = Manual Tracing  
blue = LINDA prediction

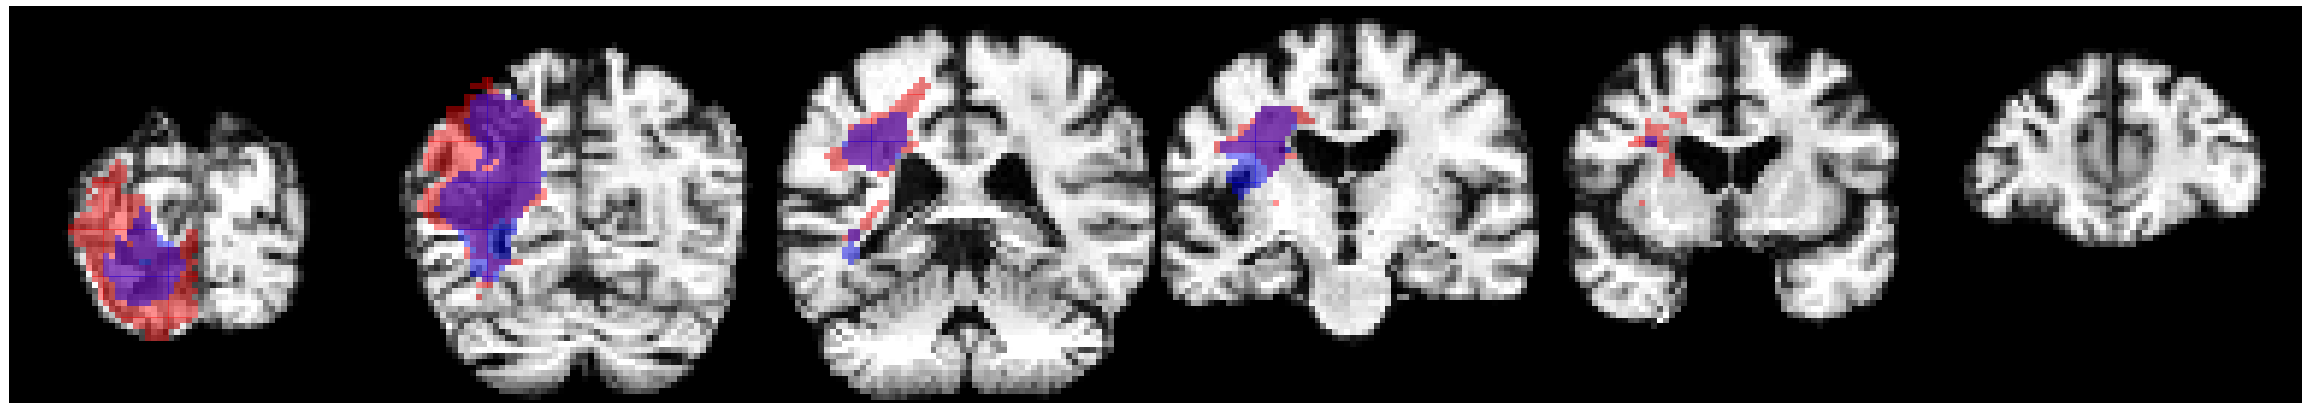

# Subject 53 – MRG0188

|                                          | Value  |
|------------------------------------------|--------|
| Lesion Volume (ml)                       | 8.016  |
| Dice Coefficient                         | 0.294  |
| Jaccard Coefficient                      | 0.172  |
| Hausdorff Distance (mm)                  | 25.377 |
| Average Displacement (mm)                | 6.071  |
| Sensitivity (Recall, true positive rate) | 0.951  |
| Specificity (true negative rate)         | 0.995  |

Normalized T1

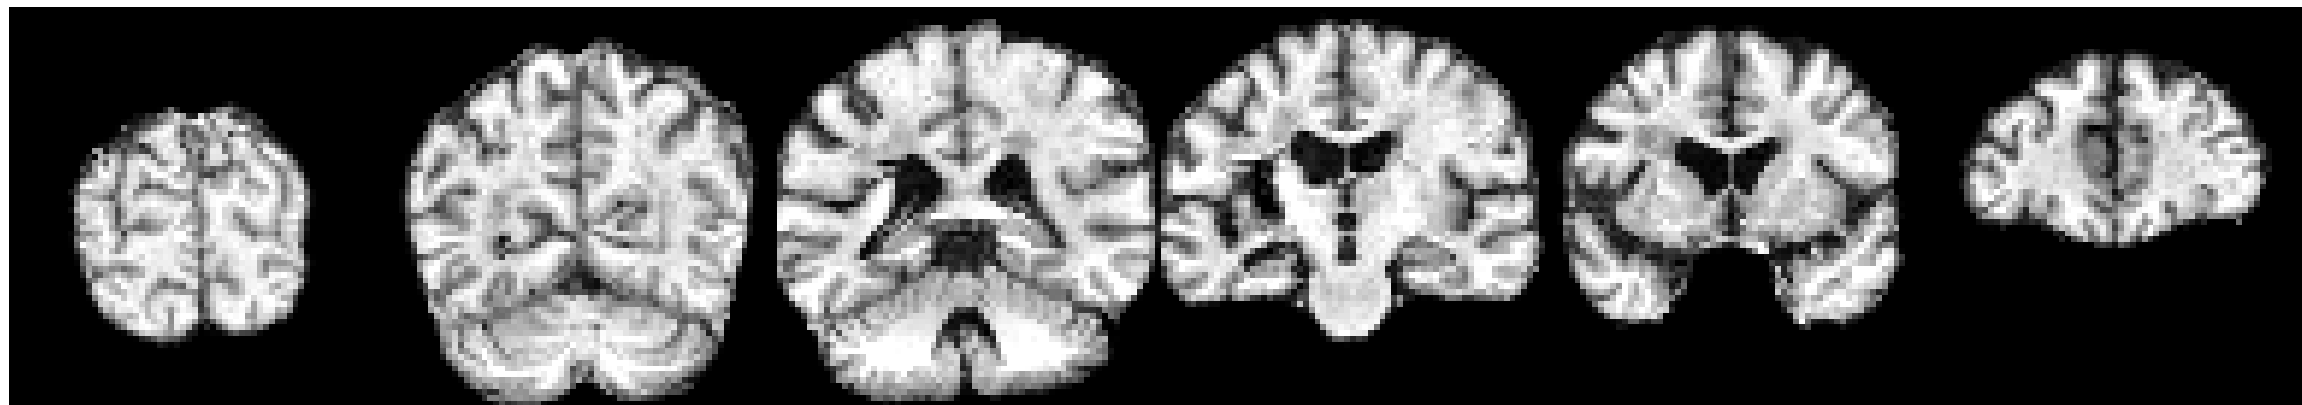

Lesion Overlay

red = Manual Tracing  
blue = LINDA prediction

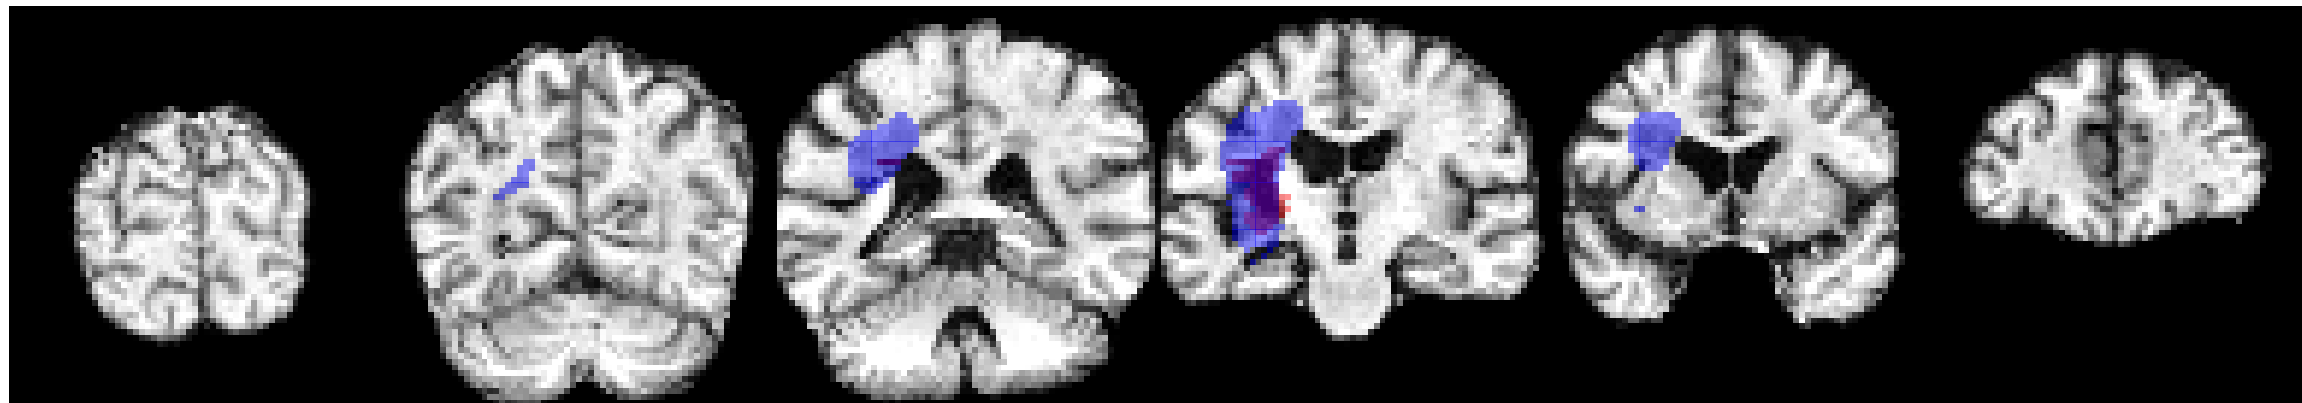

# Subject 54 – XMR5490

|                                          | Value  |
|------------------------------------------|--------|
| Lesion Volume (ml)                       | 18.44  |
| Dice Coefficient                         | 0.703  |
| Jaccard Coefficient                      | 0.542  |
| Hausdorff Distance (mm)                  | 10.198 |
| Average Displacement (mm)                | 1.631  |
| Sensitivity (Recall, true positive rate) | 0.695  |
| Specificity (true negative rate)         | 0.999  |

Normalized T1

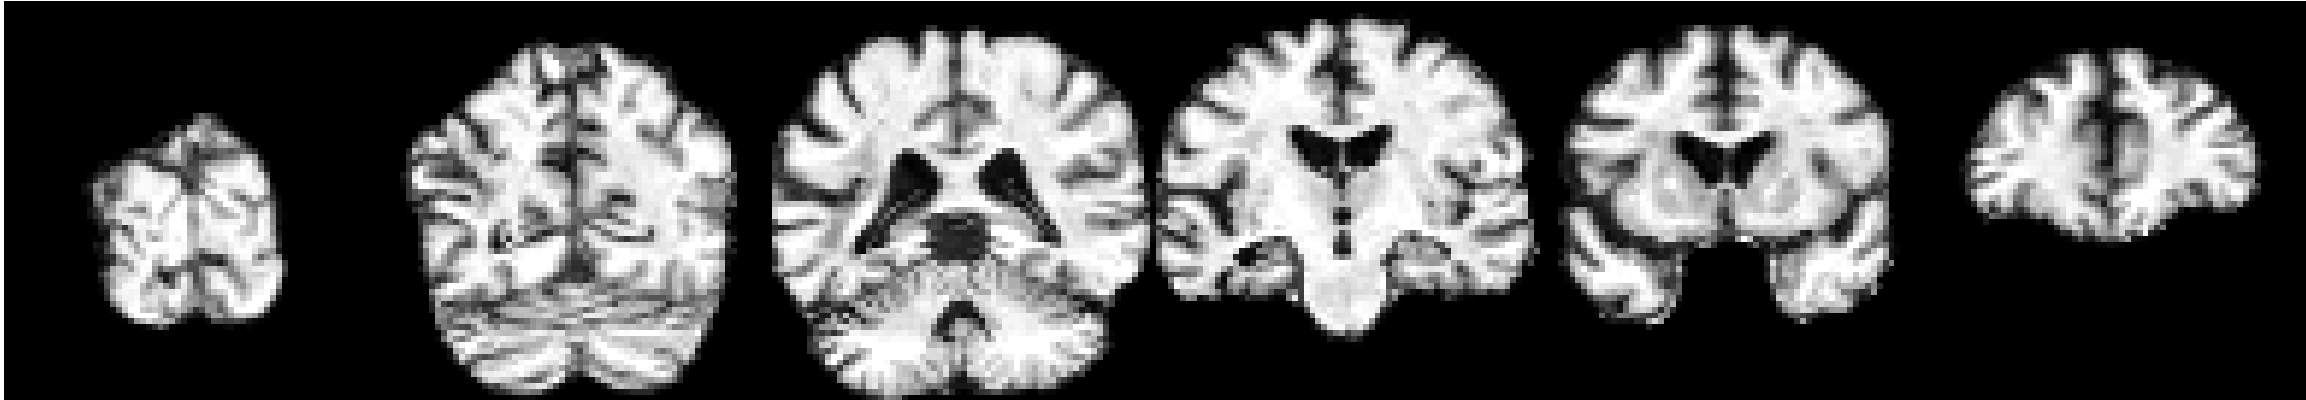

Lesion Overlay

red = Manual Tracing  
blue = LINDA prediction

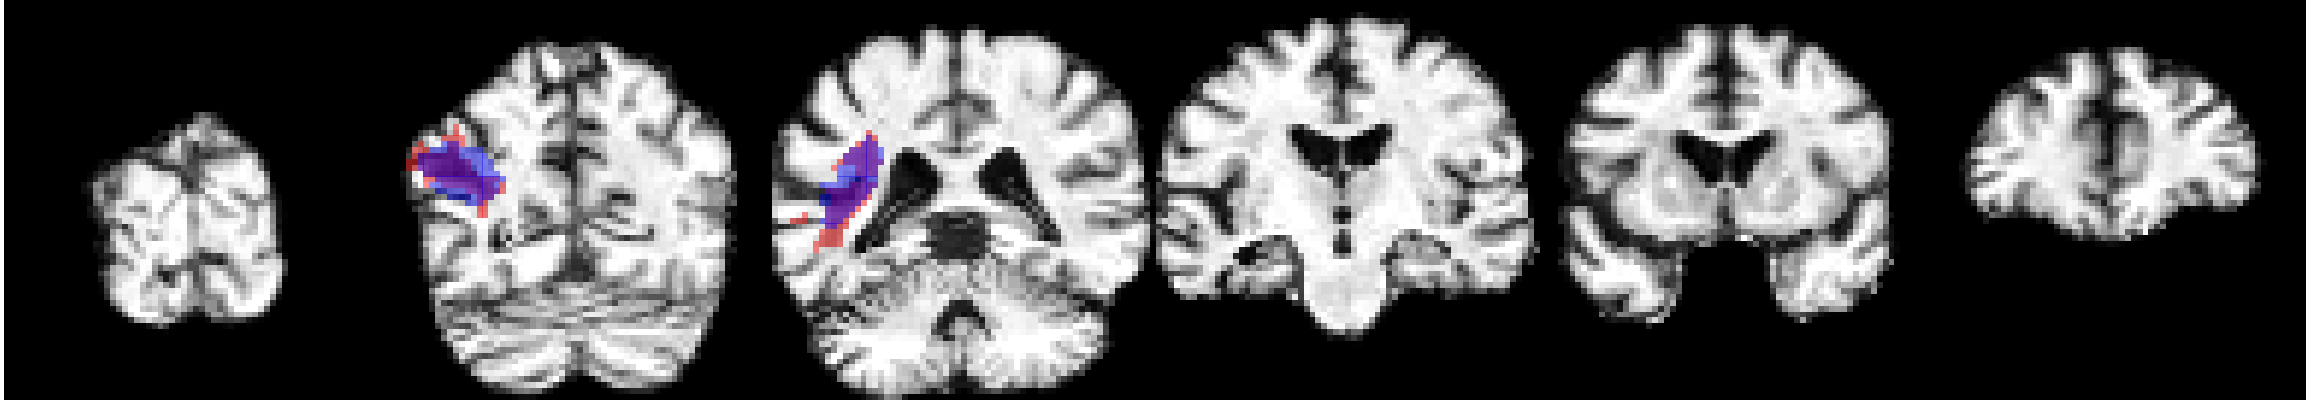

# Subject 55 – XMR7055

|                                          | Value  |
|------------------------------------------|--------|
| Lesion Volume (ml)                       | 61.048 |
| Dice Coefficient                         | 0.377  |
| Jaccard Coefficient                      | 0.232  |
| Hausdorff Distance (mm)                  | 24.249 |
| Average Displacement (mm)                | 3.867  |
| Sensitivity (Recall, true positive rate) | 0.268  |
| Specificity (true negative rate)         | 0.999  |

Normalized T1

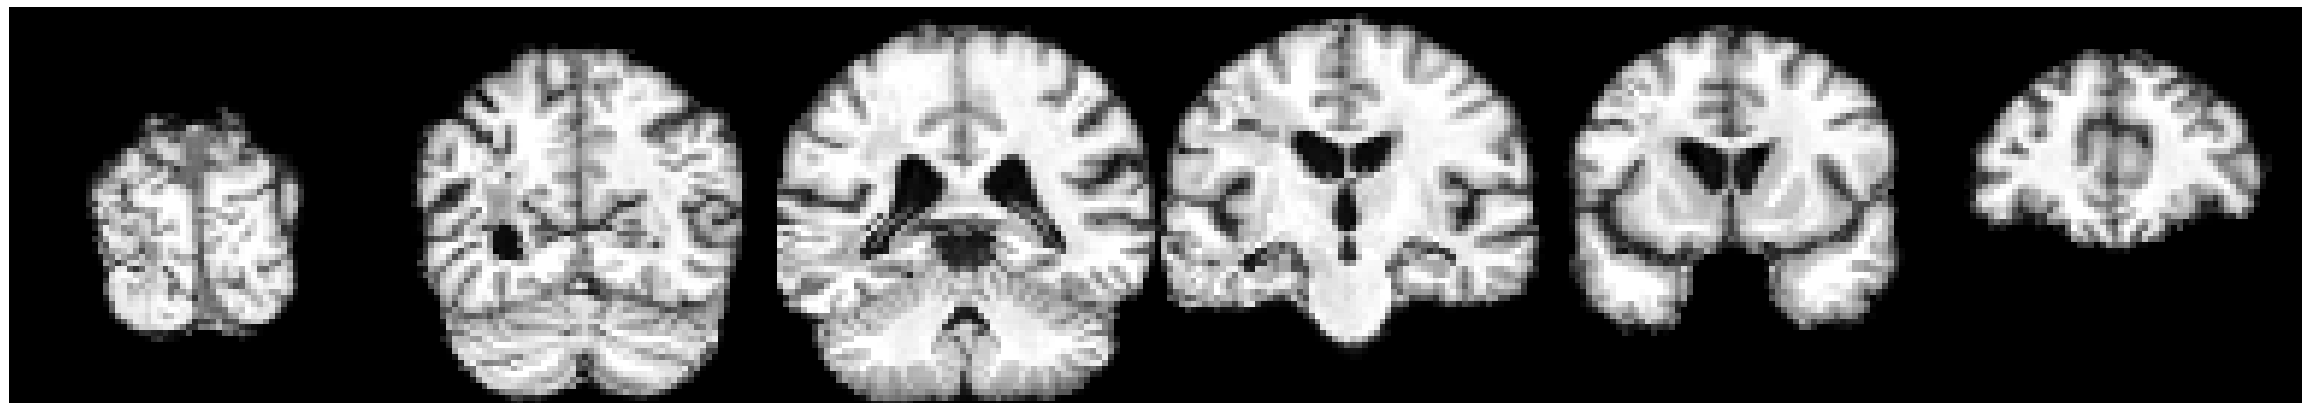

Lesion Overlay

red = Manual Tracing  
blue = LINDA prediction

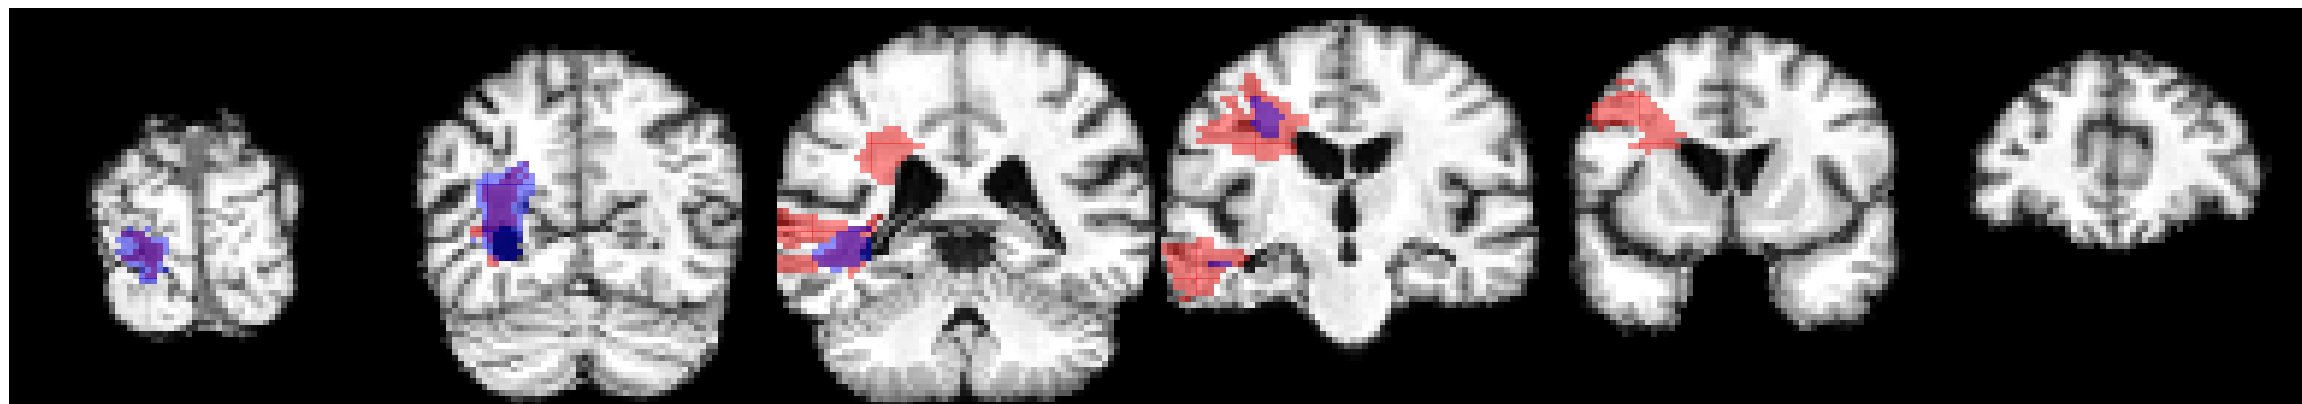

# Subject 56 – XO2540

|                                          | Value  |
|------------------------------------------|--------|
| Lesion Volume (ml)                       | 32.848 |
| Dice Coefficient                         | 0.68   |
| Jaccard Coefficient                      | 0.515  |
| Hausdorff Distance (mm)                  | 29.257 |
| Average Displacement (mm)                | 2.903  |
| Sensitivity (Recall, true positive rate) | 0.617  |
| Specificity (true negative rate)         | 0.999  |

Normalized T1

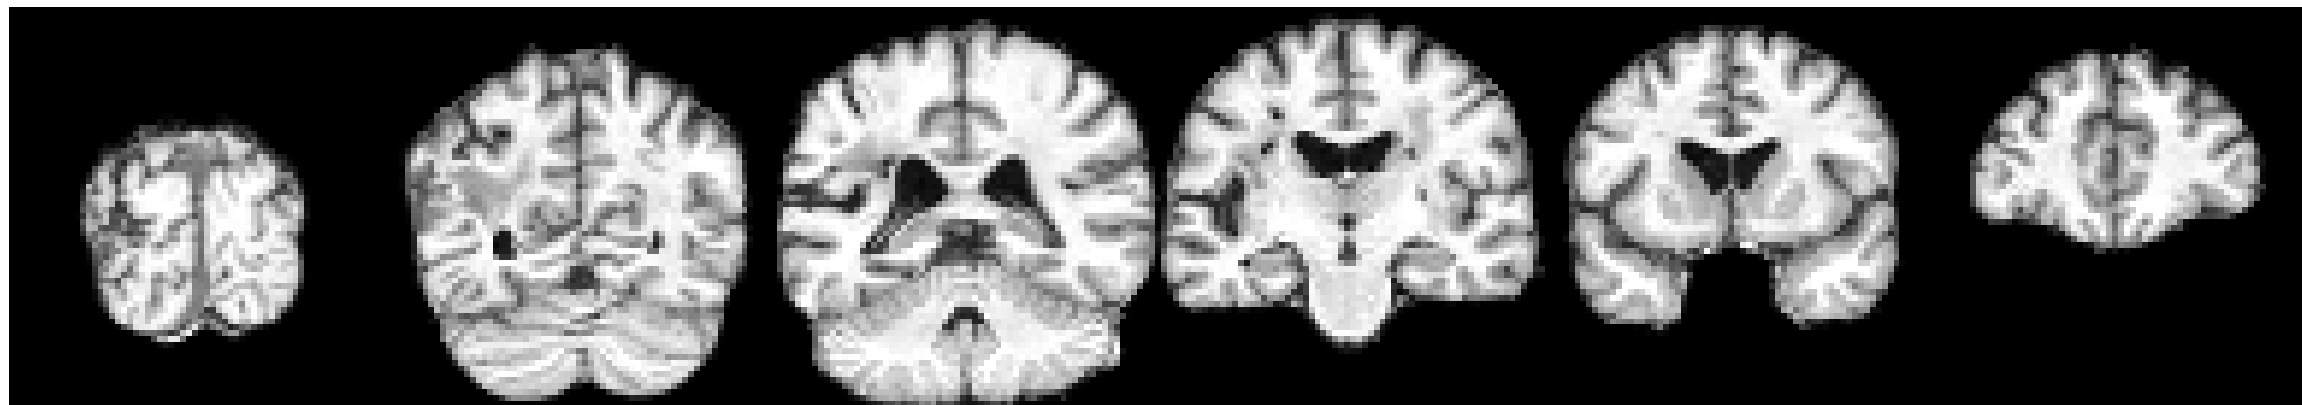

Lesion Overlay

red = Manual Tracing  
blue = LINDA prediction

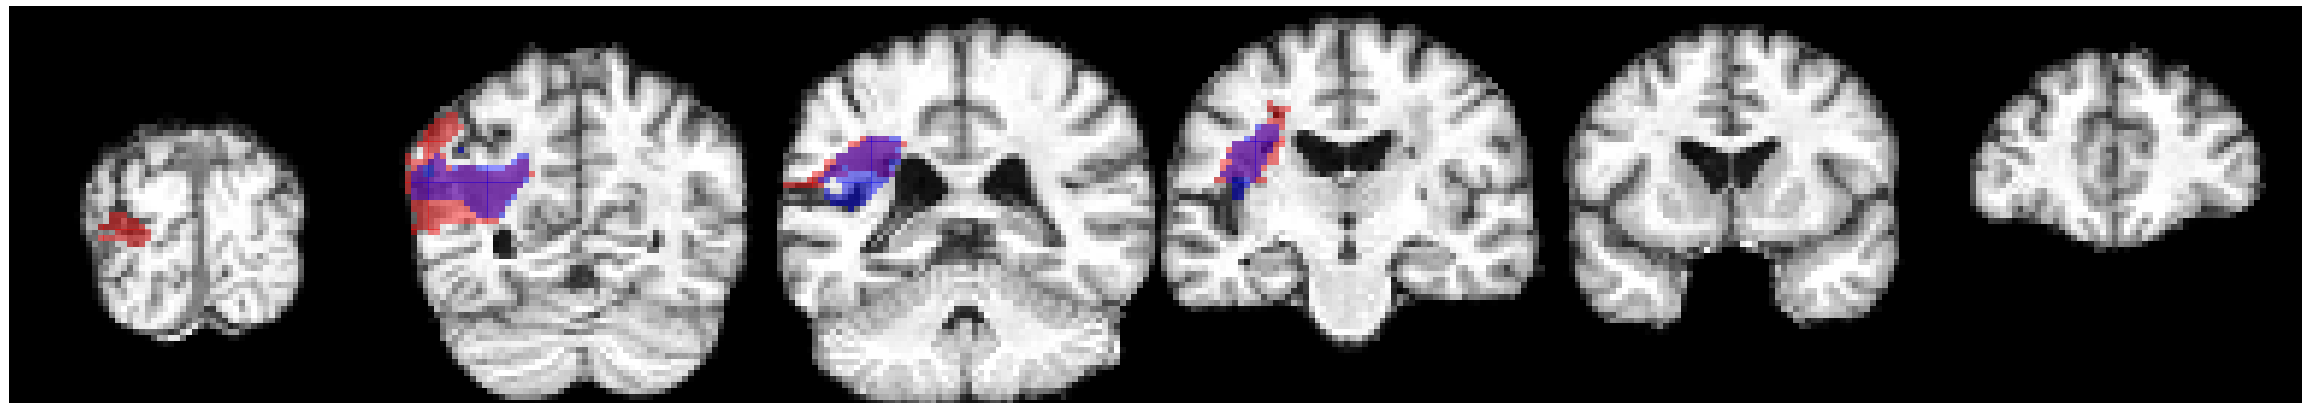



# Subject 57 – XUP0955

|                                          | Value  |
|------------------------------------------|--------|
| Lesion Volume (ml)                       | 28.456 |
| Dice Coefficient                         | 0.729  |
| Jaccard Coefficient                      | 0.573  |
| Hausdorff Distance (mm)                  | 10.198 |
| Average Displacement (mm)                | 2.166  |
| Sensitivity (Recall, true positive rate) | 0.829  |
| Specificity (true negative rate)         | 0.998  |

Normalized T1

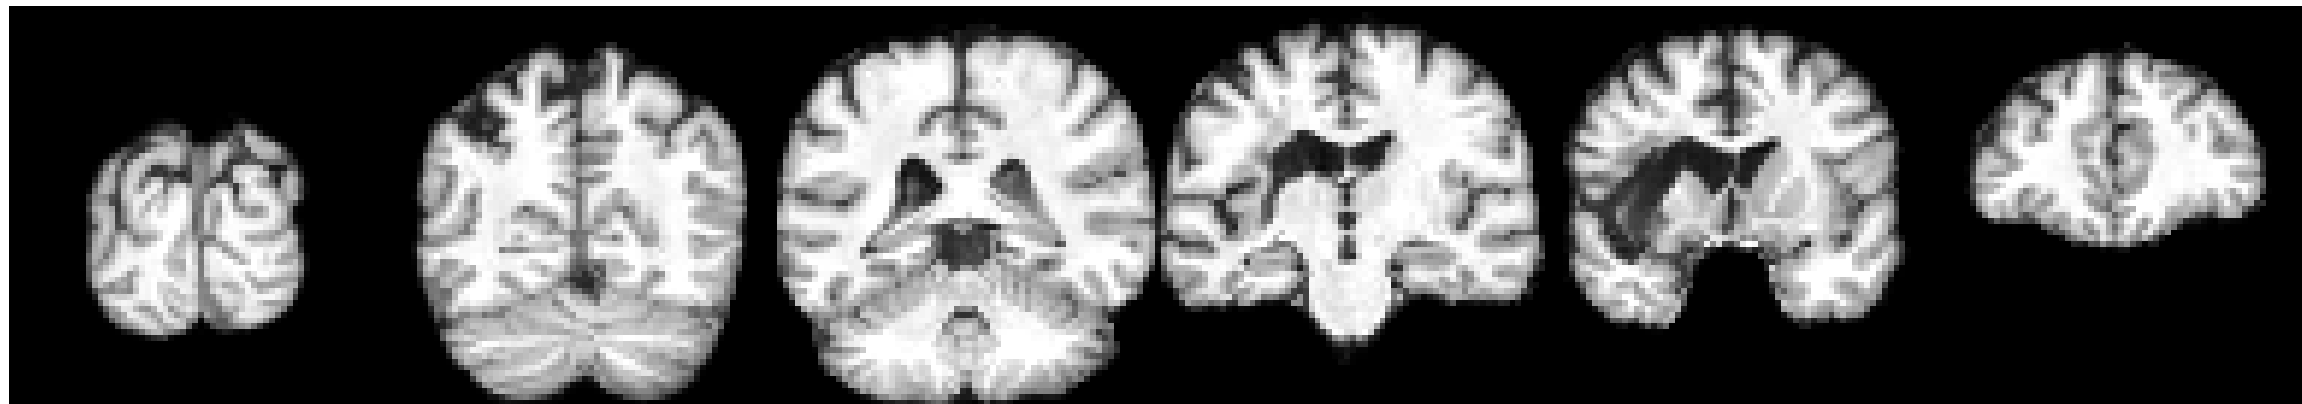

Lesion Overlay

red = Manual Tracing  
blue = LINDA prediction

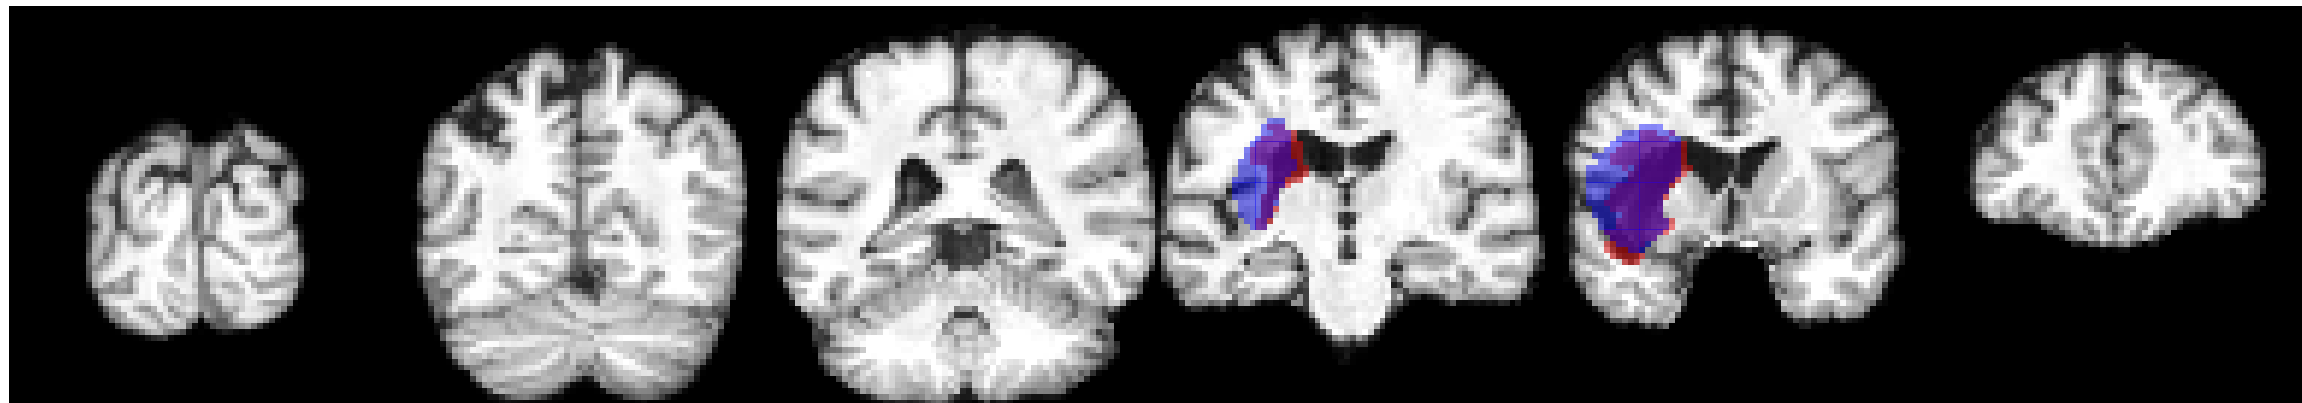

# Subject 58 – XUP1621

|                                          | Value  |
|------------------------------------------|--------|
| Lesion Volume (ml)                       | 24.736 |
| Dice Coefficient                         | 0.774  |
| Jaccard Coefficient                      | 0.631  |
| Hausdorff Distance (mm)                  | 38.105 |
| Average Displacement (mm)                | 2.217  |
| Sensitivity (Recall, true positive rate) | 0.842  |
| Specificity (true negative rate)         | 0.999  |

Normalized T1

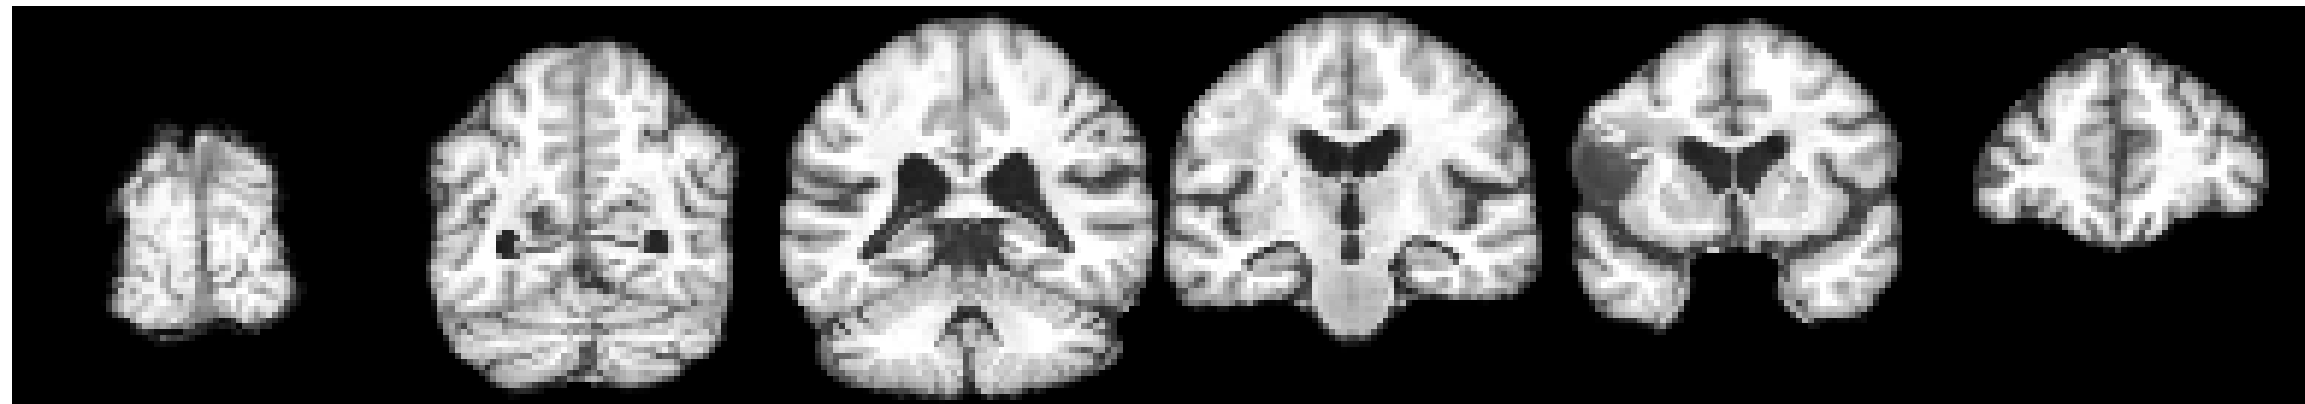

Lesion Overlay

red = Manual Tracing  
blue = LINDA prediction

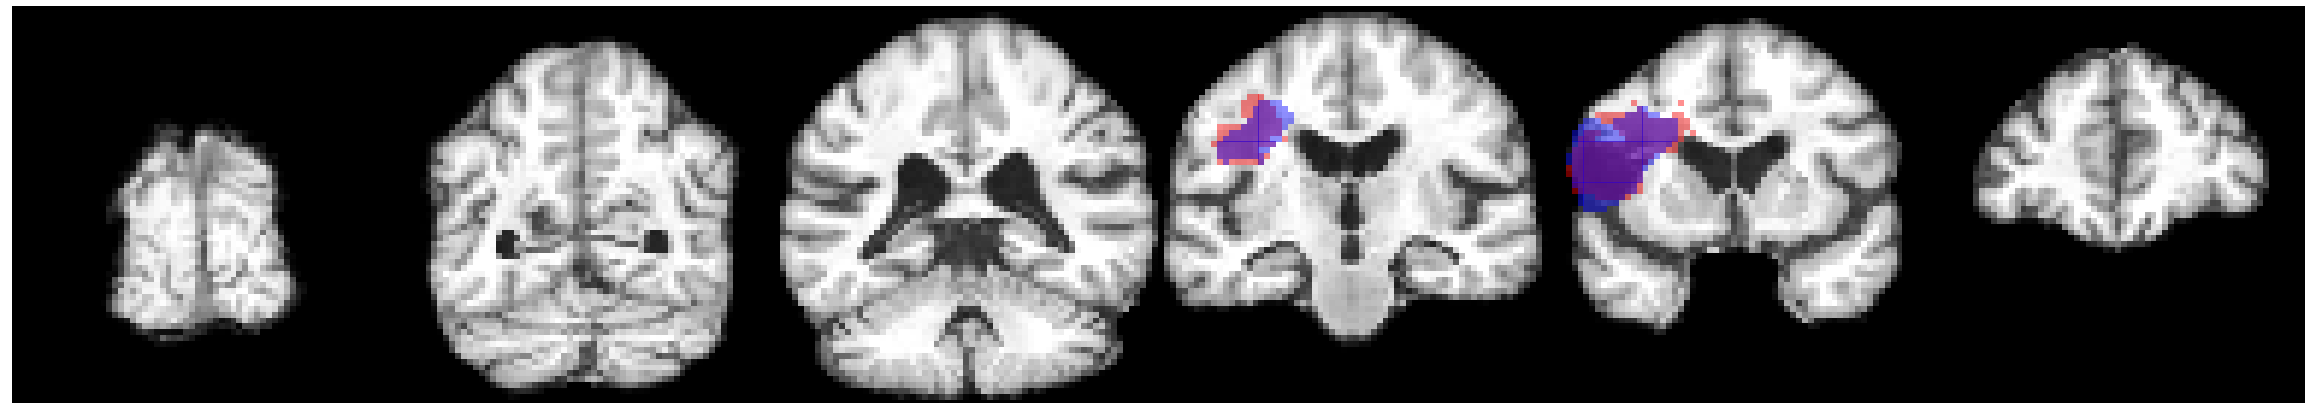

# Subject 59 – XUP7055

|                                          | Value  |
|------------------------------------------|--------|
| Lesion Volume (ml)                       | 25.824 |
| Dice Coefficient                         | 0.693  |
| Jaccard Coefficient                      | 0.53   |
| Hausdorff Distance (mm)                  | 23.749 |
| Average Displacement (mm)                | 2.207  |
| Sensitivity (Recall, true positive rate) | 0.722  |
| Specificity (true negative rate)         | 0.999  |

Normalized T1

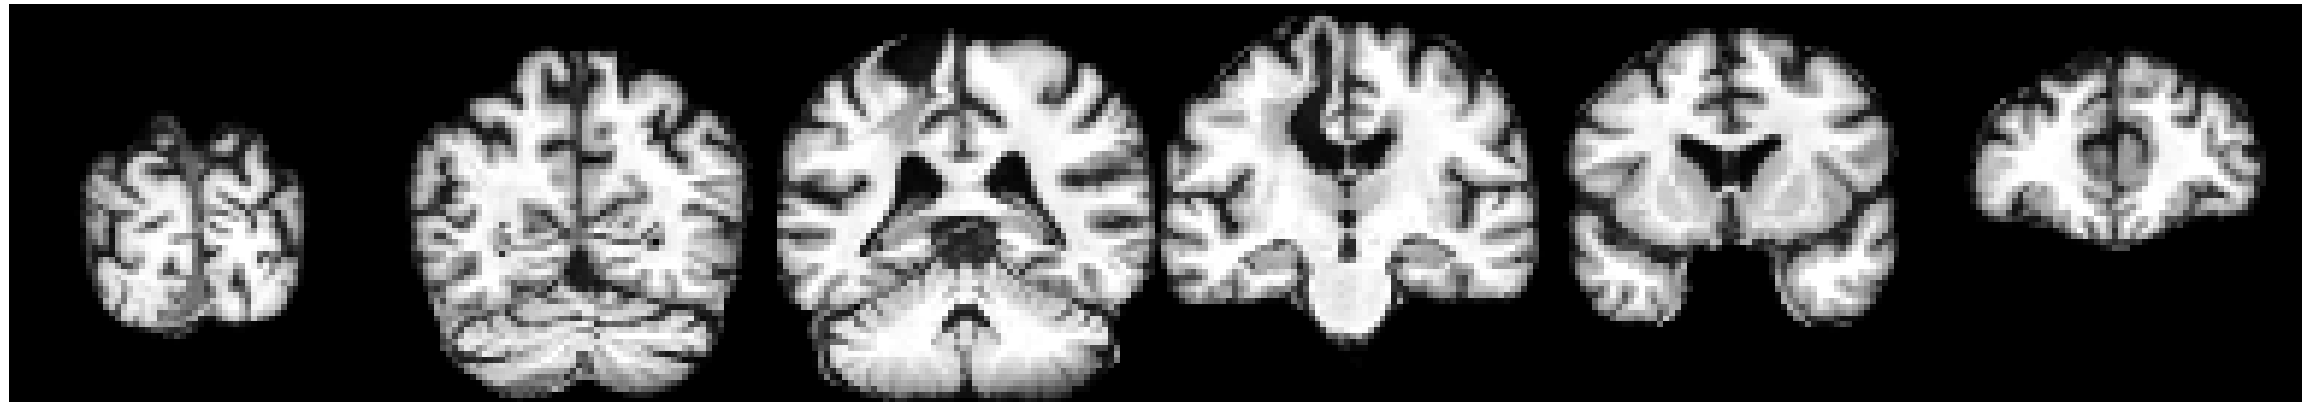

Lesion Overlay

red = Manual Tracing  
blue = LINDA prediction

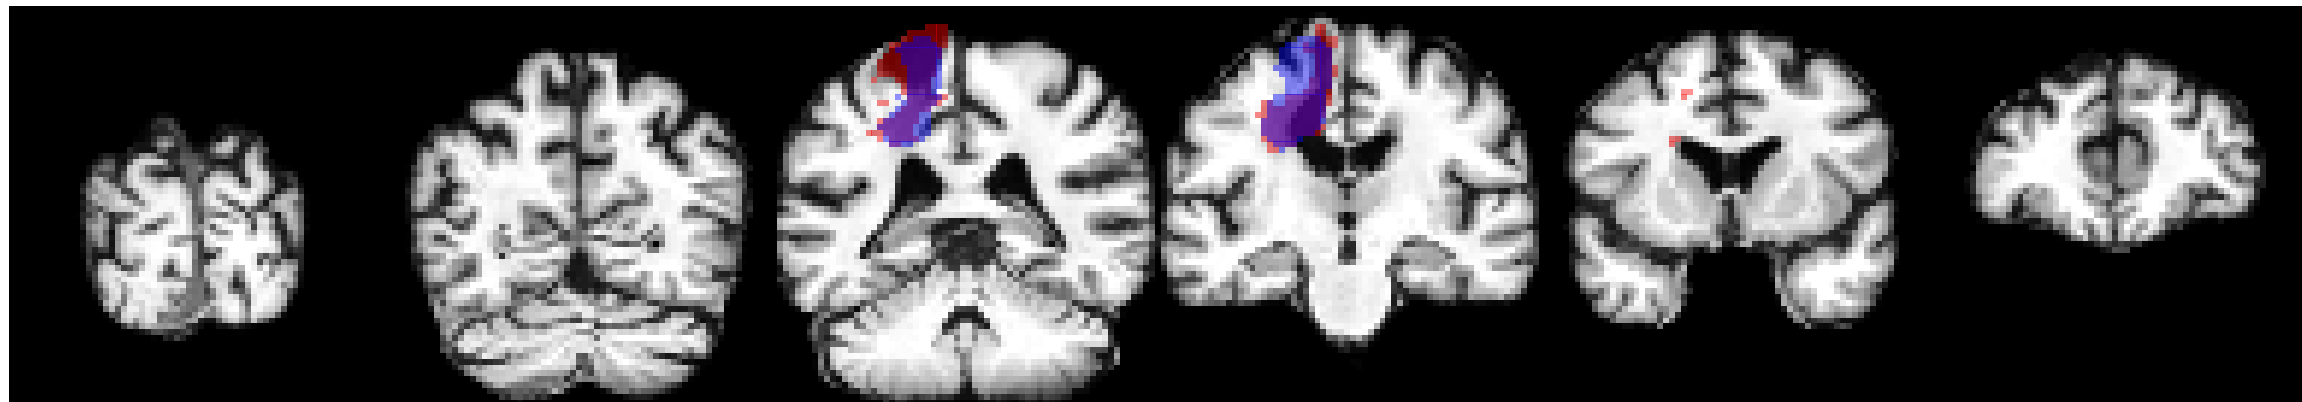

# Subject 60 – XUP9231

|                                          | Value |
|------------------------------------------|-------|
| Lesion Volume (ml)                       | 6.72  |
| Dice Coefficient                         | 0.703 |
| Jaccard Coefficient                      | 0.542 |
| Hausdorff Distance (mm)                  | 9.381 |
| Average Displacement (mm)                | 1.442 |
| Sensitivity (Recall, true positive rate) | 0.795 |
| Specificity (true negative rate)         | 1     |

Normalized T1

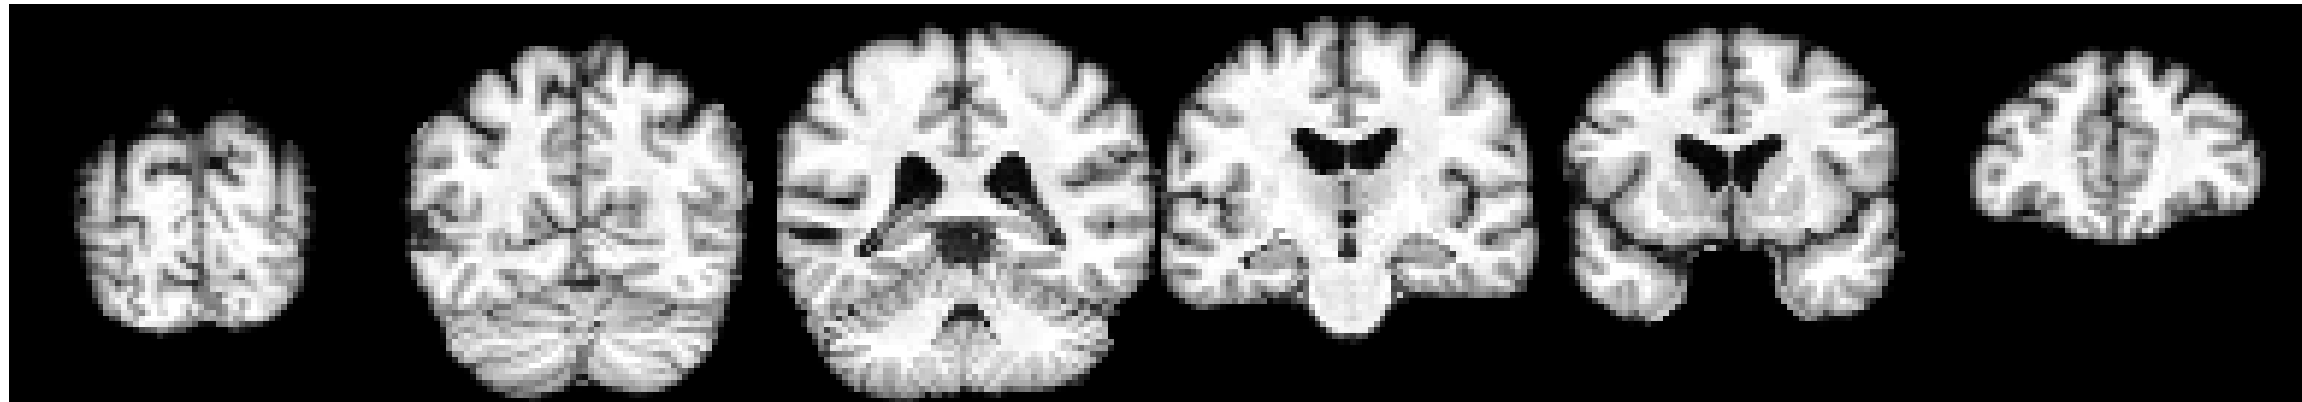

Lesion Overlay

red = Manual Tracing  
blue = LINDA prediction

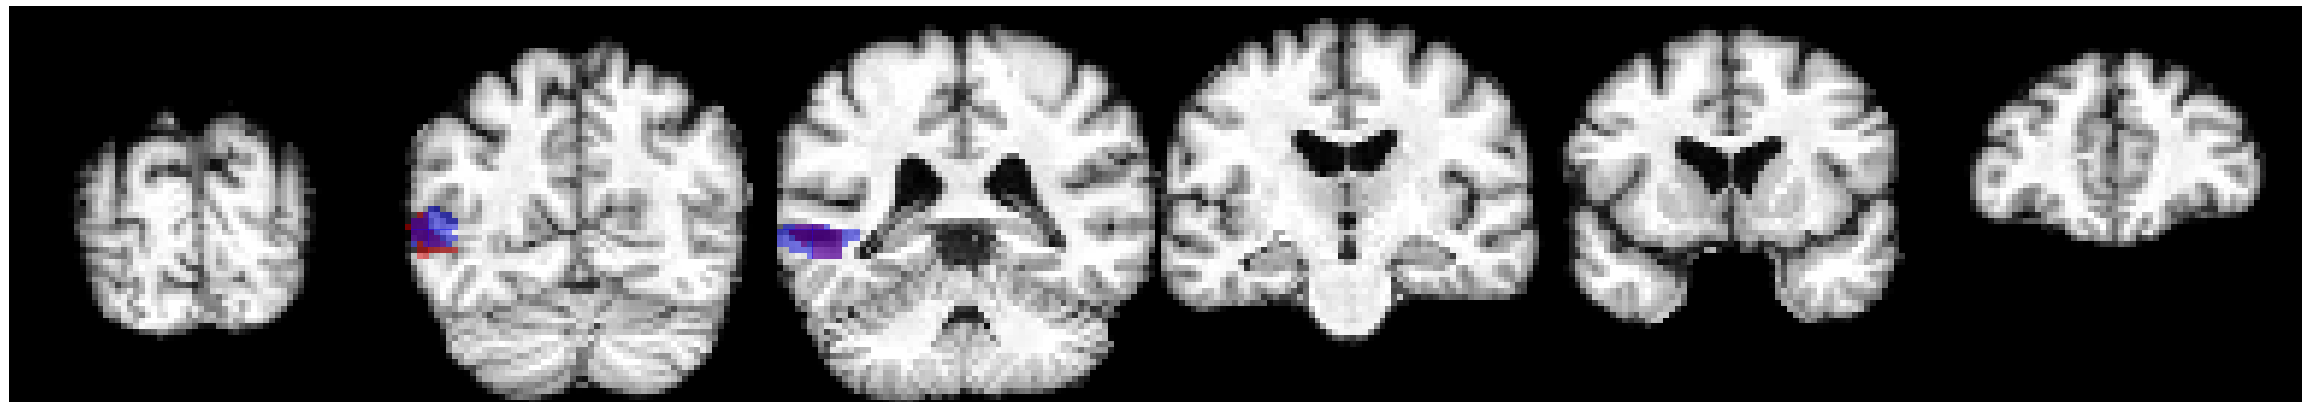

Supplement: HBM-37-1405-s001.pdf [file HBM-37-1405-s001.pdf]
