# Supplementary material
Source: PubMed Central journal article supplement (PMC6867250)

## Subject 1 – AFB

|                                          | Value   |
|------------------------------------------|---------|
| Lesion Volume (ml)                       | 133.144 |
| Dice Coefficient                         | 0.761   |
| Jaccard Coefficient                      | 0.615   |
| Hausdorff Distance (mm)                  | 38.105  |
| Average Displacement (mm)                | 2.175   |
| Sensitivity (Recall, true positive rate) | 0.652   |
| Specificity (true negative rate)         | 0.999   |

Normalized T1

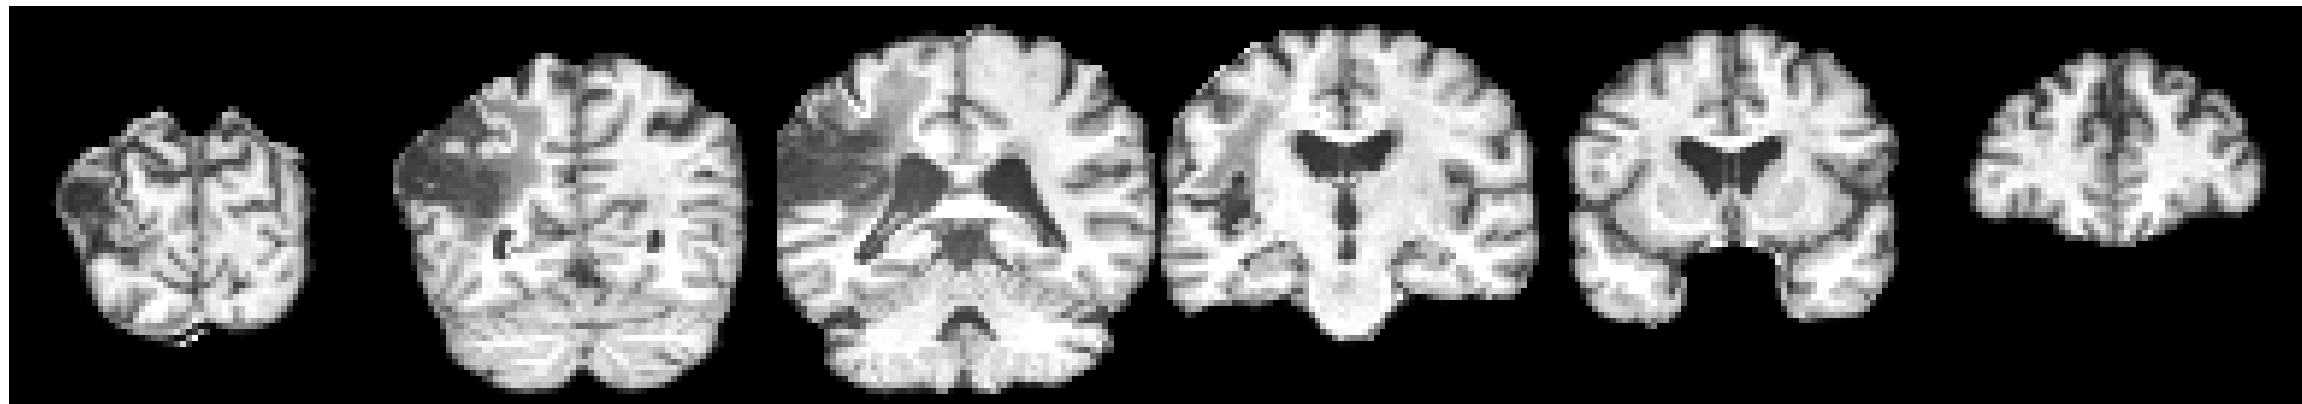

Lesion Overlay

red = Manual Tracing  
blue = LINDA prediction

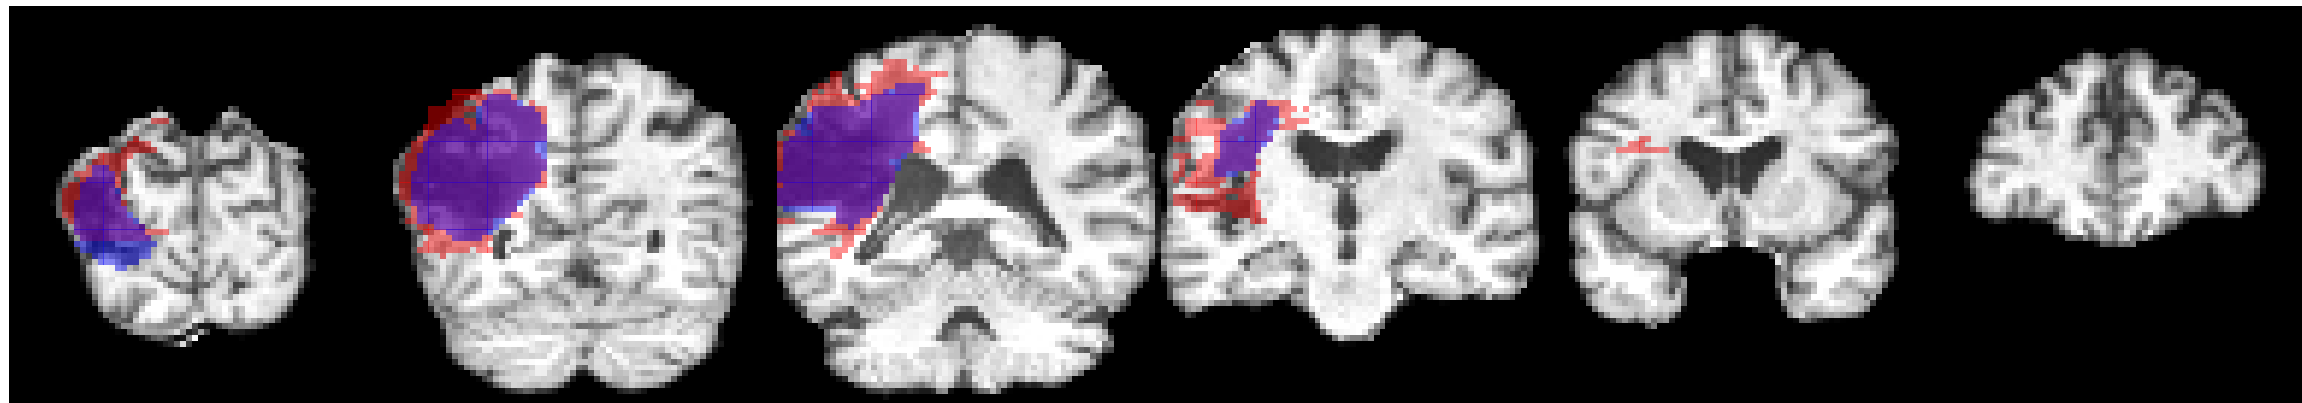

# Subject 2 – AMM

|                                          | Value  |
|------------------------------------------|--------|
| Lesion Volume (ml)                       | 65.944 |
| Dice Coefficient                         | 0.652  |
| Jaccard Coefficient                      | 0.484  |
| Hausdorff Distance (mm)                  | 37.683 |
| Average Displacement (mm)                | 2.011  |
| Sensitivity (Recall, true positive rate) | 0.5    |
| Specificity (true negative rate)         | 1      |

Normalized T1

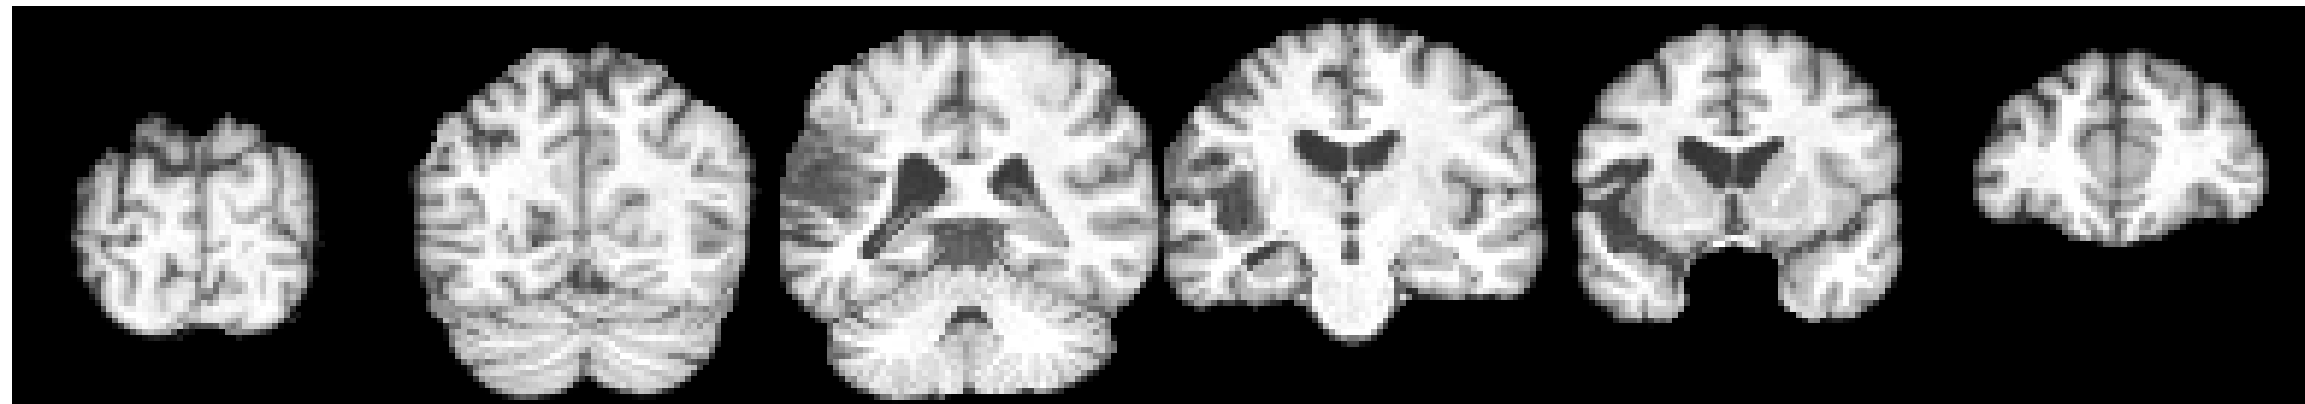

Lesion Overlay

red = Manual Tracing  
blue = LINDA prediction

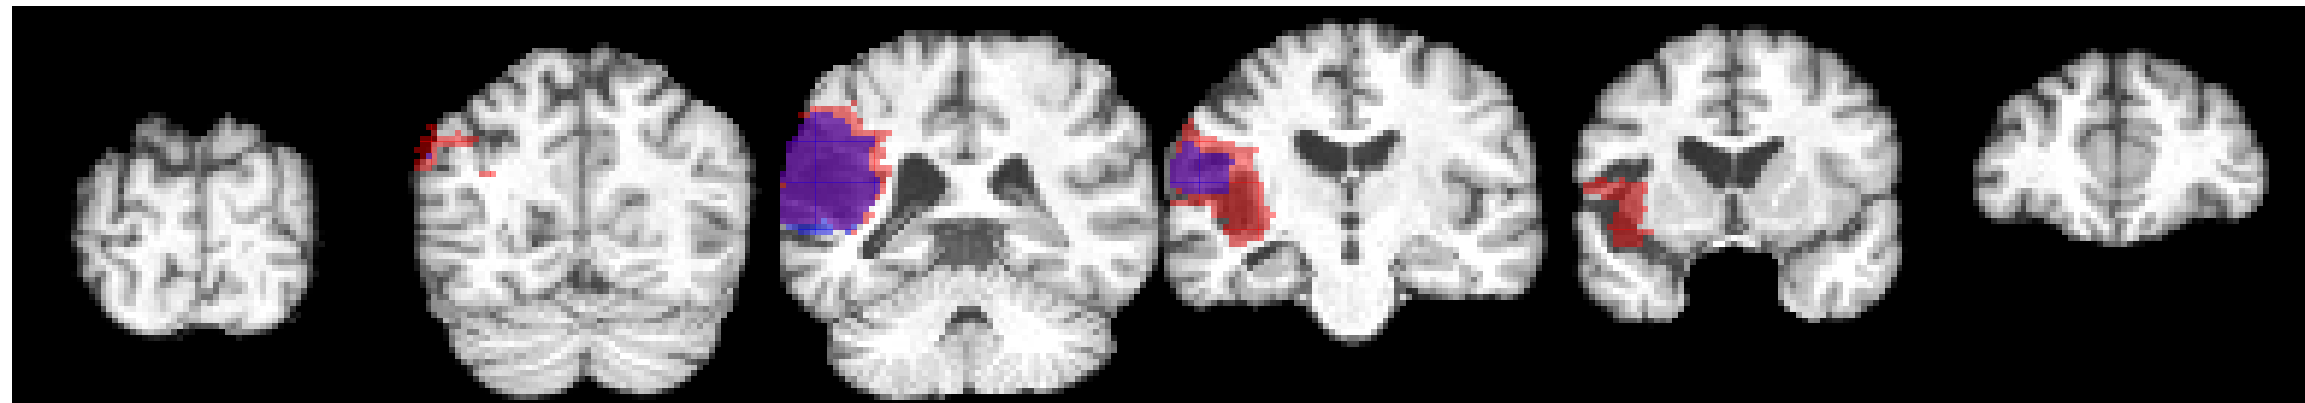

## Subject 3 – APJ

|                                          | Value  |
|------------------------------------------|--------|
| Lesion Volume (ml)                       | 68.528 |
| Dice Coefficient                         | 0.599  |
| Jaccard Coefficient                      | 0.427  |
| Hausdorff Distance (mm)                  | 35.496 |
| Average Displacement (mm)                | 2.221  |
| Sensitivity (Recall, true positive rate) | 0.475  |
| Specificity (true negative rate)         | 0.999  |

Normalized T1

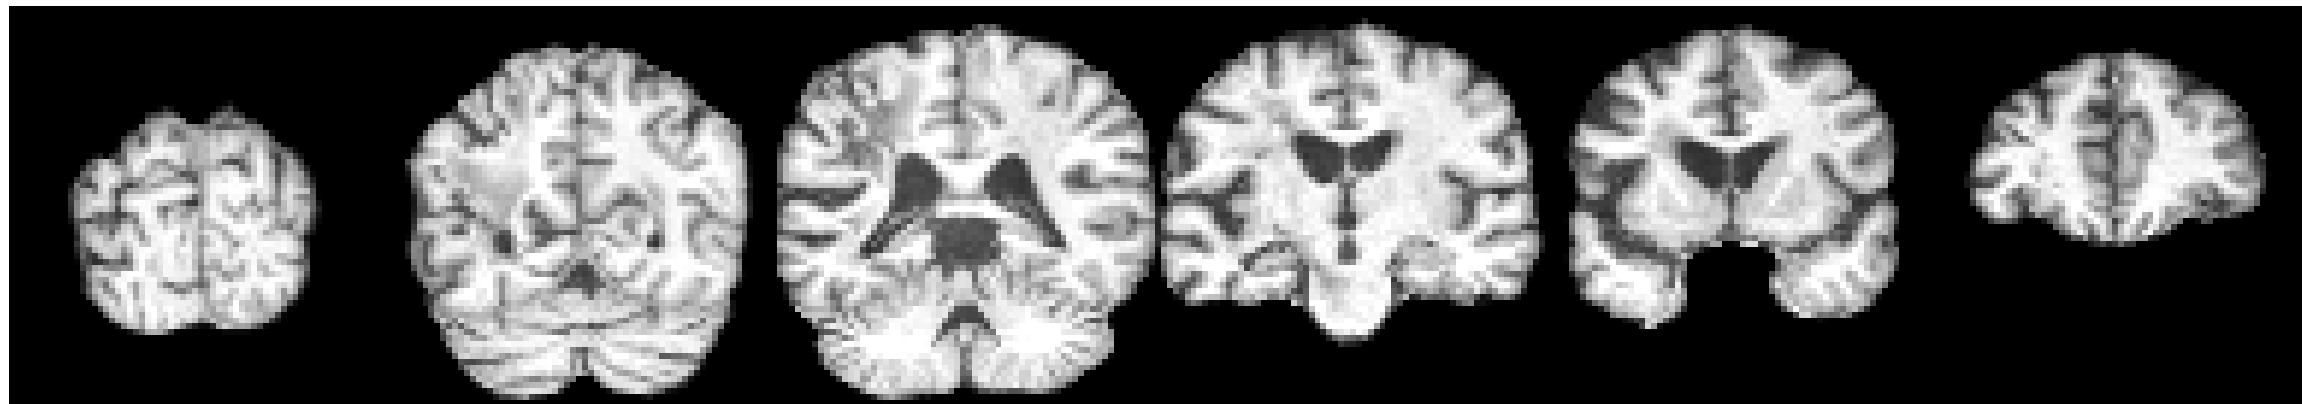

Lesion Overlay

red = Manual Tracing  
blue = LINDA prediction

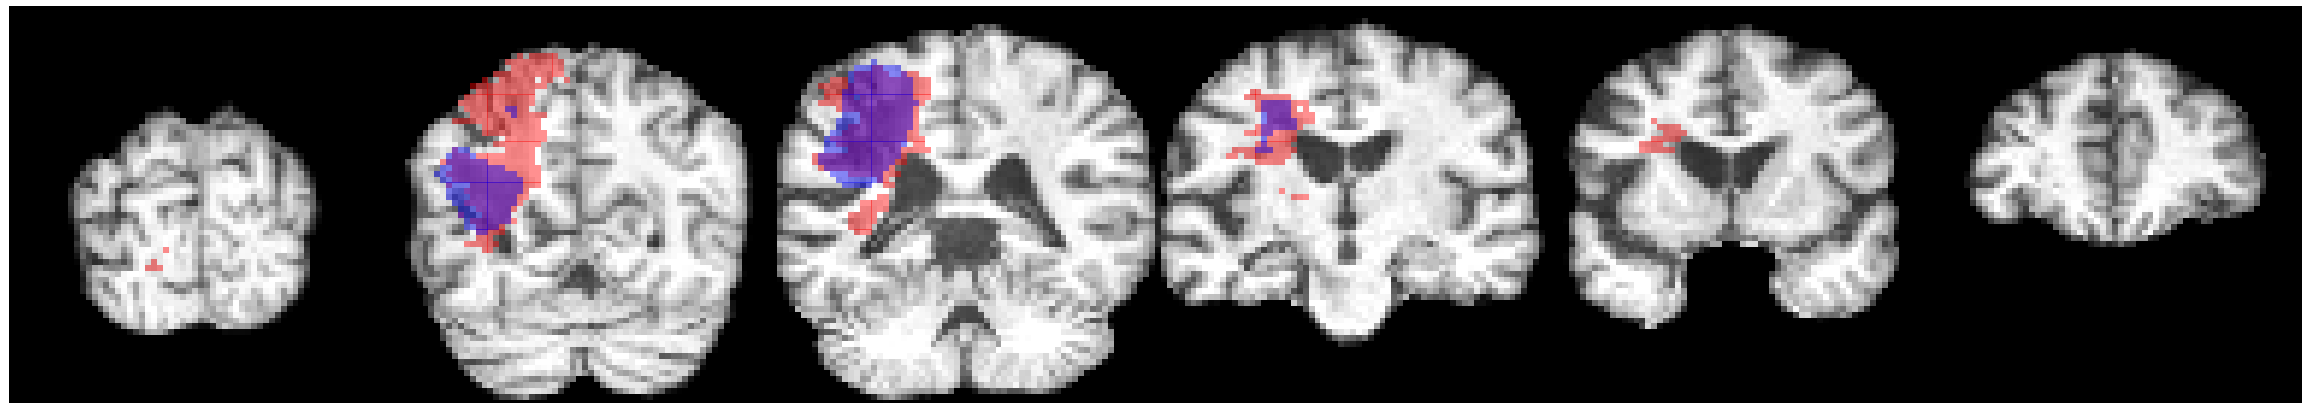

## Subject 4 – BIC

|                                          | Value   |
|------------------------------------------|---------|
| Lesion Volume (ml)                       | 153.128 |
| Dice Coefficient                         | 0.66    |
| Jaccard Coefficient                      | 0.493   |
| Hausdorff Distance (mm)                  | 49.558  |
| Average Displacement (mm)                | 1.813   |
| Sensitivity (Recall, true positive rate) | 0.509   |
| Specificity (true negative rate)         | 0.999   |

Normalized T1

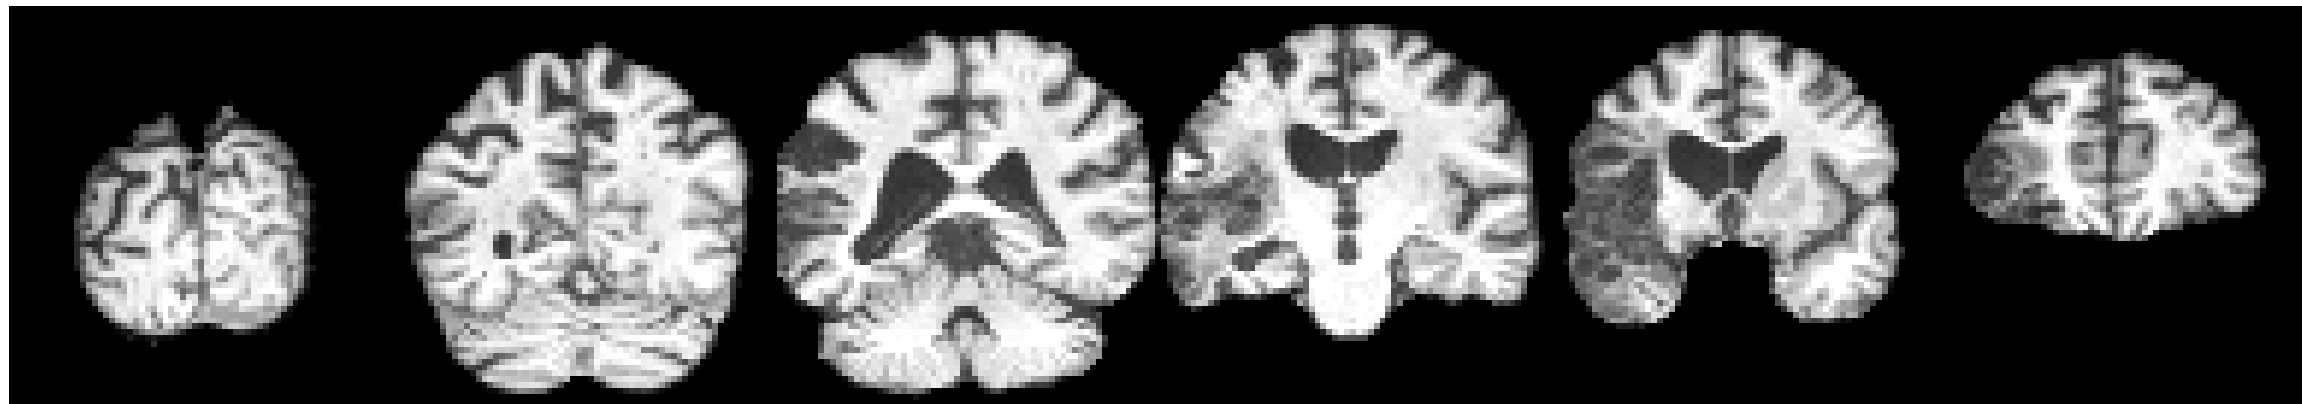

Lesion Overlay

red = Manual Tracing  
blue = LINDA prediction

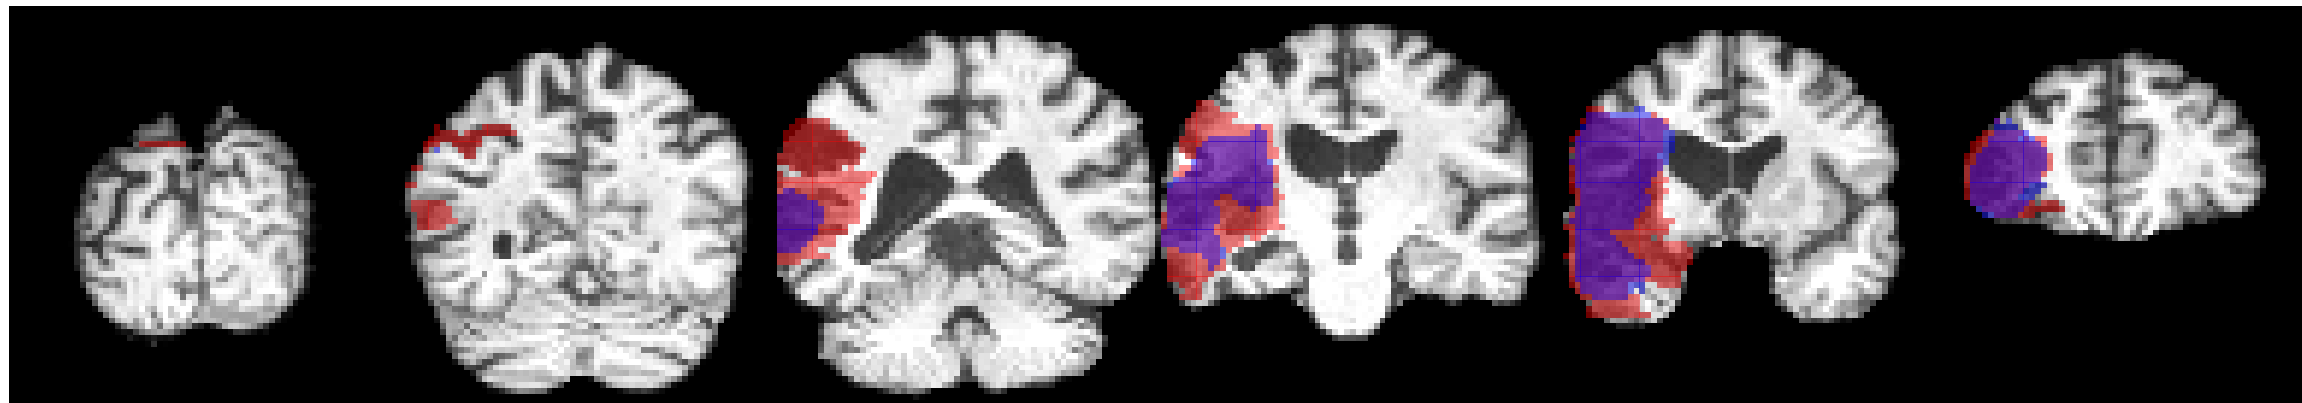

## Subject 5 – BST

|                                          | Value  |
|------------------------------------------|--------|
| Lesion Volume (ml)                       | 11.184 |
| Dice Coefficient                         | 0      |
| Jaccard Coefficient                      | 0      |
| Hausdorff Distance (mm)                  | 0      |
| Average Displacement (mm)                | 0      |
| Sensitivity (Recall, true positive rate) | 0      |
| Specificity (true negative rate)         | 0      |

Normalized T1

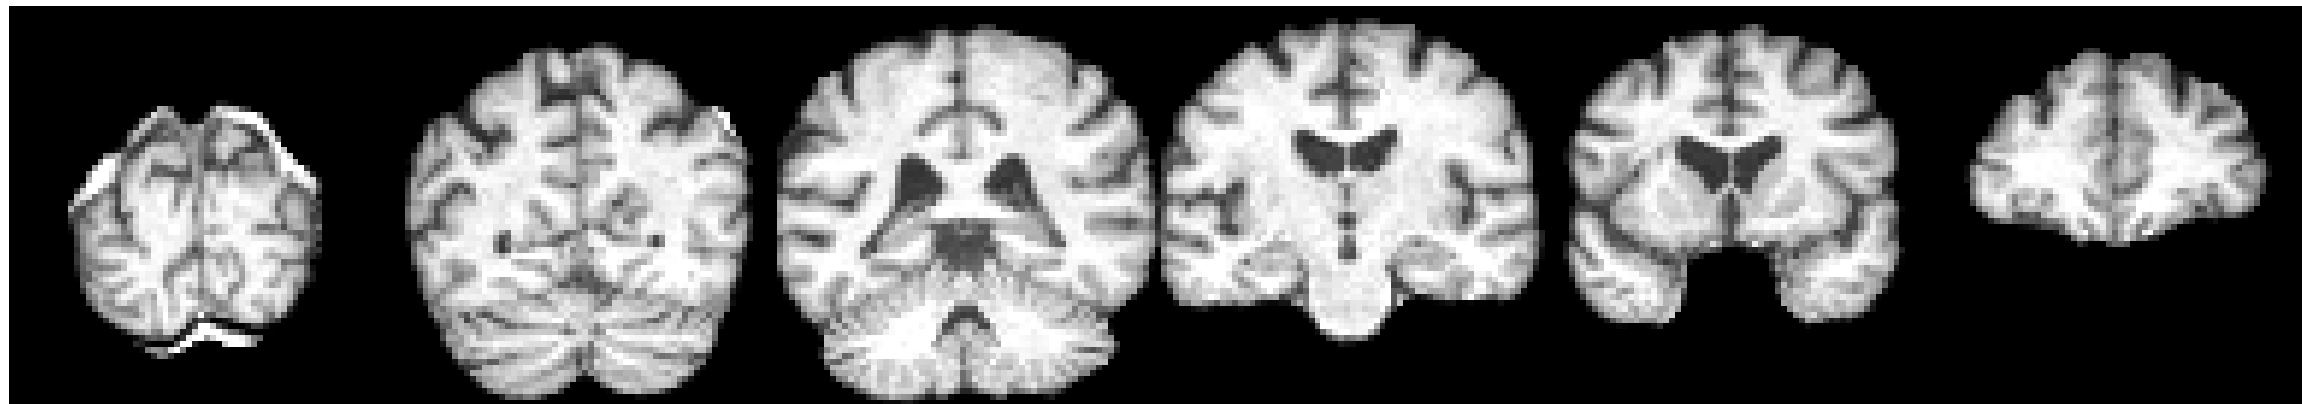

Lesion Overlay

red = Manual Tracing  
blue = LINDA prediction

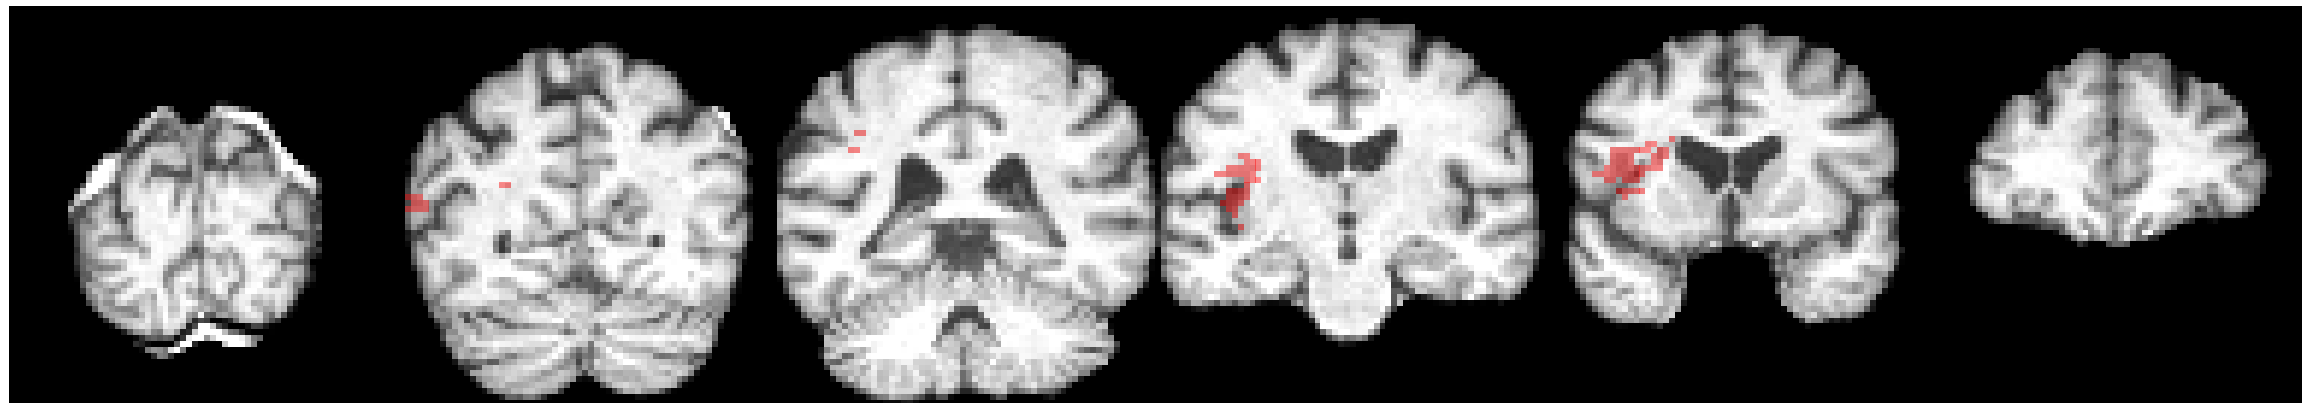

# Subject 6 – CCS

|                                          | Value  |
|------------------------------------------|--------|
| Lesion Volume (ml)                       | 73.824 |
| Dice Coefficient                         | 0.727  |
| Jaccard Coefficient                      | 0.571  |
| Hausdorff Distance (mm)                  | 18.547 |
| Average Displacement (mm)                | 1.816  |
| Sensitivity (Recall, true positive rate) | 0.662  |
| Specificity (true negative rate)         | 0.999  |

Normalized T1

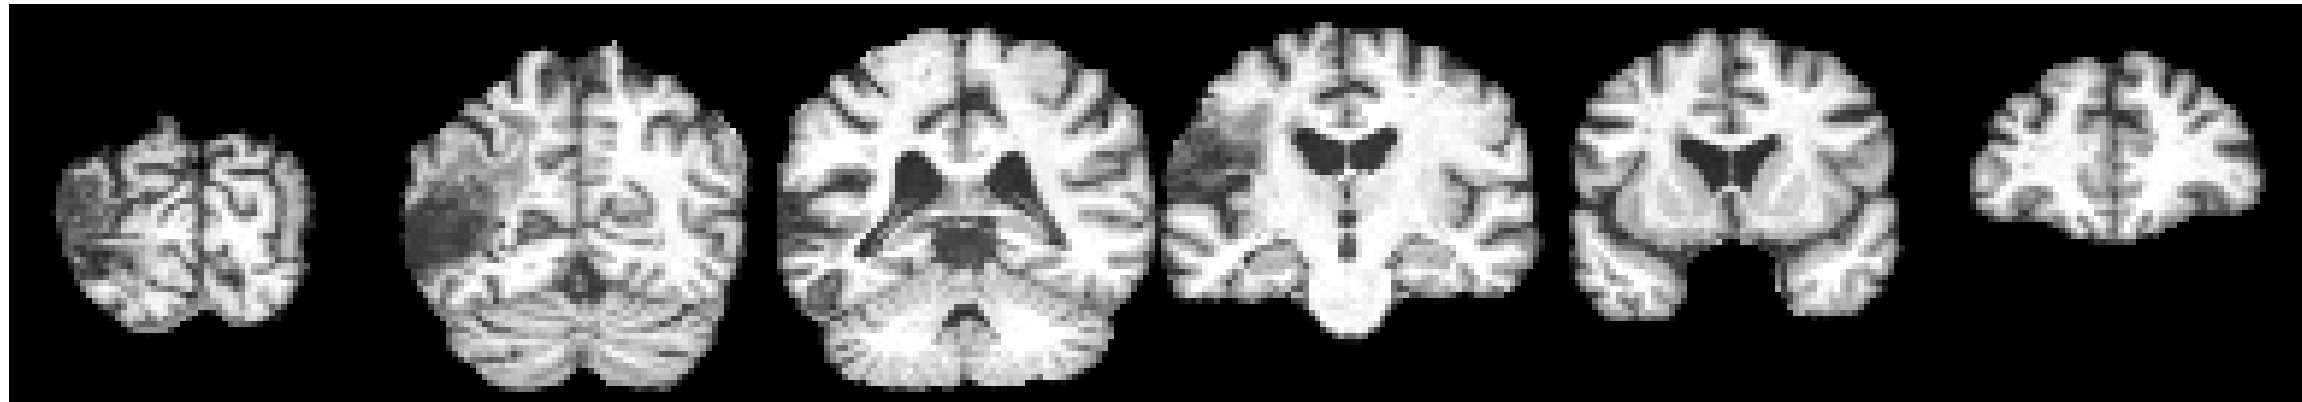

Lesion Overlay

red = Manual Tracing  
blue = LINDA prediction

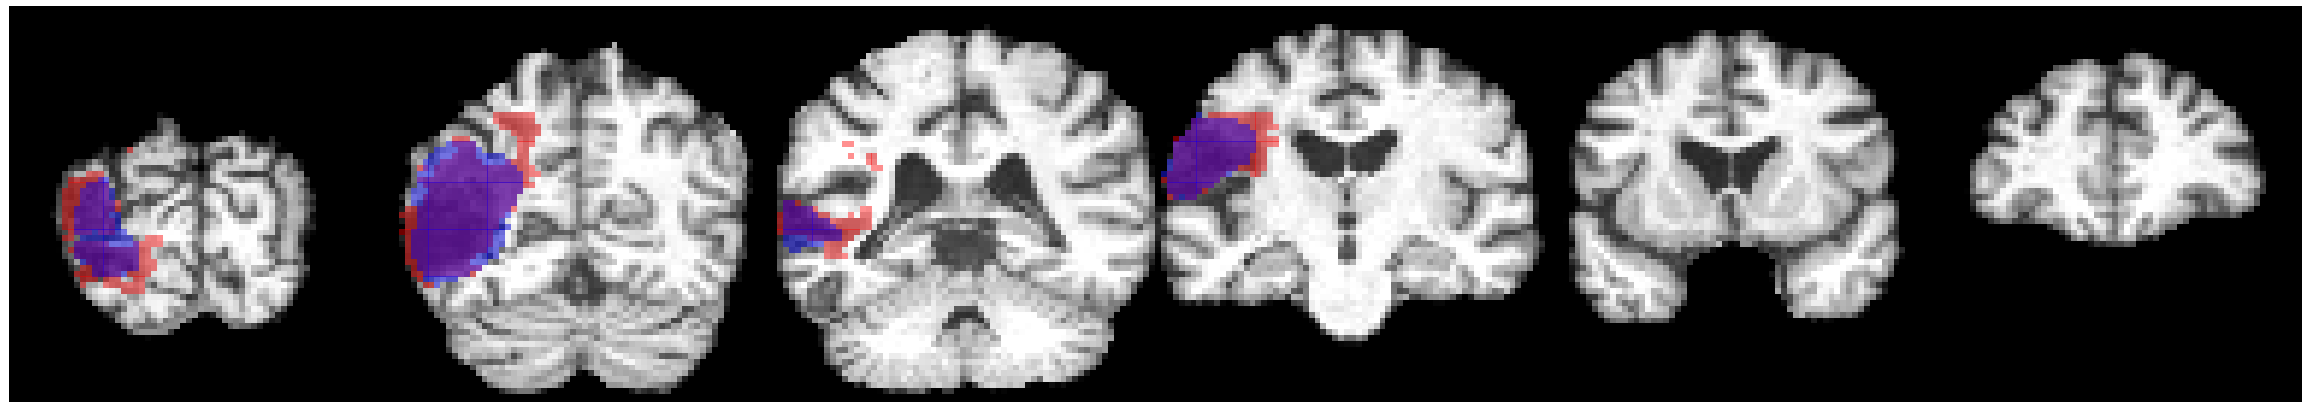

## Subject 7 – CYM

|                                          | Value  |
|------------------------------------------|--------|
| Lesion Volume (ml)                       | 2.616  |
| Dice Coefficient                         | 0.098  |
| Jaccard Coefficient                      | 0.051  |
| Hausdorff Distance (mm)                  | 47.707 |
| Average Displacement (mm)                | 1.455  |
| Sensitivity (Recall, true positive rate) | 0.214  |
| Specificity (true negative rate)         | 0.999  |

Normalized T1

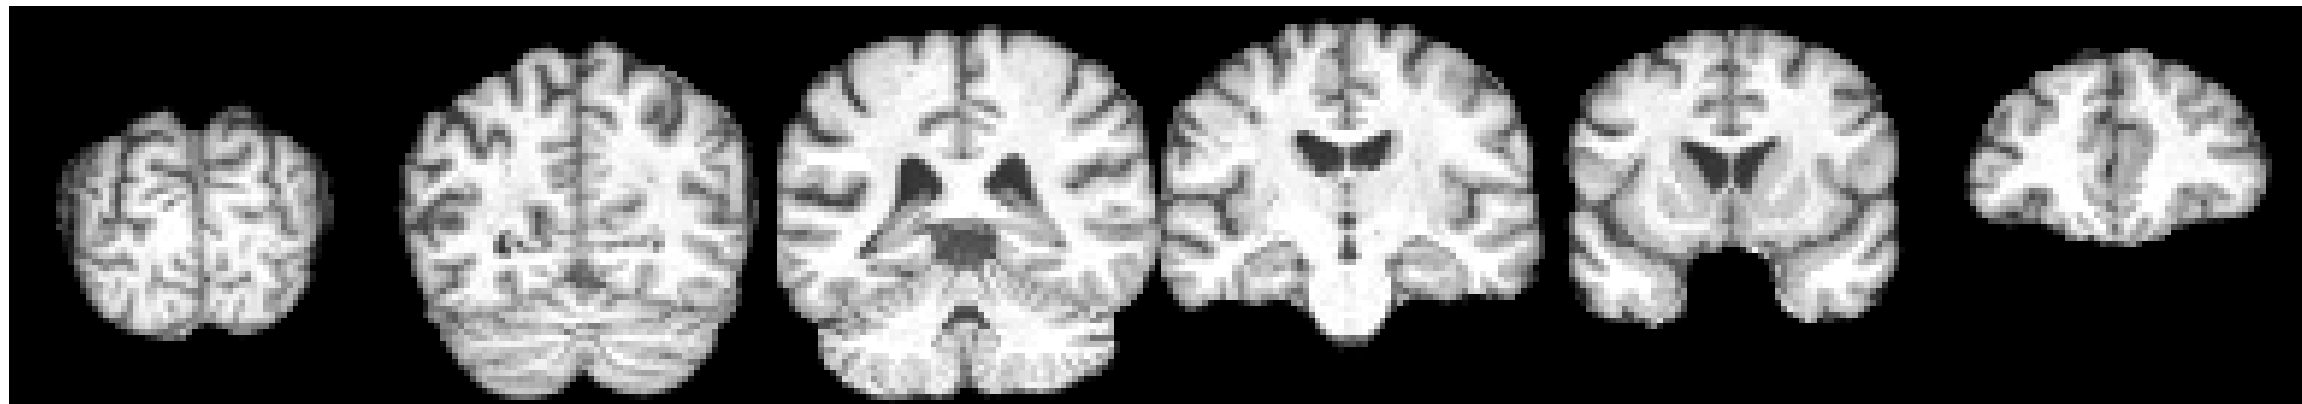

Lesion Overlay

red = Manual Tracing  
blue = LINDA prediction

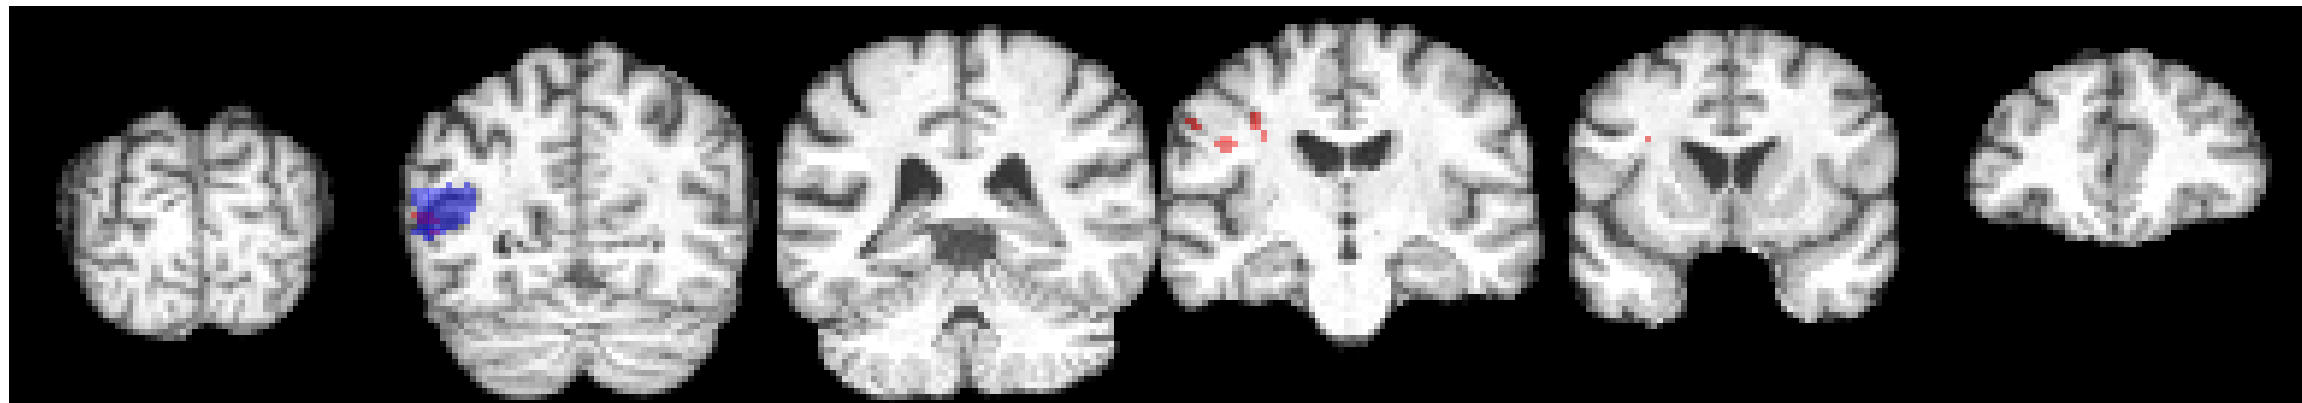

## Subject 8 – DSA

|                                          | Value  |
|------------------------------------------|--------|
| Lesion Volume (ml)                       | 77.616 |
| Dice Coefficient                         | 0.781  |
| Jaccard Coefficient                      | 0.641  |
| Hausdorff Distance (mm)                  | 16.613 |
| Average Displacement (mm)                | 2.62   |
| Sensitivity (Recall, true positive rate) | 0.741  |
| Specificity (true negative rate)         | 0.998  |

Normalized T1

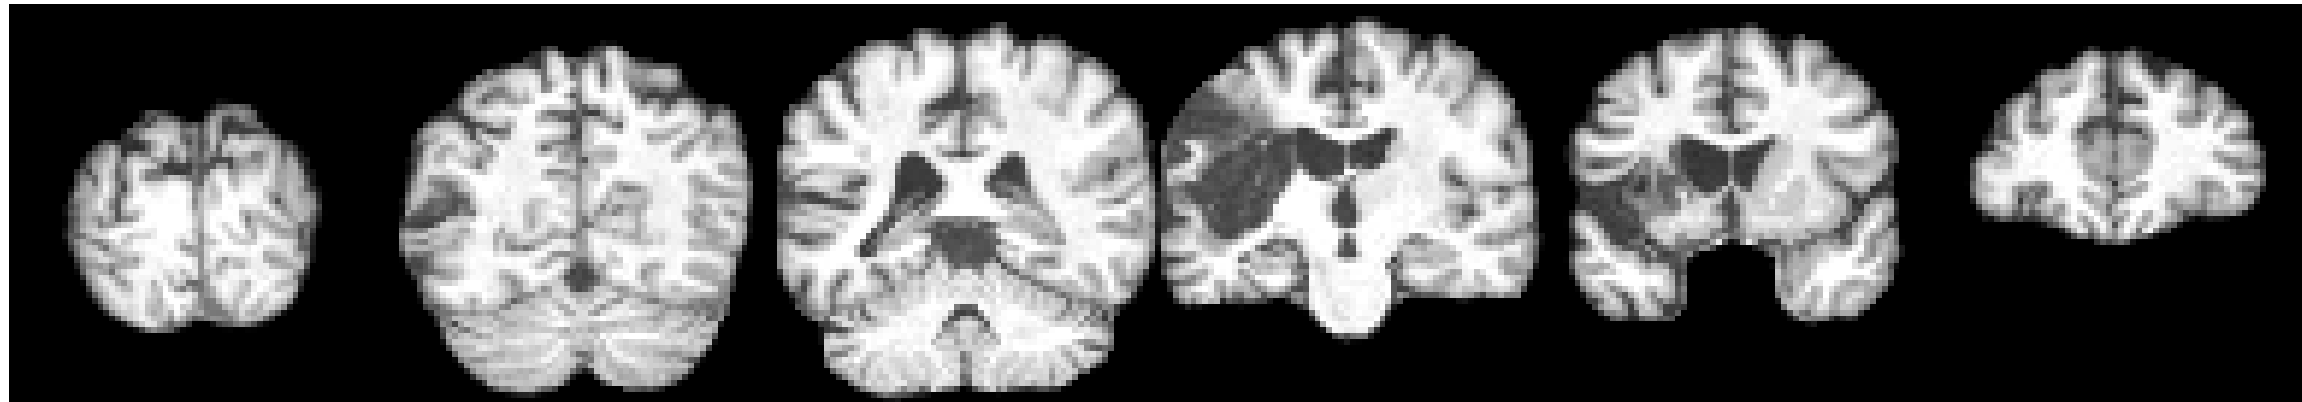

Lesion Overlay

red = Manual Tracing  
blue = LINDA prediction

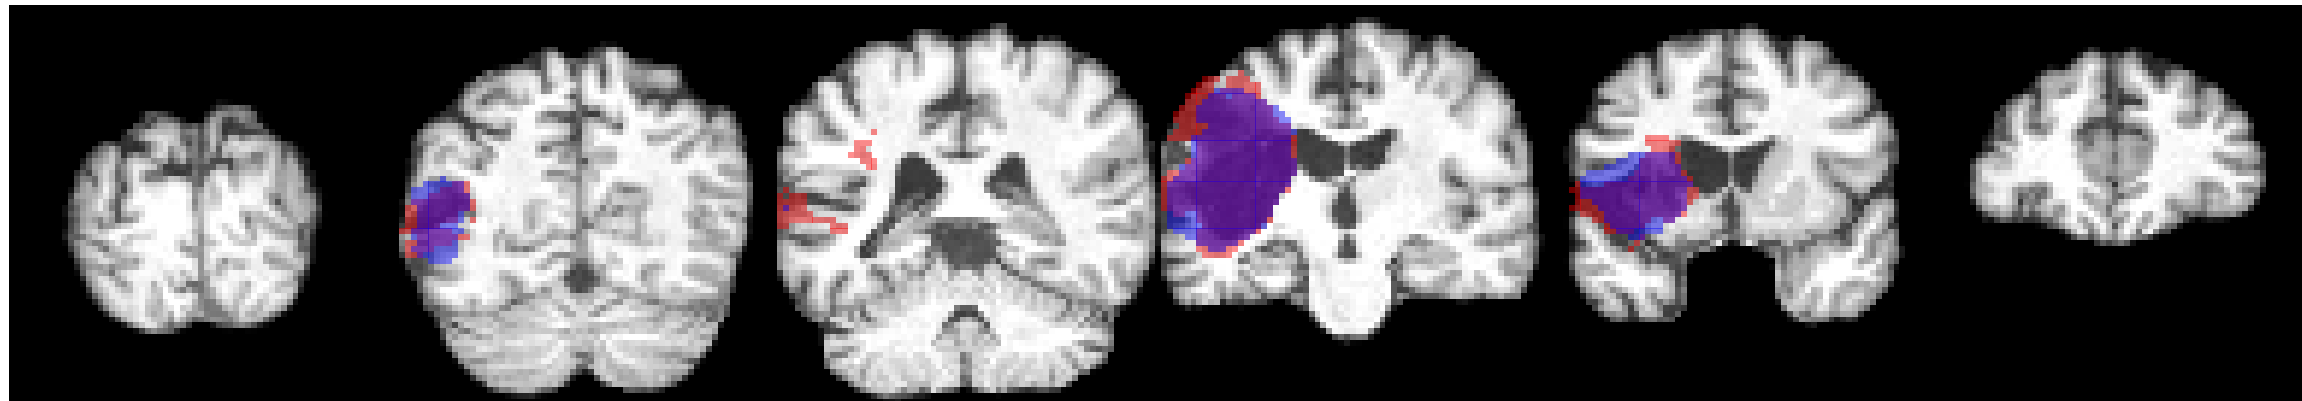



# Subject 9 – EDS

|                                          | Value   |
|------------------------------------------|---------|
| Lesion Volume (ml)                       | 312.184 |
| Dice Coefficient                         | 0.804   |
| Jaccard Coefficient                      | 0.672   |
| Hausdorff Distance (mm)                  | 25.377  |
| Average Displacement (mm)                | 2.213   |
| Sensitivity (Recall, true positive rate) | 0.7     |
| Specificity (true negative rate)         | 0.998   |

Normalized T1

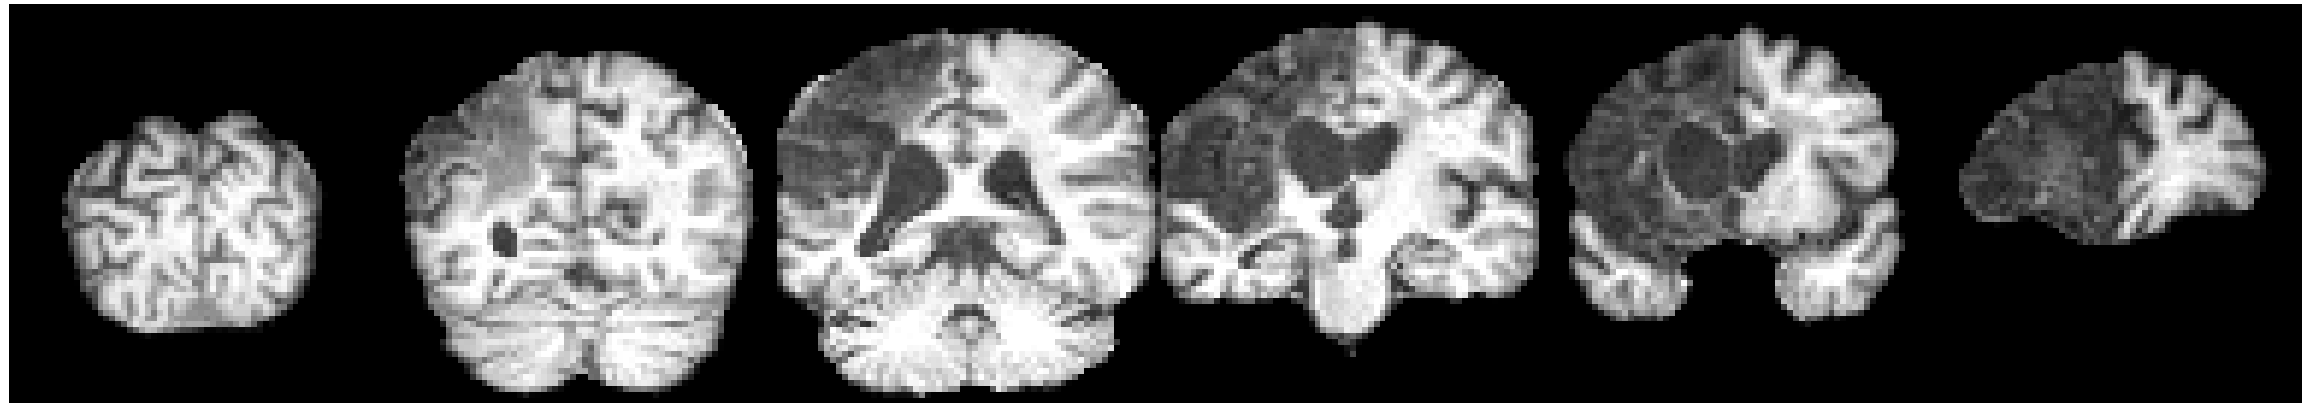

Lesion Overlay

red = Manual Tracing  
blue = LINDA prediction

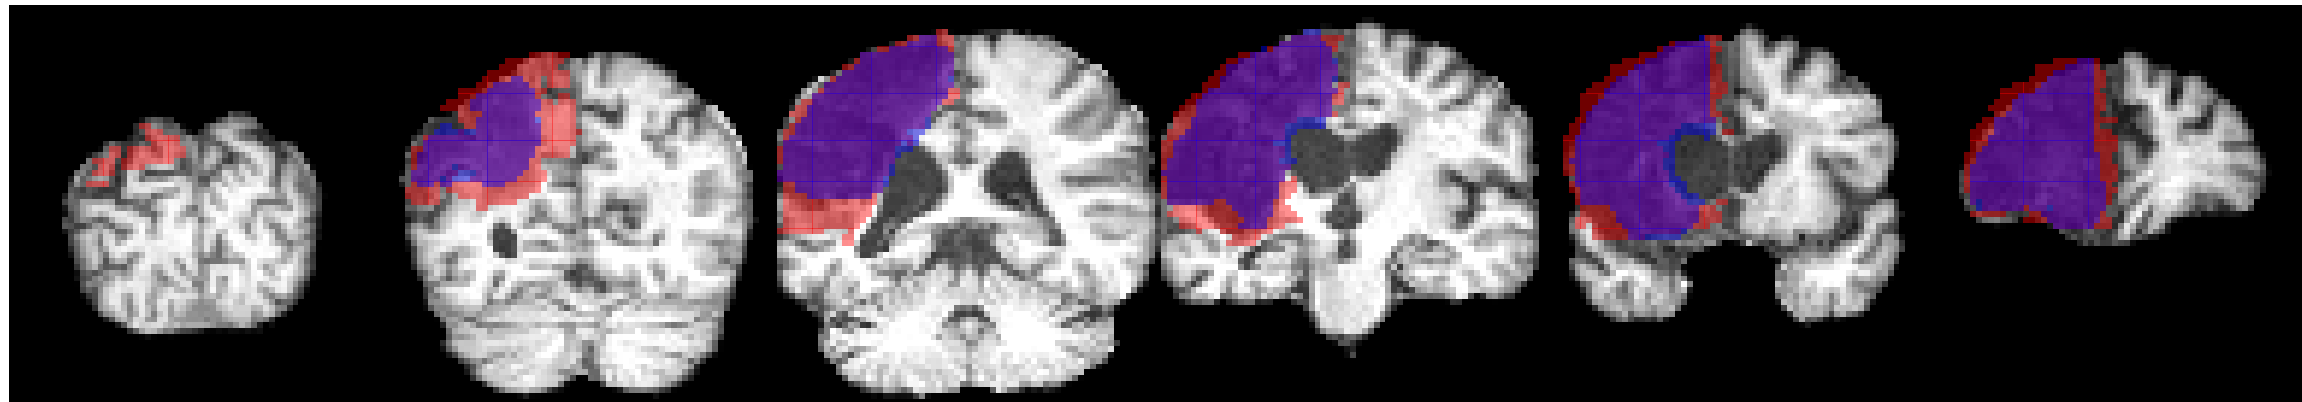

# Subject 10 – EFT

|                                          | Value  |
|------------------------------------------|--------|
| Lesion Volume (ml)                       | 43.232 |
| Dice Coefficient                         | 0.681  |
| Jaccard Coefficient                      | 0.516  |
| Hausdorff Distance (mm)                  | 21.541 |
| Average Displacement (mm)                | 1.601  |
| Sensitivity (Recall, true positive rate) | 0.853  |
| Specificity (true negative rate)         | 0.996  |

Normalized T1

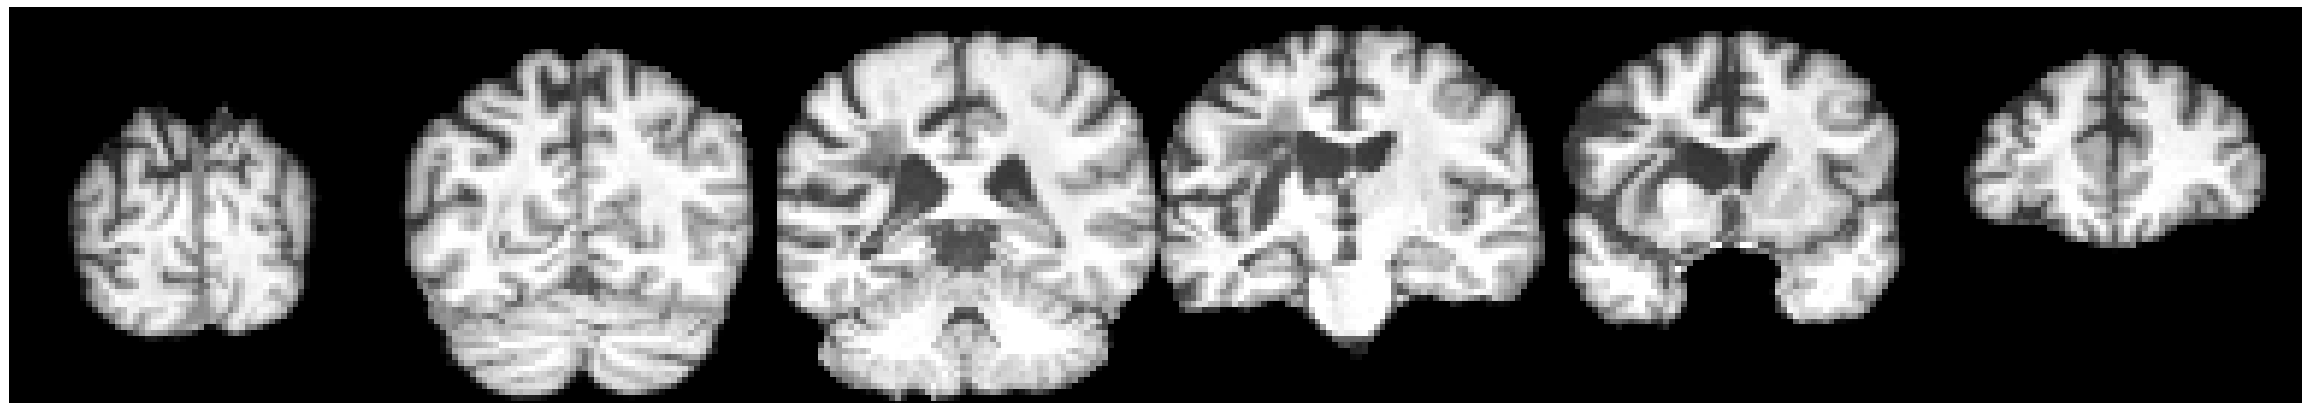

Lesion Overlay

red = Manual Tracing  
blue = LINDA prediction

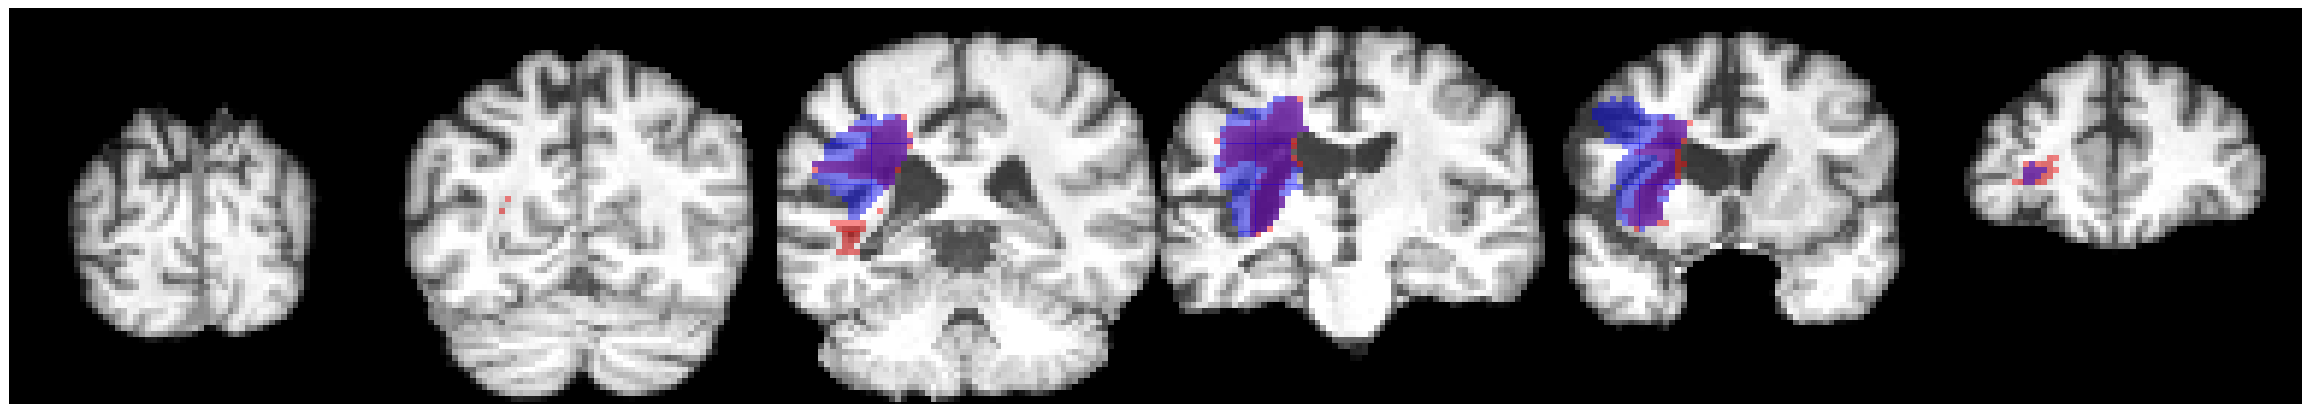

# Subject 11 – EYU

|                                          | Value  |
|------------------------------------------|--------|
| Lesion Volume (ml)                       | 124.24 |
| Dice Coefficient                         | 0.81   |
| Jaccard Coefficient                      | 0.681  |
| Hausdorff Distance (mm)                  | 14.422 |
| Average Displacement (mm)                | 3.597  |
| Sensitivity (Recall, true positive rate) | 0.774  |
| Specificity (true negative rate)         | 0.998  |

Normalized T1

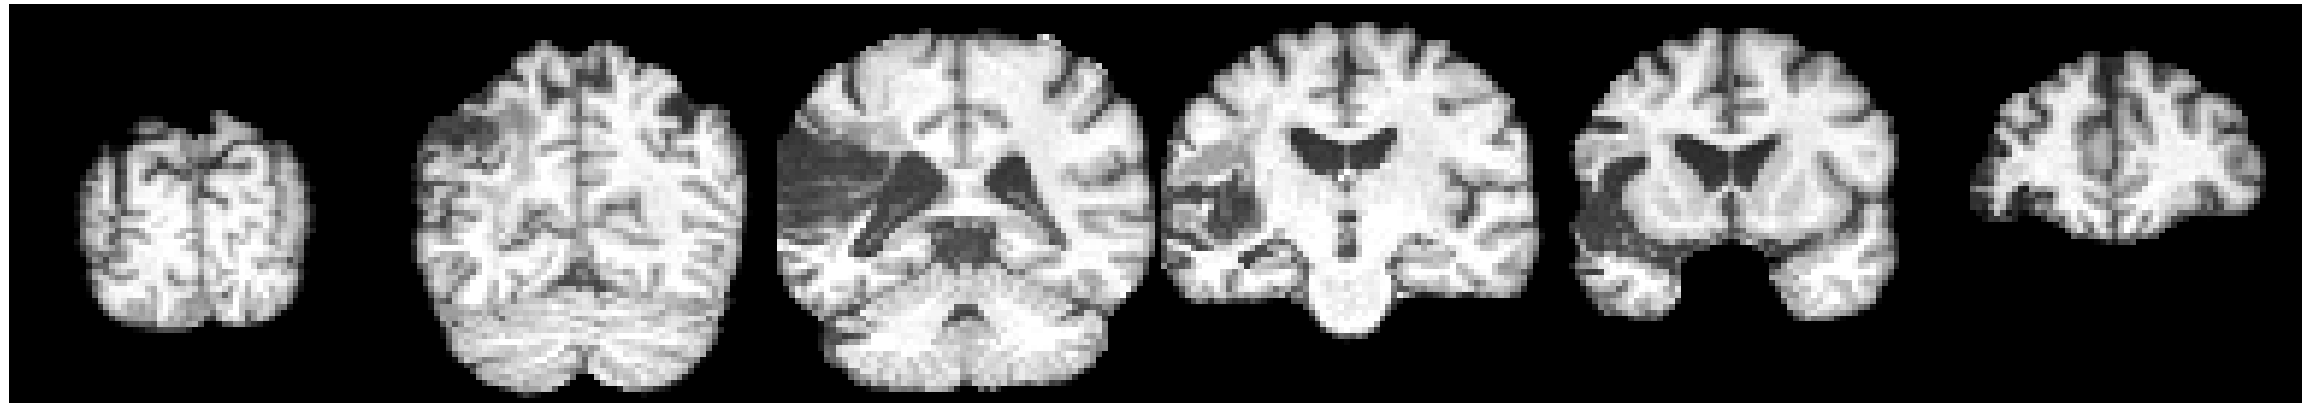

Lesion Overlay

red = Manual Tracing  
blue = LINDA prediction

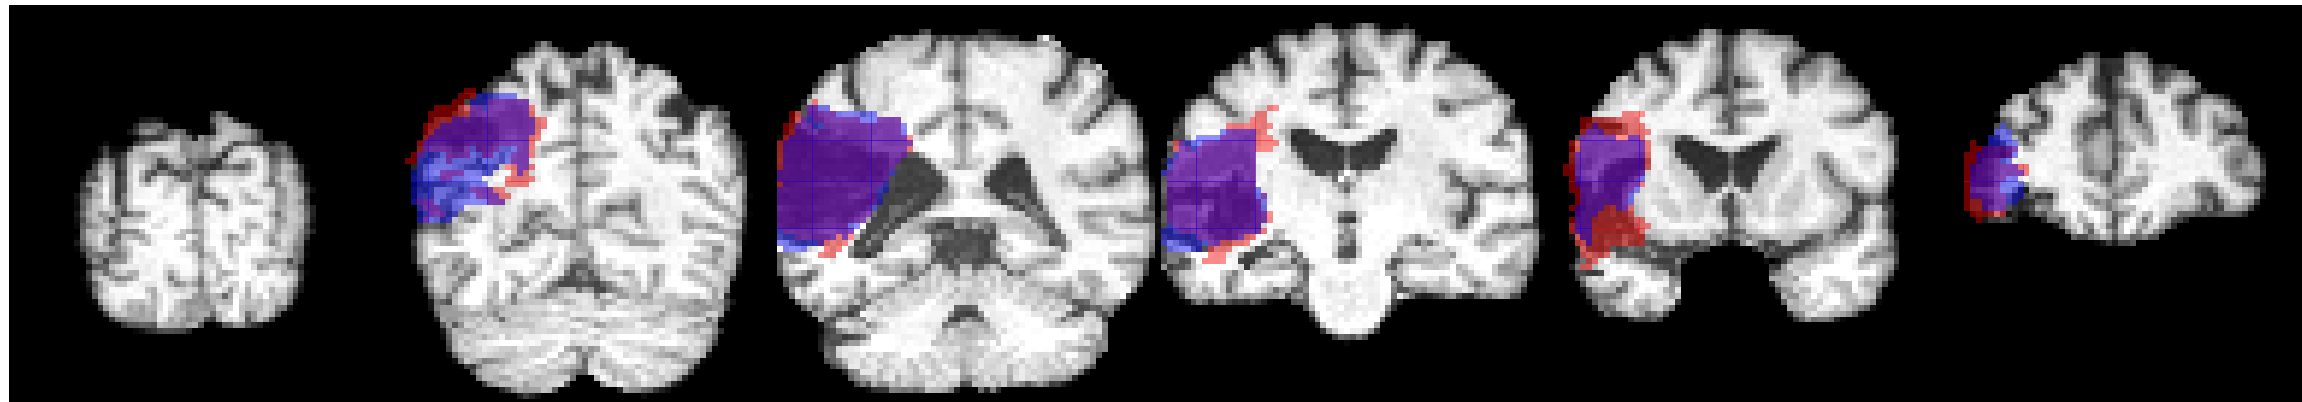

## Subject 12 – FTH

|                                          | Value   |
|------------------------------------------|---------|
| Lesion Volume (ml)                       | 145.224 |
| Dice Coefficient                         | 0.749   |
| Jaccard Coefficient                      | 0.599   |
| Hausdorff Distance (mm)                  | 24.495  |
| Average Displacement (mm)                | 2.718   |
| Sensitivity (Recall, true positive rate) | 0.74    |
| Specificity (true negative rate)         | 0.996   |

Normalized T1

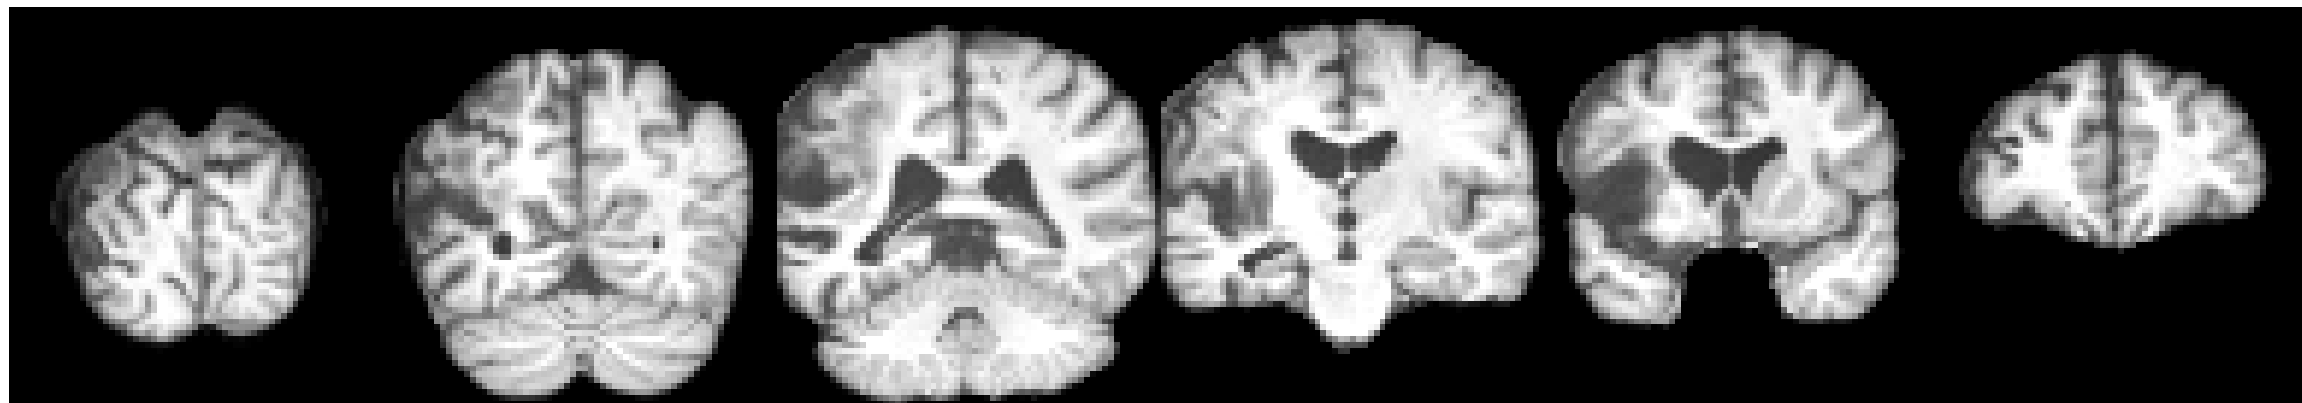

Lesion Overlay

red = Manual Tracing  
blue = LINDA prediction

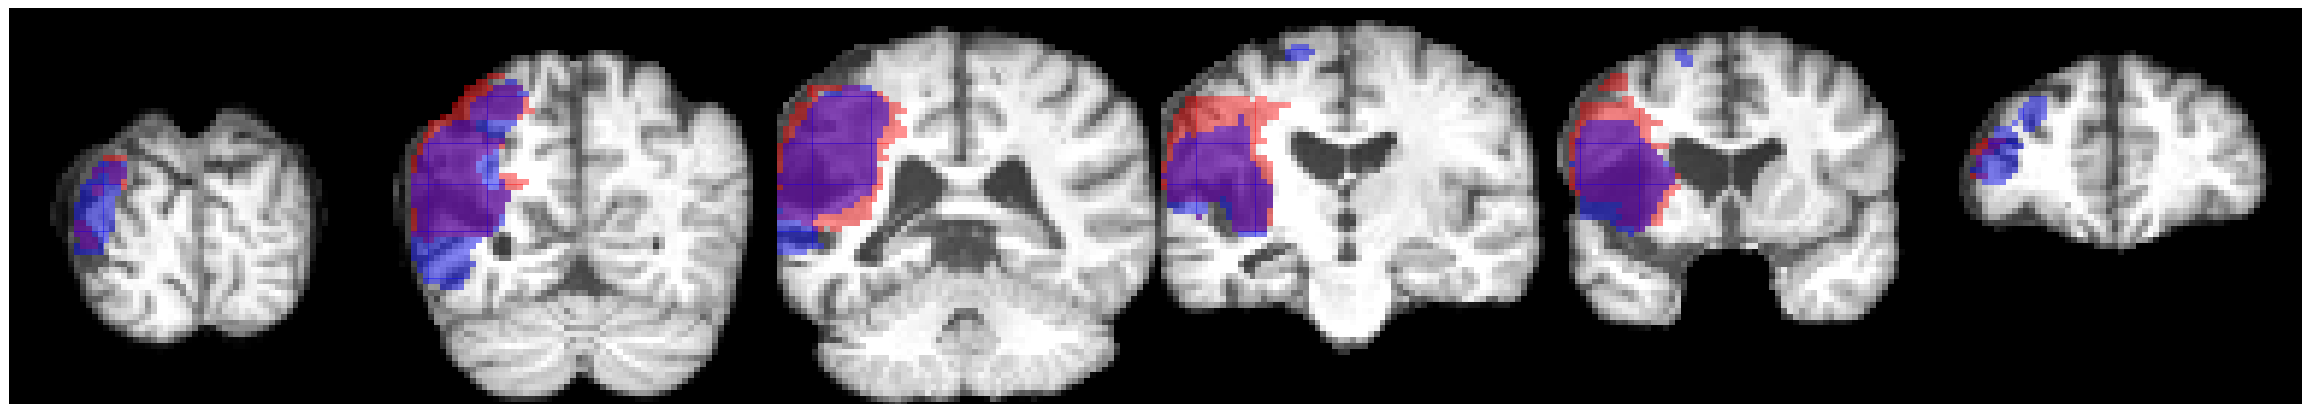

# Subject 13 – GAR

|                                          | Value |
|------------------------------------------|-------|
| Lesion Volume (ml)                       | 114.6 |
| Dice Coefficient                         | 0.738 |
| Jaccard Coefficient                      | 0.585 |
| Hausdorff Distance (mm)                  | 15.1  |
| Average Displacement (mm)                | 3.141 |
| Sensitivity (Recall, true positive rate) | 0.654 |
| Specificity (true negative rate)         | 0.998 |

Normalized T1

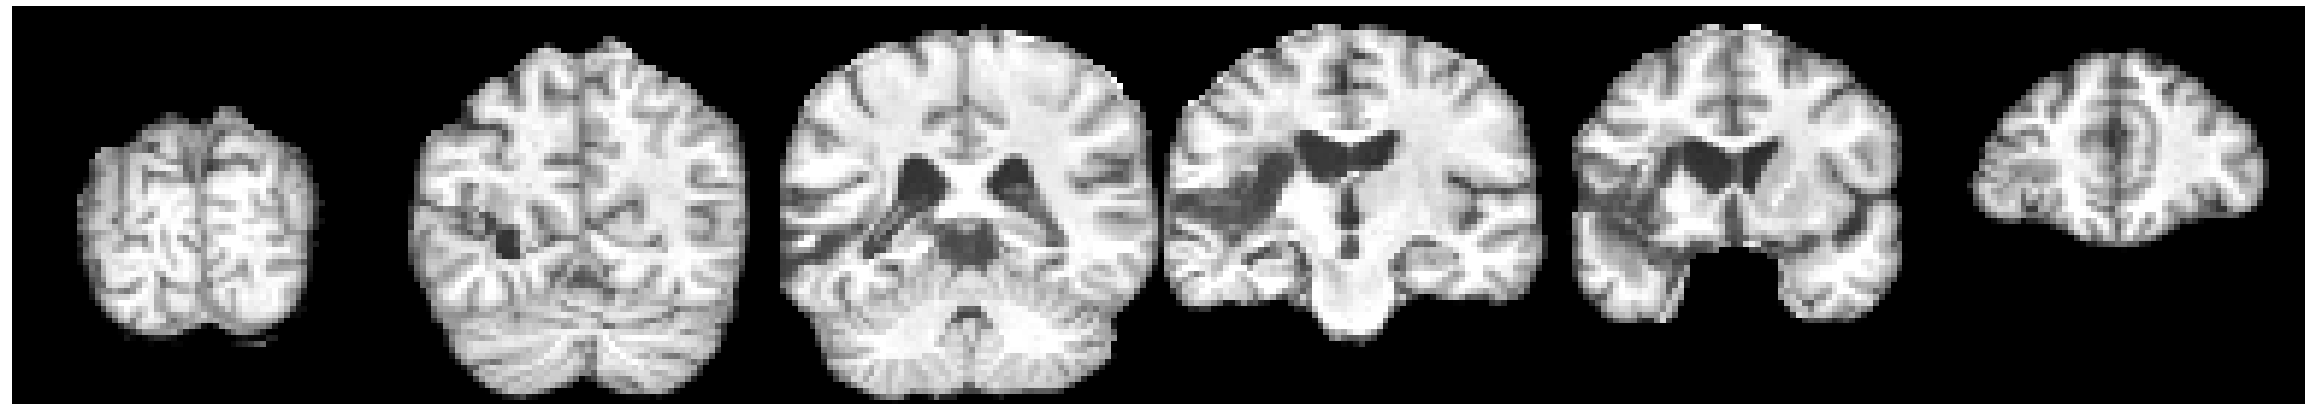

Lesion Overlay

red = Manual Tracing  
blue = LINDA prediction

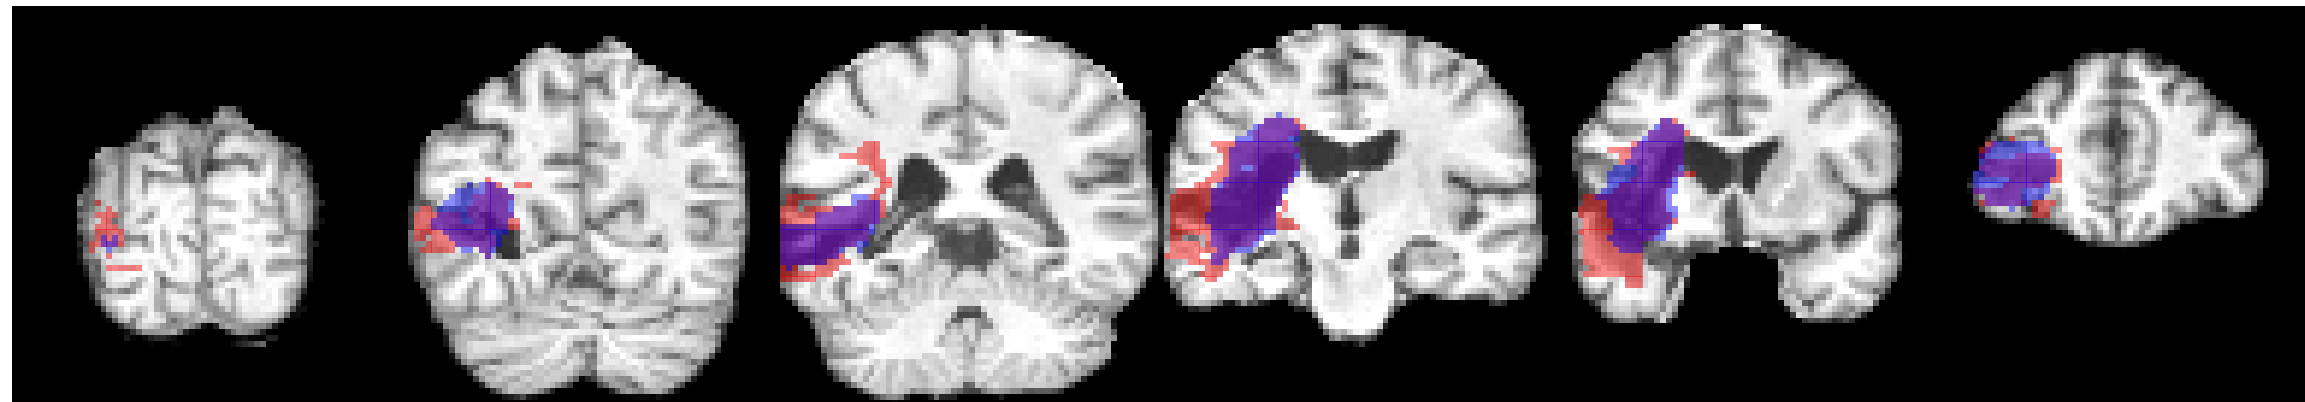

# Subject 14 – GCL

|                                          | Value  |
|------------------------------------------|--------|
| Lesion Volume (ml)                       | 17.28  |
| Dice Coefficient                         | 0.125  |
| Jaccard Coefficient                      | 0.067  |
| Hausdorff Distance (mm)                  | 44.317 |
| Average Displacement (mm)                | 1.808  |
| Sensitivity (Recall, true positive rate) | 0.09   |
| Specificity (true negative rate)         | 0.999  |

Normalized T1

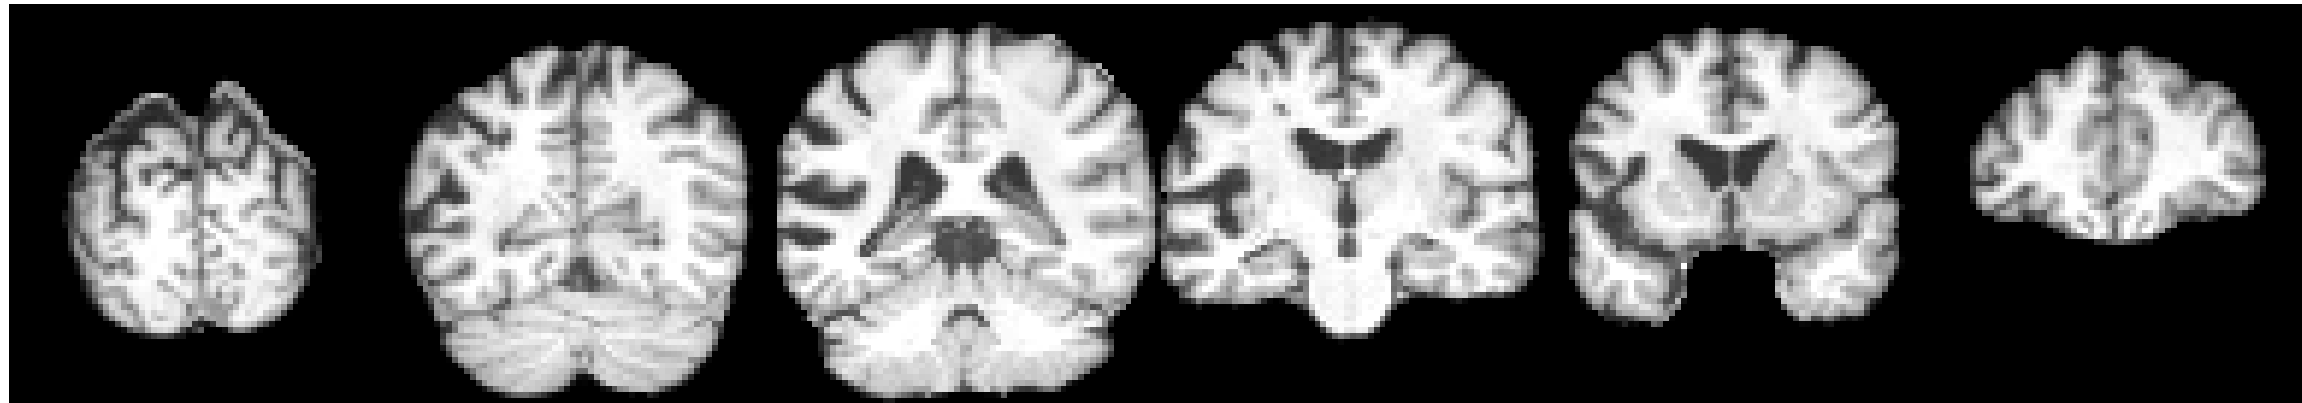

Lesion Overlay

red = Manual Tracing  
blue = LINDA prediction

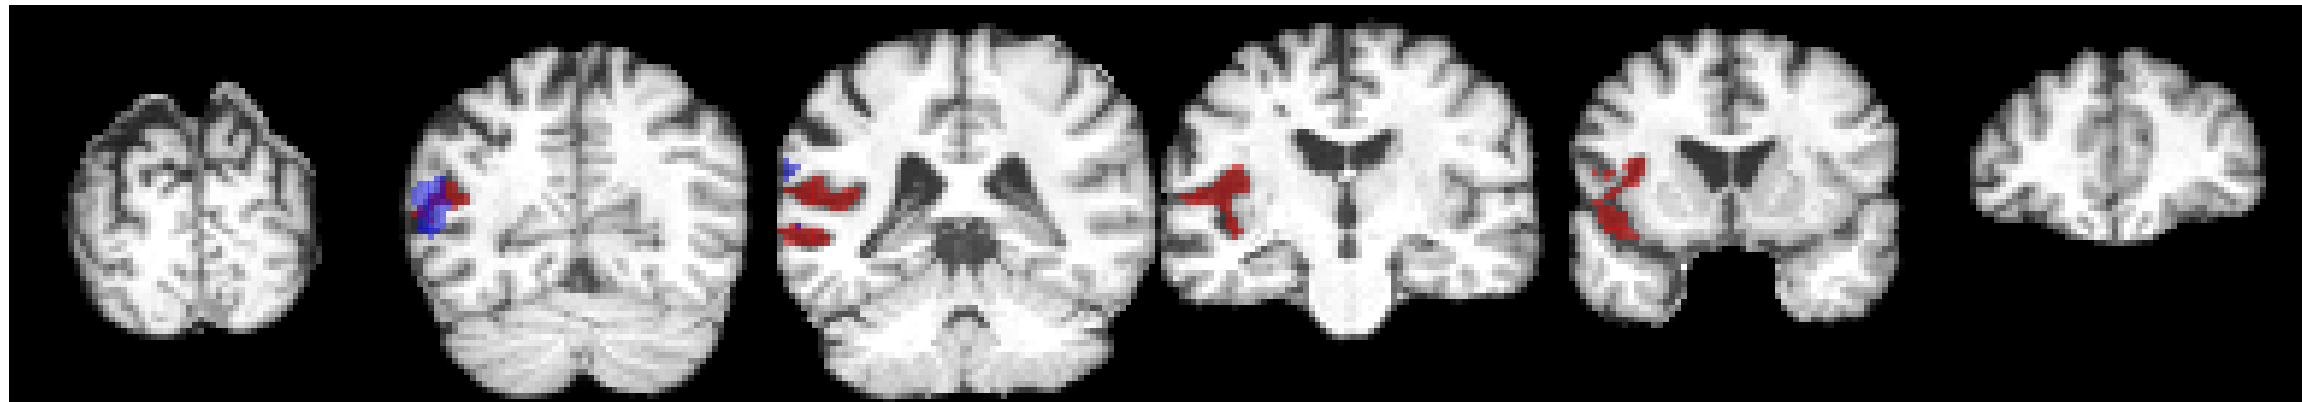

# Subject 15 – HLL

|                                          | Value  |
|------------------------------------------|--------|
| Lesion Volume (ml)                       | 91.24  |
| Dice Coefficient                         | 0.703  |
| Jaccard Coefficient                      | 0.542  |
| Hausdorff Distance (mm)                  | 14.422 |
| Average Displacement (mm)                | 2.173  |
| Sensitivity (Recall, true positive rate) | 0.626  |
| Specificity (true negative rate)         | 0.998  |

Normalized T1

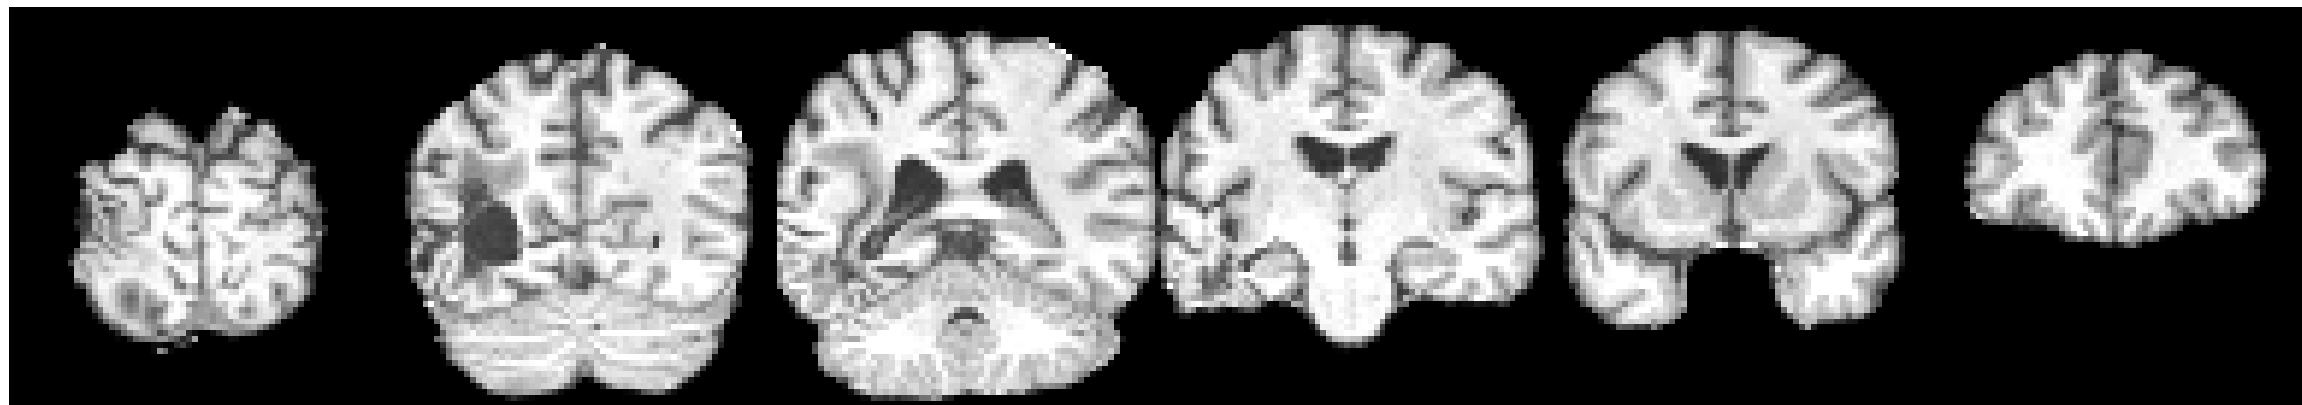

Lesion Overlay

red = Manual Tracing  
blue = LINDA prediction

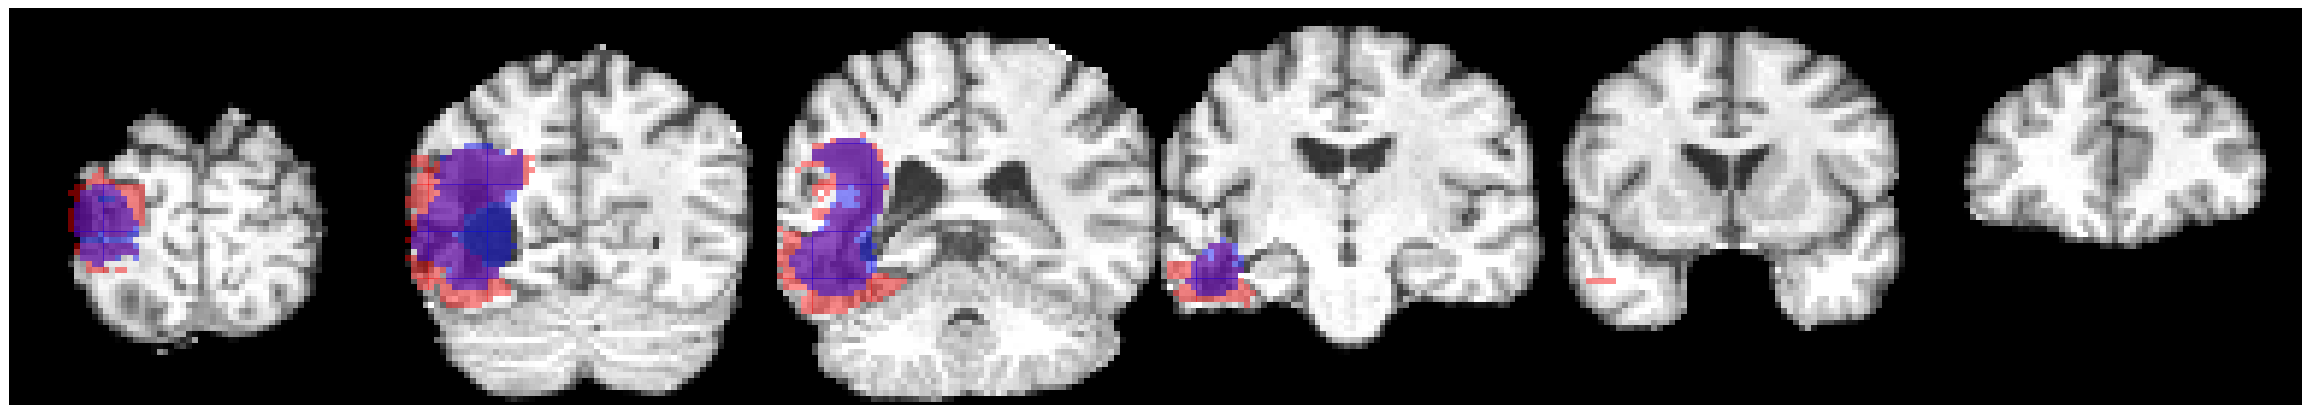

# Subject 16 – HPY

|                                          | Value   |
|------------------------------------------|---------|
| Lesion Volume (ml)                       | 115.464 |
| Dice Coefficient                         | 0.83    |
| Jaccard Coefficient                      | 0.709   |
| Hausdorff Distance (mm)                  | 16.613  |
| Average Displacement (mm)                | 1.145   |
| Sensitivity (Recall, true positive rate) | 0.744   |
| Specificity (true negative rate)         | 0.999   |

Normalized T1

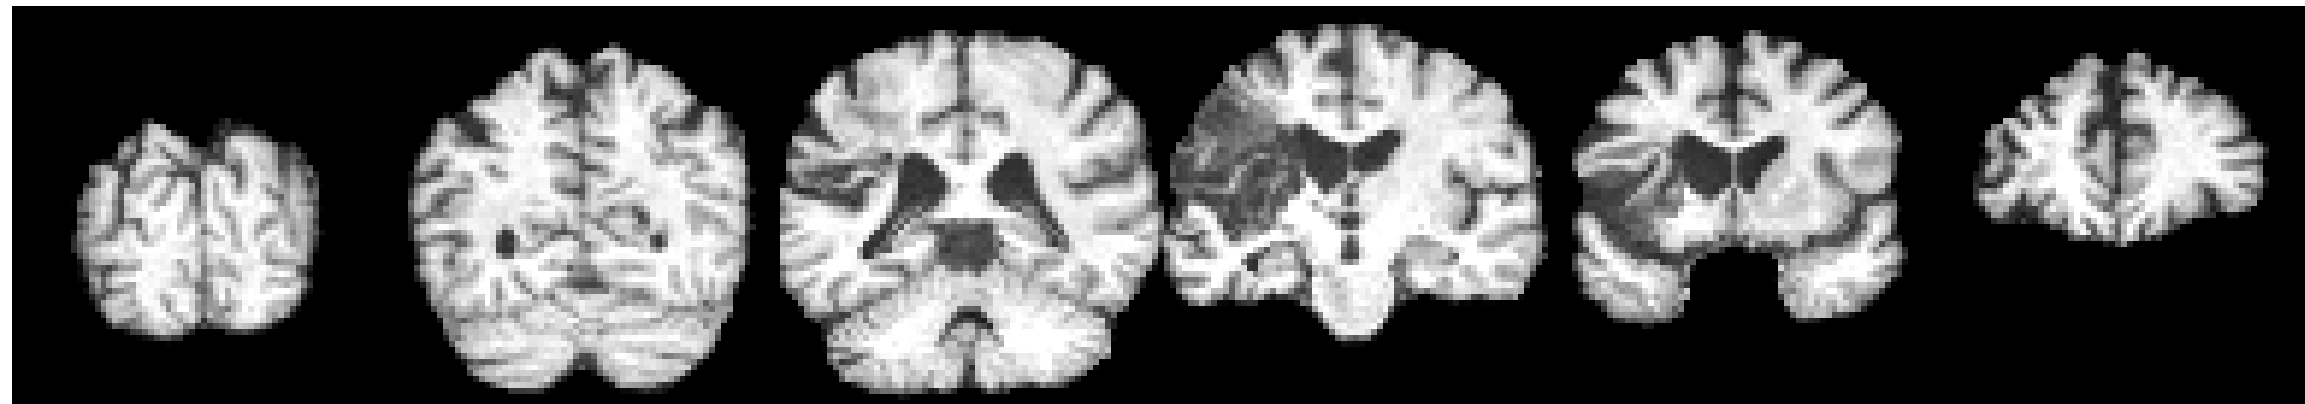

Lesion Overlay

red = Manual Tracing  
blue = LINDA prediction

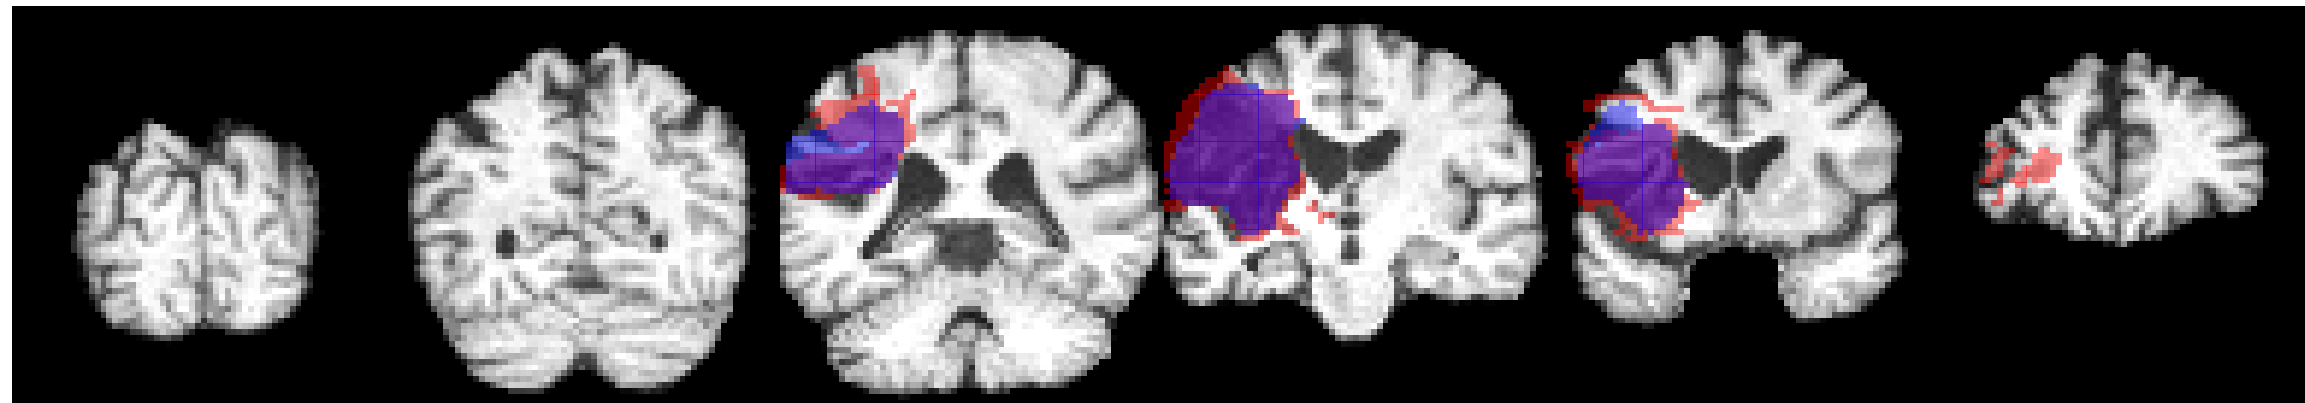



# Subject 17 – ICY

|                                          | Value  |
|------------------------------------------|--------|
| Lesion Volume (ml)                       | 40.936 |
| Dice Coefficient                         | 0.611  |
| Jaccard Coefficient                      | 0.44   |
| Hausdorff Distance (mm)                  | 16.125 |
| Average Displacement (mm)                | 2.763  |
| Sensitivity (Recall, true positive rate) | 0.493  |
| Specificity (true negative rate)         | 0.999  |

Normalized T1

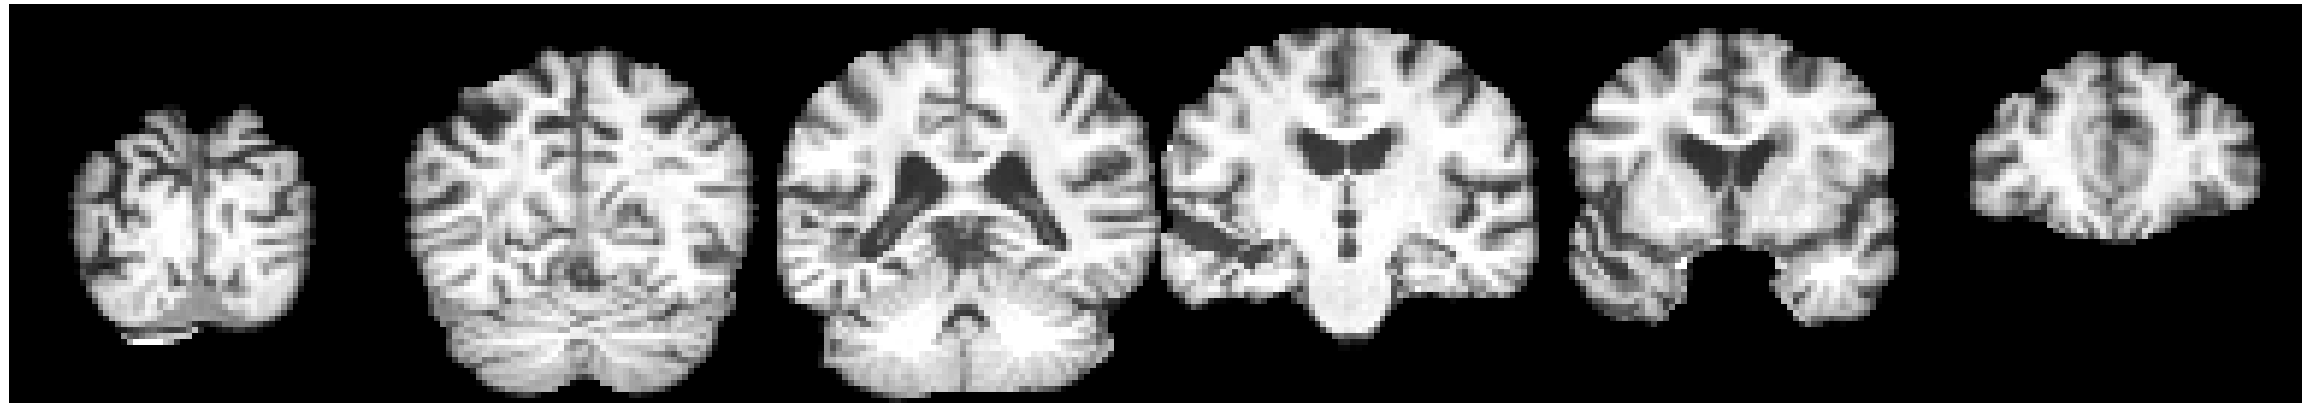

Lesion Overlay

red = Manual Tracing  
blue = LINDA prediction

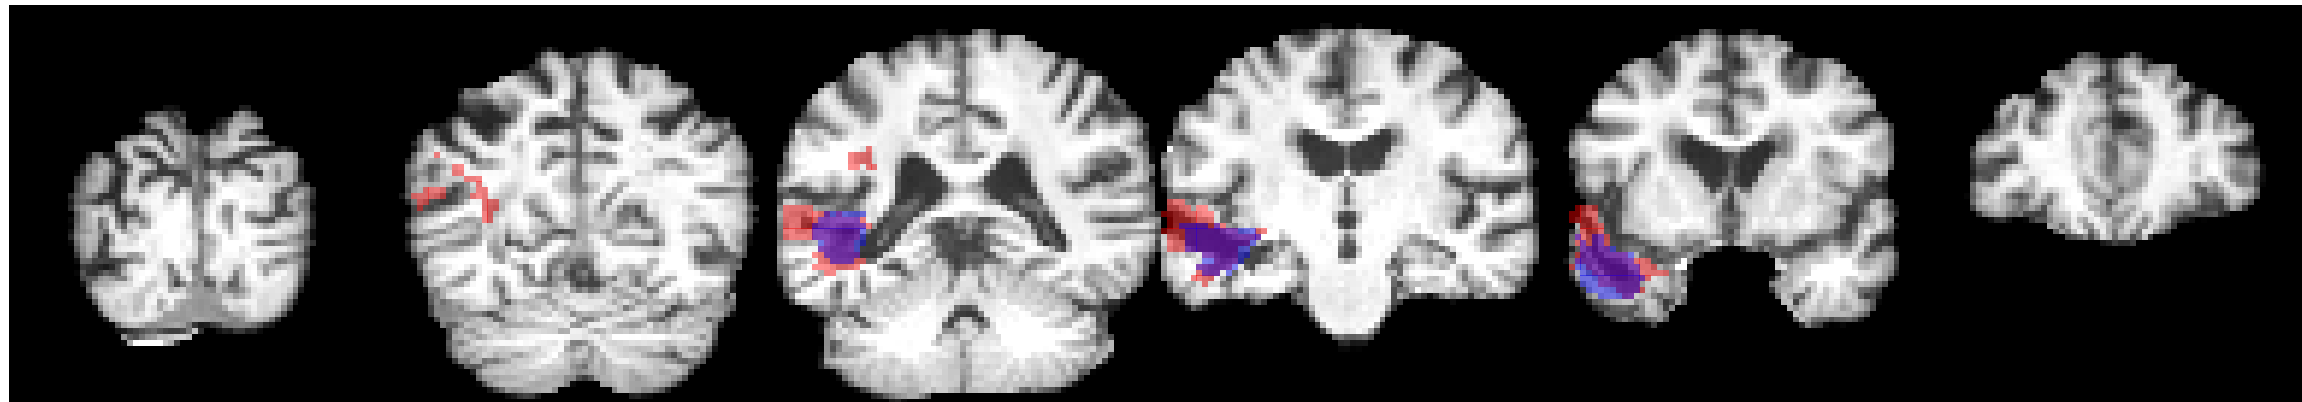

# Subject 18 – IEB

|                                          | Value   |
|------------------------------------------|---------|
| Lesion Volume (ml)                       | 149.416 |
| Dice Coefficient                         | 0.854   |
| Jaccard Coefficient                      | 0.745   |
| Hausdorff Distance (mm)                  | 27.857  |
| Average Displacement (mm)                | 1.906   |
| Sensitivity (Recall, true positive rate) | 0.835   |
| Specificity (true negative rate)         | 0.998   |

Normalized T1

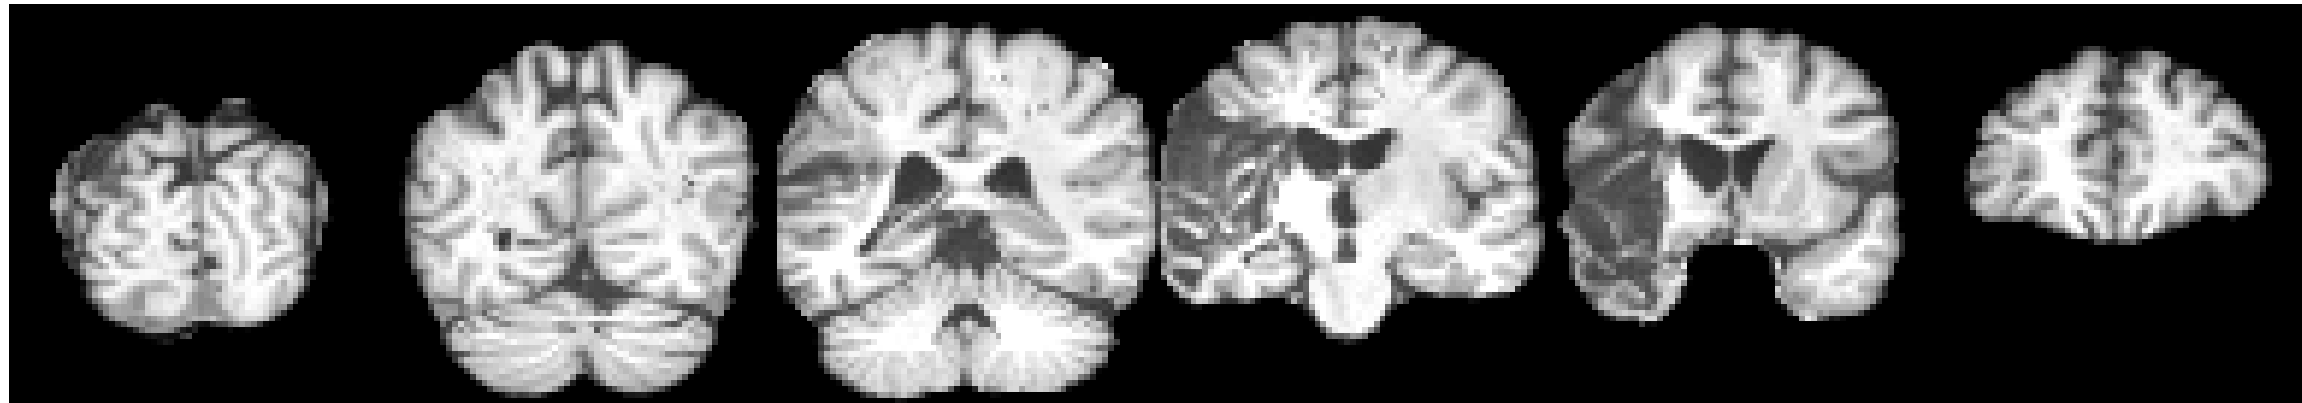

Lesion Overlay

red = Manual Tracing  
blue = LINDA prediction

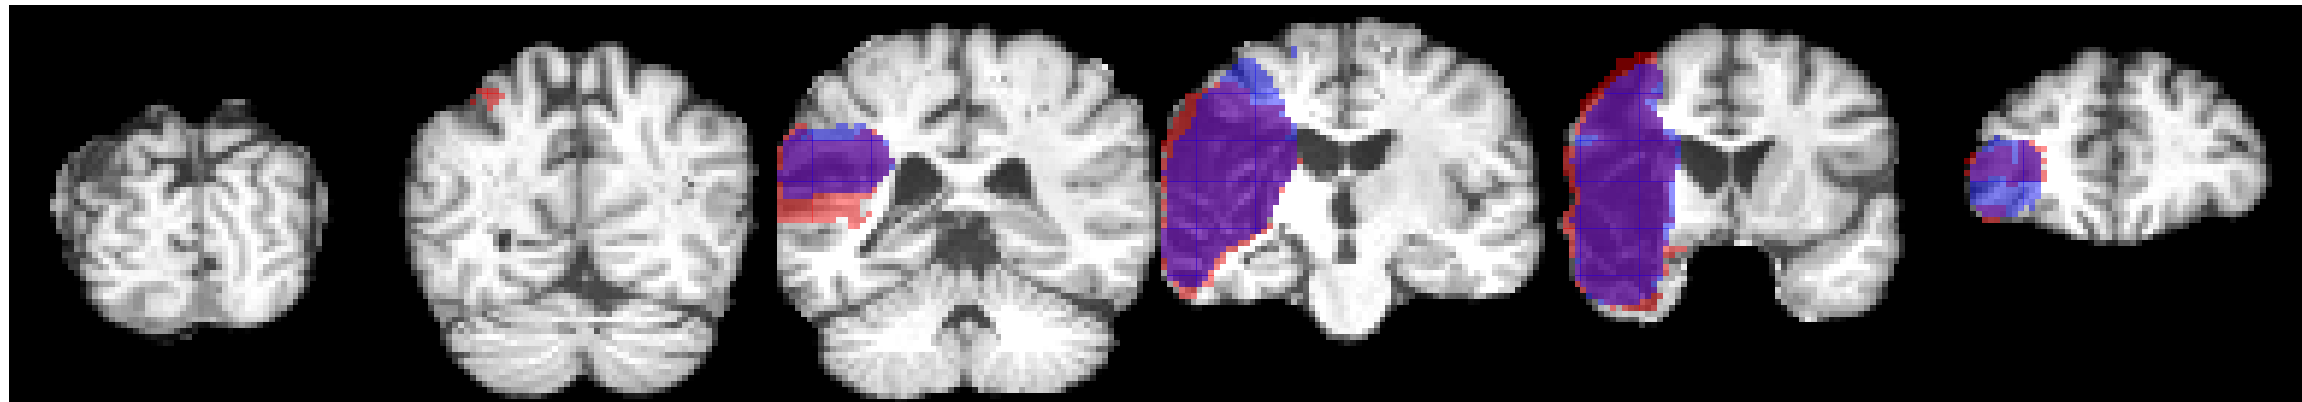

# Subject 19 – JVC

|                                          | Value   |
|------------------------------------------|---------|
| Lesion Volume (ml)                       | 135.744 |
| Dice Coefficient                         | 0.741   |
| Jaccard Coefficient                      | 0.589   |
| Hausdorff Distance (mm)                  | 25.14   |
| Average Displacement (mm)                | 1.679   |
| Sensitivity (Recall, true positive rate) | 0.646   |
| Specificity (true negative rate)         | 0.998   |

Normalized T1

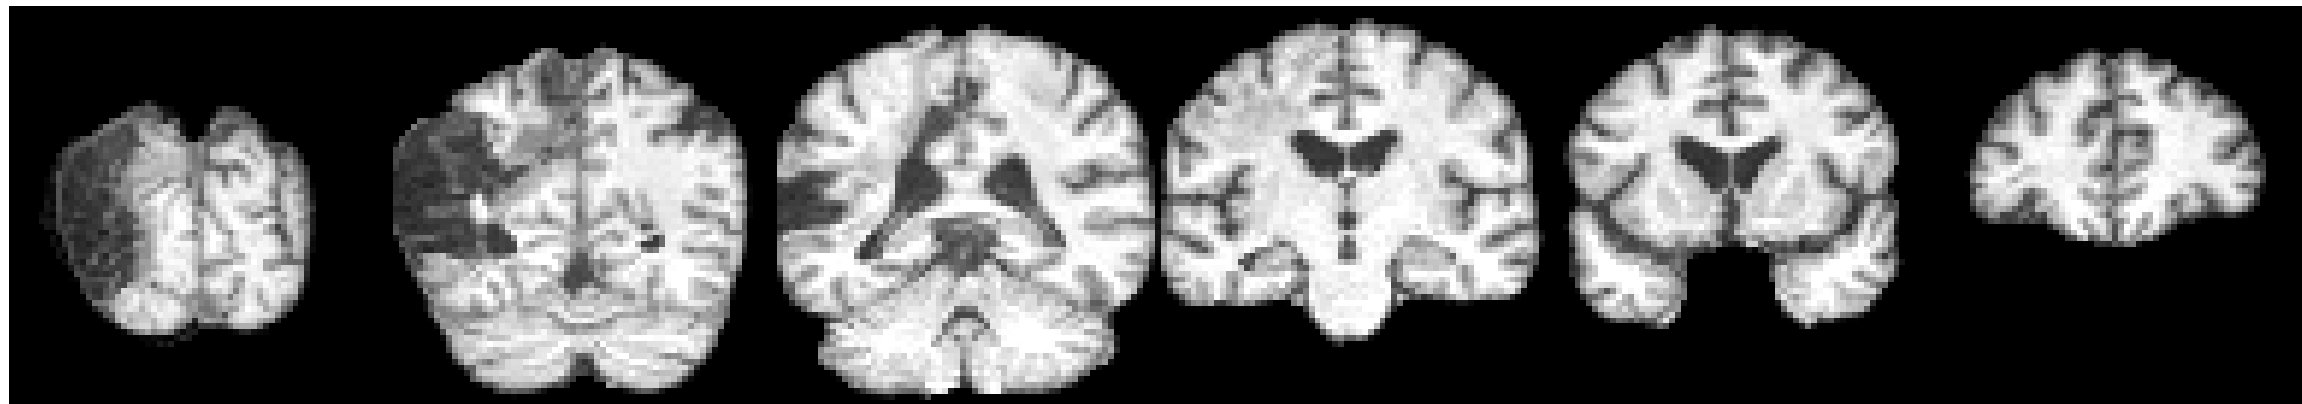

Lesion Overlay

red = Manual Tracing  
blue = LINDA prediction

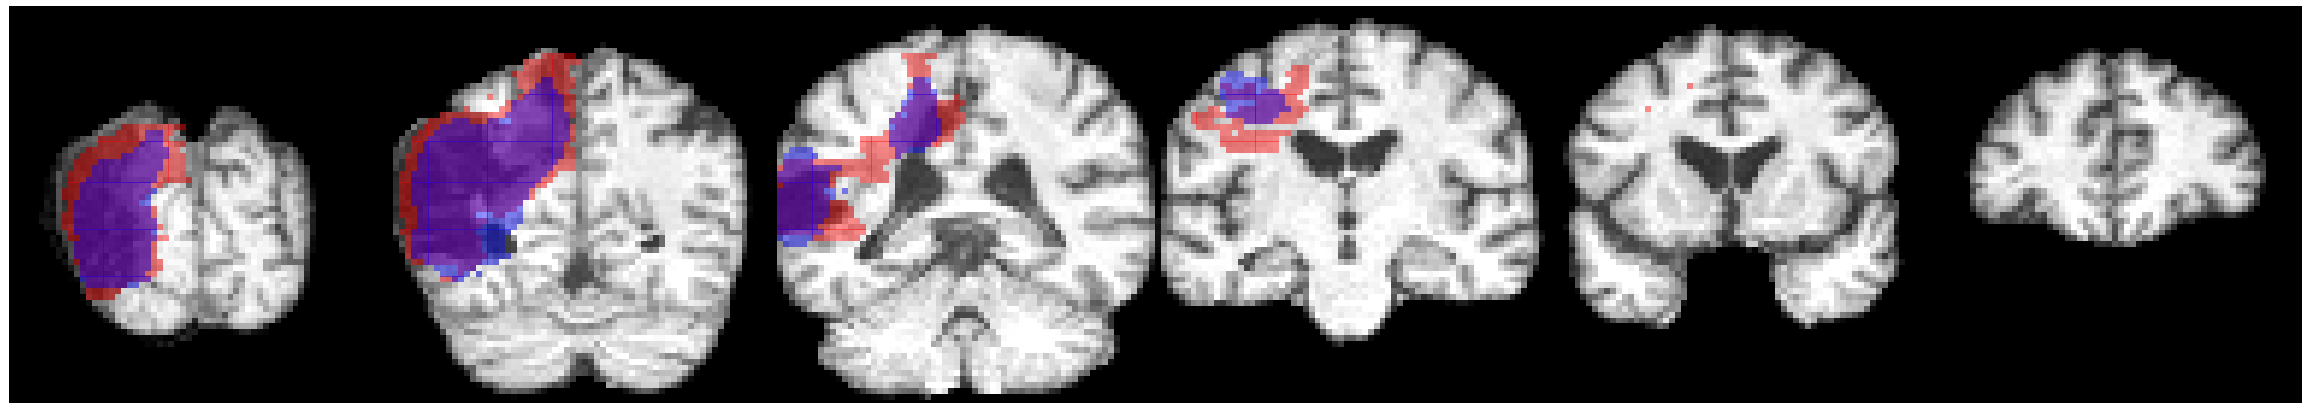

# Subject 20 – KAP

|                                          | Value  |
|------------------------------------------|--------|
| Lesion Volume (ml)                       | 26.224 |
| Dice Coefficient                         | 0.597  |
| Jaccard Coefficient                      | 0.426  |
| Hausdorff Distance (mm)                  | 32.863 |
| Average Displacement (mm)                | 2.927  |
| Sensitivity (Recall, true positive rate) | 0.614  |
| Specificity (true negative rate)         | 0.999  |

Normalized T1

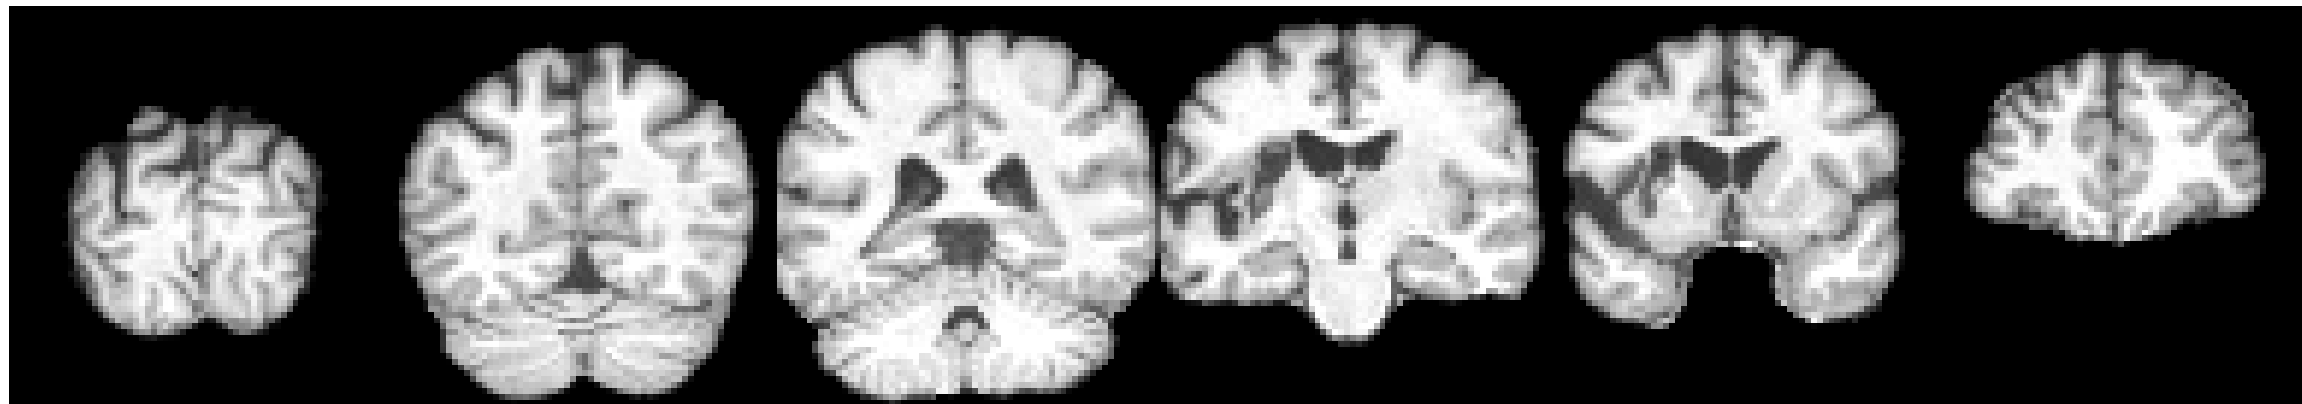

Lesion Overlay

red = Manual Tracing  
blue = LINDA prediction

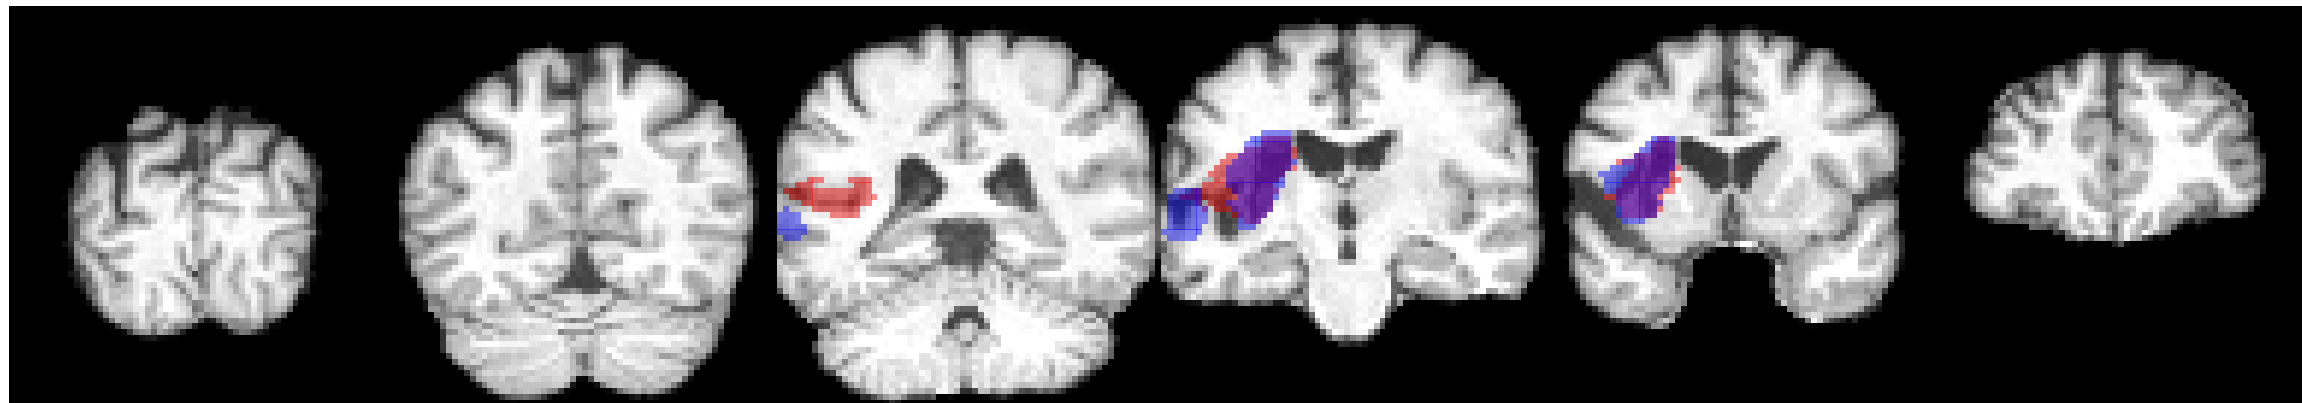

# Subject 21 – KGX

|                                          | Value  |
|------------------------------------------|--------|
| Lesion Volume (ml)                       | 204.08 |
| Dice Coefficient                         | 0.682  |
| Jaccard Coefficient                      | 0.518  |
| Hausdorff Distance (mm)                  | 21.354 |
| Average Displacement (mm)                | 2.106  |
| Sensitivity (Recall, true positive rate) | 0.533  |
| Specificity (true negative rate)         | 0.999  |

Normalized T1

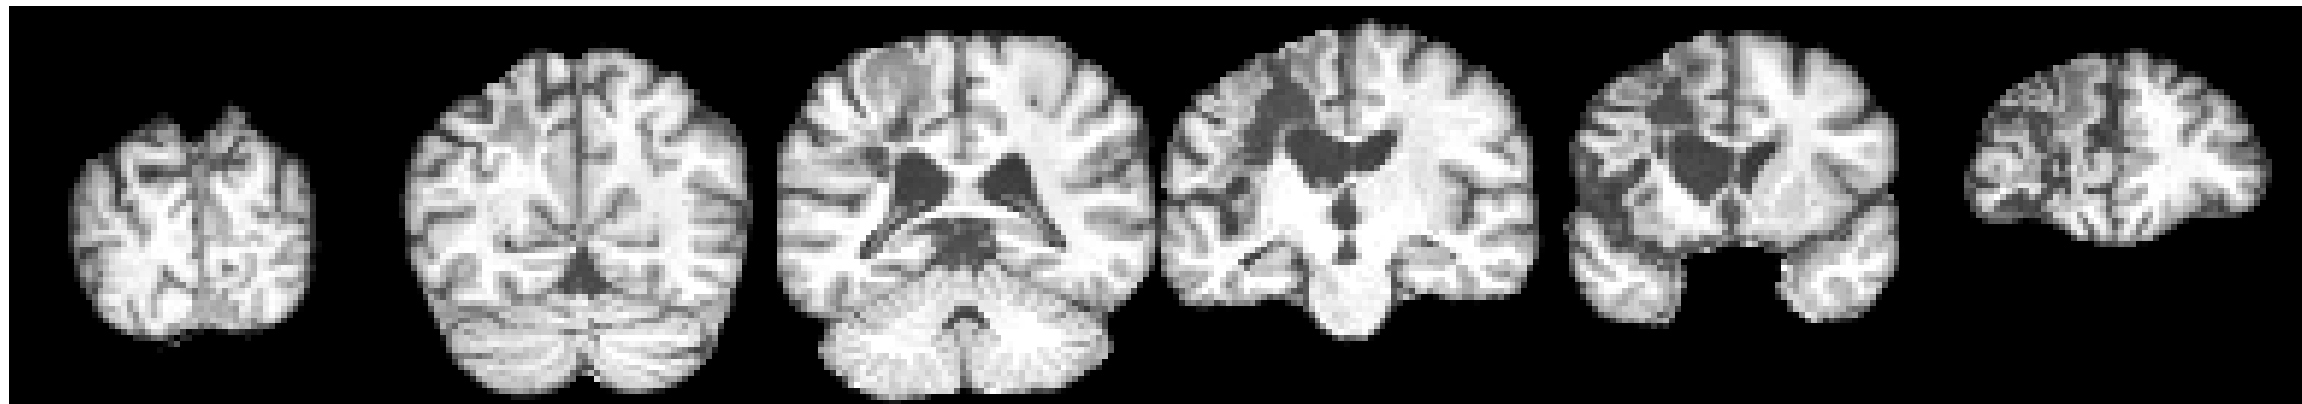

Lesion Overlay

red = Manual Tracing  
blue = LINDA prediction

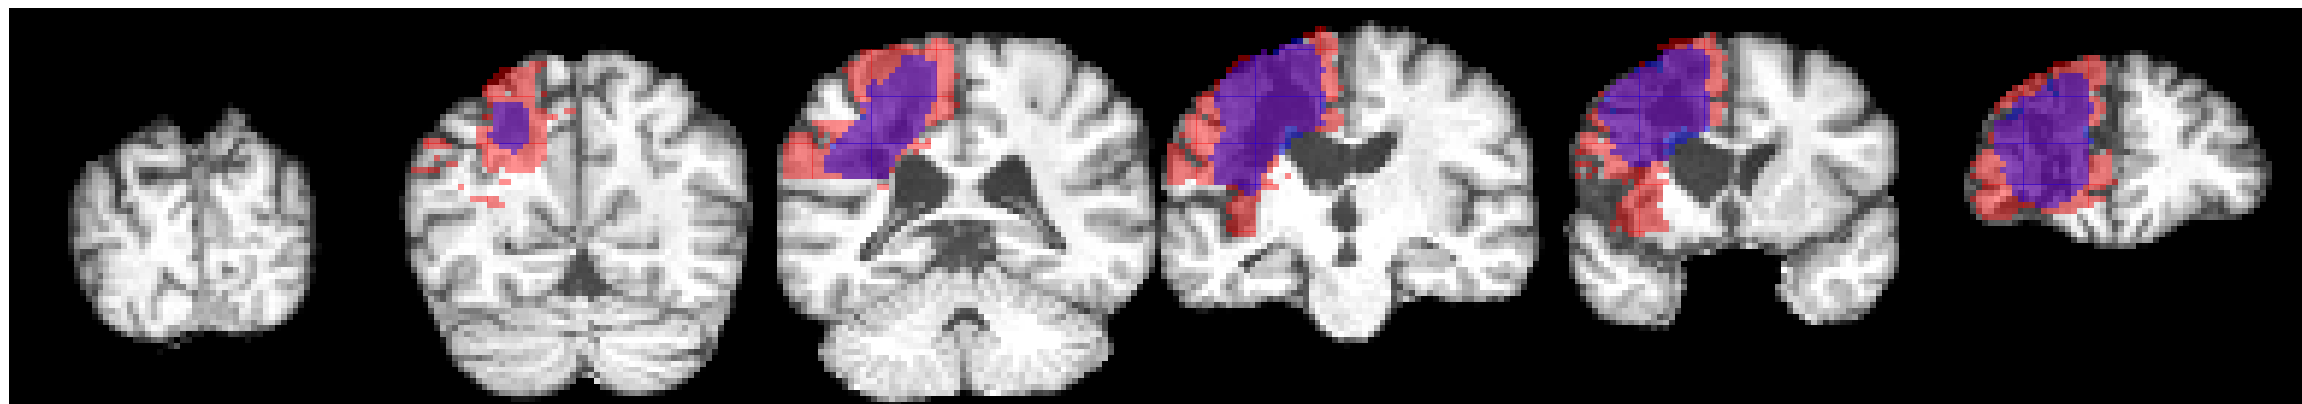

# Subject 22 – LJL

|                                          | Value   |
|------------------------------------------|---------|
| Lesion Volume (ml)                       | 137.384 |
| Dice Coefficient                         | 0.838   |
| Jaccard Coefficient                      | 0.721   |
| Hausdorff Distance (mm)                  | 16      |
| Average Displacement (mm)                | 1.507   |
| Sensitivity (Recall, true positive rate) | 0.79    |
| Specificity (true negative rate)         | 0.998   |

Normalized T1

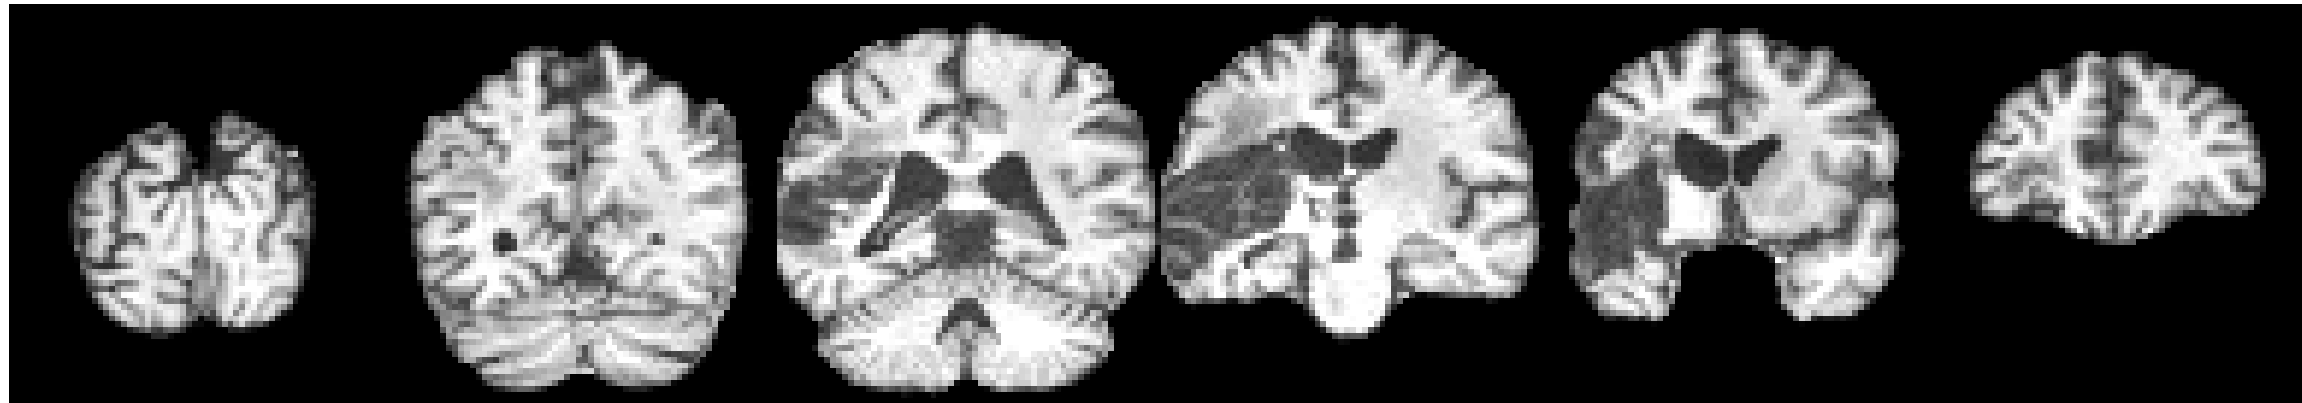

Lesion Overlay

red = Manual Tracing  
blue = LINDA prediction

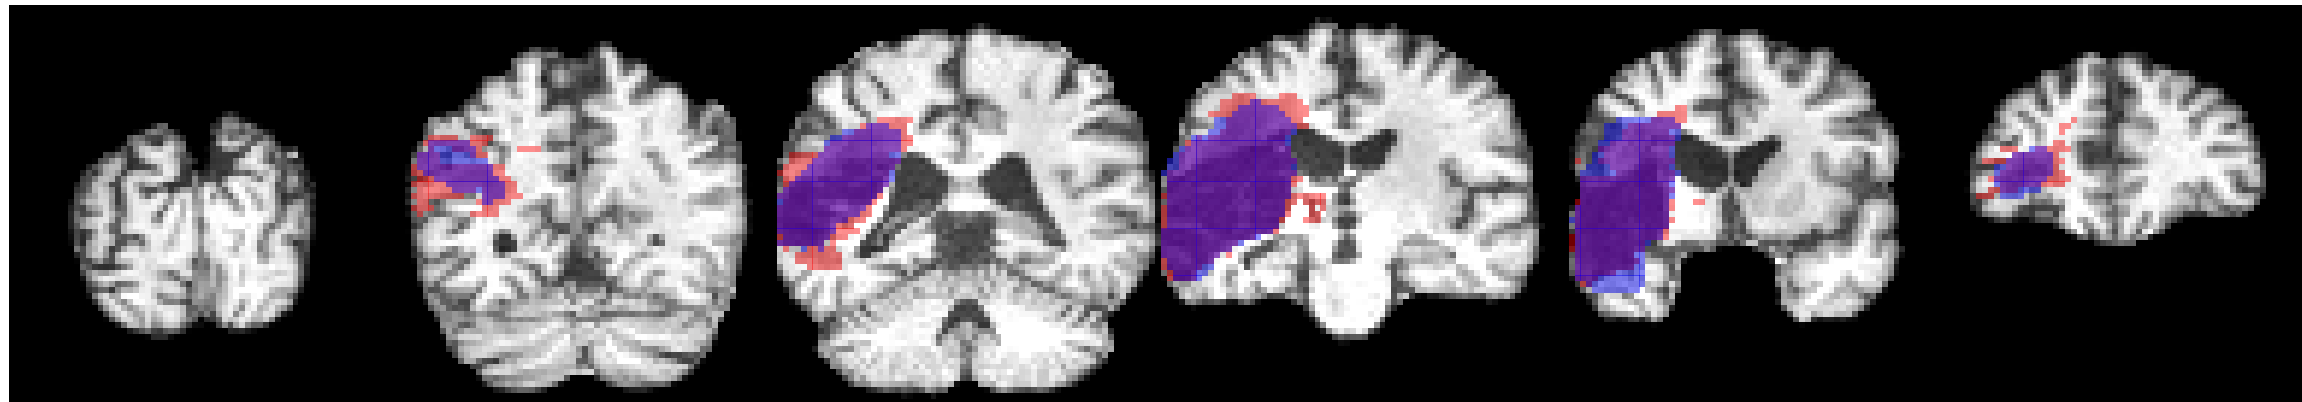

# Subject 23 – LSW

|                                          | Value   |
|------------------------------------------|---------|
| Lesion Volume (ml)                       | 115.256 |
| Dice Coefficient                         | 0.827   |
| Jaccard Coefficient                      | 0.704   |
| Hausdorff Distance (mm)                  | 28.914  |
| Average Displacement (mm)                | 4.363   |
| Sensitivity (Recall, true positive rate) | 0.78    |
| Specificity (true negative rate)         | 0.998   |

Normalized T1

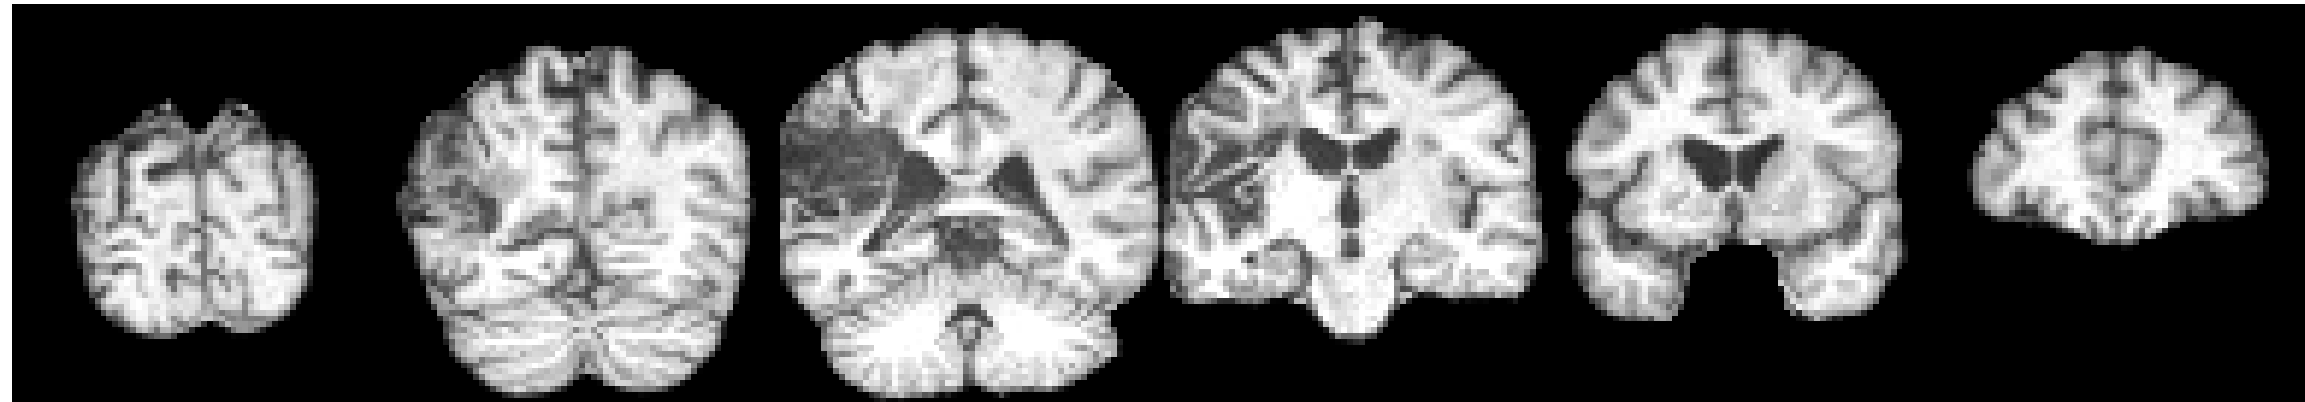

Lesion Overlay

red = Manual Tracing  
blue = LINDA prediction

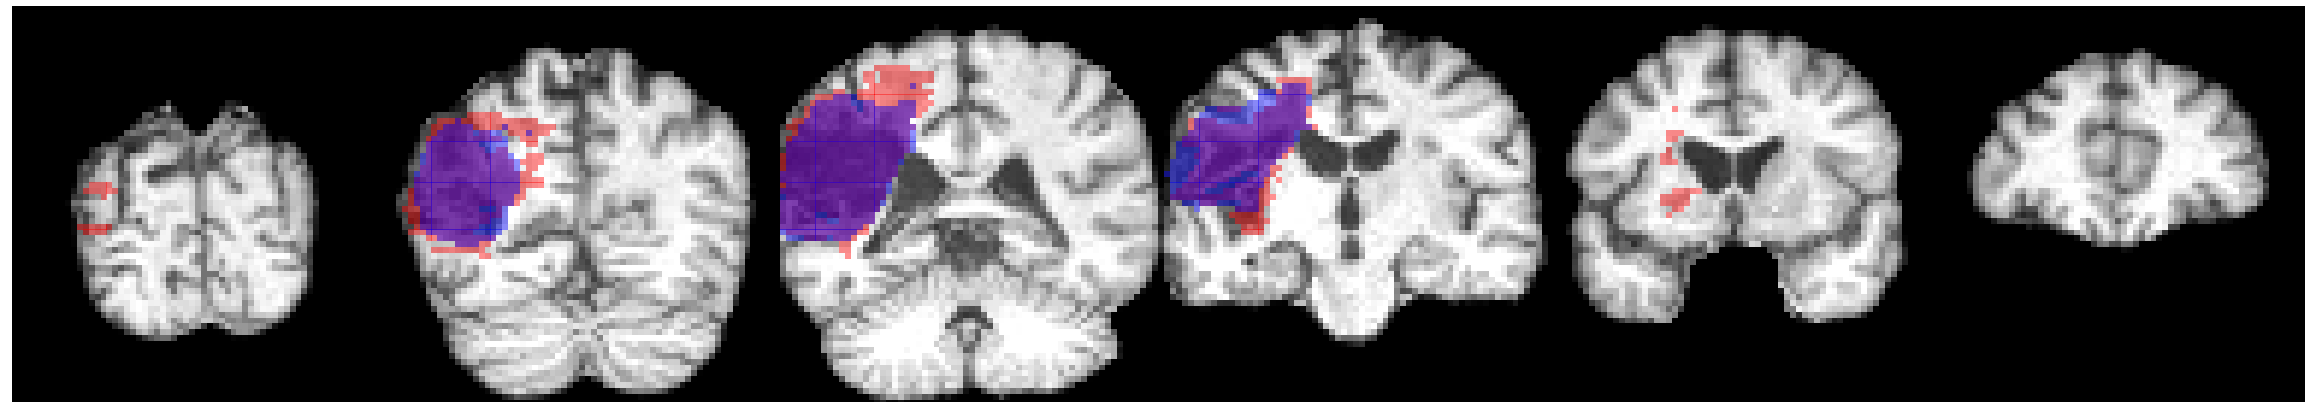

## Subject 24 – MLM

|                                          | Value  |
|------------------------------------------|--------|
| Lesion Volume (ml)                       | 29.512 |
| Dice Coefficient                         | 0.662  |
| Jaccard Coefficient                      | 0.495  |
| Hausdorff Distance (mm)                  | 21.26  |
| Average Displacement (mm)                | 2.185  |
| Sensitivity (Recall, true positive rate) | 0.659  |
| Specificity (true negative rate)         | 0.999  |

Normalized T1

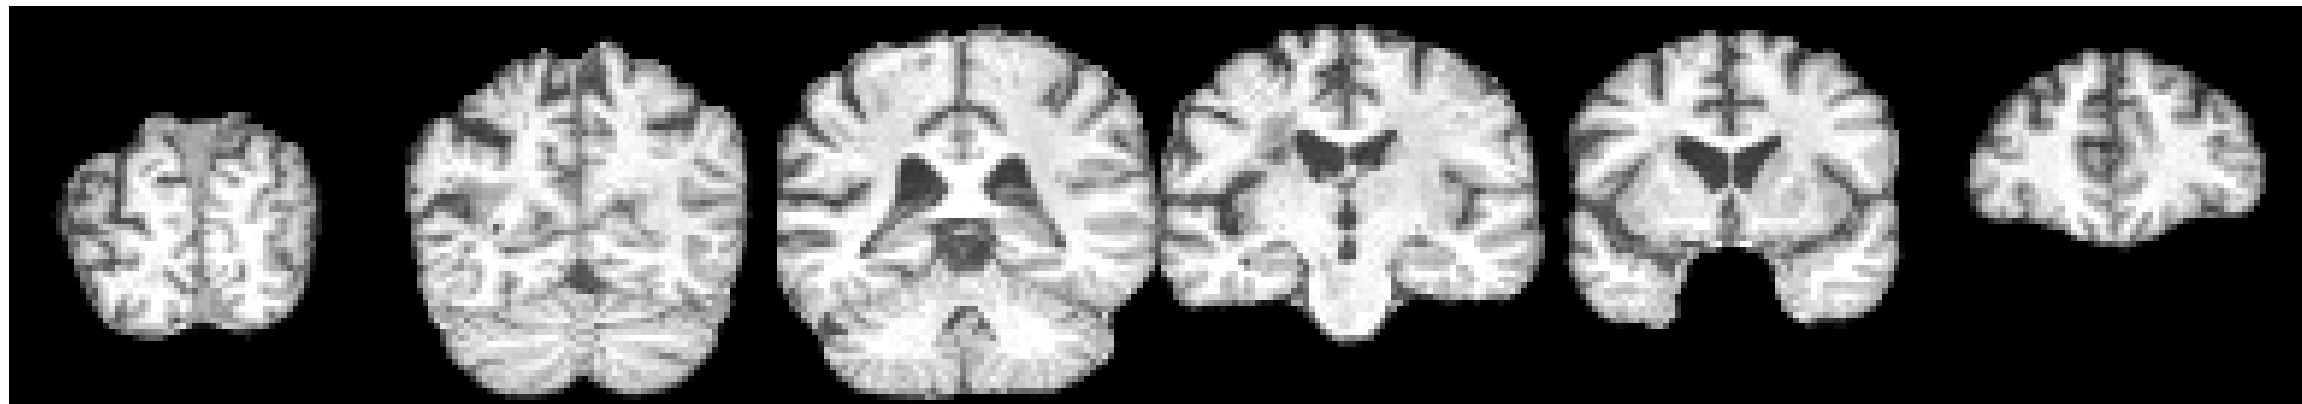

Lesion Overlay

red = Manual Tracing  
blue = LINDA prediction

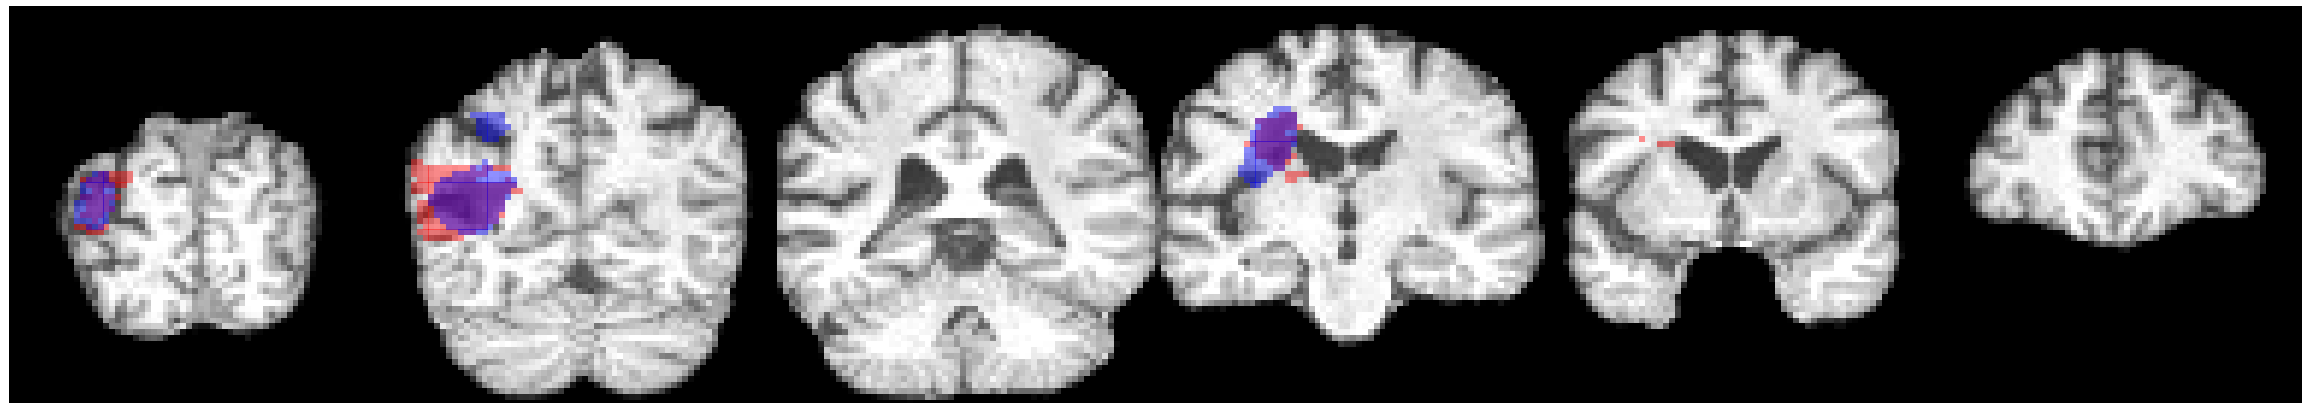



# Subject 25 – MLO

|                                          | Value  |
|------------------------------------------|--------|
| Lesion Volume (ml)                       | 37.136 |
| Dice Coefficient                         | 0.777  |
| Jaccard Coefficient                      | 0.635  |
| Hausdorff Distance (mm)                  | 8.485  |
| Average Displacement (mm)                | 7.75   |
| Sensitivity (Recall, true positive rate) | 0.838  |
| Specificity (true negative rate)         | 0.999  |

Normalized T1

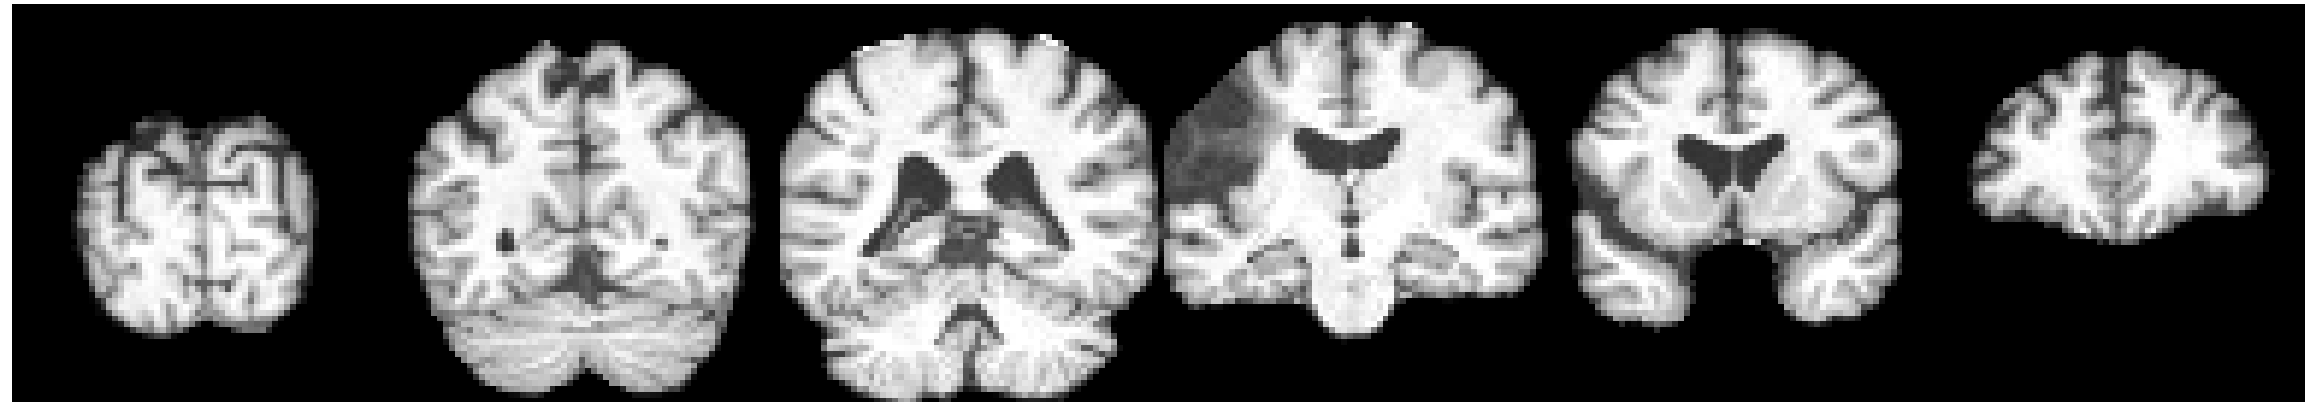

Lesion Overlay

red = Manual Tracing  
blue = LINDA prediction

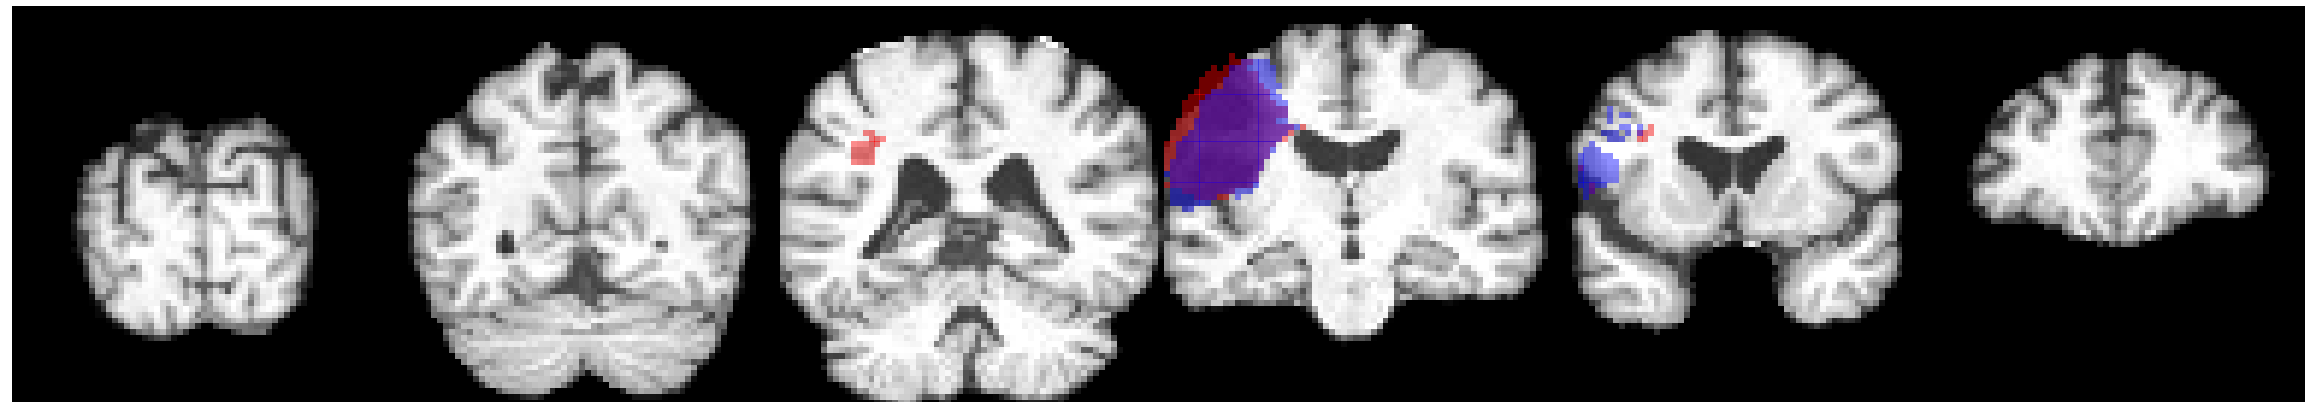

## Subject 26 – MLU

|                                          | Value |
|------------------------------------------|-------|
| Lesion Volume (ml)                       | 57.2  |
| Dice Coefficient                         | 0.788 |
| Jaccard Coefficient                      | 0.65  |
| Hausdorff Distance (mm)                  | 18    |
| Average Displacement (mm)                | 2.462 |
| Sensitivity (Recall, true positive rate) | 0.698 |
| Specificity (true negative rate)         | 0.999 |

Normalized T1

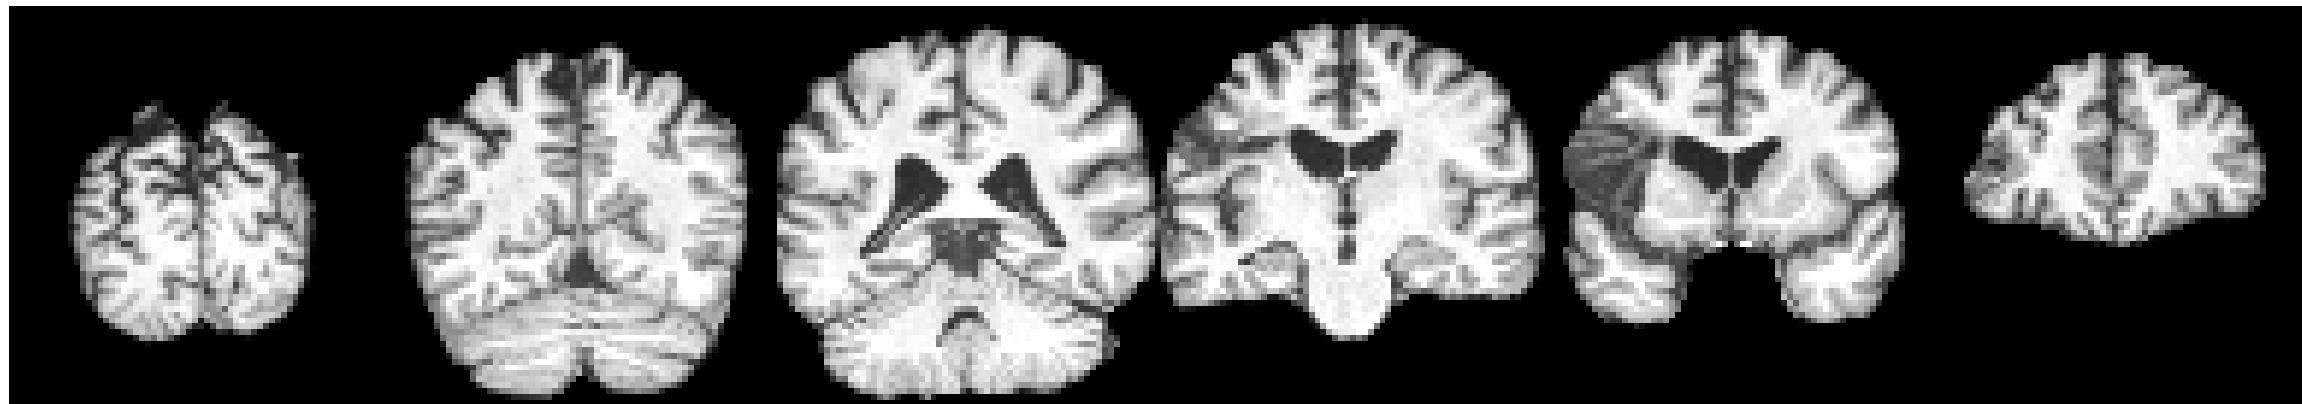

Lesion Overlay

red = Manual Tracing  
blue = LINDA prediction

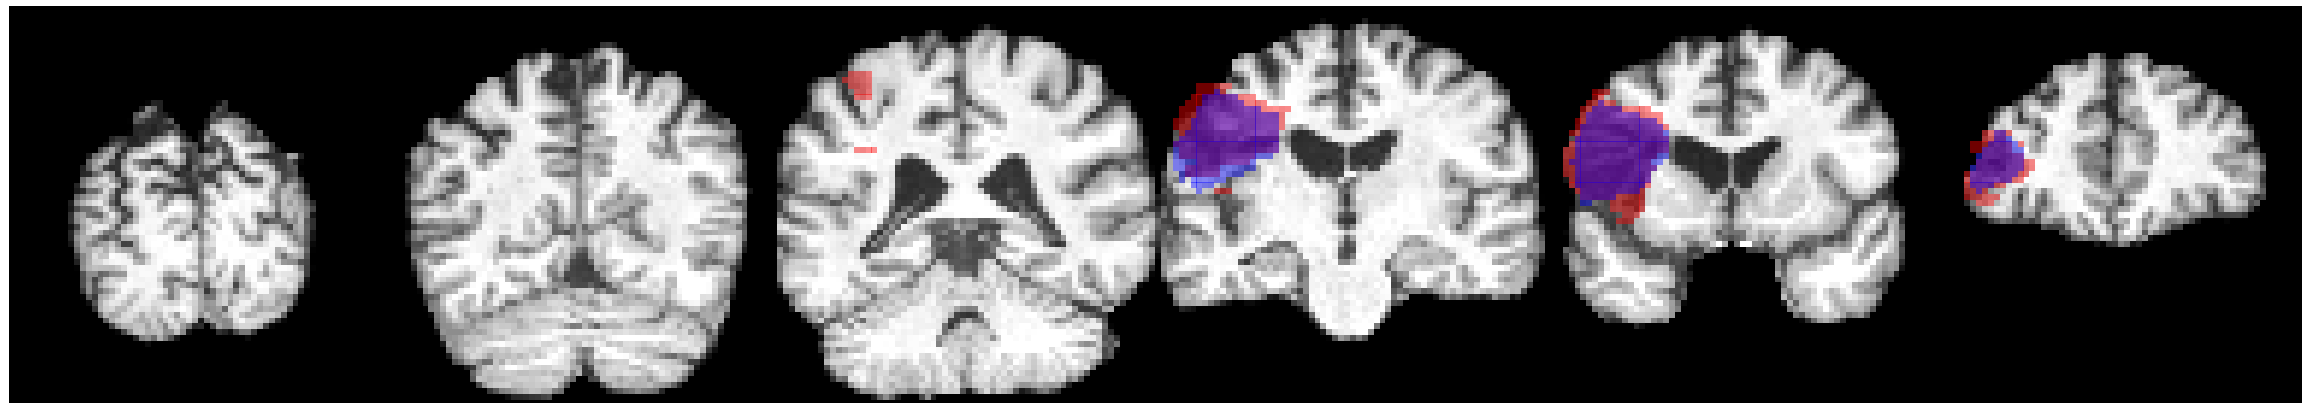

# Subject 27 – NJG

|                                          | Value   |
|------------------------------------------|---------|
| Lesion Volume (ml)                       | 159.864 |
| Dice Coefficient                         | 0.805   |
| Jaccard Coefficient                      | 0.674   |
| Hausdorff Distance (mm)                  | 14      |
| Average Displacement (mm)                | 3.619   |
| Sensitivity (Recall, true positive rate) | 0.792   |
| Specificity (true negative rate)         | 0.996   |

Normalized T1

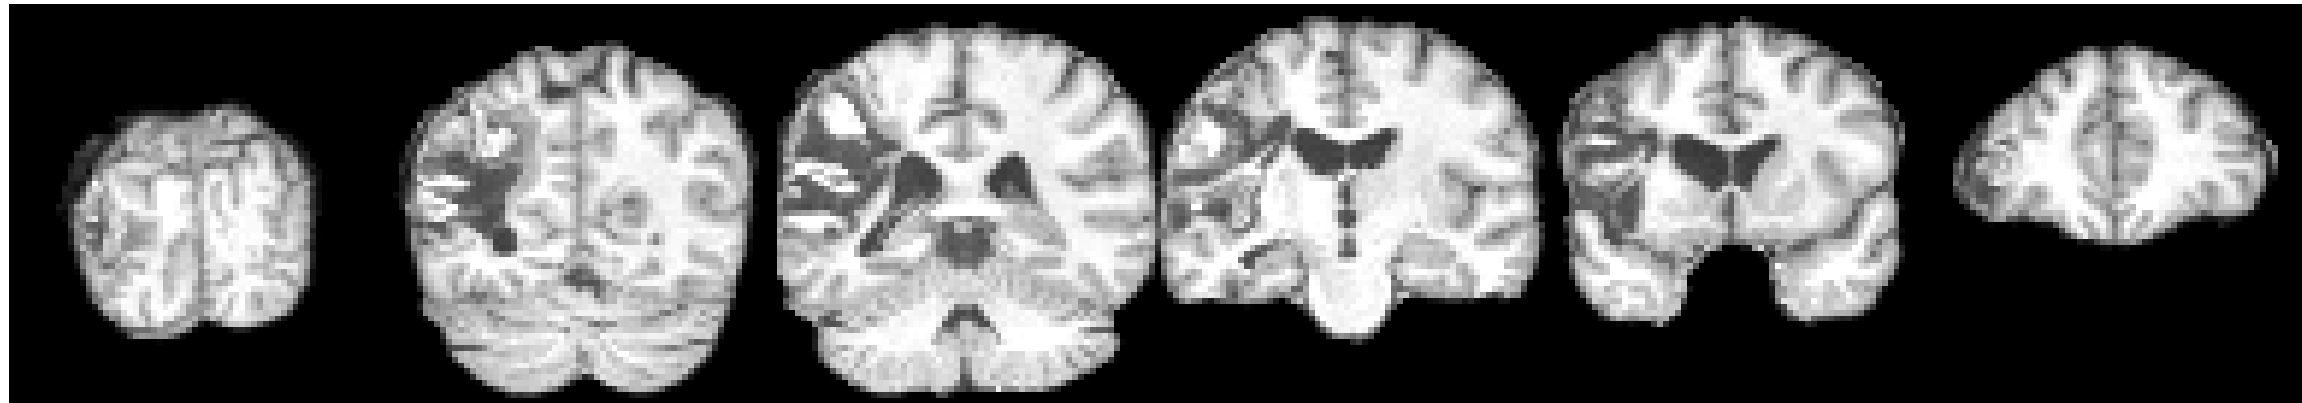

Lesion Overlay

red = Manual Tracing  
blue = LINDA prediction

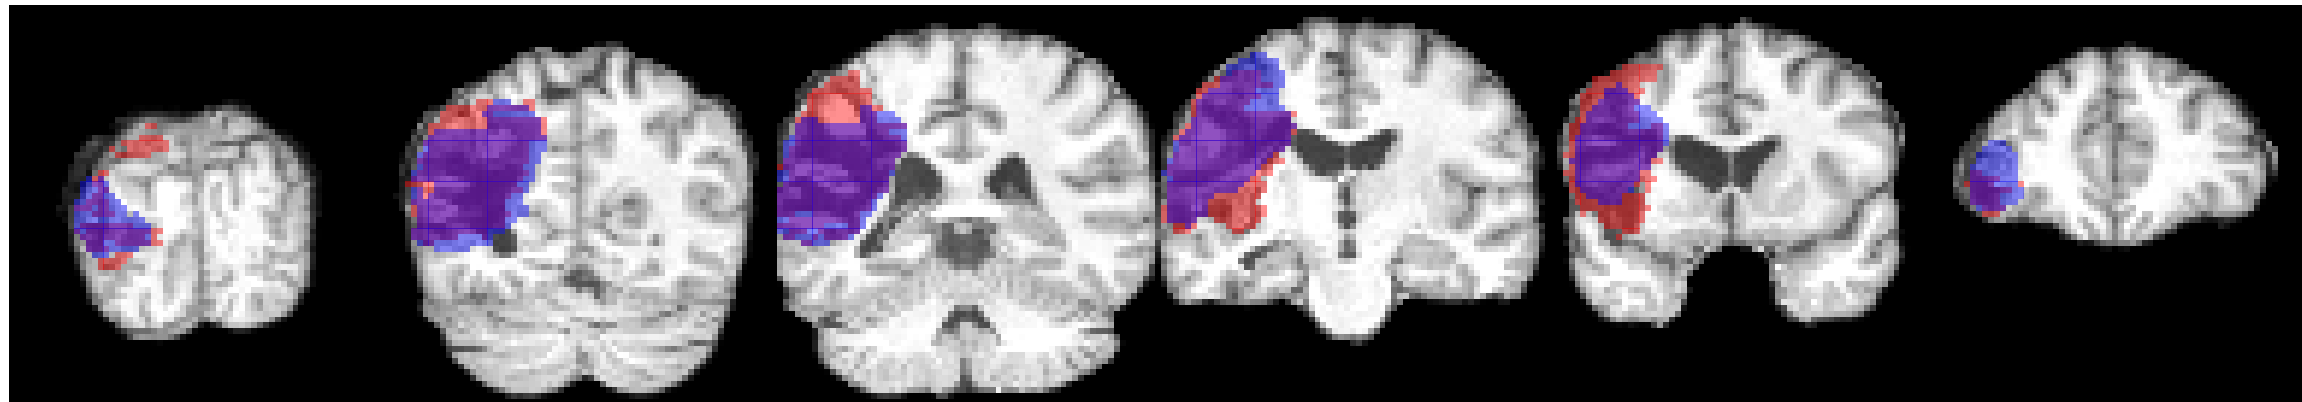

# Subject 28 – NQL

|                                          | Value  |
|------------------------------------------|--------|
| Lesion Volume (ml)                       | 71.256 |
| Dice Coefficient                         | 0.754  |
| Jaccard Coefficient                      | 0.606  |
| Hausdorff Distance (mm)                  | 27.928 |
| Average Displacement (mm)                | 1.563  |
| Sensitivity (Recall, true positive rate) | 0.72   |
| Specificity (true negative rate)         | 0.998  |

Normalized T1

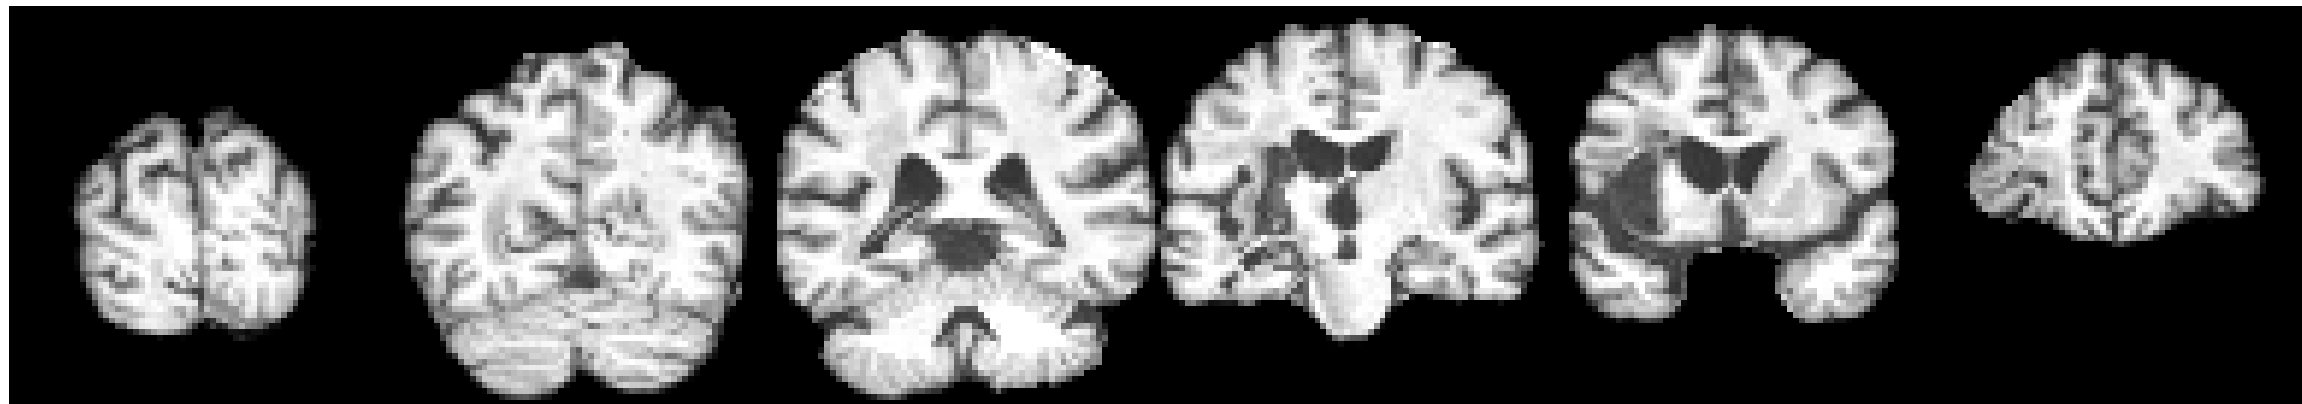

Lesion Overlay

red = Manual Tracing  
blue = LINDA prediction

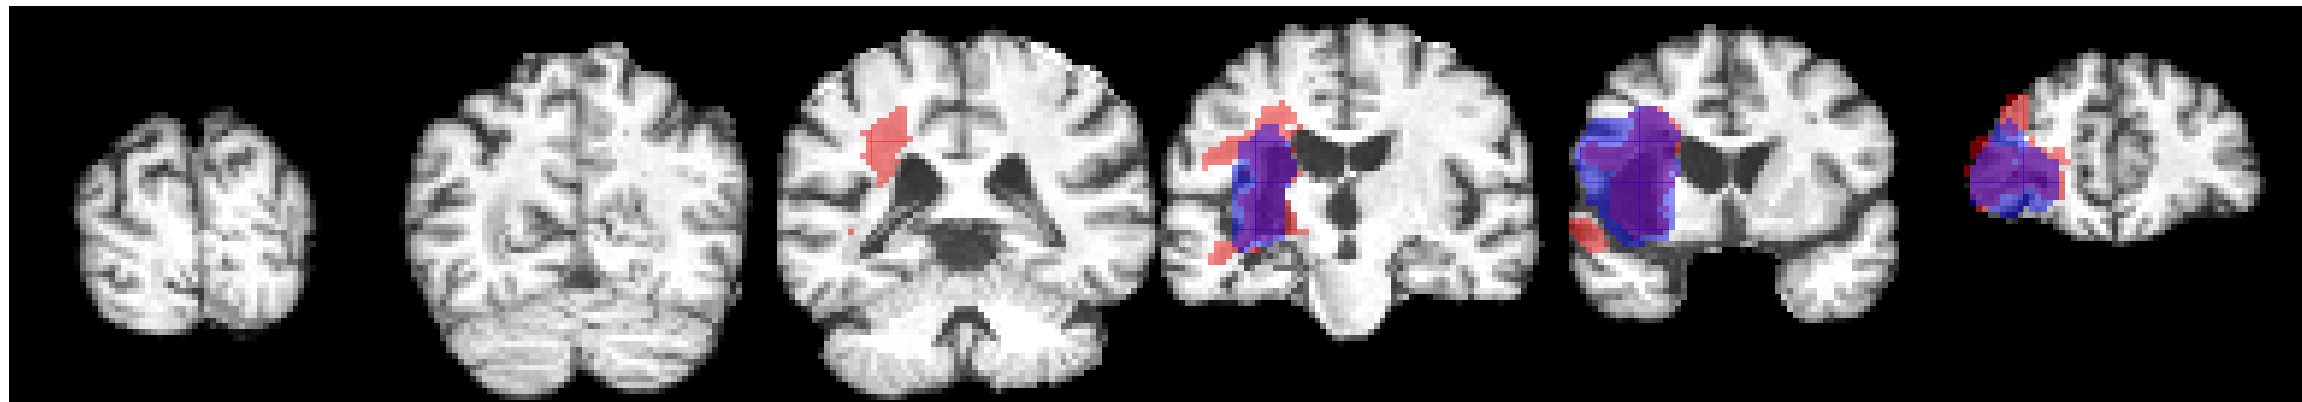

# Subject 29 – OBA

|                                          | Value  |
|------------------------------------------|--------|
| Lesion Volume (ml)                       | 108.08 |
| Dice Coefficient                         | 0.841  |
| Jaccard Coefficient                      | 0.726  |
| Hausdorff Distance (mm)                  | 24.083 |
| Average Displacement (mm)                | 1.833  |
| Sensitivity (Recall, true positive rate) | 0.789  |
| Specificity (true negative rate)         | 0.999  |

Normalized T1

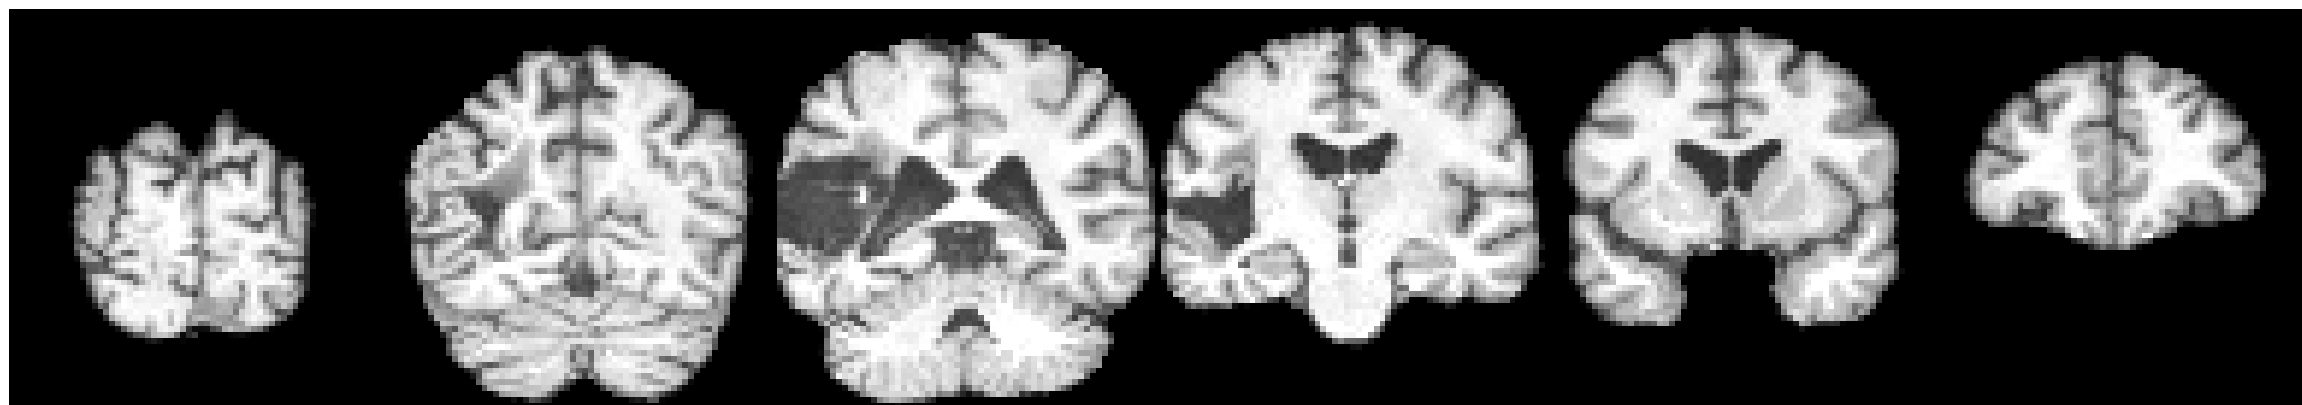

Lesion Overlay

red = Manual Tracing  
blue = LINDA prediction

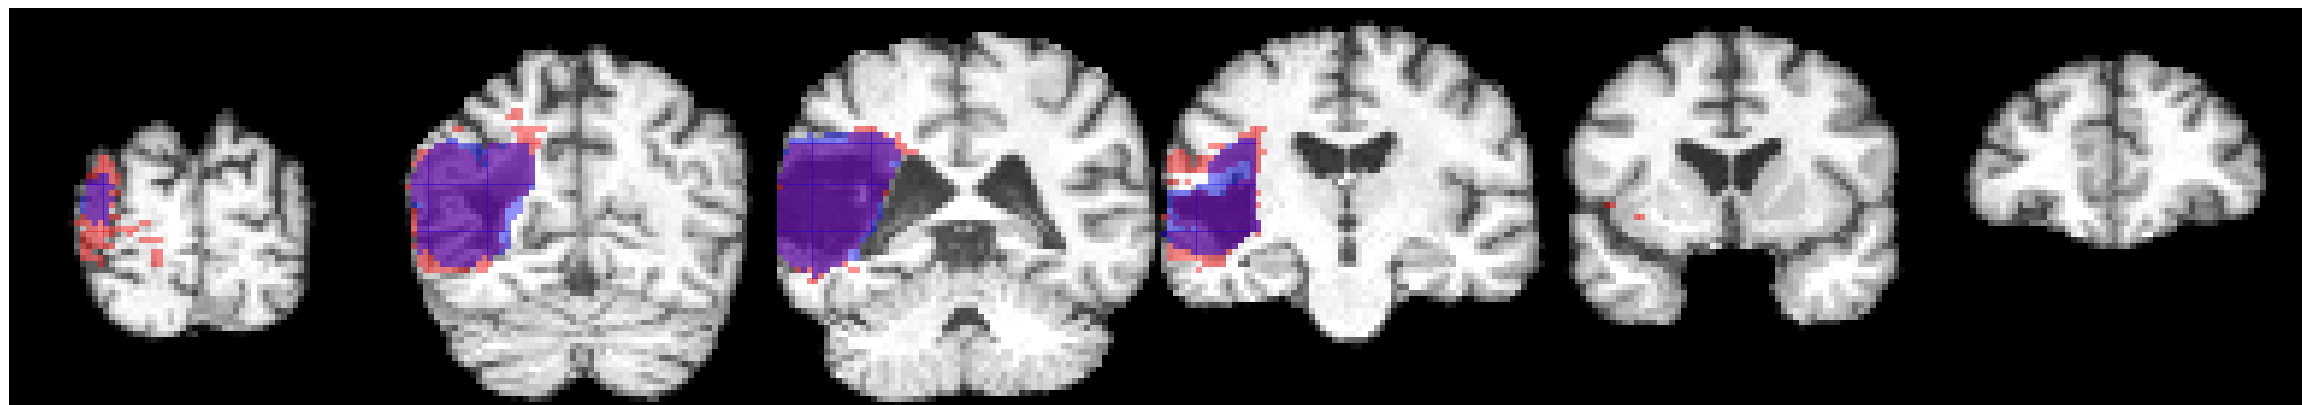

# Subject 30 – ODH

|                                          | Value  |
|------------------------------------------|--------|
| Lesion Volume (ml)                       | 35.416 |
| Dice Coefficient                         | 0.765  |
| Jaccard Coefficient                      | 0.619  |
| Hausdorff Distance (mm)                  | 42.095 |
| Average Displacement (mm)                | 2.201  |
| Sensitivity (Recall, true positive rate) | 0.852  |
| Specificity (true negative rate)         | 0.998  |

Normalized T1

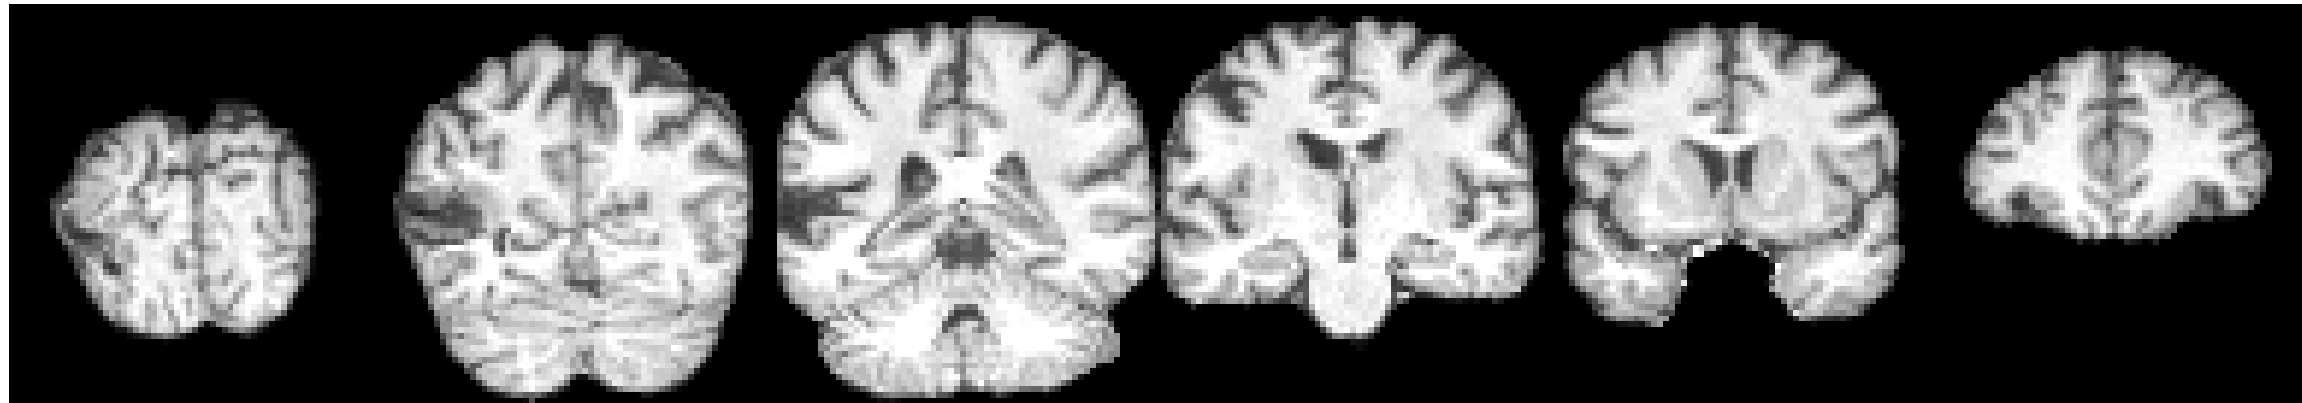

Lesion Overlay

red = Manual Tracing  
blue = LINDA prediction

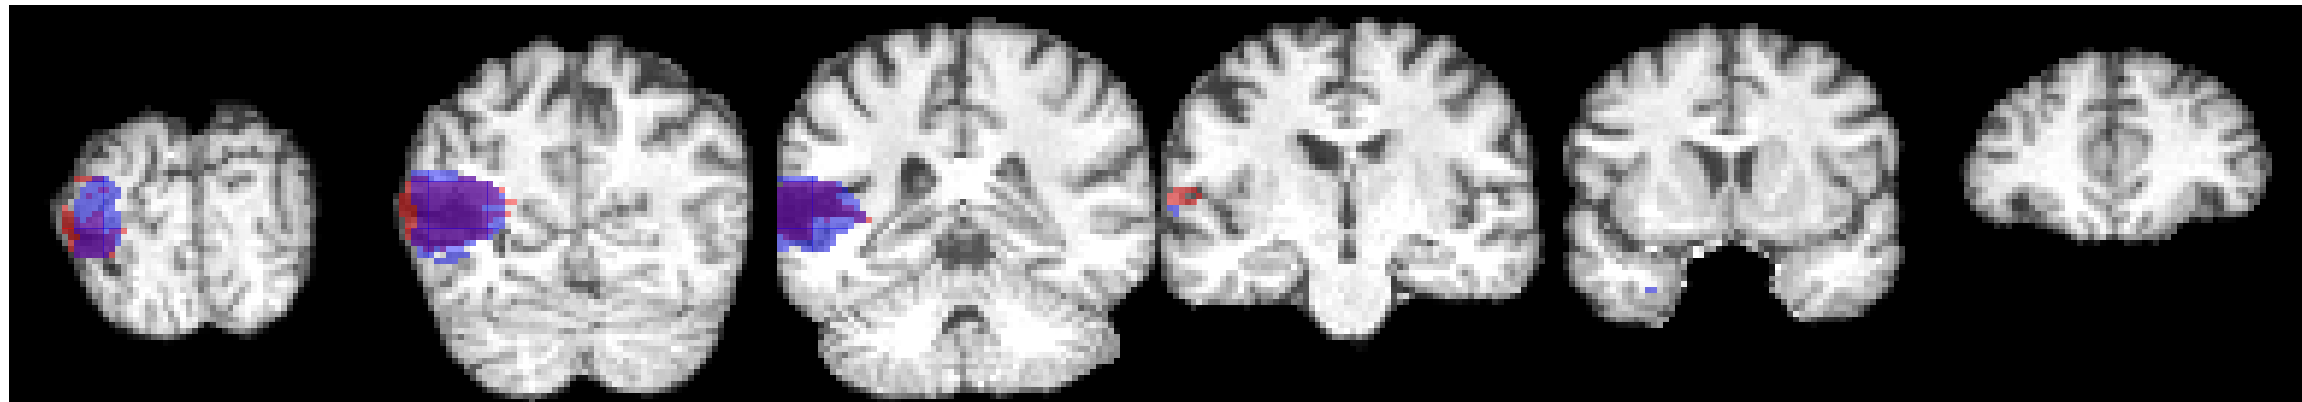

# Subject 31 – PRO

|                                          | Value  |
|------------------------------------------|--------|
| Lesion Volume (ml)                       | 290.64 |
| Dice Coefficient                         | 0.837  |
| Jaccard Coefficient                      | 0.72   |
| Hausdorff Distance (mm)                  | 18.868 |
| Average Displacement (mm)                | 1.548  |
| Sensitivity (Recall, true positive rate) | 0.774  |
| Specificity (true negative rate)         | 0.997  |

Normalized T1

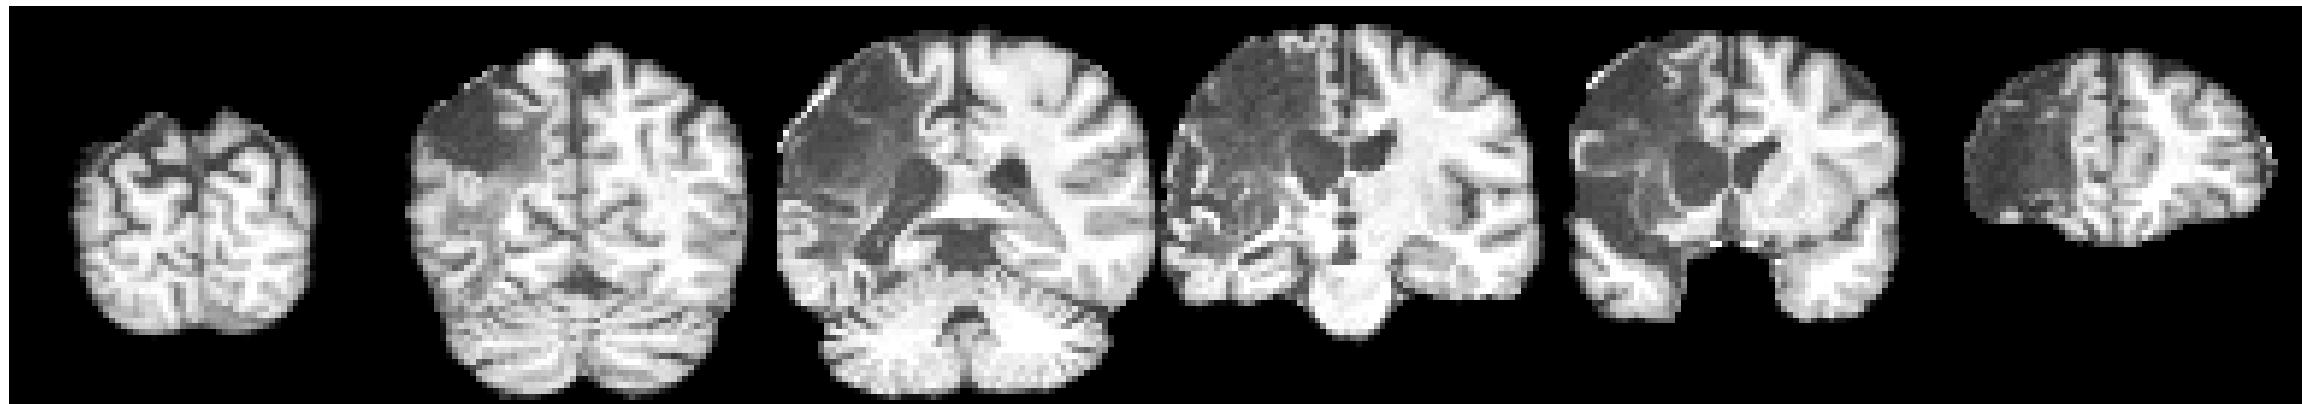

Lesion Overlay

red = Manual Tracing  
blue = LINDA prediction

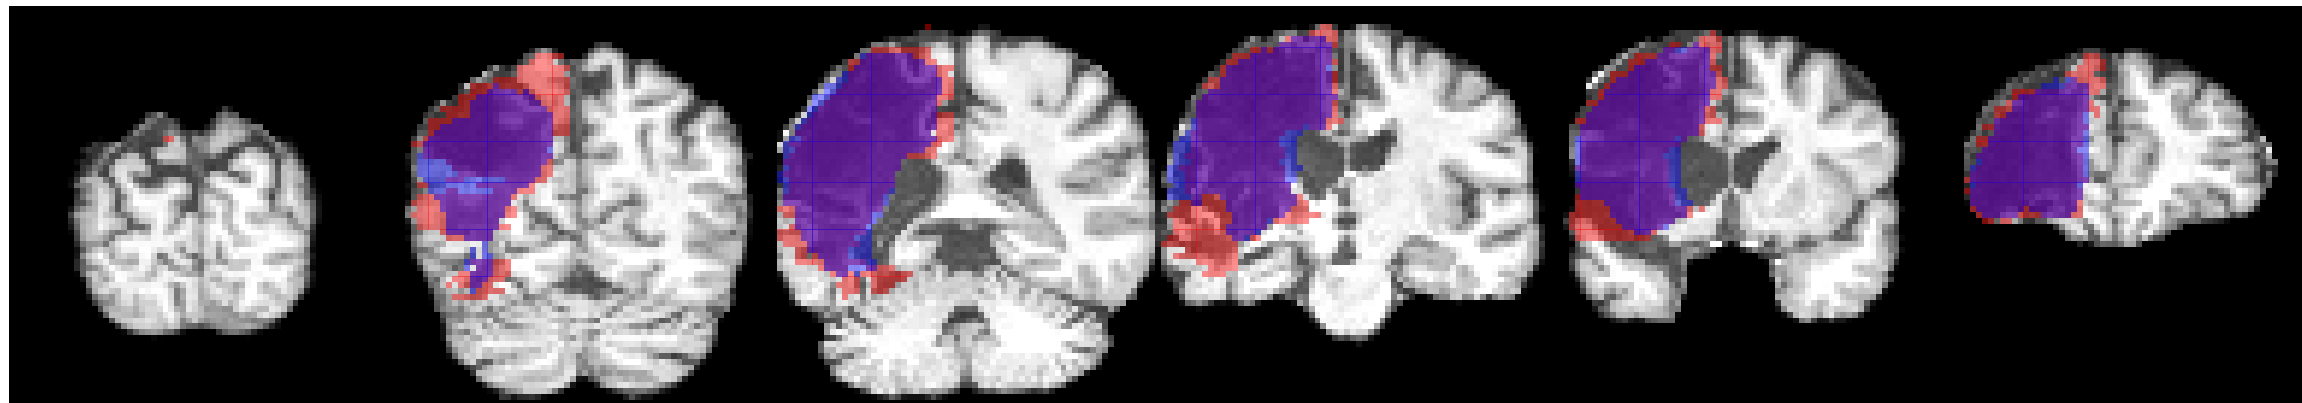

# Subject 32 – PSN

|                                          | Value  |
|------------------------------------------|--------|
| Lesion Volume (ml)                       | 10.88  |
| Dice Coefficient                         | 0.554  |
| Jaccard Coefficient                      | 0.383  |
| Hausdorff Distance (mm)                  | 27.857 |
| Average Displacement (mm)                | 2.243  |
| Sensitivity (Recall, true positive rate) | 0.69   |
| Specificity (true negative rate)         | 0.999  |

Normalized T1

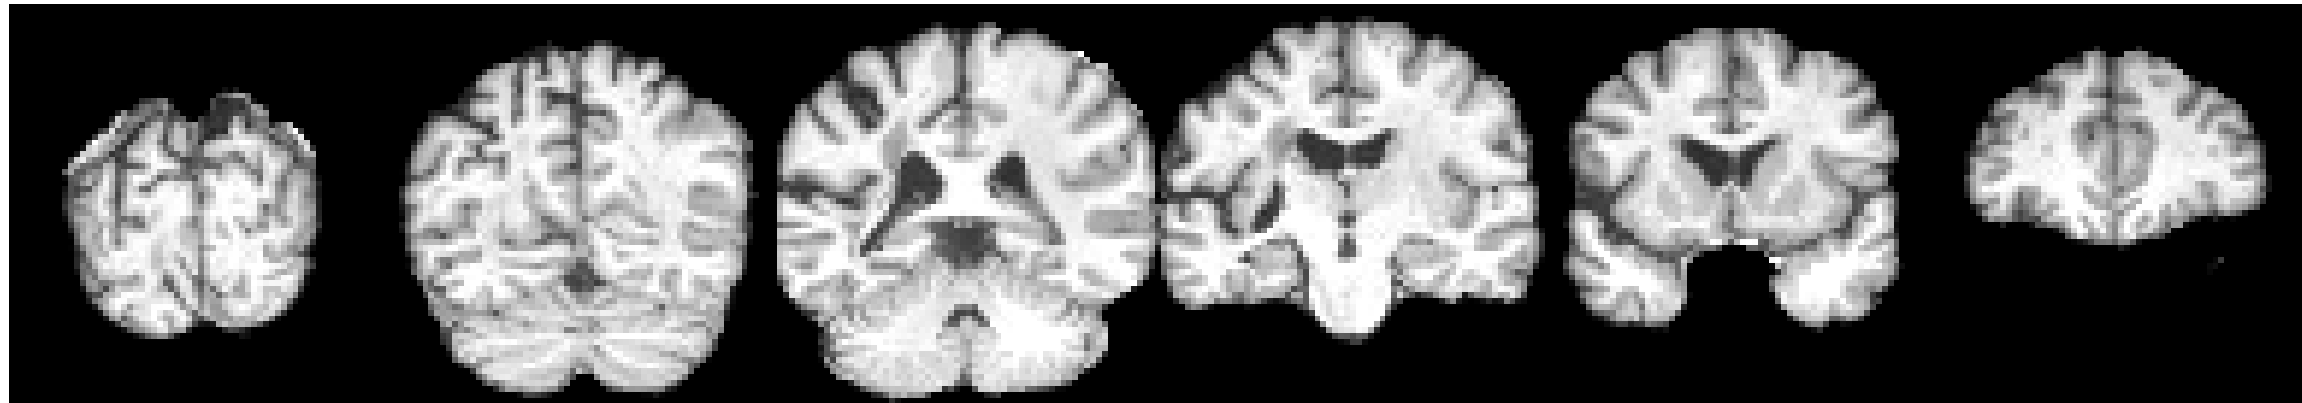

Lesion Overlay

red = Manual Tracing  
blue = LINDA prediction

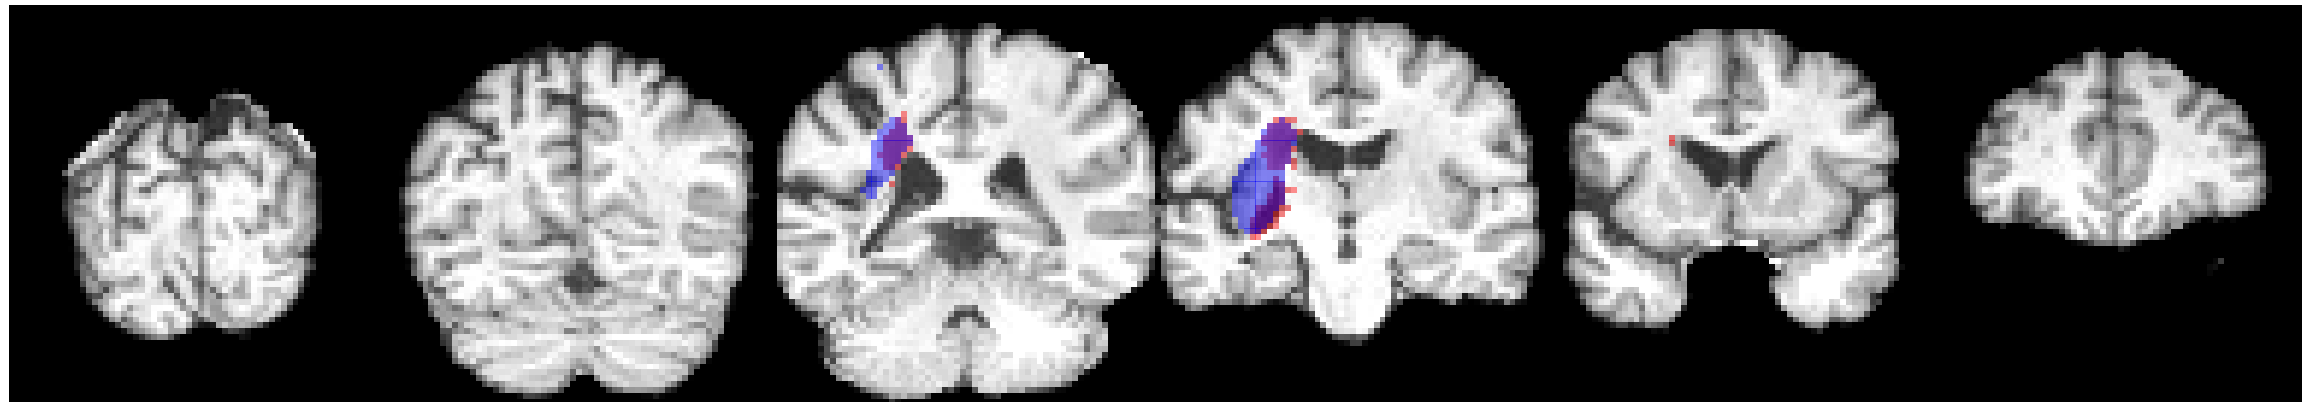



# Subject 33 – PTI

|                                          | Value  |
|------------------------------------------|--------|
| Lesion Volume (ml)                       | 77.784 |
| Dice Coefficient                         | 0.798  |
| Jaccard Coefficient                      | 0.664  |
| Hausdorff Distance (mm)                  | 22.978 |
| Average Displacement (mm)                | 2.729  |
| Sensitivity (Recall, true positive rate) | 0.738  |
| Specificity (true negative rate)         | 0.999  |

Normalized T1

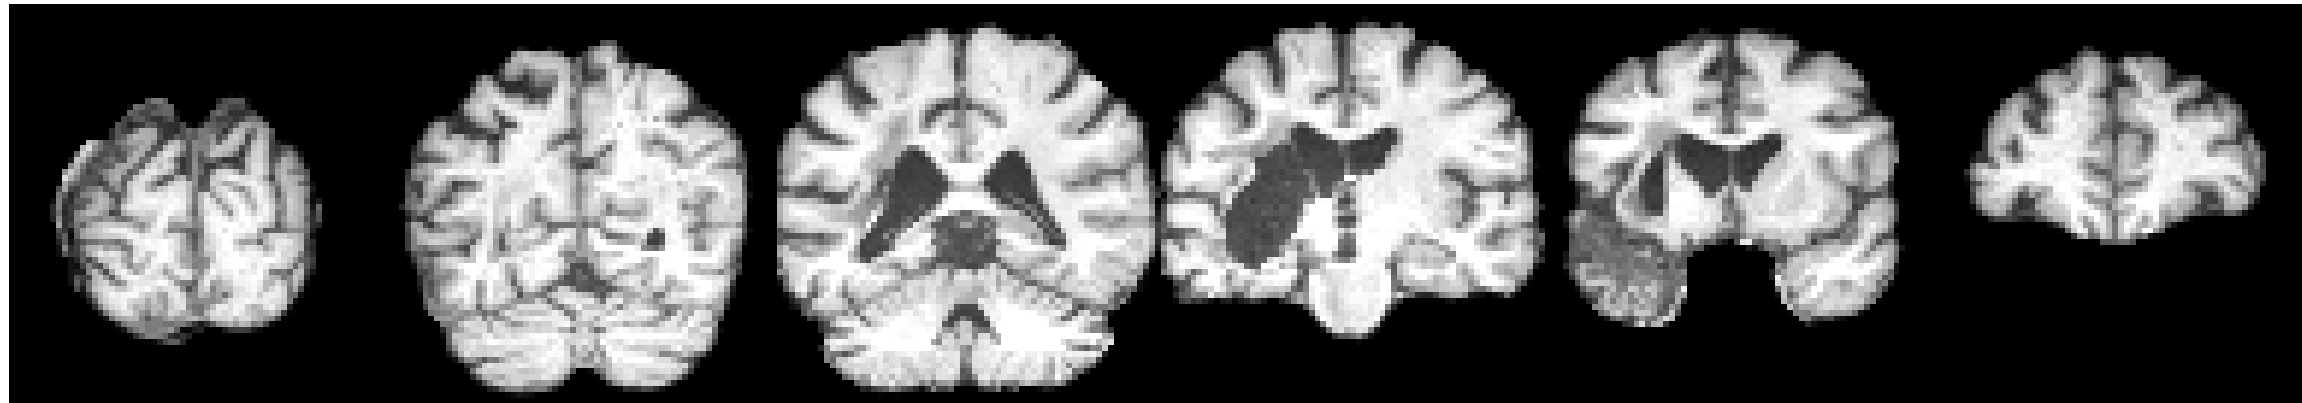

Lesion Overlay

red = Manual Tracing  
blue = LINDA prediction

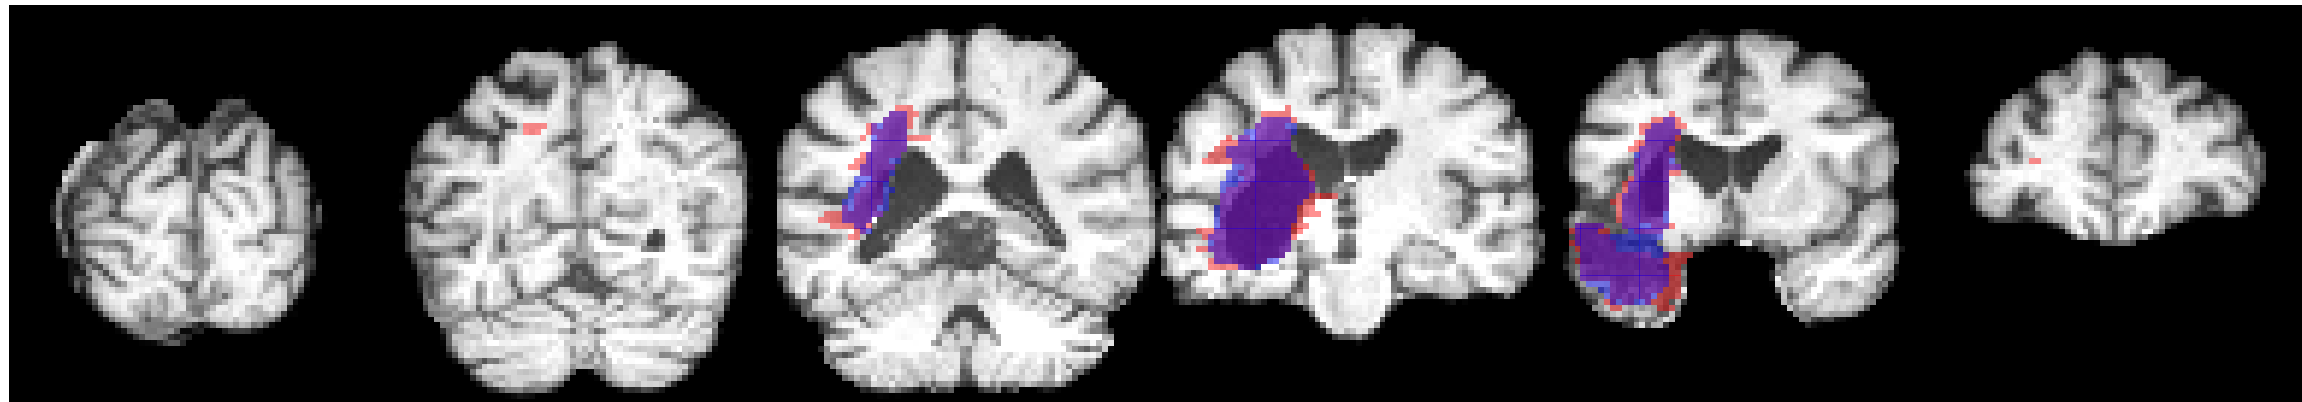

# Subject 34 – RDJ

|                                          | Value  |
|------------------------------------------|--------|
| Lesion Volume (ml)                       | 63.528 |
| Dice Coefficient                         | 0.641  |
| Jaccard Coefficient                      | 0.471  |
| Hausdorff Distance (mm)                  | 27.203 |
| Average Displacement (mm)                | 2.275  |
| Sensitivity (Recall, true positive rate) | 0.488  |
| Specificity (true negative rate)         | 1      |

Normalized T1

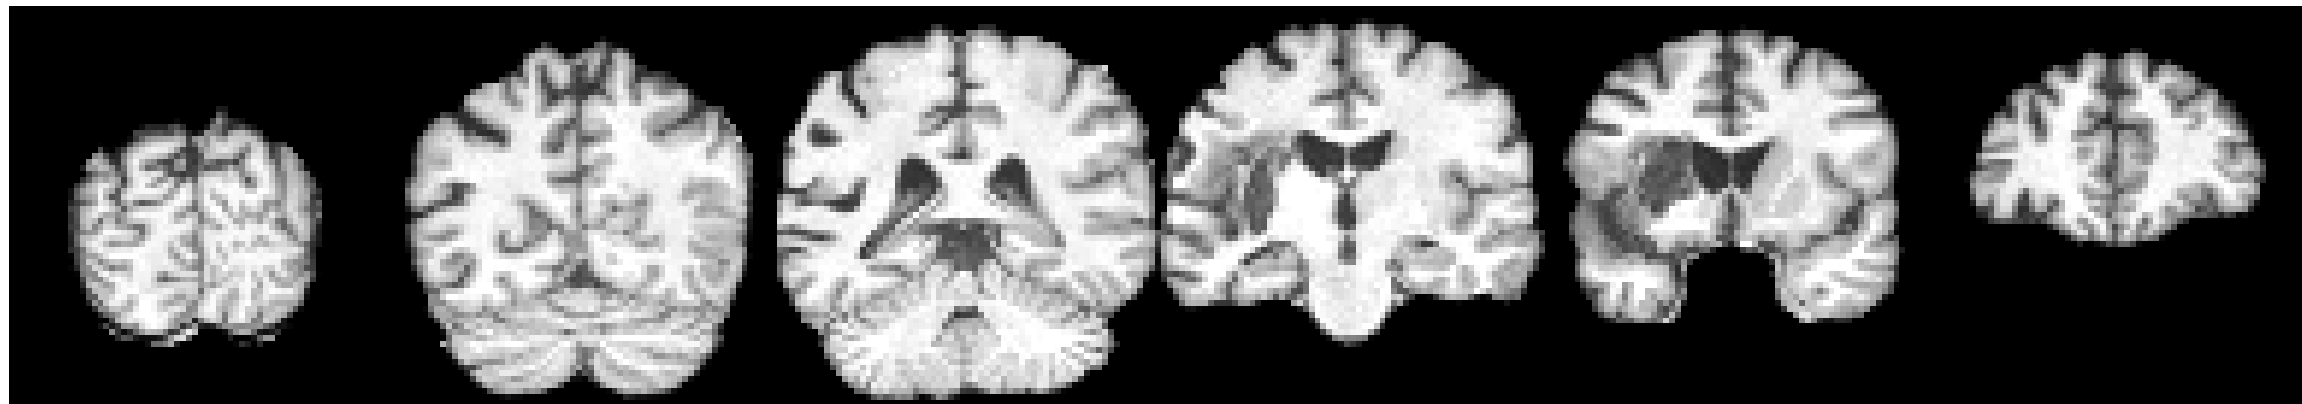

Lesion Overlay

red = Manual Tracing  
blue = LINDA prediction

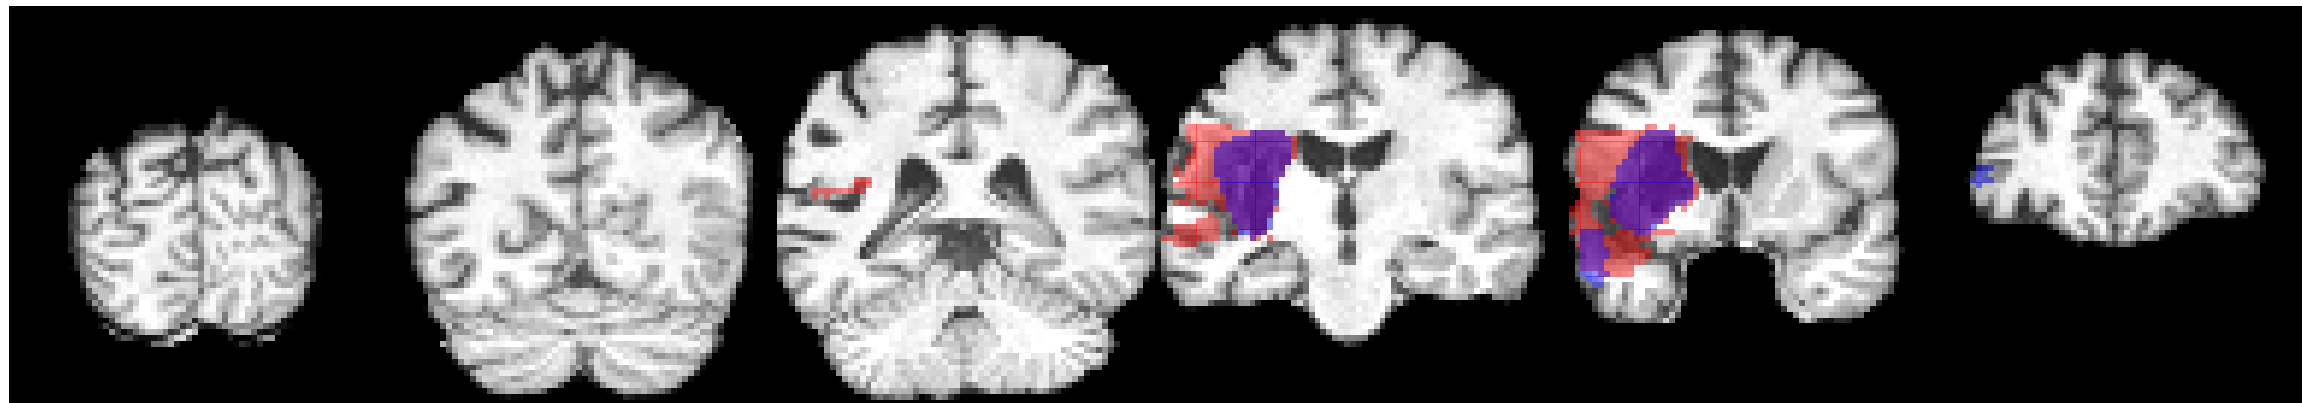

# Subject 35 – RGI

|                                          | Value  |
|------------------------------------------|--------|
| Lesion Volume (ml)                       | 11.136 |
| Dice Coefficient                         | 0.386  |
| Jaccard Coefficient                      | 0.24   |
| Hausdorff Distance (mm)                  | 39.9   |
| Average Displacement (mm)                | 1.513  |
| Sensitivity (Recall, true positive rate) | 0.485  |
| Specificity (true negative rate)         | 0.999  |

Normalized T1

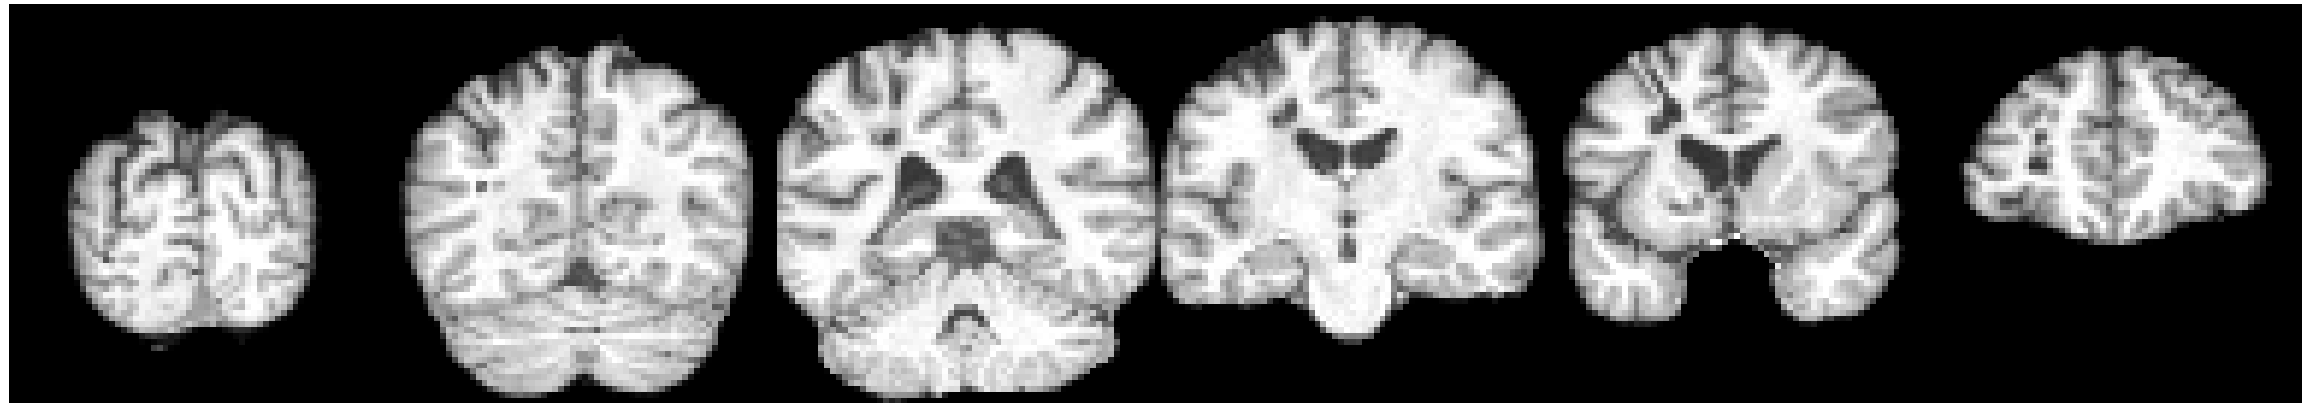

Lesion Overlay

red = Manual Tracing  
blue = LINDA prediction

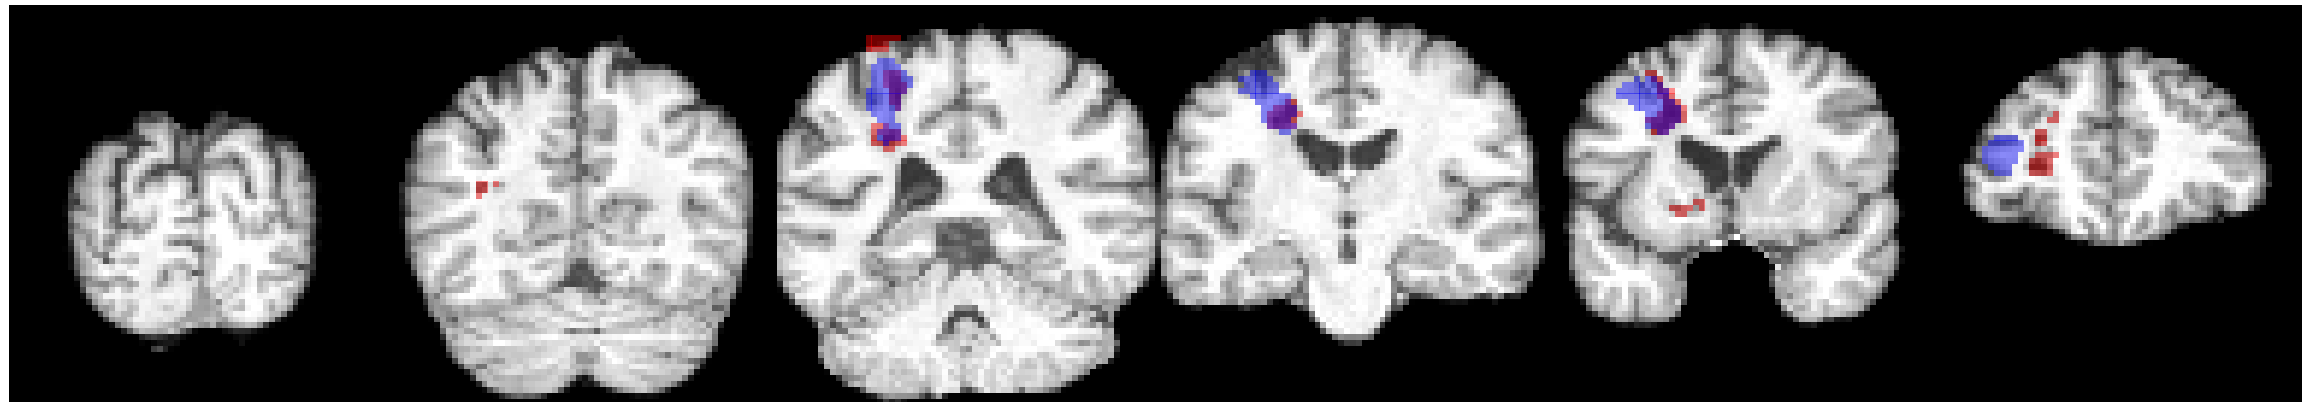

# Subject 36 – SHB

|                                          | Value  |
|------------------------------------------|--------|
| Lesion Volume (ml)                       | 16.064 |
| Dice Coefficient                         | 0.697  |
| Jaccard Coefficient                      | 0.535  |
| Hausdorff Distance (mm)                  | 28.071 |
| Average Displacement (mm)                | 2.762  |
| Sensitivity (Recall, true positive rate) | 0.669  |
| Specificity (true negative rate)         | 0.999  |

Normalized T1

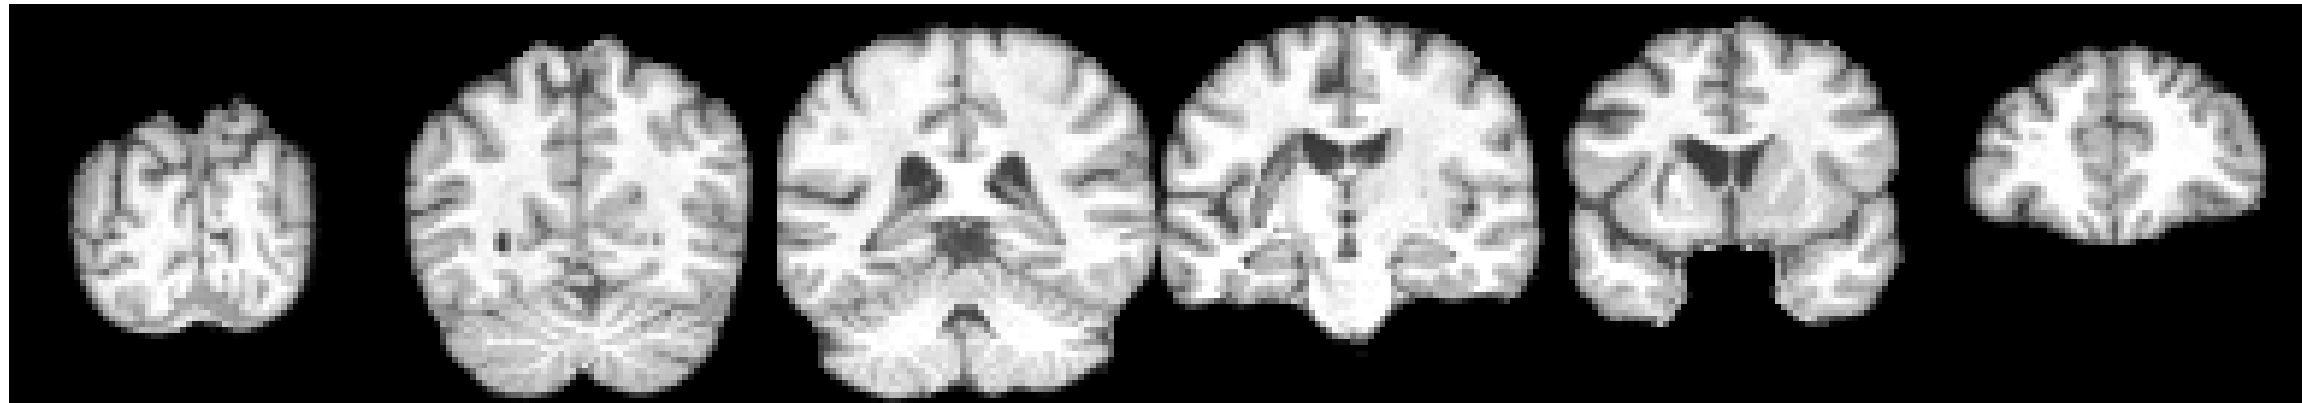

Lesion Overlay

red = Manual Tracing  
blue = LINDA prediction

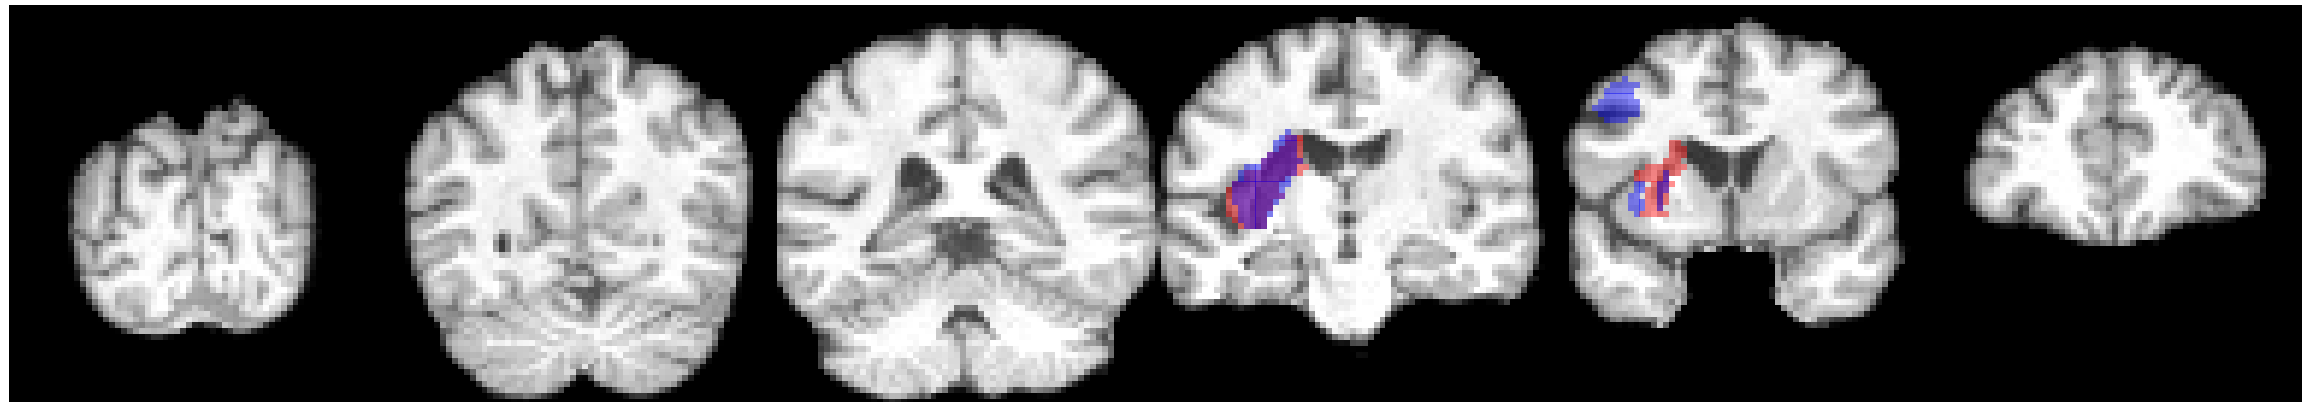

# Subject 37 – SLO

|                                          | Value   |
|------------------------------------------|---------|
| Lesion Volume (ml)                       | 100.488 |
| Dice Coefficient                         | 0.744   |
| Jaccard Coefficient                      | 0.593   |
| Hausdorff Distance (mm)                  | 35.384  |
| Average Displacement (mm)                | 1.932   |
| Sensitivity (Recall, true positive rate) | 0.749   |
| Specificity (true negative rate)         | 0.997   |

Normalized T1

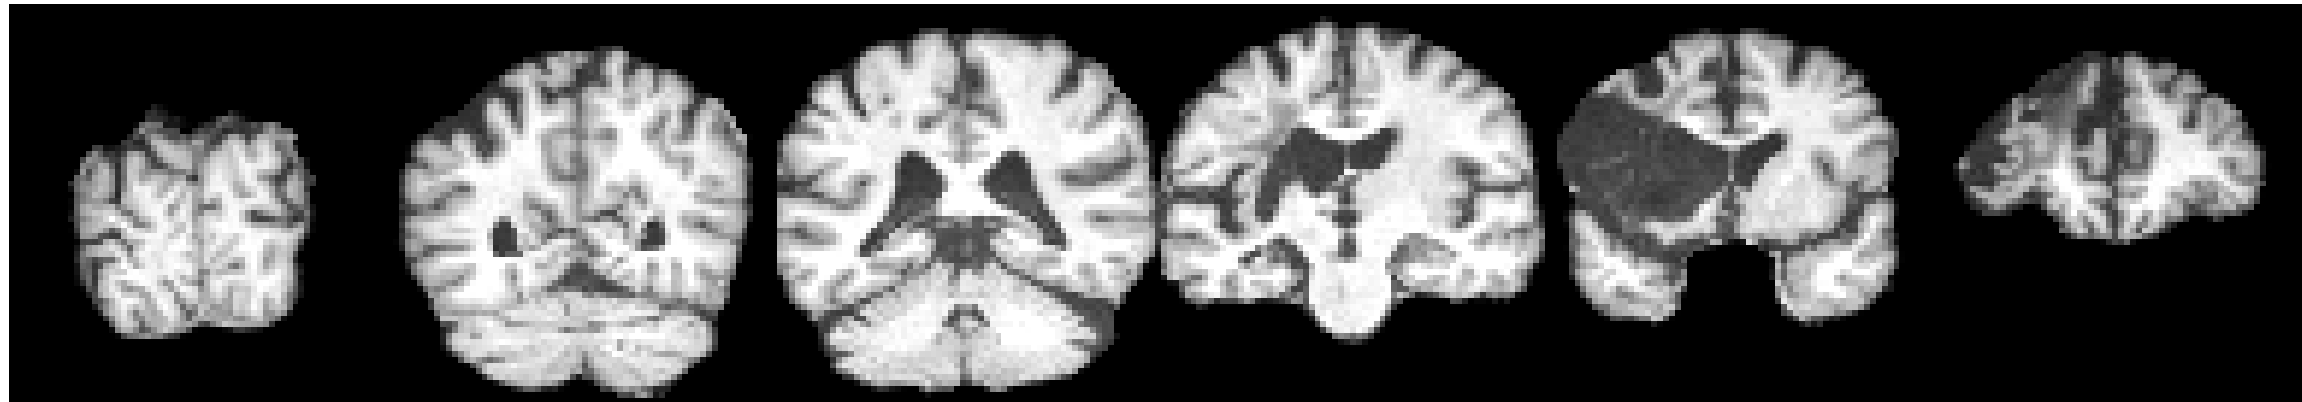

Lesion Overlay

red = Manual Tracing  
blue = LINDA prediction

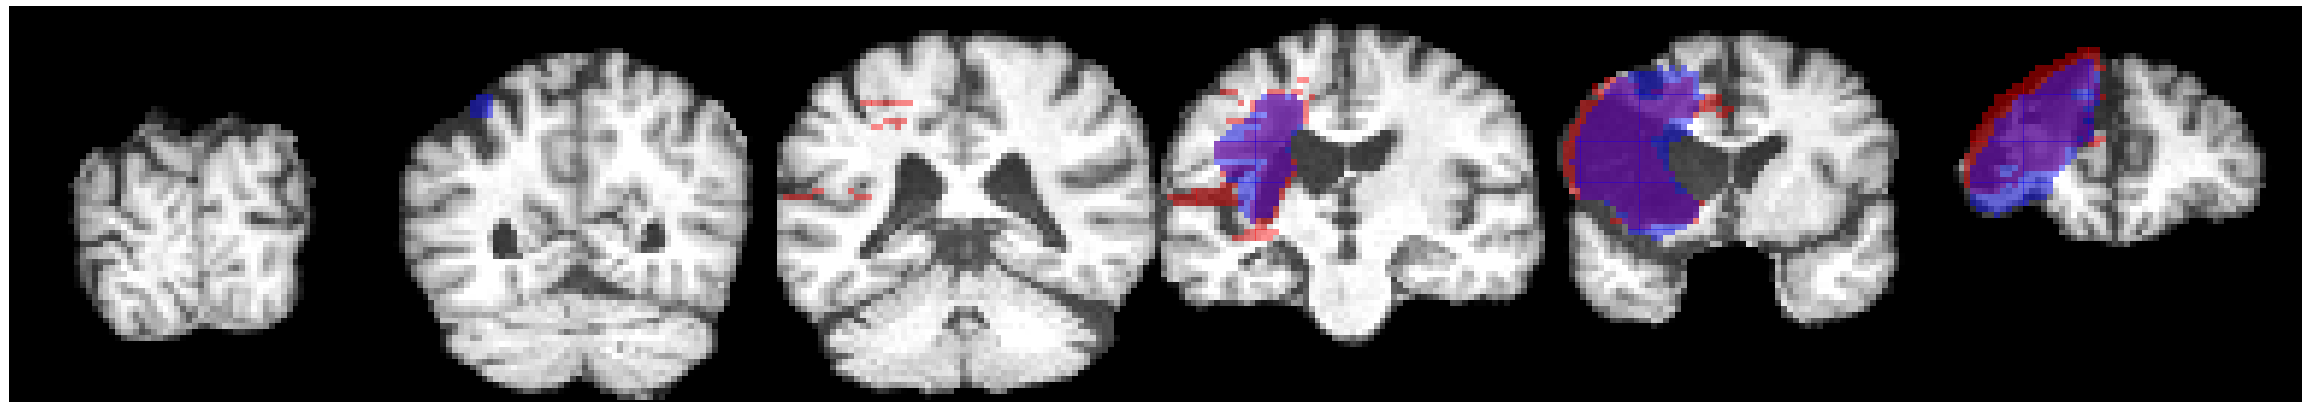

# Subject 38 – STP

|                                          | Value   |
|------------------------------------------|---------|
| Lesion Volume (ml)                       | 199.112 |
| Dice Coefficient                         | 0.755   |
| Jaccard Coefficient                      | 0.607   |
| Hausdorff Distance (mm)                  | 23.152  |
| Average Displacement (mm)                | 1.83    |
| Sensitivity (Recall, true positive rate) | 0.629   |
| Specificity (true negative rate)         | 0.999   |

Normalized T1

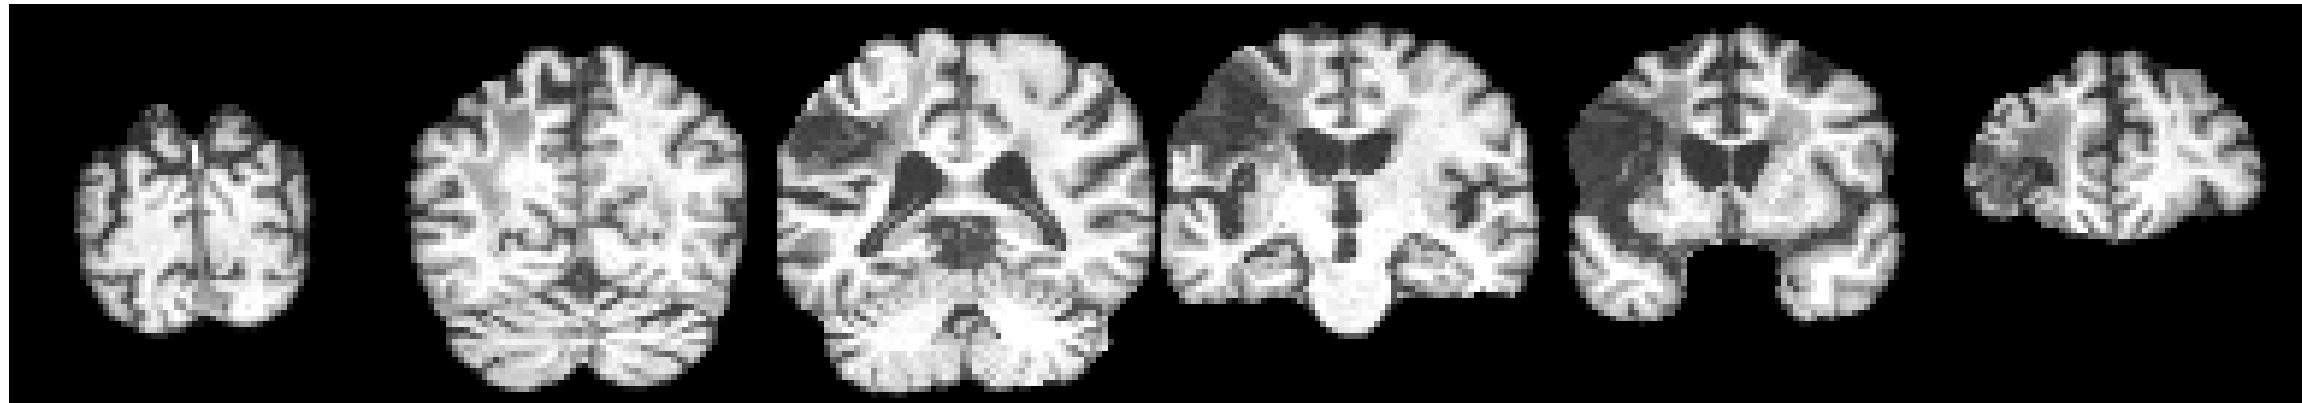

Lesion Overlay

red = Manual Tracing  
blue = LINDA prediction

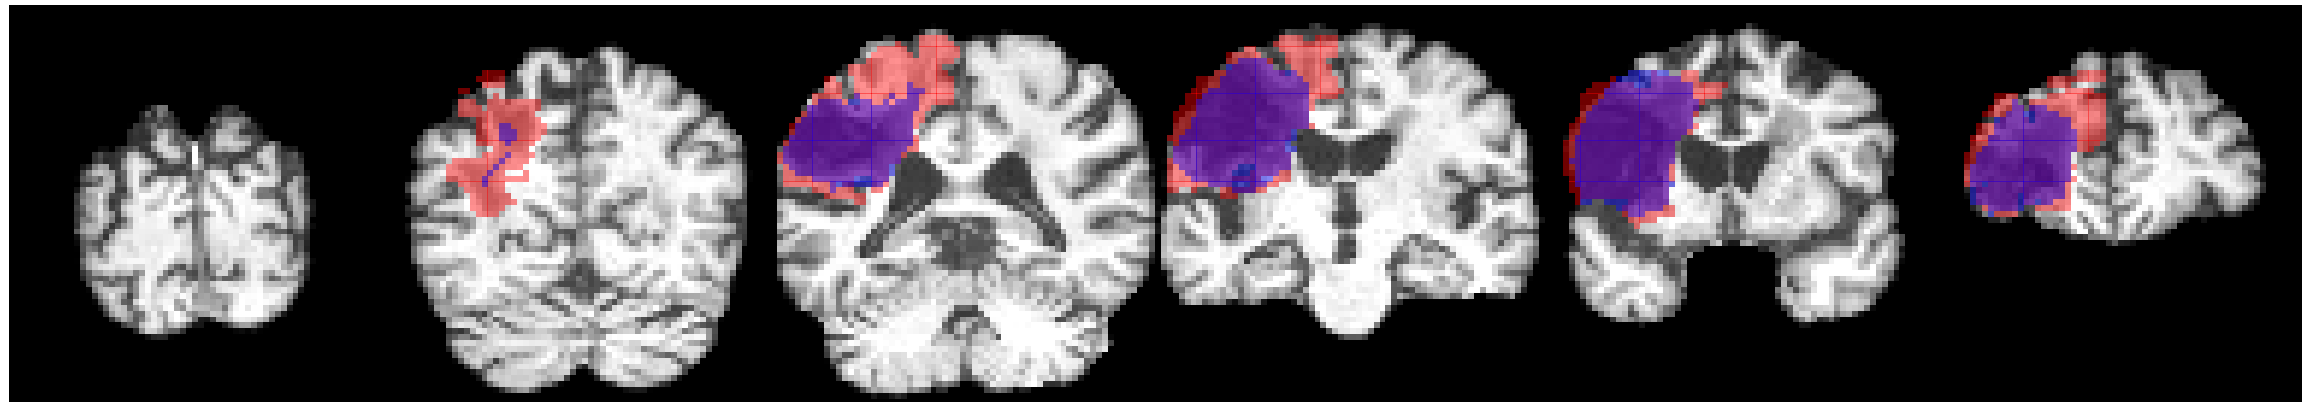

# Subject 39 – SWD

|                                          | Value  |
|------------------------------------------|--------|
| Lesion Volume (ml)                       | 37.52  |
| Dice Coefficient                         | 0.547  |
| Jaccard Coefficient                      | 0.376  |
| Hausdorff Distance (mm)                  | 36.332 |
| Average Displacement (mm)                | 4.818  |
| Sensitivity (Recall, true positive rate) | 0.424  |
| Specificity (true negative rate)         | 0.999  |

Normalized T1

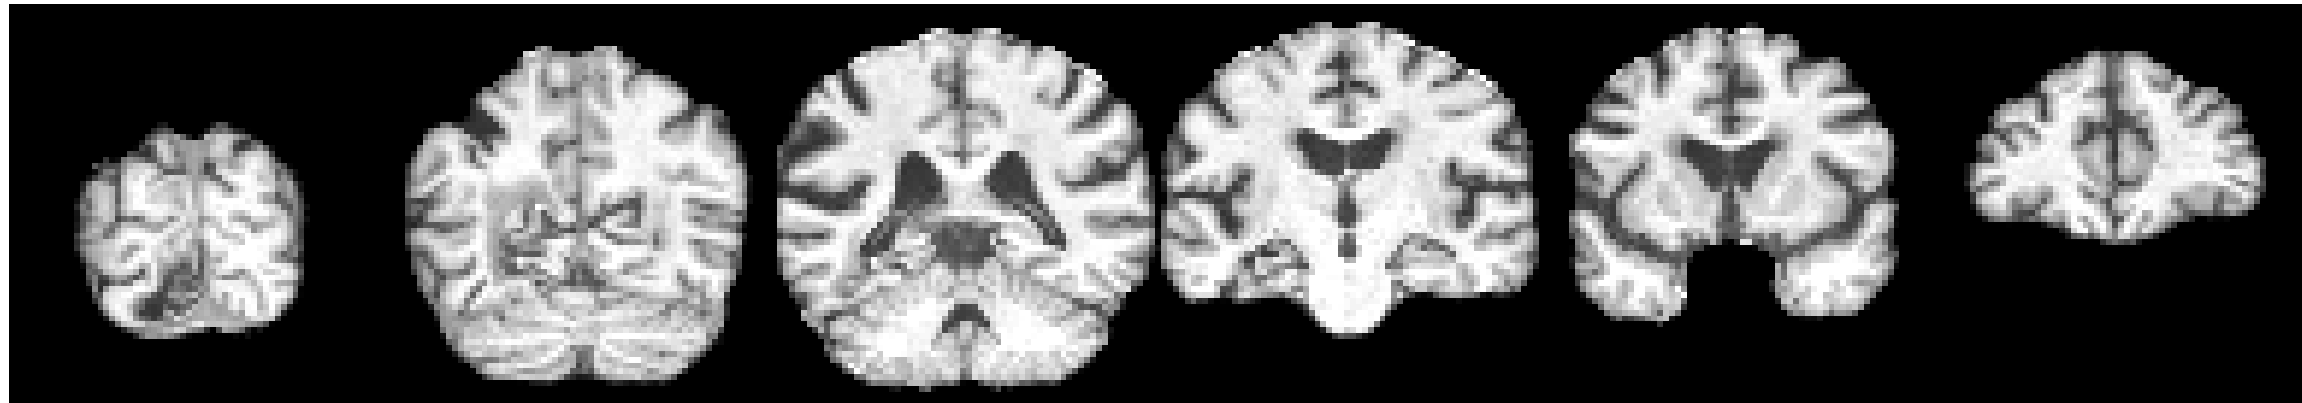

Lesion Overlay

red = Manual Tracing  
blue = LINDA prediction

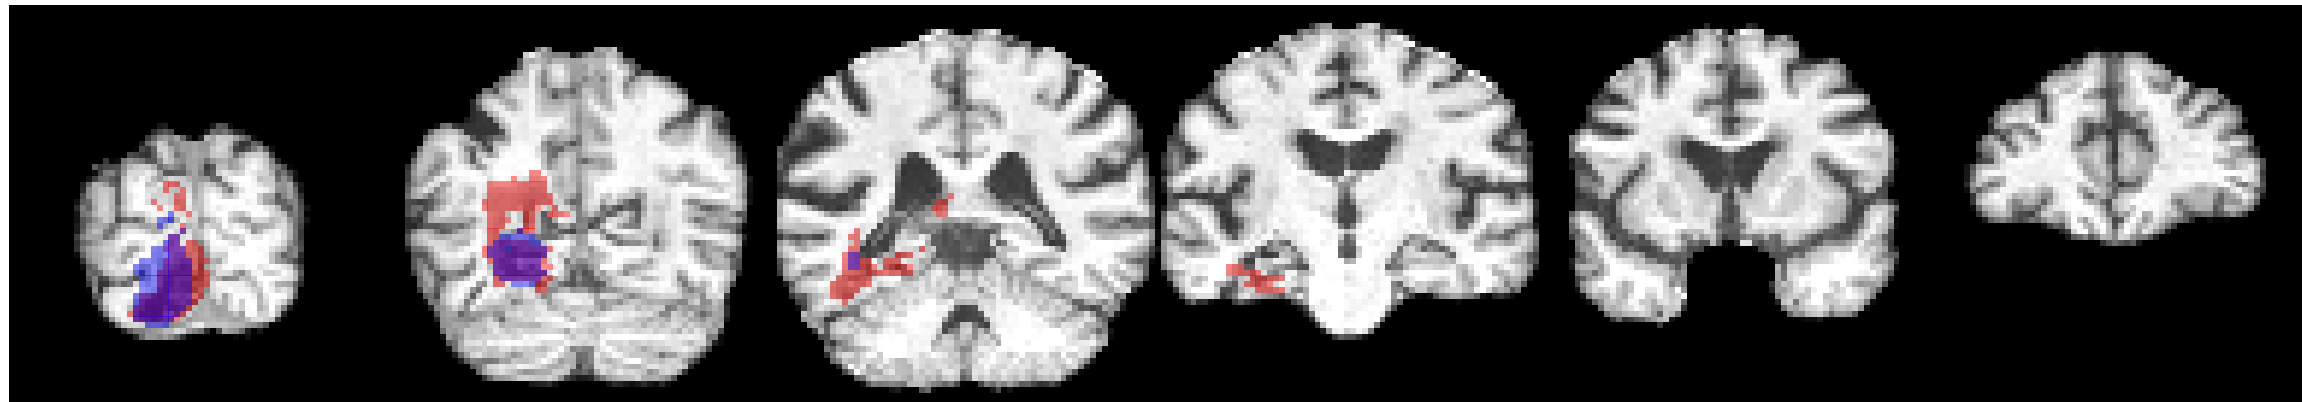

# Subject 40 – TUR

|                                          | Value  |
|------------------------------------------|--------|
| Lesion Volume (ml)                       | 7.896  |
| Dice Coefficient                         | 0.71   |
| Jaccard Coefficient                      | 0.551  |
| Hausdorff Distance (mm)                  | 11.662 |
| Average Displacement (mm)                | 1.784  |
| Sensitivity (Recall, true positive rate) | 0.597  |
| Specificity (true negative rate)         | 1      |

Normalized T1

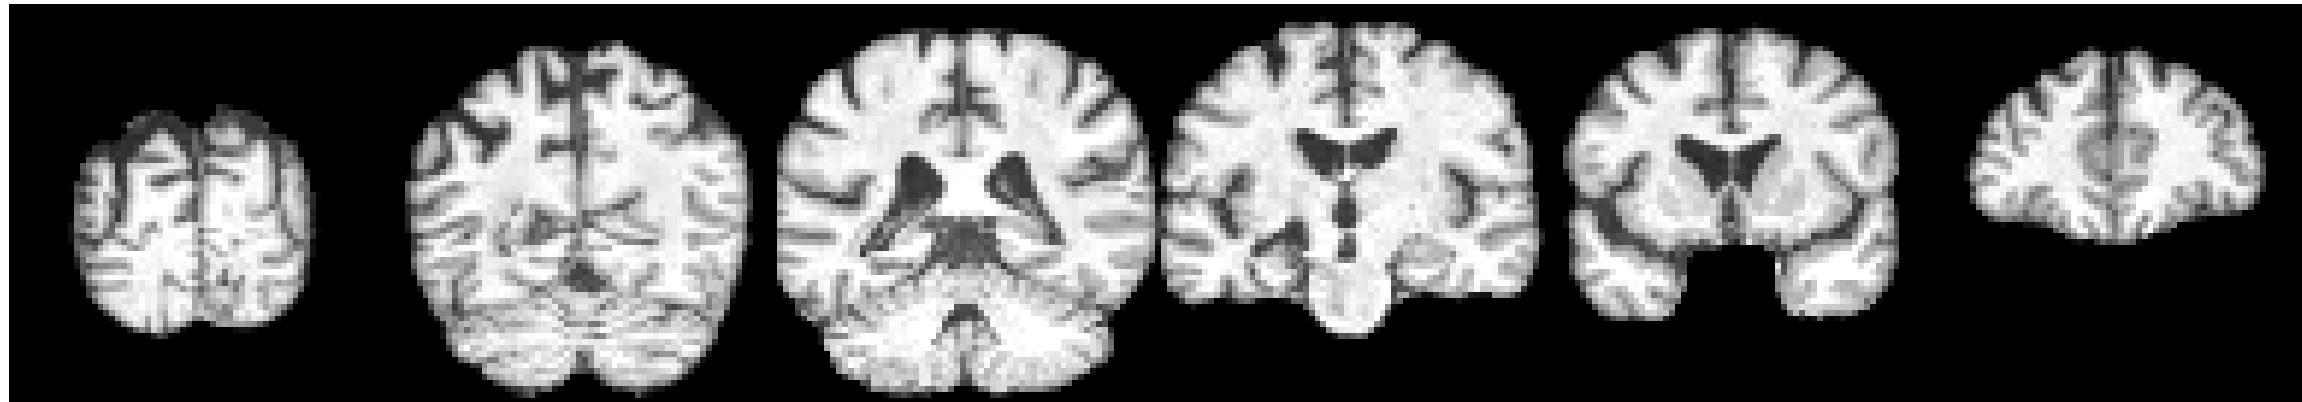

Lesion Overlay

red = Manual Tracing  
blue = LINDA prediction

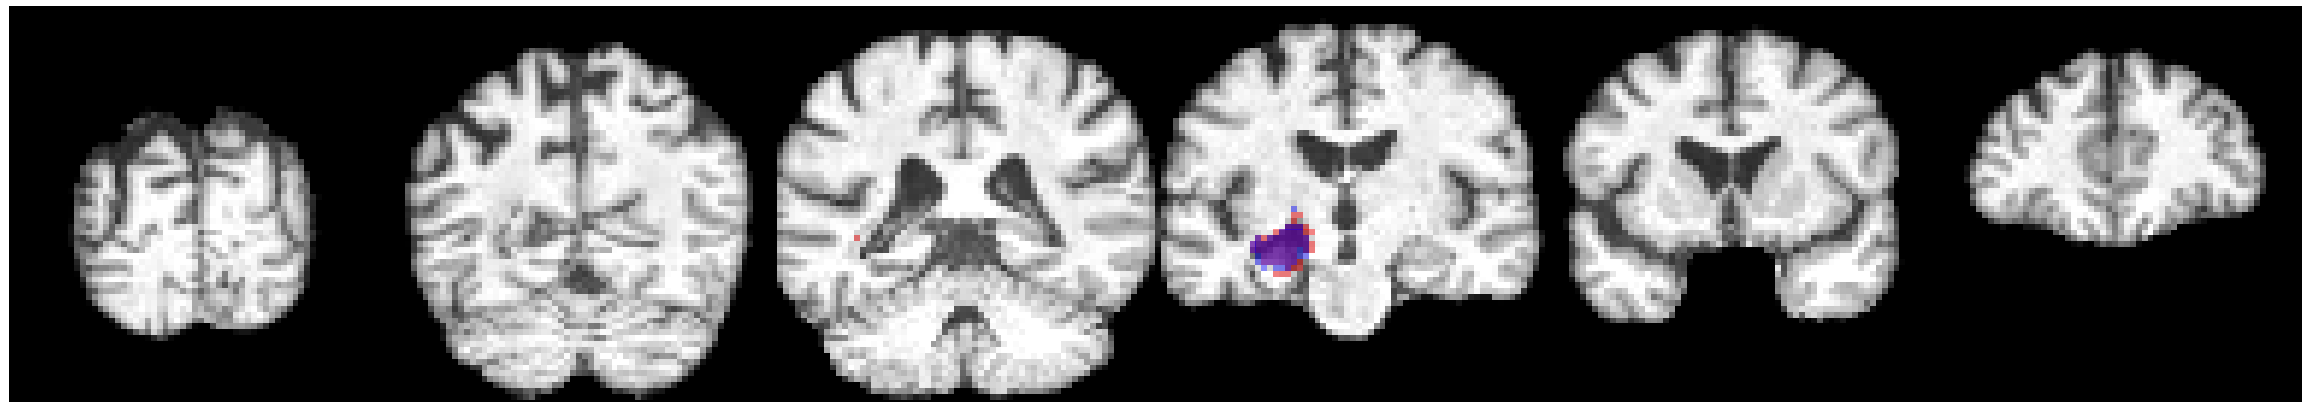



# Subject 41 – VMX

|                                          | Value  |
|------------------------------------------|--------|
| Lesion Volume (ml)                       | 53.072 |
| Dice Coefficient                         | 0.663  |
| Jaccard Coefficient                      | 0.495  |
| Hausdorff Distance (mm)                  | 25.06  |
| Average Displacement (mm)                | 2.278  |
| Sensitivity (Recall, true positive rate) | 0.634  |
| Specificity (true negative rate)         | 0.998  |

Normalized T1

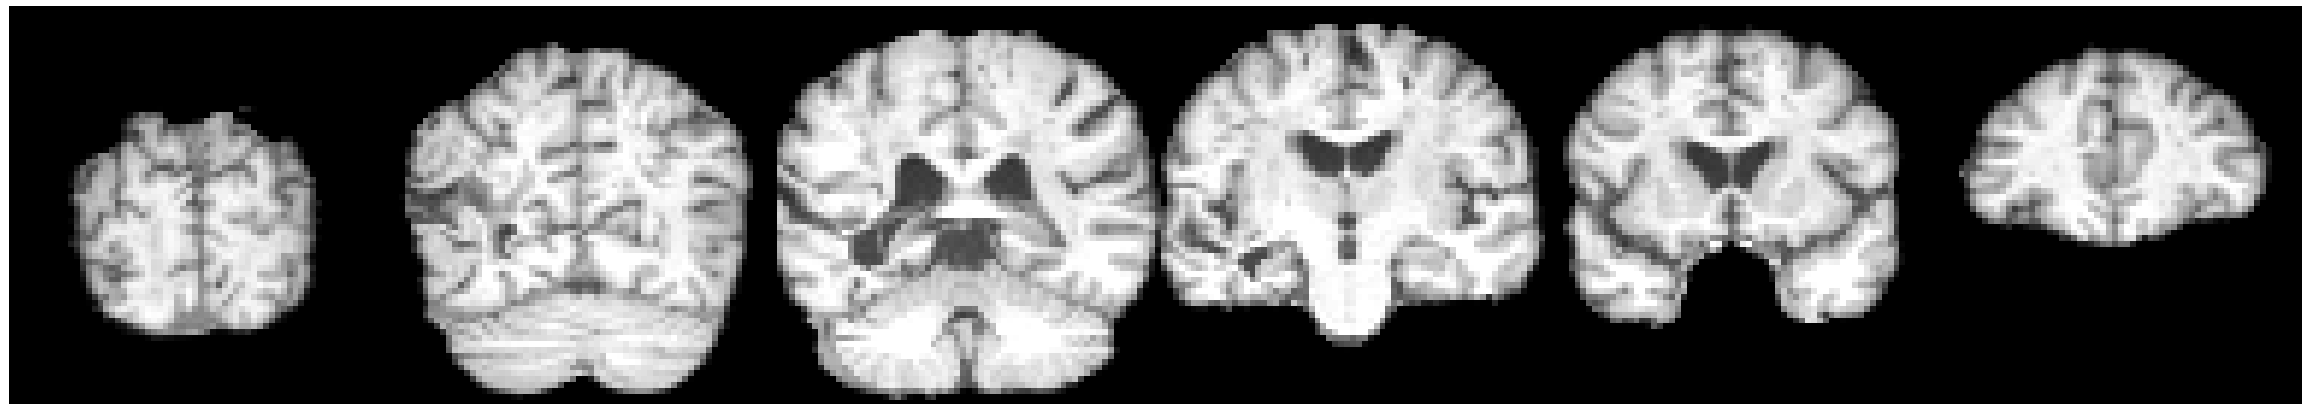

Lesion Overlay

red = Manual Tracing  
blue = LINDA prediction

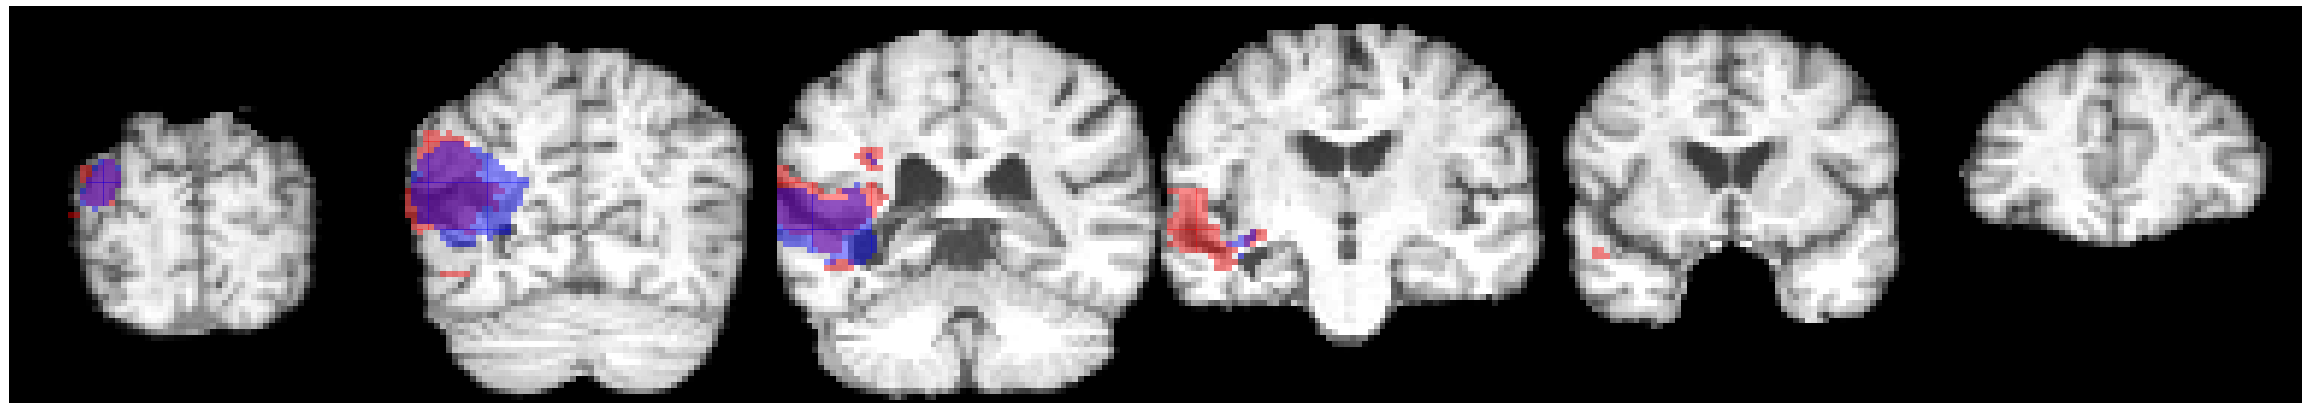

## Subject 42 – WBT

|                                          | Value   |
|------------------------------------------|---------|
| Lesion Volume (ml)                       | 125.736 |
| Dice Coefficient                         | 0.772   |
| Jaccard Coefficient                      | 0.629   |
| Hausdorff Distance (mm)                  | 18.547  |
| Average Displacement (mm)                | 1.594   |
| Sensitivity (Recall, true positive rate) | 0.711   |
| Specificity (true negative rate)         | 0.998   |

Normalized T1

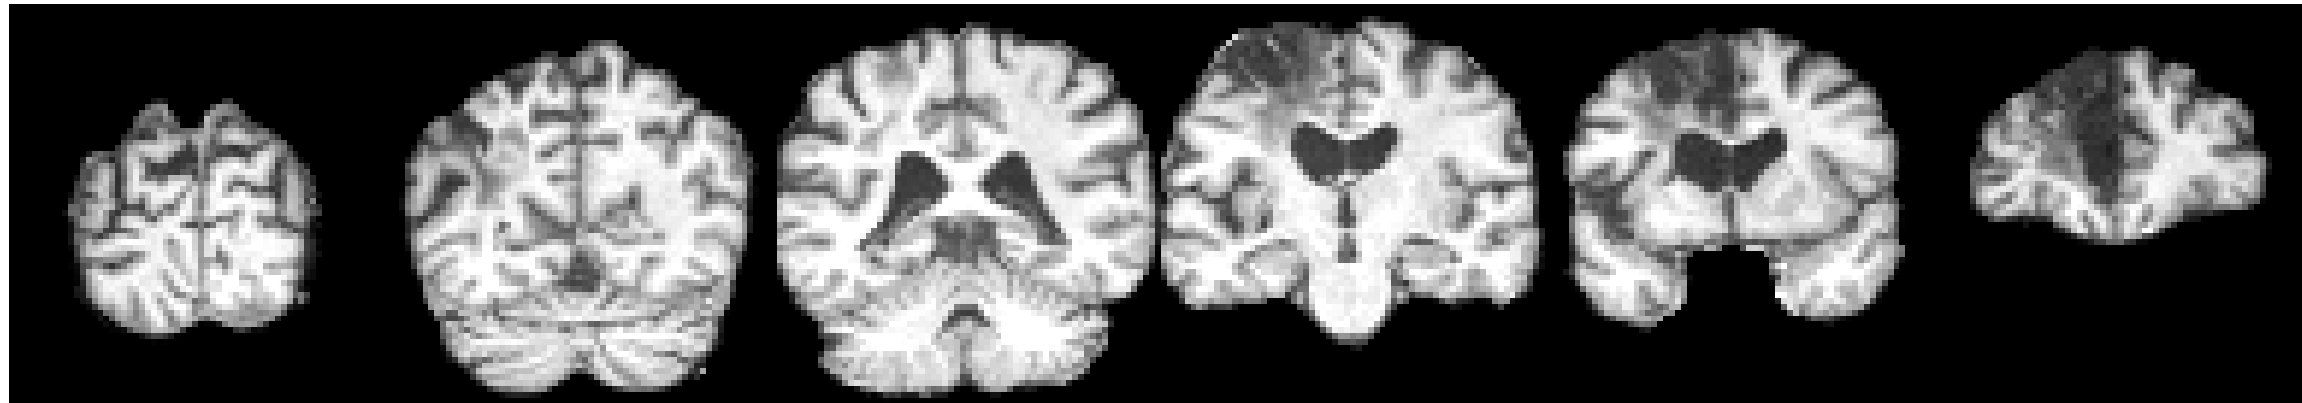

Lesion Overlay

red = Manual Tracing  
blue = LINDA prediction

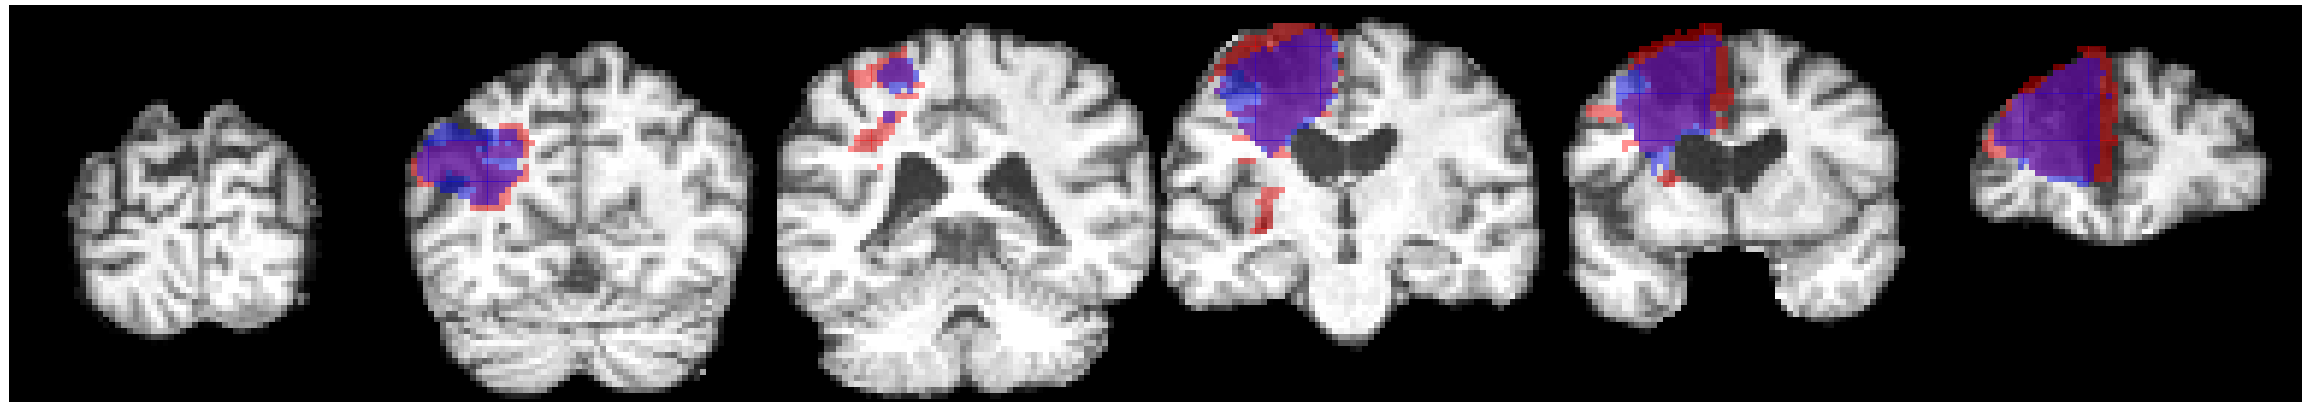

# Subject 43 – WSS

|                                          | Value   |
|------------------------------------------|---------|
| Lesion Volume (ml)                       | 111.048 |
| Dice Coefficient                         | 0.789   |
| Jaccard Coefficient                      | 0.651   |
| Hausdorff Distance (mm)                  | 40.2    |
| Average Displacement (mm)                | 8.682   |
| Sensitivity (Recall, true positive rate) | 0.802   |
| Specificity (true negative rate)         | 0.997   |

Normalized T1

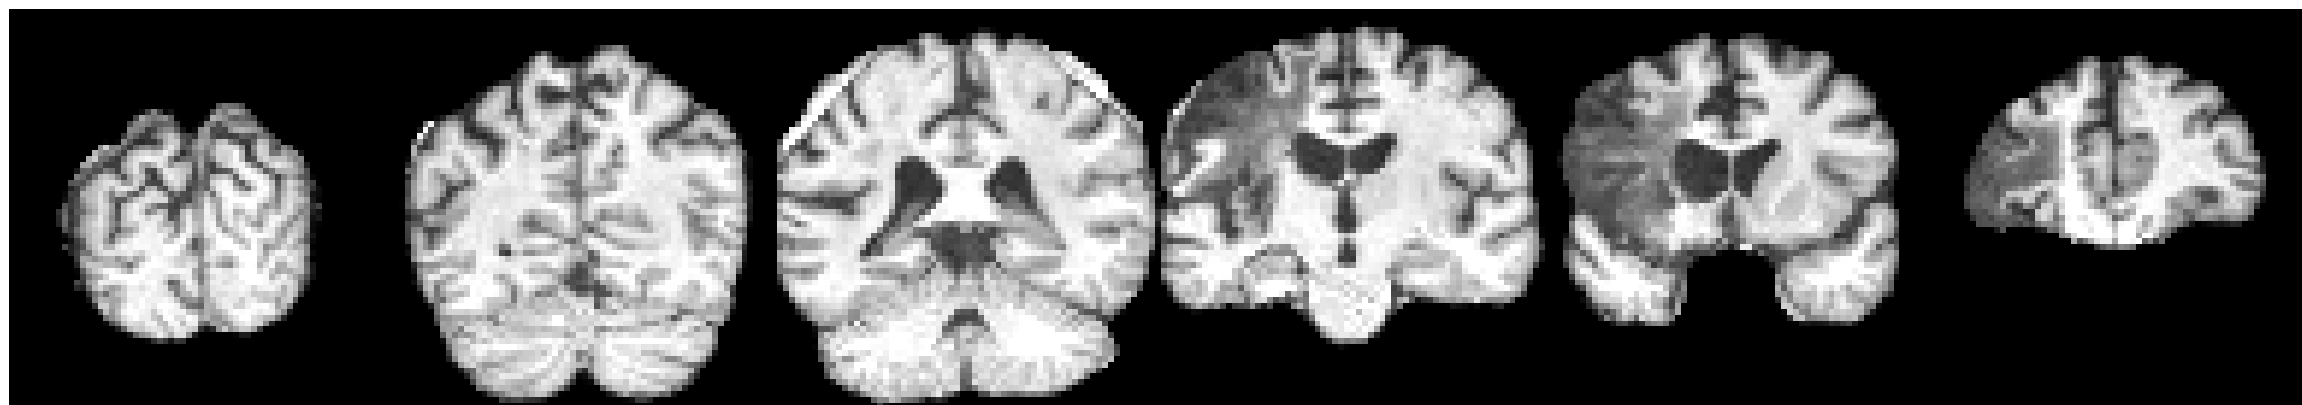

Lesion Overlay

red = Manual Tracing  
blue = LINDA prediction

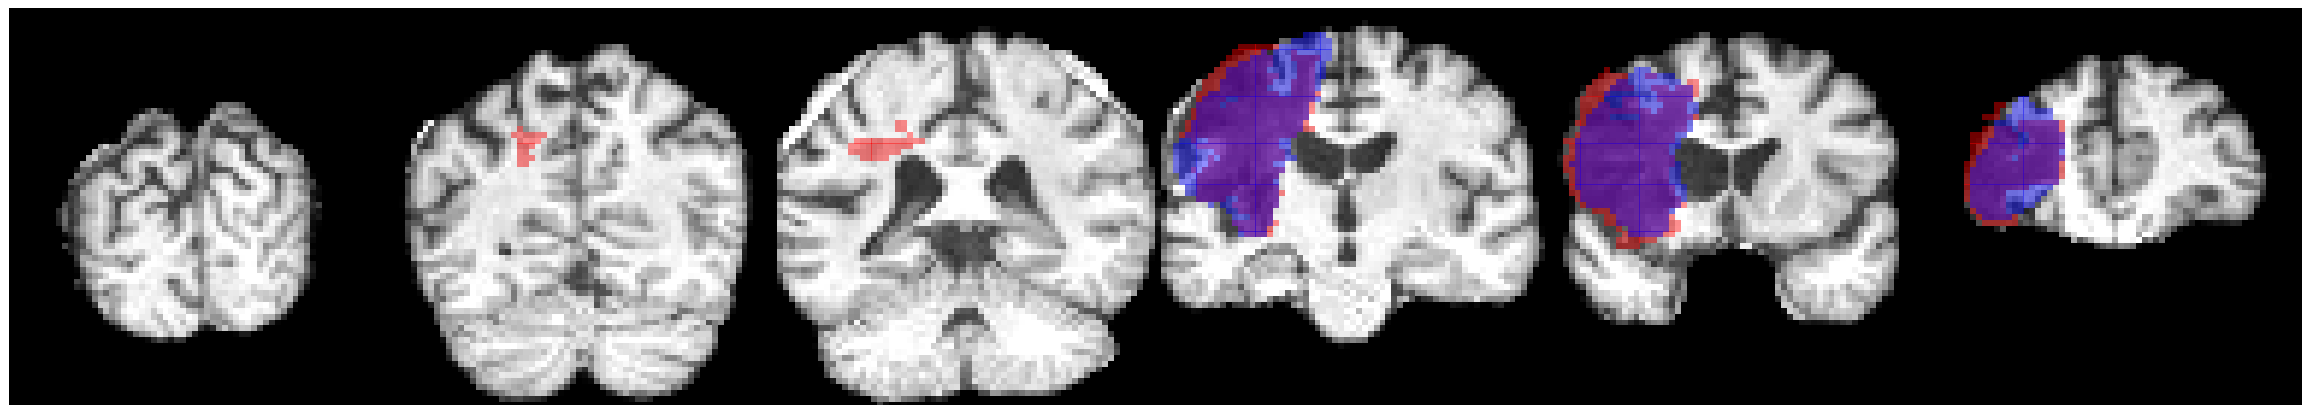

# Subject 44 – XTK

|                                          | Value   |
|------------------------------------------|---------|
| Lesion Volume (ml)                       | 148.128 |
| Dice Coefficient                         | 0.786   |
| Jaccard Coefficient                      | 0.648   |
| Hausdorff Distance (mm)                  | 18.439  |
| Average Displacement (mm)                | 3.409   |
| Sensitivity (Recall, true positive rate) | 0.747   |
| Specificity (true negative rate)         | 0.997   |

Normalized T1

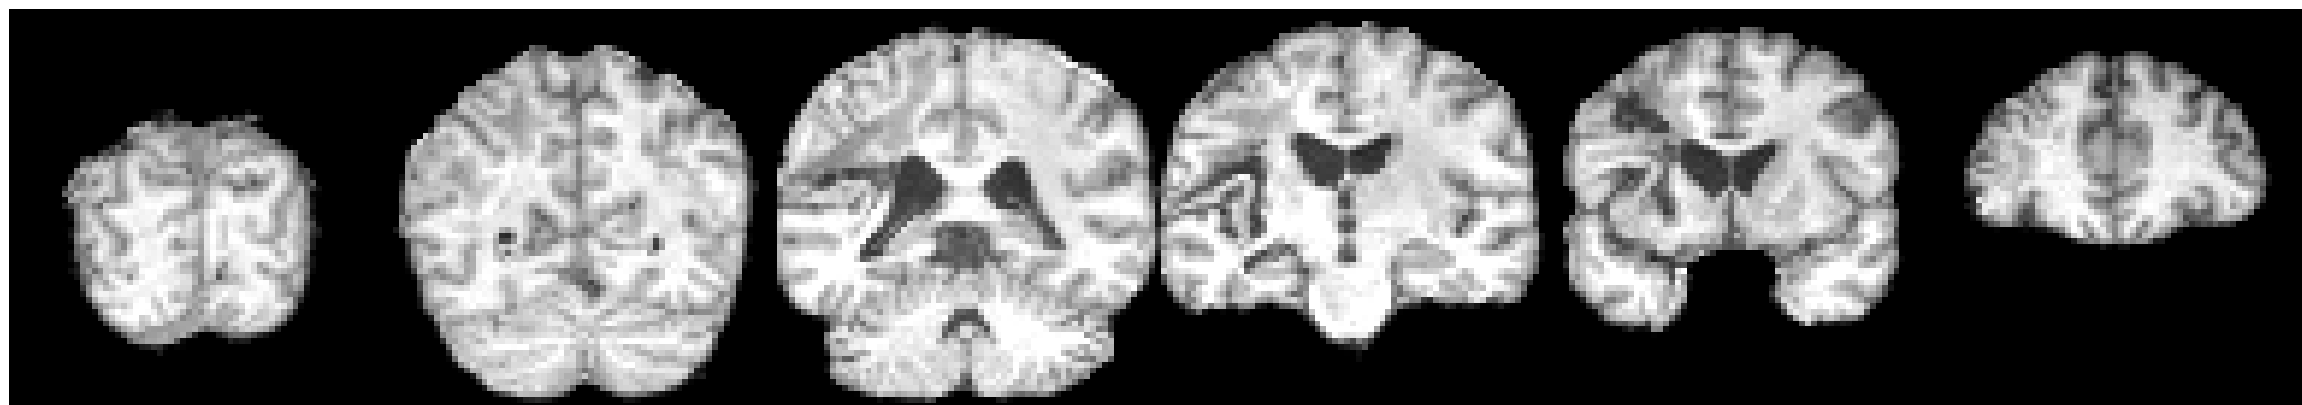

Lesion Overlay

red = Manual Tracing  
blue = LINDA prediction

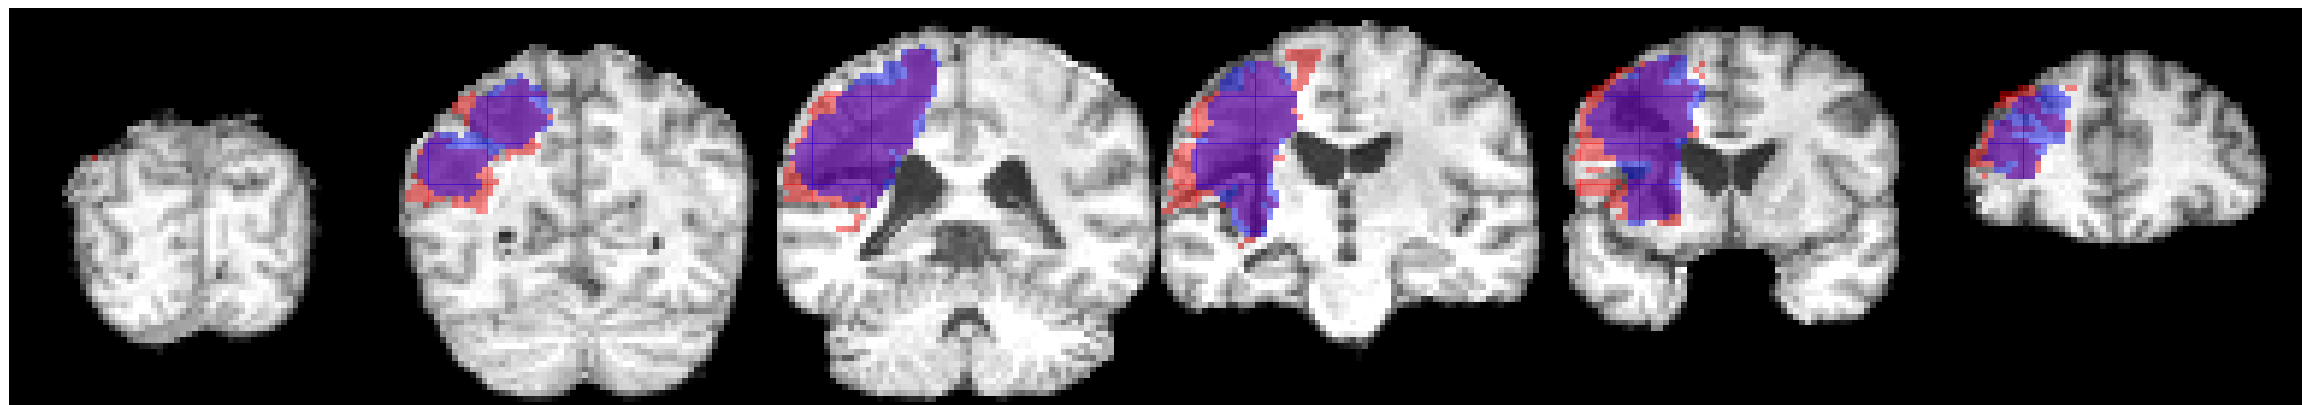

# Subject 45 – ZNP

|                                          | Value  |
|------------------------------------------|--------|
| Lesion Volume (ml)                       | 22.208 |
| Dice Coefficient                         | 0.677  |
| Jaccard Coefficient                      | 0.512  |
| Hausdorff Distance (mm)                  | 10.954 |
| Average Displacement (mm)                | 1.872  |
| Sensitivity (Recall, true positive rate) | 0.765  |
| Specificity (true negative rate)         | 0.999  |

Normalized T1

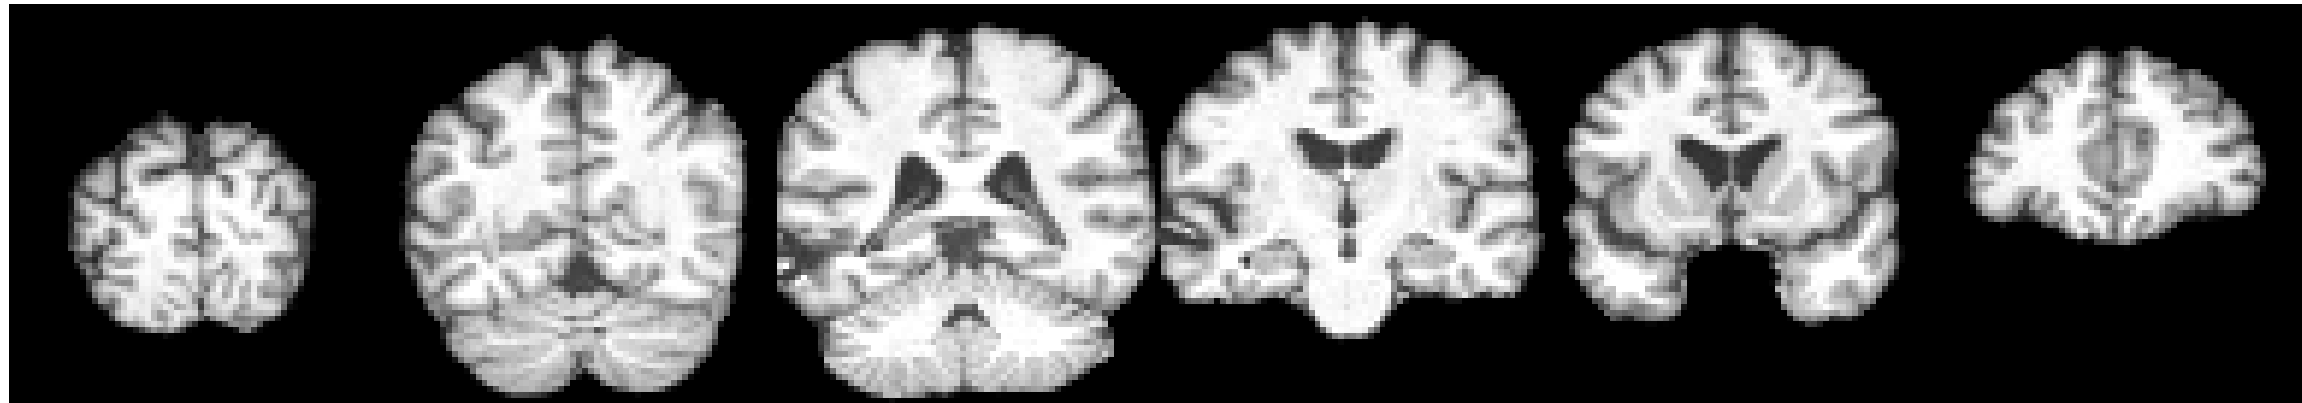

Lesion Overlay

red = Manual Tracing  
blue = LINDA prediction

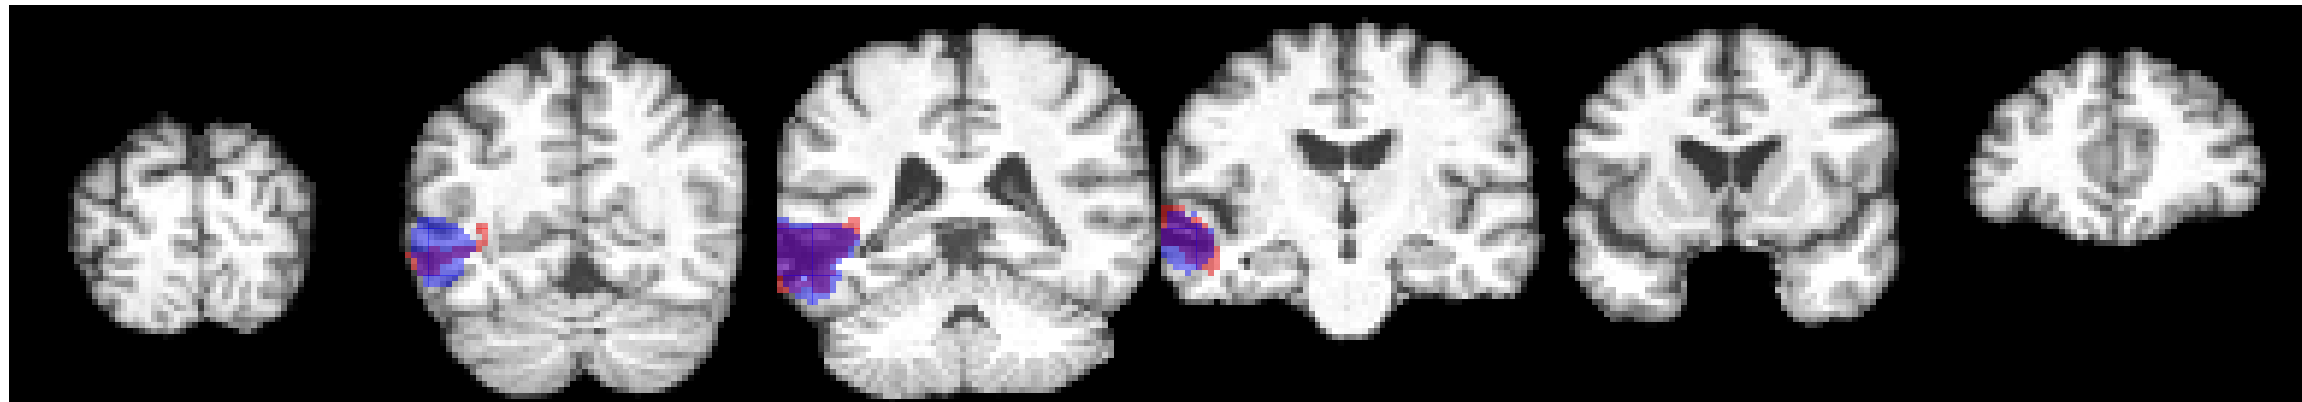

Supplement: HBM-37-1405-s002.pdf [file HBM-37-1405-s002.pdf]
