# Supplementary material
Source: PubMed Central journal article supplement (PMC6867250)

# The 12 Features created from a single T1

\*Asterisks denote features included in the final algorithm.

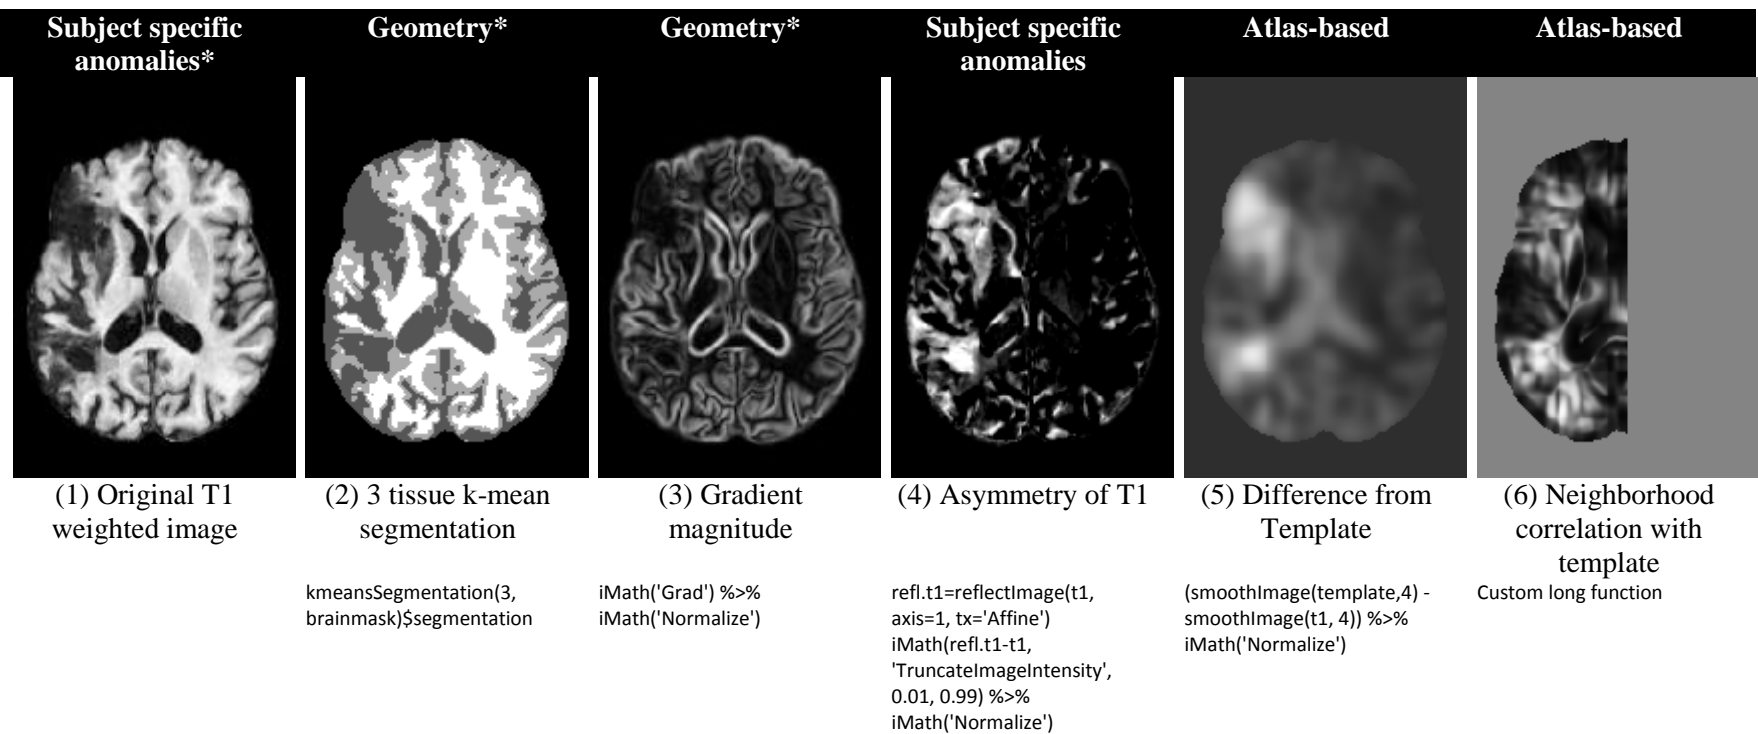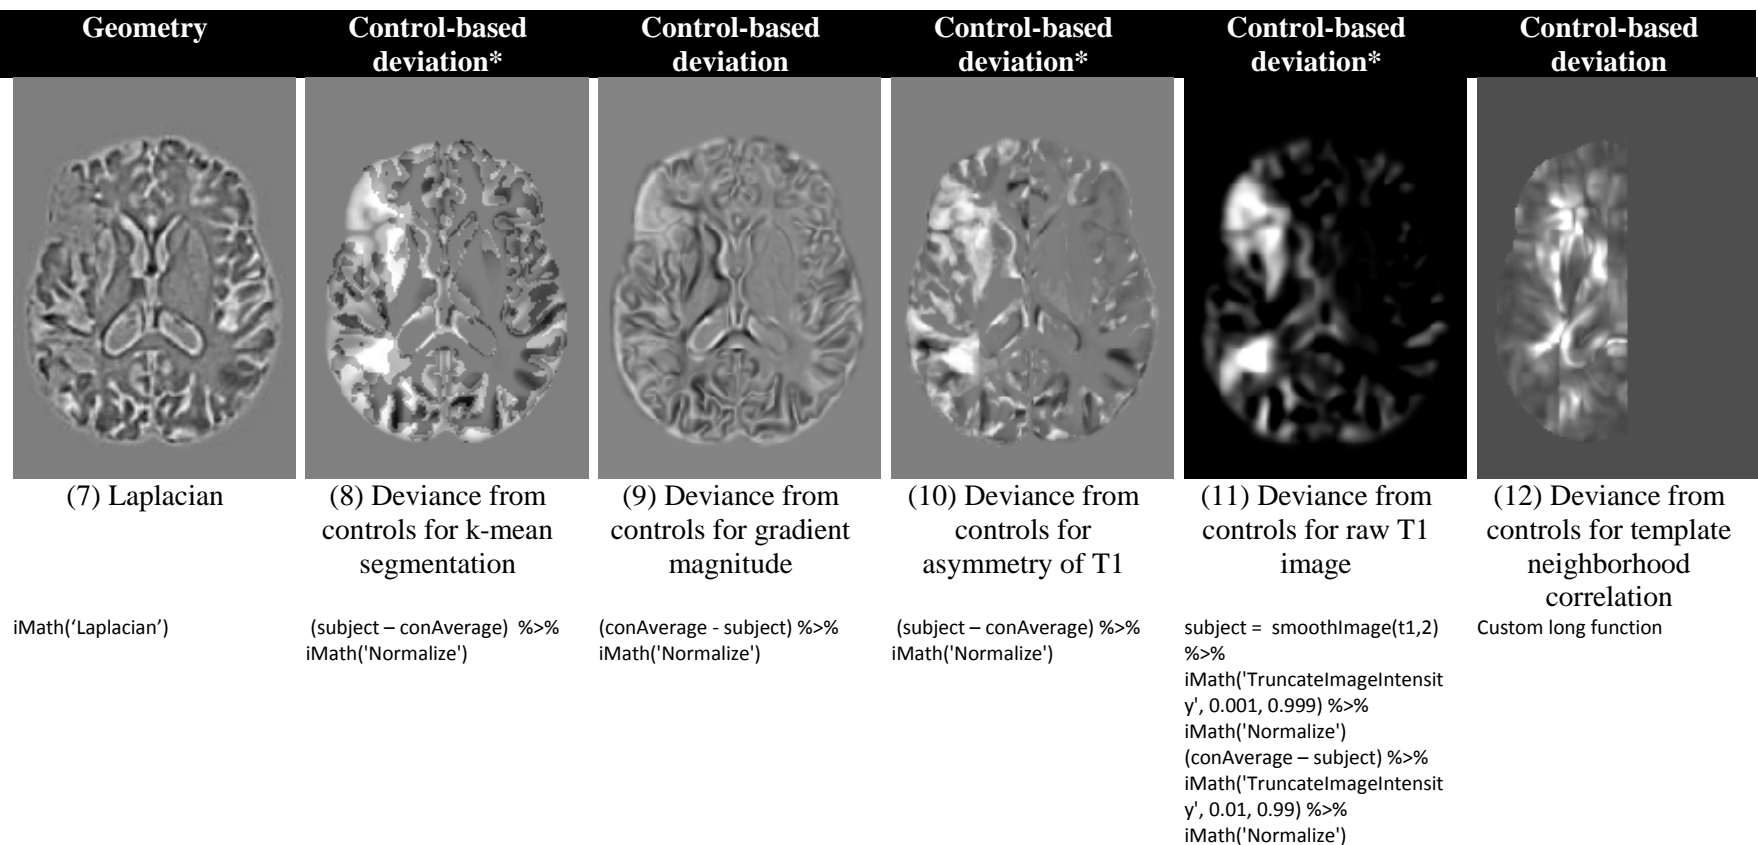

Supplement: HBM-37-1405-s003.pdf [file HBM-37-1405-s003.pdf]
